# Supplementary material for: Translational contributions to tissue specificity in rhythmic and constitutive gene expression
Source: Genome Biol. 2017 Jun 16;18:116. doi: 10.1186/s13059-017-1222-2 (PMC5473967; doi:10.1186/s13059-017-1222-2)
Supplement: Supplementary file 2 — Mapping outcome summary. This file contains information on the deep-sequencing data from kidney (raw read counts, mapping summary etc.) (XLSX 23 kb) [file 13059_2017_1222_MOESM2_ESM.xlsx]

## Sheet: Raw_reads
	time	replicate	library type	number of sequenced reads
1	ZT00	1	RNA-seq	72796219
2	ZT02	1	RNA-seq	67100666
3	ZT04	1	RNA-seq	64638982
4	ZT06	1	RNA-seq	49111240
5	ZT08	1	RNA-seq	42272321
6	ZT10	1	RNA-seq	42521958
7	ZT12	1	RNA-seq	108380941
8	ZT14	1	RNA-seq	35634064
9	ZT16	1	RNA-seq	48284152
10	ZT18	1	RNA-seq	42531735
11	ZT20	1	RNA-seq	36786613
12	ZT22	1	RNA-seq	48052469
13	ZT00	2	RNA-seq	68231715
14	ZT02	2	RNA-seq	52957799
15	ZT04	2	RNA-seq	80036515
16	ZT06	2	RNA-seq	49412609
17	ZT08	2	RNA-seq	46853945
18	ZT10	2	RNA-seq	50254044
19	ZT12	2	RNA-seq	43376294
20	ZT14	2	RNA-seq	51561373
21	ZT16	2	RNA-seq	62946730
22	ZT18	2	RNA-seq	32490400
23	ZT20	2	RNA-seq	35536047
24	ZT22	2	RNA-seq	35083438
25	ZT00	1	RPF-seq	62708587
26	ZT02	1	RPF-seq	37561467
27	ZT04	1	RPF-seq	30946703
28	ZT06	1	RPF-seq	39201896
29	ZT08	1	RPF-seq	39711730
30	ZT10	1	RPF-seq	45229805
31	ZT12	1	RPF-seq	49264635
32	ZT14	1	RPF-seq	38883894
33	ZT16	1	RPF-seq	42767002
34	ZT18	1	RPF-seq	32111293
35	ZT20	1	RPF-seq	38648982
36	ZT22	1	RPF-seq	29553023
37	ZT00	2	RPF-seq	46287779
38	ZT02	2	RPF-seq	28203909
39	ZT04	2	RPF-seq	35564197
40	ZT06	2	RPF-seq	75099993
41	ZT08	2	RPF-seq	37469950
42	ZT10	2	RPF-seq	52999960
43	ZT12	2	RPF-seq	50734526
44	ZT14	2	RPF-seq	28117910
45	ZT16	2	RPF-seq	42603445
46	ZT18	2	RPF-seq	37775131
47	ZT20	2	RPF-seq	31796435
48	ZT22	2	RPF-seq	46106714

## Sheet: Mapping_summary_kidney_RPF-seq
	time	replicate	map_type	read counts	percentage
1	ZT00	1	cDNA	39583772	63.1234
2	ZT02	1	cDNA	23678961	63.0406
3	ZT04	1	cDNA	20078488	64.8809
4	ZT06	1	cDNA	19675570	50.1904
5	ZT08	1	cDNA	24341048	61.2944
6	ZT10	1	cDNA	26594502	58.7986
7	ZT12	1	cDNA	26949729	54.704
8	ZT14	1	cDNA	21560227	55.4477
9	ZT16	1	cDNA	24066356	56.2732
10	ZT18	1	cDNA	19500733	60.7286
11	ZT20	1	cDNA	25168879	65.1217
12	ZT22	1	cDNA	18801905	63.6209
13	ZT00	2	cDNA	24441754	52.8039
14	ZT02	2	cDNA	19227020	68.1715
15	ZT04	2	cDNA	22361111	62.8753
16	ZT06	2	cDNA	27813716	37.0356
17	ZT08	2	cDNA	22196692	59.2386
18	ZT10	2	cDNA	33249707	62.7353
19	ZT12	2	cDNA	26175251	51.5926
20	ZT14	2	cDNA	18373501	65.3445
21	ZT16	2	cDNA	22424725	52.6359
22	ZT18	2	cDNA	23298563	61.677
23	ZT20	2	cDNA	18277994	57.4844
24	ZT22	2	cDNA	26925165	58.3975
25	ZT00	1	Genome	3964992	6.32289
26	ZT02	1	Genome	1939598	5.1638
27	ZT04	1	Genome	1741443	5.62723
28	ZT06	1	Genome	2181725	5.56536
29	ZT08	1	Genome	2219145	5.58813
30	ZT10	1	Genome	2259687	4.99601
31	ZT12	1	Genome	3248639	6.59426
32	ZT14	1	Genome	2735484	7.03501
33	ZT16	1	Genome	3229049	7.55033
34	ZT18	1	Genome	2224505	6.92748
35	ZT20	1	Genome	2456227	6.35522
36	ZT22	1	Genome	1681077	5.68834
37	ZT00	2	Genome	2608653	5.63573
38	ZT02	2	Genome	1451170	5.14528
39	ZT04	2	Genome	2060313	5.79322
40	ZT06	2	Genome	2992059	3.9841
41	ZT08	2	Genome	1994391	5.32264
42	ZT10	2	Genome	2324793	4.38641
43	ZT12	2	Genome	3509044	6.91648
44	ZT14	2	Genome	1405495	4.99858
45	ZT16	2	Genome	2165069	5.08191
46	ZT18	2	Genome	2023088	5.35561
47	ZT20	2	Genome	1932475	6.07765
48	ZT22	2	Genome	2723637	5.90725
73	ZT00	1	tRNA	1067107	1.70169
74	ZT02	1	tRNA	663605	1.76672
75	ZT04	1	tRNA	389975	1.26015
76	ZT06	1	tRNA	1225303	3.12562
77	ZT08	1	tRNA	775592	1.95306
78	ZT10	1	tRNA	719825	1.59148
79	ZT12	1	tRNA	1608053	3.26411
80	ZT14	1	tRNA	1388713	3.57144
81	ZT16	1	tRNA	1707591	3.99278
82	ZT18	1	tRNA	785583	2.44644
83	ZT20	1	tRNA	966705	2.50124
84	ZT22	1	tRNA	1170649	3.96118
85	ZT00	2	tRNA	699774	1.51179
86	ZT02	2	tRNA	420875	1.49226
87	ZT04	2	tRNA	427901	1.20318
88	ZT06	2	tRNA	950161	1.26519
89	ZT08	2	tRNA	384260	1.02552
90	ZT10	2	tRNA	547134	1.03233
91	ZT12	2	tRNA	4457654	8.78623
92	ZT14	2	tRNA	449438	1.5984
93	ZT16	2	tRNA	1208728	2.83716
94	ZT18	2	tRNA	898244	2.37787
95	ZT20	2	tRNA	1258884	3.9592
96	ZT22	2	tRNA	1587243	3.44254
97	ZT00	1	rRNA	15271290	24.3528
98	ZT02	1	rRNA	9864464	26.2622
99	ZT04	1	rRNA	7604263	24.5721
100	ZT06	1	rRNA	10074534	25.6991
101	ZT08	1	rRNA	8381629	21.1062
102	ZT10	1	rRNA	14287558	31.5888
103	ZT12	1	rRNA	11073450	22.4775
104	ZT14	1	rRNA	10152775	26.1105
105	ZT16	1	rRNA	10046442	23.4911
106	ZT18	1	rRNA	7854677	24.4608
107	ZT20	1	rRNA	9223501	23.8648
108	ZT22	1	rRNA	6411057	21.6934
109	ZT00	2	rRNA	16433994	35.504
110	ZT02	2	rRNA	6360226	22.5509
111	ZT04	2	rRNA	9754943	27.4291
112	ZT06	2	rRNA	40022976	53.2929
113	ZT08	2	rRNA	11380409	30.3721
114	ZT10	2	rRNA	14791207	27.908
115	ZT12	2	rRNA	14024913	27.6437
116	ZT14	2	rRNA	6072169	21.5954
117	ZT16	2	rRNA	13256556	31.1162
118	ZT18	2	rRNA	8625077	22.8327
119	ZT20	2	rRNA	8644427	27.1868
120	ZT22	2	rRNA	12540776	27.1995
121	ZT00	1	None	2821426	4.49927
122	ZT02	1	None	1414839	3.76673
123	ZT04	1	None	1132534	3.65963
124	ZT06	1	None	6044764	15.4196
125	ZT08	1	None	3994316	10.0583
126	ZT10	1	None	1368233	3.02507
127	ZT12	1	None	6384764	12.9601
128	ZT14	1	None	3046695	7.83536
129	ZT16	1	None	3717564	8.6926
130	ZT18	1	None	1745795	5.4367
131	ZT20	1	None	833670	2.15703
132	ZT22	1	None	1488335	5.03615
133	ZT00	2	None	2103604	4.54462
134	ZT02	2	None	744618	2.64012
135	ZT04	2	None	959929	2.69914
136	ZT06	2	None	3321081	4.42221
137	ZT08	2	None	1514198	4.0411
138	ZT10	2	None	2087119	3.93796
139	ZT12	2	None	2567664	5.06098
140	ZT14	2	None	1817307	6.46317
141	ZT16	2	None	3548367	8.32883
142	ZT18	2	None	2930159	7.75685
143	ZT20	2	None	1682655	5.29196
144	ZT22	2	None	2329893	5.05326

## Sheet: Mapping_summary_kidney_RNA-seq
	time	replicate	map_type	read counts	percentage
1	ZT00	1	cDNA	32134560	44.1432
2	ZT02	1	cDNA	30795811	45.8949
3	ZT04	1	cDNA	31425838	48.6175
4	ZT06	1	cDNA	26607255	54.1775
5	ZT08	1	cDNA	22198382	52.5128
6	ZT10	1	cDNA	21051395	49.5071
7	ZT12	1	cDNA	56794371	52.4025
8	ZT14	1	cDNA	20077151	56.3426
9	ZT16	1	cDNA	24610226	50.9696
10	ZT18	1	cDNA	22536527	52.9876
11	ZT20	1	cDNA	18832199	51.1931
12	ZT22	1	cDNA	24530043	51.0485
13	ZT00	2	cDNA	29767856	43.6276
14	ZT02	2	cDNA	25468168	48.0914
15	ZT04	2	cDNA	38615334	48.2471
16	ZT06	2	cDNA	25740601	52.0932
17	ZT08	2	cDNA	23943057	51.1015
18	ZT10	2	cDNA	33033469	65.733
19	ZT12	2	cDNA	30686142	70.744
20	ZT14	2	cDNA	28007108	54.318
21	ZT16	2	cDNA	32753446	52.0336
22	ZT18	2	cDNA	18684911	57.509
23	ZT20	2	cDNA	18120884	50.993
24	ZT22	2	cDNA	18499222	52.7292
25	ZT00	1	Genome	12350248	16.9655
26	ZT02	1	Genome	11589298	17.2715
27	ZT04	1	Genome	12274750	18.9897
28	ZT06	1	Genome	8909281	18.141
29	ZT08	1	Genome	7883805	18.65
30	ZT10	1	Genome	7529887	17.7082
31	ZT12	1	Genome	20668709	19.0704
32	ZT14	1	Genome	6700638	18.804
33	ZT16	1	Genome	8581838	17.7736
34	ZT18	1	Genome	6768059	15.913
35	ZT20	1	Genome	5429164	14.7585
36	ZT22	1	Genome	6453379	13.4299
37	ZT00	2	Genome	11411822	16.7251
38	ZT02	2	Genome	9006853	17.0076
39	ZT04	2	Genome	14111451	17.6313
40	ZT06	2	Genome	9272597	18.7656
41	ZT08	2	Genome	8571633	18.2944
42	ZT10	2	Genome	9027124	17.963
43	ZT12	2	Genome	8645561	19.9315
44	ZT14	2	Genome	9247402	17.9347
45	ZT16	2	Genome	10771753	17.1125
46	ZT18	2	Genome	5370220	16.5286
47	ZT20	2	Genome	4779421	13.4495
48	ZT22	2	Genome	4864237	13.8648
73	ZT00	1	tRNA	333187	0.457698
74	ZT02	1	tRNA	284296	0.423686
75	ZT04	1	tRNA	323253	0.50009
76	ZT06	1	tRNA	290110	0.59072
77	ZT08	1	tRNA	308156	0.728978
78	ZT10	1	tRNA	377356	0.887438
79	ZT12	1	tRNA	414484	0.382433
80	ZT14	1	tRNA	154279	0.432954
81	ZT16	1	tRNA	142810	0.29577
82	ZT18	1	tRNA	99021	0.232817
83	ZT20	1	tRNA	106772	0.290247
84	ZT22	1	tRNA	89721	0.186715
85	ZT00	2	tRNA	252442	0.369978
86	ZT02	2	tRNA	192241	0.363008
87	ZT04	2	tRNA	314621	0.393097
88	ZT06	2	tRNA	300285	0.607709
89	ZT08	2	tRNA	333691	0.712194
90	ZT10	2	tRNA	146100	0.290723
91	ZT12	2	tRNA	120487	0.277772
92	ZT14	2	tRNA	164864	0.319743
93	ZT16	2	tRNA	200839	0.319062
94	ZT18	2	tRNA	78253	0.24085
95	ZT20	2	tRNA	58656	0.165061
96	ZT22	2	tRNA	75995	0.216612
97	ZT00	1	rRNA	25614186	35.1861
98	ZT02	1	rRNA	22257178	33.1698
99	ZT04	1	rRNA	18543675	28.6881
100	ZT06	1	rRNA	11655912	23.7337
101	ZT08	1	rRNA	10336515	24.4522
102	ZT10	1	rRNA	12258032	28.8275
103	ZT12	1	rRNA	27627056	25.4907
104	ZT14	1	rRNA	7446245	20.8964
105	ZT16	1	rRNA	13542630	28.0478
106	ZT18	1	rRNA	12344826	29.025
107	ZT20	1	rRNA	11810902	32.1065
108	ZT22	1	rRNA	15944417	33.1813
109	ZT00	2	rRNA	24467551	35.8595
110	ZT02	2	rRNA	16480360	31.1198
111	ZT04	2	rRNA	24367845	30.4459
112	ZT06	2	rRNA	12221028	24.7326
113	ZT08	2	rRNA	12508143	26.696
114	ZT10	2	rRNA	6803376	13.538
115	ZT12	2	rRNA	2848608	6.5672
116	ZT14	2	rRNA	12630053	24.4952
117	ZT16	2	rRNA	17309145	27.4981
118	ZT18	2	rRNA	7857409	24.1838
119	ZT20	2	rRNA	11974435	33.6966
120	ZT22	2	rRNA	11008949	31.3793
121	ZT00	1	None	2364038	3.24747
122	ZT02	1	None	2174083	3.24003
123	ZT04	1	None	2071466	3.20467
124	ZT06	1	None	1648682	3.35704
125	ZT08	1	None	1545463	3.65597
126	ZT10	1	None	1305288	3.06968
127	ZT12	1	None	2876321	2.6539
128	ZT14	1	None	1255751	3.52402
129	ZT16	1	None	1406648	2.91327
130	ZT18	1	None	783302	1.84169
131	ZT20	1	None	607576	1.65162
132	ZT22	1	None	1034909	2.15371
133	ZT00	2	None	2332044	3.41783
134	ZT02	2	None	1810177	3.41815
135	ZT04	2	None	2627264	3.28258
136	ZT06	2	None	1878098	3.80085
137	ZT08	2	None	1497421	3.19593
138	ZT10	2	None	1243975	2.47537
139	ZT12	2	None	1075496	2.47946
140	ZT14	2	None	1511946	2.93232
141	ZT16	2	None	1911547	3.03677
142	ZT18	2	None	499607	1.53771
143	ZT20	2	None	602651	1.69589
144	ZT22	2	None	635035	1.81007
