# Supplementary material for: Translational contributions to tissue specificity in rhythmic and constitutive gene expression
Source: Genome Biol. 2017 Jun 16;18:116. doi: 10.1186/s13059-017-1222-2 (PMC5473967; doi:10.1186/s13059-017-1222-2)
Supplement: Supplementary file 3 — Differential TE analysis. This file contains details of the GO-term analysis on the differential TE gene set of Fig. 2. (XLSX 228 kb) [file 13059_2017_1222_MOESM3_ESM.xlsx]

## Sheet: Differential TE genes
Genes with differential TE, related to Figure 2D. In green: 640 genes with higher TE in liver. In orange: 320 genes with higher TE in kidney.
Statistically significant differences with FDR<0.01 and a TE ratio of 1.5-fold.
GeneID	TE ratio (kidney/liver, log2)	adjusted p-value	gene name	single isoform gene
ENSMUSG00000028706	-5.85611	1.42126e-06	Nsun4	FALSE
ENSMUSG00000000301	-2.9191	1.42126e-06	Pemt	FALSE
ENSMUSG00000026525	-2.79467	5.63004e-06	Opn3	TRUE
ENSMUSG00000064345	-2.75089	1.42126e-06	mt-Nd2	TRUE
ENSMUSG00000064363	-2.52817	1.42126e-06	mt-Nd4	TRUE
ENSMUSG00000064357	-2.23918	1.42126e-06	mt-Atp6	TRUE
ENSMUSG00000074264	-2.20897	1.42126e-06	Amy1	FALSE
ENSMUSG00000024661	-2.1898	1.42126e-06	Fth1	TRUE
ENSMUSG00000050708	-2.15129	1.42126e-06	Ftl1	TRUE
ENSMUSG00000042066	-2.11879	2.222e-06	Tmcc2	TRUE
ENSMUSG00000013701	-2.08529	1.42126e-06	Timm23	FALSE
ENSMUSG00000064356	-2.07469	1.42126e-06	mt-Atp8	TRUE
ENSMUSG00000021340	-1.92367	1.42126e-06	Gpld1	FALSE
ENSMUSG00000040964	-1.91697	1.42126e-06	Arhgef10l	FALSE
ENSMUSG00000038517	-1.84064	2.222e-06	Tbkbp1	FALSE
ENSMUSG00000023031	-1.83198	1.42126e-06	Cela1	TRUE
ENSMUSG00000003378	-1.81078	7.48806e-06	Grik5	TRUE
ENSMUSG00000064367	-1.8107	1.42126e-06	mt-Nd5	TRUE
ENSMUSG00000029461	-1.79162	2.222e-06	Fam168a	FALSE
ENSMUSG00000051339	-1.78447	1.42126e-06	2900026A02Rik	TRUE
ENSMUSG00000046447	-1.698	1.42126e-06	Camk2n1	TRUE
ENSMUSG00000030688	-1.66282	1.42126e-06	Stard10	FALSE
ENSMUSG00000020698	-1.65155	2.222e-06	Cct6b	FALSE
ENSMUSG00000078922	-1.64957	7.48806e-06	Tgtp1	FALSE
ENSMUSG00000024019	-1.64779	2.222e-06	Cmtr1	FALSE
ENSMUSG00000075528	-1.62967	4.35563e-06	Aarsd1	TRUE
ENSMUSG00000030035	-1.62887	1.42126e-06	Wbp1	FALSE
ENSMUSG00000035459	-1.60791	1.42126e-06	Stab2	FALSE
ENSMUSG00000026811	-1.60543	1.42126e-06	St6galnac6	FALSE
ENSMUSG00000020857	-1.60247	2.222e-06	Nme2	FALSE
ENSMUSG00000064370	-1.57185	1.42126e-06	mt-Cytb	TRUE
ENSMUSG00000032387	-1.53597	1.42126e-06	Rbpms2	FALSE
ENSMUSG00000039568	-1.53394	4.35563e-06	Ubald1	TRUE
ENSMUSG00000025197	-1.52569	1.42126e-06	Cyp2c44	TRUE
ENSMUSG00000025409	-1.50031	1.42126e-06	Mbd6	FALSE
ENSMUSG00000072704	-1.49821	1.42126e-06	2700089E24Rik	TRUE
ENSMUSG00000070644	-1.48927	1.42126e-06	Etnk2	TRUE
ENSMUSG00000061474	-1.48086	1.42126e-06	Mrps36	TRUE
ENSMUSG00000061461	-1.46058	1.42126e-06	Smim20	FALSE
ENSMUSG00000096255	-1.45988	1.42126e-06	Dynlt1b	TRUE
ENSMUSG00000092008	-1.45603	3.0285e-06	Cyp2c69	TRUE
ENSMUSG00000057863	-1.45181	6.73493e-05	Rpl36	TRUE
ENSMUSG00000021127	-1.45096	1.42126e-06	Zfp36l1	TRUE
ENSMUSG00000006476	-1.44744	1.42126e-06	Nsmf	FALSE
ENSMUSG00000023904	-1.44238	1.42126e-06	Hcfc1r1	FALSE
ENSMUSG00000038803	-1.42748	1.42126e-06	Ost4	FALSE
ENSMUSG00000026077	-1.42505	0.00046573	Npas2	FALSE
ENSMUSG00000038742	-1.42045	1.42126e-06	Angptl6	TRUE
ENSMUSG00000037600	-1.41129	2.222e-06	1810019J16Rik	FALSE
ENSMUSG00000062593	-1.41103	5.63004e-06	Lilrb4	FALSE
ENSMUSG00000037750	-1.39978	1.42126e-06	Fam222b	FALSE
ENSMUSG00000042293	-1.39011	1.42126e-06	Gm5617	TRUE
ENSMUSG00000041164	-1.37298	1.42126e-06	Zmiz2	FALSE
ENSMUSG00000038055	-1.36949	1.60627e-05	Dexi	FALSE
ENSMUSG00000028958	-1.36735	1.42126e-06	Tmub1	FALSE
ENSMUSG00000037503	-1.36311	1.42126e-06	Fam168b	FALSE
ENSMUSG00000085795	-1.34819	2.222e-06	Zfp703	FALSE
ENSMUSG00000022102	-1.34459	1.33829e-05	Dok2	TRUE
ENSMUSG00000029376	-1.34379	5.5706e-05	Mthfd2l	TRUE
ENSMUSG00000028639	-1.3347	1.42126e-06	Ybx1	FALSE
ENSMUSG00000038641	-1.29319	1.42126e-06	Akr1d1	TRUE
ENSMUSG00000023206	-1.26515	9.81236e-06	Il15ra	FALSE
ENSMUSG00000064341	-1.26243	2.222e-06	mt-Nd1	TRUE
ENSMUSG00000036957	-1.26001	3.0285e-06	Lrfn3	TRUE
ENSMUSG00000032796	-1.25007	1.42126e-06	Lama1	TRUE
ENSMUSG00000024981	-1.21952	1.42126e-06	Acsl5	TRUE
ENSMUSG00000025271	-1.21827	1.42126e-06	Pfkfb1	FALSE
ENSMUSG00000029003	-1.21406	1.42126e-06	Mad2l2	FALSE
ENSMUSG00000060131	-1.21383	0.000185664	Atp8b4	FALSE
ENSMUSG00000040413	-1.21301	1.42126e-06	Timd2	FALSE
ENSMUSG00000026922	-1.21243	1.42126e-06	Agpat2	FALSE
ENSMUSG00000048921	-1.21235	3.0285e-06	Zfp689	TRUE
ENSMUSG00000030922	-1.21147	3.0285e-06	Lyrm1	FALSE
ENSMUSG00000022791	-1.21035	1.42126e-06	Tnk2	FALSE
ENSMUSG00000078572	-1.20643	1.27207e-05	1810043H04Rik	TRUE
ENSMUSG00000005089	-1.19408	1.42126e-06	Slc1a2	FALSE
ENSMUSG00000042349	-1.19133	1.42126e-06	Ikbke	FALSE
ENSMUSG00000020564	-1.17429	1.42126e-06	Atxn7l1	FALSE
ENSMUSG00000079659	-1.17253	1.42126e-06	Tmem243	TRUE
ENSMUSG00000041775	-1.17191	1.42126e-06	Mapk1ip1	FALSE
ENSMUSG00000090264	-1.16898	4.58716e-05	Eif4ebp3	TRUE
ENSMUSG00000034928	-1.16734	1.42126e-06	Rnf44	FALSE
ENSMUSG00000028581	-1.1673	1.42126e-06	Laptm5	TRUE
ENSMUSG00000071713	-1.1658	2.222e-06	Csf2rb	TRUE
ENSMUSG00000022558	-1.16557	1.42126e-06	Mroh1	FALSE
ENSMUSG00000008690	-1.1636	9.81236e-06	Ncaph2	TRUE
ENSMUSG00000037095	-1.14384	1.42126e-06	Lrg1	TRUE
ENSMUSG00000054263	-1.13894	1.42126e-06	Lifr	FALSE
ENSMUSG00000068966	-1.13319	2.222e-06	Zbtb34	FALSE
ENSMUSG00000020483	-1.13053	1.42126e-06	Dynll2	FALSE
ENSMUSG00000061887	-1.12674	1.42126e-06	Ssbp3	FALSE
ENSMUSG00000025871	-1.12565	1.42126e-06	4833439L19Rik	TRUE
ENSMUSG00000035270	-1.12103	0.000222712	Impg2	TRUE
ENSMUSG00000021262	-1.1188	1.42126e-06	Evl	FALSE
ENSMUSG00000016344	-1.11721	2.222e-06	Ppdpf	FALSE
ENSMUSG00000035711	-1.11714	3.0285e-06	Dok3	TRUE
ENSMUSG00000029600	-1.11197	4.35563e-06	1110008J03Rik	FALSE
ENSMUSG00000003154	-1.11137	1.42126e-06	Foxj2	FALSE
ENSMUSG00000042675	-1.11087	1.42126e-06	Ypel3	FALSE
ENSMUSG00000018537	-1.10918	2.52835e-05	Pcgf2	FALSE
ENSMUSG00000019851	-1.10875	1.42126e-06	Perp	TRUE
ENSMUSG00000020610	-1.10502	1.42126e-06	Amz2	FALSE
ENSMUSG00000041540	-1.09793	2.222e-06	Sox5	FALSE
ENSMUSG00000047907	-1.09454	1.42126e-06	Tshz2	FALSE
ENSMUSG00000042677	-1.09164	7.48806e-06	Zc3h12a	TRUE
ENSMUSG00000026426	-1.09048	1.42126e-06	Arl8a	TRUE
ENSMUSG00000024327	-1.0896	1.79713e-05	Slc39a7	FALSE
ENSMUSG00000055912	-1.08931	1.42126e-06	Tmem150a	TRUE
ENSMUSG00000063015	-1.08904	1.42126e-06	Ccni	FALSE
ENSMUSG00000044786	-1.08647	3.0285e-06	Zfp36	TRUE
ENSMUSG00000021840	-1.07905	1.42126e-06	Mapk1ip1l	FALSE
ENSMUSG00000025404	-1.076	1.42126e-06	R3hdm2	FALSE
ENSMUSG00000004931	-1.0706	1.42126e-06	Apba3	TRUE
ENSMUSG00000043079	-1.0699	7.48806e-06	Synpo	FALSE
ENSMUSG00000023963	-1.0662	1.42126e-06	Cyp39a1	TRUE
ENSMUSG00000030228	-1.06368	4.58716e-05	Pik3c2g	FALSE
ENSMUSG00000093938	-1.06104	4.58716e-05	Evi2b	FALSE
ENSMUSG00000026176	-1.05888	1.42126e-06	Ctdsp1	TRUE
ENSMUSG00000039086	-1.05664	9.81236e-06	Ss18l1	TRUE
ENSMUSG00000047067	-1.05275	4.35563e-06	Dusp28	TRUE
ENSMUSG00000031166	-1.051	1.42126e-06	Wdr13	FALSE
ENSMUSG00000054452	-1.05028	1.42126e-06	Aes	TRUE
ENSMUSG00000001227	-1.03867	2.222e-06	Sema6b	FALSE
ENSMUSG00000006218	-1.03731	6.73493e-05	Fam131c	TRUE
ENSMUSG00000014748	-1.03296	1.42126e-06	Tex261	TRUE
ENSMUSG00000042688	-1.03056	3.0285e-06	Mapk6	FALSE
ENSMUSG00000003346	-1.02831	1.42126e-06	Abhd17a	TRUE
ENSMUSG00000018677	-1.02394	1.42126e-06	Slc25a39	FALSE
ENSMUSG00000075284	-1.01951	2.222e-06	Wipf1	FALSE
ENSMUSG00000019132	-1.01625	1.42126e-06	BC005537	TRUE
ENSMUSG00000030556	-1.01579	2.222e-06	Lrrc28	FALSE
ENSMUSG00000059602	-1.01409	0.000394537	Syn3	TRUE
ENSMUSG00000061436	-1.01039	1.42126e-06	Hipk2	TRUE
ENSMUSG00000028538	-1.00944	1.42126e-06	St3gal3	FALSE
ENSMUSG00000033685	-1.00766	4.35563e-06	Ucp2	FALSE
ENSMUSG00000027016	-1.00214	4.35563e-06	Zfp385b	FALSE
ENSMUSG00000033220	-1.00154	1.27207e-05	Rac2	TRUE
ENSMUSG00000018727	-0.999416	6.8769e-05	Cpsf4l	FALSE
ENSMUSG00000018774	-0.9952	7.48806e-06	Cd68	TRUE
ENSMUSG00000000948	-0.992589	1.42126e-06	Snrpn	TRUE
ENSMUSG00000044229	-0.9923	0.0018812	Nxpe4	TRUE
ENSMUSG00000025203	-0.989534	1.42126e-06	Scd2	TRUE
ENSMUSG00000019804	-0.989179	1.42126e-06	Snx3	FALSE
ENSMUSG00000040552	-0.983258	1.42126e-06	C3ar1	TRUE
ENSMUSG00000042439	-0.983191	8.04994e-05	Zfp532	FALSE
ENSMUSG00000029022	-0.981228	2.222e-06	Miip	FALSE
ENSMUSG00000029178	-0.980075	1.42126e-06	Klf3	FALSE
ENSMUSG00000023048	-0.97951	1.42126e-06	Prr13	FALSE
ENSMUSG00000050628	-0.977438	1.42126e-06	Ubald2	TRUE
ENSMUSG00000026087	-0.977016	1.42126e-06	Mrpl30	TRUE
ENSMUSG00000027341	-0.975418	1.42126e-06	Tmem230	FALSE
ENSMUSG00000002083	-0.972859	0.000528818	Bbc3	TRUE
ENSMUSG00000020435	-0.971494	0.000134146	Osbp2	FALSE
ENSMUSG00000005982	-0.970442	1.42126e-06	Naa60	FALSE
ENSMUSG00000050106	-0.96874	0.000341632	Tmc8	TRUE
ENSMUSG00000029860	-0.96771	1.42126e-06	Zyx	FALSE
ENSMUSG00000031834	-0.96605	1.42126e-06	Pik3r2	TRUE
ENSMUSG00000027907	-0.961514	9.60631e-05	S100a11	TRUE
ENSMUSG00000048163	-0.961272	2.02077e-05	Selplg	TRUE
ENSMUSG00000032536	-0.960951	1.42126e-06	Trak1	TRUE
ENSMUSG00000093674	-0.959802	0.00296708	Rpl41	FALSE
ENSMUSG00000071657	-0.959034	1.42126e-06	Bscl2	FALSE
ENSMUSG00000042429	-0.958616	0.000296425	Adora1	FALSE
ENSMUSG00000025786	-0.956393	1.42126e-06	Zdhhc3	FALSE
ENSMUSG00000009687	-0.955817	3.0285e-06	Fxyd5	FALSE
ENSMUSG00000036402	-0.955326	7.48806e-06	Gng12	FALSE
ENSMUSG00000030615	-0.954543	1.42126e-06	Tmem126a	FALSE
ENSMUSG00000049037	-0.948937	3.11162e-05	Clec4a1	TRUE
ENSMUSG00000053716	-0.94435	2.222e-06	Dusp7	TRUE
ENSMUSG00000038418	-0.943237	2.52835e-05	Egr1	FALSE
ENSMUSG00000030753	-0.940928	1.42126e-06	Prkrir	FALSE
ENSMUSG00000056201	-0.939049	1.42126e-06	Cfl1	TRUE
ENSMUSG00000042594	-0.938503	3.80914e-05	Sh2b3	FALSE
ENSMUSG00000054630	-0.93845	1.42126e-06	Ugt2b5	TRUE
ENSMUSG00000033819	-0.93822	2.222e-06	Ppp1r16a	FALSE
ENSMUSG00000003228	-0.937941	4.58716e-05	Grk5	TRUE
ENSMUSG00000020091	-0.936662	1.42126e-06	Eif4ebp2	FALSE
ENSMUSG00000009828	-0.932522	4.35563e-06	Ick	FALSE
ENSMUSG00000037071	-0.931948	1.42126e-06	Scd1	TRUE
ENSMUSG00000069919	-0.931101	5.63004e-06	Hba-a1	TRUE
ENSMUSG00000032735	-0.930453	1.42126e-06	Ablim3	FALSE
ENSMUSG00000028868	-0.930373	1.42126e-06	Wasf2	TRUE
ENSMUSG00000038000	-0.926282	2.222e-06	Acd	TRUE
ENSMUSG00000028600	-0.925967	1.42126e-06	Podn	FALSE
ENSMUSG00000002778	-0.92593	1.42126e-06	Kdelr1	TRUE
ENSMUSG00000032028	-0.925148	9.60631e-05	Nxpe2	FALSE
ENSMUSG00000024621	-0.923729	1.42126e-06	Csf1r	TRUE
ENSMUSG00000020211	-0.922781	1.42126e-06	Sf3a2	FALSE
ENSMUSG00000051984	-0.922009	7.48806e-06	Sec31b	FALSE
ENSMUSG00000035529	-0.920708	1.42126e-06	Prdm4	TRUE
ENSMUSG00000041852	-0.918334	1.42126e-06	Tcf20	FALSE
ENSMUSG00000035356	-0.914032	2.02077e-05	Nfkbiz	TRUE
ENSMUSG00000079003	-0.91053	2.222e-06	Samd1	TRUE
ENSMUSG00000049764	-0.908586	1.42126e-06	Zfp280b	TRUE
ENSMUSG00000002205	-0.908514	1.42126e-06	Vrk3	FALSE
ENSMUSG00000053730	-0.908156	1.42126e-06	Tmem39b	FALSE
ENSMUSG00000033863	-0.905095	1.42126e-06	Klf9	TRUE
ENSMUSG00000038990	-0.90036	5.63004e-06	Cables2	TRUE
ENSMUSG00000073982	-0.899708	1.42126e-06	Rhog	FALSE
ENSMUSG00000057342	-0.898662	1.42126e-06	Sphk2	FALSE
ENSMUSG00000067787	-0.893146	5.63004e-06	Blcap	FALSE
ENSMUSG00000054203	-0.892518	0.00329945	Ifi205	TRUE
ENSMUSG00000049295	-0.892333	2.222e-06	Zfp219	FALSE
ENSMUSG00000024505	-0.891465	0.000456769	Dtwd2	FALSE
ENSMUSG00000020267	-0.891392	1.42126e-06	Hint1	TRUE
ENSMUSG00000022174	-0.890842	1.42126e-06	Dad1	TRUE
ENSMUSG00000030168	-0.89045	1.42126e-06	Adipor2	FALSE
ENSMUSG00000022587	-0.890444	1.42126e-06	Ly6e	FALSE
ENSMUSG00000025377	-0.889568	5.63004e-06	Enthd2	FALSE
ENSMUSG00000078713	-0.889548	1.42126e-06	Tomm5	FALSE
ENSMUSG00000056493	-0.888826	4.35563e-06	Foxk1	TRUE
ENSMUSG00000044147	-0.88823	1.42126e-06	Arf6	TRUE
ENSMUSG00000068299	-0.888151	0.000296425	1700019G17Rik	TRUE
ENSMUSG00000006390	-0.88666	1.42126e-06	Elovl1	FALSE
ENSMUSG00000032245	-0.884255	0.000157729	Cln6	FALSE
ENSMUSG00000052293	-0.88343	2.222e-06	Taf9	FALSE
ENSMUSG00000021486	-0.881493	1.42126e-06	Prelid1	TRUE
ENSMUSG00000035203	-0.880395	1.42126e-06	Epn1	FALSE
ENSMUSG00000041577	-0.87978	4.35563e-06	Prelp	TRUE
ENSMUSG00000033307	-0.879261	1.42126e-06	Mif	TRUE
ENSMUSG00000053483	-0.87911	2.222e-06	Usp21	FALSE
ENSMUSG00000019927	-0.878651	2.222e-06	Ube2d1	TRUE
ENSMUSG00000034664	-0.877486	4.35563e-06	Itga2b	TRUE
ENSMUSG00000073423	-0.876855	6.73493e-05	Zfp414	FALSE
ENSMUSG00000041782	-0.87495	1.42126e-06	Lad1	TRUE
ENSMUSG00000040721	-0.873753	9.81236e-06	Zfhx2	TRUE
ENSMUSG00000019818	-0.873116	1.42126e-06	Cd164	TRUE
ENSMUSG00000096062	-0.873063	0.000296425	Pik3c2g	TRUE
ENSMUSG00000091803	-0.871243	4.35563e-06	Cox16	FALSE
ENSMUSG00000000552	-0.870156	1.27207e-05	Zfp385a	TRUE
ENSMUSG00000026174	-0.869681	1.42126e-06	Rqcd1	TRUE
ENSMUSG00000002489	-0.868589	6.73493e-05	Tiam1	FALSE
ENSMUSG00000046605	-0.868055	0.00146565	B3gntl1	TRUE
ENSMUSG00000046470	-0.867658	3.80914e-05	Sox18	TRUE
ENSMUSG00000028458	-0.866199	1.42126e-06	Tesk1	FALSE
ENSMUSG00000055148	-0.864139	4.58716e-05	Klf2	TRUE
ENSMUSG00000011884	-0.864083	4.35563e-06	Gltp	TRUE
ENSMUSG00000060743	-0.863241	1.42126e-06	H3f3a	FALSE
ENSMUSG00000064358	-0.861238	2.222e-06	mt-Co3	TRUE
ENSMUSG00000057666	-0.86043	1.42126e-06	Gapdh	FALSE
ENSMUSG00000035890	-0.860019	1.42126e-06	Rnf126	TRUE
ENSMUSG00000046792	-0.859689	4.35563e-06	Zfp787	TRUE
ENSMUSG00000021143	-0.859526	1.42126e-06	Pacs2	TRUE
ENSMUSG00000018559	-0.859169	1.42126e-06	Ctdnep1	TRUE
ENSMUSG00000008855	-0.857106	1.42126e-06	Hdac5	FALSE
ENSMUSG00000038013	-0.855274	3.80914e-05	Wipf2	TRUE
ENSMUSG00000028439	-0.853671	8.04994e-05	Fam219a	FALSE
ENSMUSG00000024949	-0.853372	2.222e-06	Sf1	FALSE
ENSMUSG00000020805	-0.853255	0.0027153	Slc13a5	TRUE
ENSMUSG00000058886	-0.853034	1.42126e-06	Deaf1	TRUE
ENSMUSG00000055900	-0.852324	3.0285e-06	Tmem69	TRUE
ENSMUSG00000076441	-0.852212	7.48806e-06	Ass1	TRUE
ENSMUSG00000025732	-0.850506	4.35563e-06	Fam195a	TRUE
ENSMUSG00000073471	-0.850247	1.27207e-05	Rsph3a	TRUE
ENSMUSG00000049555	-0.848808	0.000528818	Tmie	TRUE
ENSMUSG00000062981	-0.846314	1.42126e-06	Mrpl42	TRUE
ENSMUSG00000011831	-0.844484	1.42126e-06	Evi5	TRUE
ENSMUSG00000036854	-0.843367	0.000254206	Hspb6	TRUE
ENSMUSG00000055917	-0.843119	1.42126e-06	Zfp277	FALSE
ENSMUSG00000038375	-0.842751	4.35563e-06	Trp53inp2	FALSE
ENSMUSG00000056602	-0.841782	3.80914e-05	Fry	TRUE
ENSMUSG00000052040	-0.838185	1.42126e-06	Klf13	TRUE
ENSMUSG00000090213	-0.836271	1.42126e-06	Tmem189	TRUE
ENSMUSG00000037621	-0.835496	2.222e-06	Atoh8	TRUE
ENSMUSG00000018415	-0.834593	7.48806e-06	Gid4	FALSE
ENSMUSG00000017721	-0.834254	1.42126e-06	Pigt	TRUE
ENSMUSG00000026239	-0.833879	0.000341632	Pde6d	TRUE
ENSMUSG00000029556	-0.832833	1.42126e-06	Hnf1a	FALSE
ENSMUSG00000010607	-0.831931	0.000134146	Pigyl	FALSE
ENSMUSG00000021661	-0.830983	1.42126e-06	Ankra2	TRUE
ENSMUSG00000071335	-0.828882	1.42126e-06	G630090E17Rik	TRUE
ENSMUSG00000059474	-0.828813	1.42126e-06	Mbtd1	TRUE
ENSMUSG00000017764	-0.82805	3.0285e-06	Zswim1	FALSE
ENSMUSG00000062397	-0.82581	7.48806e-06	Zfp706	TRUE
ENSMUSG00000035545	-0.825096	2.222e-06	Leng8	FALSE
ENSMUSG00000016758	-0.824741	2.52835e-05	Bik	TRUE
ENSMUSG00000037151	-0.824206	0.00452772	Lrrc20	TRUE
ENSMUSG00000028468	-0.822939	1.42126e-06	Rgp1	FALSE
ENSMUSG00000003810	-0.821855	3.0285e-06	Mast2	FALSE
ENSMUSG00000030126	-0.821004	1.42126e-06	Tmcc1	FALSE
ENSMUSG00000003190	-0.819267	1.27207e-05	Bcl2l12	TRUE
ENSMUSG00000034343	-0.816685	1.42126e-06	Ube2f	FALSE
ENSMUSG00000025422	-0.814687	0.000134146	Agap2	TRUE
ENSMUSG00000049606	-0.81315	1.42126e-06	Zfp644	FALSE
ENSMUSG00000043518	-0.813062	0.000394537	Rai2	FALSE
ENSMUSG00000034832	-0.81119	1.42126e-06	Tet3	TRUE
ENSMUSG00000046876	-0.810888	1.42126e-06	Atxn1	FALSE
ENSMUSG00000036835	-0.810704	1.42126e-06	Psenen	TRUE
ENSMUSG00000064354	-0.810641	5.63004e-06	mt-Co2	TRUE
ENSMUSG00000038967	-0.809933	2.222e-06	Pdk2	TRUE
ENSMUSG00000005575	-0.808978	1.42126e-06	Ube2m	FALSE
ENSMUSG00000030847	-0.808691	2.222e-06	Bag3	TRUE
ENSMUSG00000060317	-0.807874	1.42126e-06	Acnat2	FALSE
ENSMUSG00000028565	-0.806783	1.42126e-06	Nfia	FALSE
ENSMUSG00000025868	-0.806136	1.42126e-06	Higd2a	TRUE
ENSMUSG00000027551	-0.806082	2.52835e-05	Zfp64	FALSE
ENSMUSG00000037971	-0.806049	4.35563e-06	1110032A03Rik	FALSE
ENSMUSG00000027936	-0.803355	3.0285e-06	Crtc2	FALSE
ENSMUSG00000061479	-0.800812	3.0285e-06	Snrpa	FALSE
ENSMUSG00000032548	-0.80067	1.42126e-06	Slco2a1	TRUE
ENSMUSG00000020659	-0.799397	2.222e-06	Cbll1	FALSE
ENSMUSG00000024644	-0.798516	1.42126e-06	Cndp2	FALSE
ENSMUSG00000041827	-0.797943	3.0285e-06	Oasl1	FALSE
ENSMUSG00000027394	-0.795885	1.42126e-06	Ttl	TRUE
ENSMUSG00000039910	-0.794773	5.63004e-06	Cited2	TRUE
ENSMUSG00000048279	-0.793832	5.5706e-05	Sacs	TRUE
ENSMUSG00000071649	-0.793796	1.42126e-06	B3gat3	TRUE
ENSMUSG00000030822	-0.793455	1.42126e-06	Prr14	FALSE
ENSMUSG00000039844	-0.793441	1.42126e-06	Rapgef1	FALSE
ENSMUSG00000035367	-0.792175	1.42126e-06	Rmi1	TRUE
ENSMUSG00000004263	-0.789722	1.60627e-05	Atn1	FALSE
ENSMUSG00000042340	-0.787591	1.27207e-05	Ctf1	TRUE
ENSMUSG00000024121	-0.786954	8.04994e-05	Atp6v0c	FALSE
ENSMUSG00000055553	-0.785894	1.42126e-06	Kxd1	TRUE
ENSMUSG00000033623	-0.782986	1.60627e-05	Pcgf3	TRUE
ENSMUSG00000038415	-0.782661	2.52835e-05	Foxq1	TRUE
ENSMUSG00000000149	-0.782038	1.42126e-06	Gna12	TRUE
ENSMUSG00000021594	-0.780791	1.42126e-06	Srd5a1	TRUE
ENSMUSG00000008604	-0.780757	1.42126e-06	Ubqln4	TRUE
ENSMUSG00000001910	-0.779535	1.42126e-06	Nacc1	TRUE
ENSMUSG00000072294	-0.778113	1.42126e-06	Klf12	TRUE
ENSMUSG00000021699	-0.777185	4.35563e-06	Pde4d	FALSE
ENSMUSG00000021967	-0.776321	2.222e-06	Mrp63	TRUE
ENSMUSG00000033022	-0.775433	1.42126e-06	Cdo1	TRUE
ENSMUSG00000064225	-0.773998	1.42126e-06	Paqr9	TRUE
ENSMUSG00000074405	-0.773477	9.81236e-06	Zfp865	TRUE
ENSMUSG00000036241	-0.771735	1.42126e-06	Ube2r2	TRUE
ENSMUSG00000060601	-0.771218	1.42126e-06	Nr1h2	FALSE
ENSMUSG00000025353	-0.770004	1.42126e-06	Ormdl2	TRUE
ENSMUSG00000027983	-0.7699	1.42126e-06	Cyp2u1	TRUE
ENSMUSG00000029715	-0.769836	2.222e-06	Pop7	FALSE
ENSMUSG00000045867	-0.769836	1.42126e-06	Cradd	TRUE
ENSMUSG00000058396	-0.769816	4.35563e-06	Gpr182	TRUE
ENSMUSG00000028744	-0.767114	1.42126e-06	Pqlc2	FALSE
ENSMUSG00000060708	-0.766795	0.000896372	Bloc1s4	TRUE
ENSMUSG00000008398	-0.764441	1.42126e-06	Elk3	FALSE
ENSMUSG00000038127	-0.763352	5.63004e-06	Ccdc50	FALSE
ENSMUSG00000039345	-0.762912	1.42126e-06	Mettl22	TRUE
ENSMUSG00000025010	-0.762086	0.00900894	Ccnj	TRUE
ENSMUSG00000022999	-0.761951	0.000296425	Lmbr1l	FALSE
ENSMUSG00000055720	-0.76073	1.42126e-06	Ubl7	TRUE
ENSMUSG00000054855	-0.759186	2.52835e-05	Rnd1	FALSE
ENSMUSG00000071856	-0.758495	2.222e-06	Mcc	FALSE
ENSMUSG00000027327	-0.758031	0.000296425	1700037H04Rik	FALSE
ENSMUSG00000033487	-0.757769	1.42126e-06	Fndc3a	TRUE
ENSMUSG00000035392	-0.757618	1.42126e-06	Dennd1a	FALSE
ENSMUSG00000028809	-0.75691	1.42126e-06	Srrm1	FALSE
ENSMUSG00000034731	-0.756488	7.48806e-06	Dgkh	TRUE
ENSMUSG00000096054	-0.755788	1.42126e-06	Syne1	TRUE
ENSMUSG00000059772	-0.755588	2.52835e-05	Slx1b	FALSE
ENSMUSG00000026511	-0.75319	1.42126e-06	Srp9	TRUE
ENSMUSG00000026833	-0.752802	2.02077e-05	Olfm1	FALSE
ENSMUSG00000038784	-0.751119	1.42126e-06	Cnot4	FALSE
ENSMUSG00000039244	-0.75082	1.42126e-06	E130309D02Rik	TRUE
ENSMUSG00000000282	-0.748475	5.63004e-06	Mnt	TRUE
ENSMUSG00000034333	-0.747977	0.00166855	Zbed4	TRUE
ENSMUSG00000022871	-0.747653	5.63004e-06	Fetub	FALSE
ENSMUSG00000078578	-0.747438	1.42126e-06	Ube2d3	FALSE
ENSMUSG00000046711	-0.744388	3.80914e-05	Hmga1	FALSE
ENSMUSG00000017664	-0.74414	5.63004e-06	Slc35c2	FALSE
ENSMUSG00000049580	-0.744128	4.35563e-06	Tsku	FALSE
ENSMUSG00000032897	-0.743537	1.42126e-06	Nfyc	FALSE
ENSMUSG00000045248	-0.743071	3.11162e-05	Med26	TRUE
ENSMUSG00000079677	-0.741206	2.222e-06	Fdx1l	TRUE
ENSMUSG00000029723	-0.740936	9.81236e-06	Tsc22d4	TRUE
ENSMUSG00000022505	-0.739649	9.60631e-05	Emp2	TRUE
ENSMUSG00000021252	-0.739023	1.42126e-06	0610007P14Rik	FALSE
ENSMUSG00000021217	-0.738888	0.00541025	Tshz3	TRUE
ENSMUSG00000025270	-0.7386	1.42126e-06	Alas2	FALSE
ENSMUSG00000010406	-0.737762	1.42126e-06	Mrpl52	TRUE
ENSMUSG00000063480	-0.734328	2.222e-06	Nhp2l1	TRUE
ENSMUSG00000031534	-0.733315	2.222e-06	Smim19	TRUE
ENSMUSG00000019731	-0.73313	2.222e-06	Slc35e1	TRUE
ENSMUSG00000068856	-0.732281	1.42126e-06	Sf3b4	TRUE
ENSMUSG00000061650	-0.731705	0.000341632	Med9	TRUE
ENSMUSG00000024042	-0.730865	1.42126e-06	Sik1	TRUE
ENSMUSG00000044250	-0.730367	0.00900894	Pced1b	TRUE
ENSMUSG00000034908	-0.728252	1.42126e-06	Sidt2	FALSE
ENSMUSG00000028755	-0.728178	5.63004e-06	Cda	TRUE
ENSMUSG00000027466	-0.727908	1.42126e-06	Rbck1	FALSE
ENSMUSG00000033021	-0.727837	1.42126e-06	Gmppa	FALSE
ENSMUSG00000037583	-0.727388	1.42126e-06	Nr0b2	TRUE
ENSMUSG00000036073	-0.727282	1.42126e-06	Galt	FALSE
ENSMUSG00000008999	-0.726905	4.58716e-05	Bmp7	TRUE
ENSMUSG00000005674	-0.726637	5.5706e-05	Tomm40l	FALSE
ENSMUSG00000018678	-0.725585	0.000601391	Sp2	FALSE
ENSMUSG00000026832	-0.723469	5.5706e-05	Cytip	TRUE
ENSMUSG00000004994	-0.722494	4.35563e-06	Ccdc130	FALSE
ENSMUSG00000059248	-0.721972	1.42126e-06	2009-09-01	FALSE
ENSMUSG00000056851	-0.720659	2.222e-06	Pcbp2	FALSE
ENSMUSG00000007817	-0.720447	1.60627e-05	Zmiz1	FALSE
ENSMUSG00000051652	-0.718546	5.63004e-06	Lrrc3	TRUE
ENSMUSG00000026921	-0.718493	9.81236e-06	Egfl7	FALSE
ENSMUSG00000000134	-0.718491	1.42126e-06	Tfe3	FALSE
ENSMUSG00000020423	-0.718186	3.0285e-06	Btg2	TRUE
ENSMUSG00000058818	-0.718072	4.58716e-05	Pirb	TRUE
ENSMUSG00000020261	-0.717827	2.222e-06	Slc36a1	FALSE
ENSMUSG00000026925	-0.71625	1.42126e-06	Inpp5e	FALSE
ENSMUSG00000023915	-0.716221	1.42126e-06	Tnfrsf21	TRUE
ENSMUSG00000024985	-0.71618	0.000134146	Tcf7l2	FALSE
ENSMUSG00000048832	-0.715641	1.42126e-06	Vps37c	TRUE
ENSMUSG00000036840	-0.714712	8.04994e-05	Siah1a	TRUE
ENSMUSG00000007872	-0.714512	1.42126e-06	Id3	TRUE
ENSMUSG00000020889	-0.713988	9.60631e-05	Nr1d1	TRUE
ENSMUSG00000036299	-0.713091	1.42126e-06	BC031181	TRUE
ENSMUSG00000020053	-0.712146	4.35563e-06	Igf1	FALSE
ENSMUSG00000031681	-0.712	1.42126e-06	Smad1	TRUE
ENSMUSG00000037003	-0.710806	1.42126e-06	Tenc1	FALSE
ENSMUSG00000005087	-0.710621	2.02077e-05	Cd44	FALSE
ENSMUSG00000036002	-0.710274	4.58716e-05	Fam214b	FALSE
ENSMUSG00000024050	-0.709049	5.63004e-06	Wiz	FALSE
ENSMUSG00000032606	-0.708451	2.222e-06	Nicn1	TRUE
ENSMUSG00000033763	-0.708405	0.0018812	Mtss1l	TRUE
ENSMUSG00000047215	-0.705763	5.63004e-06	Rpl9	TRUE
ENSMUSG00000030610	-0.705	1.27207e-05	Det1	TRUE
ENSMUSG00000038781	-0.704368	2.222e-06	Stap2	TRUE
ENSMUSG00000079469	-0.704325	1.42126e-06	Pigb	TRUE
ENSMUSG00000063704	-0.704209	9.81236e-06	Mapk15	TRUE
ENSMUSG00000050144	-0.703901	1.42126e-06	Slc25a44	FALSE
ENSMUSG00000032528	-0.703816	0.000896372	Vipr1	TRUE
ENSMUSG00000039431	-0.702394	3.11162e-05	Mtmr7	FALSE
ENSMUSG00000098274	-0.701915	1.42126e-06	RPL24	TRUE
ENSMUSG00000096768	-0.701656	0.00901348	Erdr1	FALSE
ENSMUSG00000031216	-0.701363	1.42126e-06	Stard8	FALSE
ENSMUSG00000035765	-0.700922	1.42126e-06	Dym	TRUE
ENSMUSG00000002055	-0.700748	0.00822245	Spag5	TRUE
ENSMUSG00000042632	-0.700534	1.42126e-06	Pla2g6	FALSE
ENSMUSG00000003949	-0.700089	1.42126e-06	Hlf	TRUE
ENSMUSG00000031665	-0.70003	1.42126e-06	Sall1	TRUE
ENSMUSG00000078765	-0.699579	6.73493e-05	U2af1l4	FALSE
ENSMUSG00000053641	-0.698491	1.42126e-06	Dennd4a	TRUE
ENSMUSG00000062619	-0.697249	5.63004e-06	2310039H08Rik	TRUE
ENSMUSG00000070808	-0.69486	0.000114592	Gltscr1	TRUE
ENSMUSG00000016028	-0.694116	4.35563e-06	Celsr1	TRUE
ENSMUSG00000016637	-0.693346	1.42126e-06	Ift27	TRUE
ENSMUSG00000029684	-0.692468	1.42126e-06	Wasl	TRUE
ENSMUSG00000048175	-0.691373	1.42126e-06	Asb8	FALSE
ENSMUSG00000056211	-0.691295	1.42126e-06	R3hdm1	TRUE
ENSMUSG00000068686	-0.690425	5.5706e-05	Cd59b	FALSE
ENSMUSG00000034158	-0.689166	1.42126e-06	Lrrc58	TRUE
ENSMUSG00000037904	-0.689165	8.04994e-05	Ankrd9	FALSE
ENSMUSG00000009569	-0.689026	2.52835e-05	Mkl2	FALSE
ENSMUSG00000039853	-0.688317	2.222e-06	Trim14	FALSE
ENSMUSG00000021366	-0.687274	1.42126e-06	Hivep1	TRUE
ENSMUSG00000063760	-0.68715	4.35563e-06	Rnf217	TRUE
ENSMUSG00000059851	-0.686779	7.48806e-06	Suv420h2	FALSE
ENSMUSG00000003813	-0.68638	1.42126e-06	Rad23a	TRUE
ENSMUSG00000068758	-0.685365	0.00602989	Il3ra	TRUE
ENSMUSG00000047264	-0.685014	2.02077e-05	Zfp358	TRUE
ENSMUSG00000026814	-0.683252	4.35563e-06	Eng	FALSE
ENSMUSG00000046070	-0.683153	2.222e-06	Igfals	TRUE
ENSMUSG00000053293	-0.682941	0.000157729	Pom121	TRUE
ENSMUSG00000030123	-0.681925	2.222e-06	Plxnd1	TRUE
ENSMUSG00000022472	-0.681266	2.52835e-05	Desi1	FALSE
ENSMUSG00000031796	-0.680887	1.42126e-06	Gtl3	TRUE
ENSMUSG00000044468	-0.680599	1.42126e-06	Fam46c	TRUE
ENSMUSG00000029614	-0.679618	2.52835e-05	Rpl6	TRUE
ENSMUSG00000084883	-0.677435	3.0285e-06	Ccdc85c	TRUE
ENSMUSG00000036442	-0.676902	1.42126e-06	Thap11	TRUE
ENSMUSG00000017950	-0.675978	1.42126e-06	Hnf4a	FALSE
ENSMUSG00000035621	-0.675382	1.42126e-06	Midn	FALSE
ENSMUSG00000034120	-0.674137	3.0285e-06	Srsf2	FALSE
ENSMUSG00000045268	-0.673771	2.02077e-05	Zfp691	FALSE
ENSMUSG00000032403	-0.673707	1.60627e-05	2300009A05Rik	TRUE
ENSMUSG00000021624	-0.673536	0.000341632	Cd180	TRUE
ENSMUSG00000009076	-0.673087	9.81236e-06	Zmat5	TRUE
ENSMUSG00000046138	-0.672944	1.60627e-05	9930021J03Rik	FALSE
ENSMUSG00000027490	-0.672573	0.00265341	E2f1	FALSE
ENSMUSG00000063382	-0.672277	2.222e-06	Bcl9l	TRUE
ENSMUSG00000022615	-0.671801	5.63004e-06	Tymp	TRUE
ENSMUSG00000039384	-0.671586	0.00131431	Dusp10	TRUE
ENSMUSG00000052423	-0.67156	4.58716e-05	B4galt3	FALSE
ENSMUSG00000001445	-0.671381	1.42126e-06	Mrpl10	FALSE
ENSMUSG00000046404	-0.670662	3.0285e-06	Yod1	TRUE
ENSMUSG00000070002	-0.670295	3.0285e-06	Ell	TRUE
ENSMUSG00000035476	-0.669121	4.58716e-05	Tab3	FALSE
ENSMUSG00000032198	-0.66888	1.42126e-06	Dock6	TRUE
ENSMUSG00000039849	-0.66881	1.42126e-06	Pcif1	TRUE
ENSMUSG00000021282	-0.668391	1.42126e-06	Eif5	FALSE
ENSMUSG00000034850	-0.668271	1.42126e-06	Tmem127	TRUE
ENSMUSG00000069917	-0.667424	8.04994e-05	Hba-a2	TRUE
ENSMUSG00000030199	-0.666064	1.42126e-06	Etv6	TRUE
ENSMUSG00000040415	-0.665764	0.000787866	Dtx3	FALSE
ENSMUSG00000051550	-0.665748	0.00677826	Zfp579	FALSE
ENSMUSG00000001844	-0.665713	0.000296425	Zdhhc4	FALSE
ENSMUSG00000039601	-0.665331	0.000157729	Rcan2	FALSE
ENSMUSG00000017376	-0.665115	1.42126e-06	Nlk	FALSE
ENSMUSG00000032254	-0.664968	0.000394537	Kif23	TRUE
ENSMUSG00000072825	-0.664845	1.42126e-06	Cep170b	FALSE
ENSMUSG00000026755	-0.664619	1.42126e-06	Arpc5l	FALSE
ENSMUSG00000038346	-0.664566	1.42126e-06	Zfp384	TRUE
ENSMUSG00000070003	-0.664228	0.00166855	Ssbp4	TRUE
ENSMUSG00000025521	-0.663313	4.35563e-06	Tmem192	FALSE
ENSMUSG00000034254	-0.663195	4.35563e-06	Agpat1	FALSE
ENSMUSG00000031586	-0.661129	1.42126e-06	Rbpms	FALSE
ENSMUSG00000002409	-0.661093	2.222e-06	Dyrk1b	FALSE
ENSMUSG00000036820	-0.660907	4.35563e-06	Amdhd2	FALSE
ENSMUSG00000006498	-0.660865	1.42126e-06	Ptbp1	FALSE
ENSMUSG00000023452	-0.660724	0.000134146	Pisd	FALSE
ENSMUSG00000038827	-0.660636	0.000601391	BC026590	FALSE
ENSMUSG00000024235	-0.660602	0.000394537	Map3k8	TRUE
ENSMUSG00000040188	-0.660182	1.42126e-06	Scamp2	TRUE
ENSMUSG00000040479	-0.660105	1.42126e-06	Dgkz	FALSE
ENSMUSG00000073600	-0.659613	9.81236e-06	Prob1	TRUE
ENSMUSG00000028799	-0.658502	0.00987574	Zfp362	TRUE
ENSMUSG00000020821	-0.658321	4.35563e-06	Kif1c	FALSE
ENSMUSG00000015776	-0.657616	9.81236e-06	Med22	FALSE
ENSMUSG00000025555	-0.656797	1.42126e-06	Farp1	TRUE
ENSMUSG00000038502	-0.655269	1.42126e-06	Ptov1	FALSE
ENSMUSG00000040093	-0.654925	2.52835e-05	Bmf	FALSE
ENSMUSG00000022390	-0.654761	1.42126e-06	Zc3h7b	TRUE
ENSMUSG00000014550	-0.653128	5.63004e-06	Zfyve20	TRUE
ENSMUSG00000004798	-0.651324	1.42126e-06	Ulk2	TRUE
ENSMUSG00000090000	-0.649329	0.000157729	Ier3ip1	TRUE
ENSMUSG00000015085	-0.648999	0.000134146	Entpd2	TRUE
ENSMUSG00000026749	-0.648787	2.222e-06	Nek6	FALSE
ENSMUSG00000026436	-0.64861	1.42126e-06	Elk4	FALSE
ENSMUSG00000006471	-0.648514	9.81236e-06	Ndor1	FALSE
ENSMUSG00000069305	-0.648254	1.60627e-05	Hist1h4n	TRUE
ENSMUSG00000024220	-0.648062	0.00021798	Zfp523	FALSE
ENSMUSG00000037992	-0.647962	3.0285e-06	Rara	FALSE
ENSMUSG00000030137	-0.646943	0.00367797	Tuba8	TRUE
ENSMUSG00000032089	-0.646835	0.000394537	Il10ra	FALSE
ENSMUSG00000020935	-0.645976	1.27207e-05	Dcakd	TRUE
ENSMUSG00000030802	-0.645621	1.42126e-06	Bckdk	FALSE
ENSMUSG00000038593	-0.645025	0.000296425	Tctn1	FALSE
ENSMUSG00000042377	-0.644686	5.5706e-05	Fam83g	TRUE
ENSMUSG00000010936	-0.644664	1.42126e-06	Vac14	TRUE
ENSMUSG00000042292	-0.644594	1.27207e-05	Mkl1	FALSE
ENSMUSG00000055980	-0.644304	4.35563e-06	Irs1	TRUE
ENSMUSG00000056938	-0.643798	0.000185664	Acbd4	FALSE
ENSMUSG00000029417	-0.643761	0.00101816	Cxcl9	TRUE
ENSMUSG00000024213	-0.643247	4.35563e-06	Nudt3	TRUE
ENSMUSG00000041740	-0.643239	1.42126e-06	Rnf10	FALSE
ENSMUSG00000045435	-0.64195	4.35563e-06	Tmem60	TRUE
ENSMUSG00000030431	-0.641403	0.000254206	Tmem238	TRUE
ENSMUSG00000034449	-0.641372	4.35563e-06	Dhrs11	FALSE
ENSMUSG00000030682	-0.640557	1.42126e-06	Cdipt	TRUE
ENSMUSG00000030509	-0.639948	7.48806e-06	Asb7	FALSE
ENSMUSG00000079437	-0.639622	1.42126e-06	Tmem179b	TRUE
ENSMUSG00000015846	-0.638487	1.42126e-06	Rxra	FALSE
ENSMUSG00000060166	-0.637481	0.000157729	Zdhhc8	TRUE
ENSMUSG00000034248	-0.637313	1.42126e-06	Slc25a37	FALSE
ENSMUSG00000032398	-0.636584	3.80914e-05	Snapc5	TRUE
ENSMUSG00000058454	-0.634631	2.222e-06	Dhcr7	FALSE
ENSMUSG00000072115	-0.634293	5.5706e-05	Ang	FALSE
ENSMUSG00000022412	-0.633042	9.81236e-06	Mief1	FALSE
ENSMUSG00000023991	-0.632674	1.42126e-06	Foxp4	TRUE
ENSMUSG00000025498	-0.632003	7.48806e-06	Irf7	TRUE
ENSMUSG00000001128	-0.631699	6.73493e-05	Cfp	TRUE
ENSMUSG00000047656	-0.631214	0.000601391	Trpt1	TRUE
ENSMUSG00000022215	-0.629913	5.63004e-06	Fitm1	TRUE
ENSMUSG00000026245	-0.629182	1.42126e-06	Farsb	FALSE
ENSMUSG00000071076	-0.628974	4.35563e-06	Jund	TRUE
ENSMUSG00000034771	-0.628782	0.000134146	Tle2	TRUE
ENSMUSG00000025226	-0.627676	5.5706e-05	Fbxl15	FALSE
ENSMUSG00000015605	-0.62758	4.35563e-06	Srf	TRUE
ENSMUSG00000089876	-0.626635	1.27207e-05	Tmem102	TRUE
ENSMUSG00000043964	-0.626595	4.58716e-05	Orai3	TRUE
ENSMUSG00000053094	-0.626551	1.42126e-06	Tmem248	FALSE
ENSMUSG00000040712	-0.626031	1.42126e-06	Camta2	FALSE
ENSMUSG00000038342	-0.624451	0.000341632	Mlxip	FALSE
ENSMUSG00000030990	-0.623795	1.60627e-05	Pgap2	FALSE
ENSMUSG00000032182	-0.622705	2.222e-06	Yipf2	FALSE
ENSMUSG00000064351	-0.622661	0.000254206	mt-Co1	TRUE
ENSMUSG00000022960	-0.620751	0.000134146	Donson	FALSE
ENSMUSG00000027875	-0.620678	1.42126e-06	Hmgcs2	FALSE
ENSMUSG00000032300	-0.620358	2.222e-06	1700017B05Rik	TRUE
ENSMUSG00000025207	-0.619967	1.42126e-06	Sema4g	FALSE
ENSMUSG00000018604	-0.619582	1.42126e-06	Tbx3	FALSE
ENSMUSG00000037216	-0.619104	4.35563e-06	Lipt1	FALSE
ENSMUSG00000031902	-0.616062	2.222e-06	Nfatc3	TRUE
ENSMUSG00000024260	-0.615571	5.63004e-06	Sap130	FALSE
ENSMUSG00000021228	-0.614751	0.000296425	Acot3	FALSE
ENSMUSG00000030087	-0.61422	2.222e-06	Klf15	FALSE
ENSMUSG00000039117	-0.613919	6.73493e-05	Taf4a	TRUE
ENSMUSG00000025171	-0.612617	0.00296708	Ubtd1	TRUE
ENSMUSG00000055862	-0.612453	1.60627e-05	Izumo4	TRUE
ENSMUSG00000066278	-0.611967	3.11162e-05	Vps37b	TRUE
ENSMUSG00000039834	-0.611834	3.11162e-05	Zfp335	TRUE
ENSMUSG00000032081	-0.611631	7.48806e-06	Apoc3	TRUE
ENSMUSG00000027953	-0.610582	1.42126e-06	Slc50a1	TRUE
ENSMUSG00000003345	-0.610551	2.222e-06	Csnk1g2	FALSE
ENSMUSG00000003575	-0.610077	0.00101816	Crtc1	TRUE
ENSMUSG00000051557	-0.608957	0.000134146	Pusl1	TRUE
ENSMUSG00000046671	-0.608404	1.42126e-06	Mtfr1l	FALSE
ENSMUSG00000045282	-0.608345	1.42126e-06	Tmem86b	TRUE
ENSMUSG00000042520	-0.607866	1.42126e-06	Ubap2l	FALSE
ENSMUSG00000066440	-0.607784	1.42126e-06	Zfyve26	TRUE
ENSMUSG00000022698	-0.607729	5.63004e-06	Naa50	FALSE
ENSMUSG00000042423	-0.607716	9.60631e-05	Fbrs	TRUE
ENSMUSG00000013495	-0.607293	1.42126e-06	Tmem175	FALSE
ENSMUSG00000057933	-0.6065	1.60627e-05	Gsta2	FALSE
ENSMUSG00000007892	-0.605011	0.000394537	Rplp1	TRUE
ENSMUSG00000032238	-0.604796	1.42126e-06	Rora	FALSE
ENSMUSG00000044709	-0.604106	9.60631e-05	Gemin7	TRUE
ENSMUSG00000073490	-0.604099	0.000341632	AI607873	TRUE
ENSMUSG00000027602	-0.603759	1.42126e-06	Map1lc3a	TRUE
ENSMUSG00000002968	-0.603397	1.42126e-06	Med25	TRUE
ENSMUSG00000057789	-0.602568	8.04994e-05	Bak1	FALSE
ENSMUSG00000028062	-0.602091	2.222e-06	Lamtor2	TRUE
ENSMUSG00000007777	-0.601327	3.0285e-06	0610009B22Rik	FALSE
ENSMUSG00000006456	-0.600626	3.80914e-05	Rbm14	TRUE
ENSMUSG00000042404	-0.600603	0.000185664	Dennd4b	FALSE
ENSMUSG00000021607	-0.600385	1.60627e-05	Mrpl36	TRUE
ENSMUSG00000029518	-0.599493	1.42126e-06	Rab35	FALSE
ENSMUSG00000037905	-0.599487	1.27207e-05	Bri3bp	TRUE
ENSMUSG00000040699	-0.59877	1.42126e-06	Limd2	FALSE
ENSMUSG00000034880	-0.598753	2.222e-06	Mrpl34	TRUE
ENSMUSG00000079002	-0.598411	1.60627e-05	C030006K11Rik	TRUE
ENSMUSG00000037606	-0.598373	0.000157729	Osbpl5	TRUE
ENSMUSG00000022508	-0.597099	3.80914e-05	Bcl6	TRUE
ENSMUSG00000025733	-0.596723	1.42126e-06	Rhot2	TRUE
ENSMUSG00000005107	-0.596619	1.42126e-06	Slc2a9	FALSE
ENSMUSG00000014592	-0.596151	0.00613818	Camta1	FALSE
ENSMUSG00000025920	-0.595952	1.27207e-05	Stau2	FALSE
ENSMUSG00000030555	-0.594454	1.42126e-06	Ttc23	TRUE
ENSMUSG00000032349	-0.59422	1.42126e-06	Elovl5	TRUE
ENSMUSG00000029528	-0.593712	1.42126e-06	Pxn	FALSE
ENSMUSG00000028398	-0.592118	4.35563e-06	Tmem261	TRUE
ENSMUSG00000024875	-0.591019	1.42126e-06	Yif1a	TRUE
ENSMUSG00000037921	-0.590998	0.000689159	Ddx60	FALSE
ENSMUSG00000022564	-0.589115	1.42126e-06	Grina	TRUE
ENSMUSG00000045294	-0.589111	1.42126e-06	Insig1	TRUE
ENSMUSG00000022463	-0.588954	3.0285e-06	Srebf2	TRUE
ENSMUSG00000072872	-0.588899	0.000896372	Rybp	TRUE
ENSMUSG00000027286	-0.588429	9.81236e-06	Lrrc57	FALSE
ENSMUSG00000015120	-0.588245	1.42126e-06	Ube2i	FALSE
ENSMUSG00000090231	-0.587576	1.42126e-06	Cfb	TRUE
ENSMUSG00000028266	-0.587407	5.63004e-06	Lmo4	FALSE
ENSMUSG00000023020	-0.587222	3.80914e-05	Cox14	TRUE
ENSMUSG00000020101	-0.587016	0.000254206	4632428N05Rik	TRUE
ENSMUSG00000001229	-0.586953	1.42126e-06	Dpp9	TRUE
ENSMUSG00000062762	-0.586773	2.222e-06	Ei24	FALSE
ENSMUSG00000025027	-0.58655	2.52835e-05	Xpnpep1	TRUE
ENSMUSG00000049086	-0.58634	0.000524847	Bmyc	TRUE
ENSMUSG00000032578	-0.586243	0.000254206	Cish	TRUE
ENSMUSG00000005621	-0.586133	2.222e-06	Zfp592	TRUE
ENSMUSG00000068264	-0.585313	1.42126e-06	Ap5s1	FALSE
ENSMUSG00000047371	-0.585121	2.222e-06	Zfp768	TRUE
ENSMUSG00000025785	0.586118	2.222e-06	Exosc7	TRUE
ENSMUSG00000079362	0.586248	0.00329945	Gbp6	TRUE
ENSMUSG00000037470	0.586383	1.42126e-06	Uggt1	FALSE
ENSMUSG00000052776	0.586479	4.35563e-06	Oas1a	TRUE
ENSMUSG00000004319	0.586744	1.42126e-06	Clcn3	TRUE
ENSMUSG00000025464	0.586799	1.42126e-06	Paox	TRUE
ENSMUSG00000029670	0.587564	1.42126e-06	Ing3	FALSE
ENSMUSG00000043061	0.588739	0.000689159	Tmem18	TRUE
ENSMUSG00000031843	0.588758	0.00329945	Mphosph6	TRUE
ENSMUSG00000078670	0.589624	0.00613818	Fam174b	TRUE
ENSMUSG00000021290	0.591395	5.5706e-05	2010107E04Rik	TRUE
ENSMUSG00000024218	0.591838	0.000134146	Taf11	TRUE
ENSMUSG00000031387	0.592006	9.81236e-06	Renbp	FALSE
ENSMUSG00000053846	0.592327	0.00367797	Lipg	TRUE
ENSMUSG00000031314	0.595501	1.42126e-06	Taf1	FALSE
ENSMUSG00000057722	0.597159	2.52835e-05	Lepr	FALSE
ENSMUSG00000060147	0.597167	1.42126e-06	Serpinb6a	FALSE
ENSMUSG00000032560	0.598066	1.42126e-06	Dnajc13	TRUE
ENSMUSG00000038301	0.598231	1.60627e-05	Snx10	FALSE
ENSMUSG00000048332	0.599042	5.5706e-05	Lhfp	FALSE
ENSMUSG00000022299	0.599155	7.48806e-06	Slc25a32	TRUE
ENSMUSG00000023046	0.599697	0.0023655	Igfbp6	TRUE
ENSMUSG00000017756	0.599738	1.42126e-06	Slc12a7	TRUE
ENSMUSG00000025193	0.600258	2.222e-06	Cutc	FALSE
ENSMUSG00000031198	0.600499	5.5706e-05	Fundc2	TRUE
ENSMUSG00000018697	0.600653	1.42126e-06	Aatf	TRUE
ENSMUSG00000028256	0.600989	1.60627e-05	Odf2l	FALSE
ENSMUSG00000022822	0.601169	1.42126e-06	Abcc5	FALSE
ENSMUSG00000046434	0.601905	1.42126e-06	Hnrnpa1	FALSE
ENSMUSG00000020315	0.602006	2.222e-06	Sptbn1	FALSE
ENSMUSG00000025934	0.602046	1.42126e-06	Gsta3	FALSE
ENSMUSG00000074824	0.602173	0.000296425	Rslcan18	TRUE
ENSMUSG00000031838	0.60225	1.42126e-06	Ifi30	TRUE
ENSMUSG00000026311	0.605034	0.0018812	Asb1	FALSE
ENSMUSG00000032679	0.606063	1.42126e-06	Cd59a	TRUE
ENSMUSG00000026042	0.606205	2.222e-06	Col5a2	TRUE
ENSMUSG00000021520	0.606639	2.02077e-05	Uqcrb	TRUE
ENSMUSG00000042406	0.606749	4.35563e-06	Atf4	TRUE
ENSMUSG00000022434	0.607203	0.000524847	Fam118a	TRUE
ENSMUSG00000050379	0.607723	0.000157729	2006-09-01	TRUE
ENSMUSG00000036103	0.609596	1.42126e-06	Colec12	TRUE
ENSMUSG00000074890	0.610164	1.27207e-05	Lcmt2	FALSE
ENSMUSG00000041891	0.610559	1.42126e-06	Lman1	FALSE
ENSMUSG00000024236	0.611907	1.42126e-06	Svil	FALSE
ENSMUSG00000026803	0.612163	5.63004e-06	Ttf1	TRUE
ENSMUSG00000063450	0.615673	5.63004e-06	Syne2	TRUE
ENSMUSG00000031465	0.616408	0.000394537	Angpt2	TRUE
ENSMUSG00000034424	0.618254	1.42126e-06	Gcsh	TRUE
ENSMUSG00000039523	0.61918	9.81236e-06	Cep104	TRUE
ENSMUSG00000054150	0.619541	0.000157729	Syne3	FALSE
ENSMUSG00000029328	0.620184	2.222e-06	Hnrnpdl	FALSE
ENSMUSG00000025809	0.62038	1.42126e-06	Itgb1	FALSE
ENSMUSG00000025264	0.620813	1.42126e-06	Tsr2	FALSE
ENSMUSG00000048200	0.621041	0.000157729	Efcab4a	FALSE
ENSMUSG00000044328	0.621471	0.000341632	Trp53i13	TRUE
ENSMUSG00000033739	0.623849	5.63004e-06	Fkbpl	TRUE
ENSMUSG00000058655	0.625013	1.42126e-06	Eif4b	TRUE
ENSMUSG00000063888	0.62519	1.42126e-06	Rpl7l1	TRUE
ENSMUSG00000022875	0.625685	0.00900894	Kng1	FALSE
ENSMUSG00000033792	0.627276	1.42126e-06	Atp7a	TRUE
ENSMUSG00000036083	0.629406	1.42126e-06	Slc17a3	FALSE
ENSMUSG00000067194	0.62992	2.02077e-05	Eif1ax	TRUE
ENSMUSG00000031954	0.630854	2.222e-06	Cfdp1	TRUE
ENSMUSG00000029767	0.631846	1.42126e-06	Calu	FALSE
ENSMUSG00000020120	0.632437	0.000689159	Plek	TRUE
ENSMUSG00000033808	0.633602	1.42126e-06	Tmem87a	FALSE
ENSMUSG00000025175	0.634299	3.0285e-06	Fn3k	FALSE
ENSMUSG00000034485	0.634427	1.42126e-06	Uaca	TRUE
ENSMUSG00000036438	0.635155	1.42126e-06	Calm2	TRUE
ENSMUSG00000052906	0.63617	2.222e-06	Ubxn8	TRUE
ENSMUSG00000039634	0.636252	4.58716e-05	Zfp189	FALSE
ENSMUSG00000020334	0.636449	1.60627e-05	Slc22a4	TRUE
ENSMUSG00000036309	0.638056	2.222e-06	Skp1a	FALSE
ENSMUSG00000031393	0.638117	1.27207e-05	Mecp2	FALSE
ENSMUSG00000038372	0.63877	1.27207e-05	Gmds	TRUE
ENSMUSG00000004945	0.638793	1.42126e-06	Tmem242	TRUE
ENSMUSG00000022109	0.640108	1.42126e-06	Med4	TRUE
ENSMUSG00000040605	0.641269	0.00021798	Bace2	TRUE
ENSMUSG00000020914	0.641376	1.42126e-06	Top2a	TRUE
ENSMUSG00000020212	0.641812	0.0040761	Mdm1	FALSE
ENSMUSG00000030960	0.642515	0.000254206	Mettl10	TRUE
ENSMUSG00000027597	0.643254	1.42126e-06	Ahcy	TRUE
ENSMUSG00000024384	0.644201	2.222e-06	Iws1	TRUE
ENSMUSG00000029402	0.645201	9.81236e-06	Snrnp35	FALSE
ENSMUSG00000003039	0.645535	2.222e-06	Fam32a	TRUE
ENSMUSG00000032582	0.646523	1.42126e-06	Rbm6	FALSE
ENSMUSG00000028713	0.646762	1.42126e-06	Cyp4b1	FALSE
ENSMUSG00000035235	0.648964	0.00746027	Trim13	FALSE
ENSMUSG00000028289	0.64909	1.42126e-06	Epha7	FALSE
ENSMUSG00000022973	0.651791	9.81236e-06	Synj1	TRUE
ENSMUSG00000059981	0.652515	1.42126e-06	Taok2	FALSE
ENSMUSG00000038497	0.653784	1.42126e-06	Tmco3	TRUE
ENSMUSG00000039307	0.655003	0.000689159	Hexdc	TRUE
ENSMUSG00000044674	0.655307	4.35563e-06	Fzd1	TRUE
ENSMUSG00000030983	0.655738	1.42126e-06	Bccip	TRUE
ENSMUSG00000024991	0.656403	1.42126e-06	Eif3a	TRUE
ENSMUSG00000021413	0.660606	1.42126e-06	Prpf4b	TRUE
ENSMUSG00000015224	0.66242	0.00021798	Cyp2j9	TRUE
ENSMUSG00000025092	0.663888	0.000185664	Hspa12a	TRUE
ENSMUSG00000029368	0.663905	0.00265341	Alb	TRUE
ENSMUSG00000031984	0.665203	1.42126e-06	2810004N23Rik	TRUE
ENSMUSG00000026047	0.66678	5.63004e-06	Kdelc1	FALSE
ENSMUSG00000028464	0.667493	3.11162e-05	Tpm2	TRUE
ENSMUSG00000024222	0.668373	1.42126e-06	Fkbp5	FALSE
ENSMUSG00000029781	0.670834	1.42126e-06	Fkbp9	TRUE
ENSMUSG00000052407	0.671058	4.35563e-06	Ccdc171	FALSE
ENSMUSG00000026162	0.671349	6.73493e-05	Nhej1	TRUE
ENSMUSG00000079334	0.671636	0.000341632	Nat6	FALSE
ENSMUSG00000024247	0.671777	9.60631e-05	Pkdcc	TRUE
ENSMUSG00000078427	0.673803	1.42126e-06	Sarnp	TRUE
ENSMUSG00000079435	0.673909	1.42126e-06	Rpl36a	FALSE
ENSMUSG00000029103	0.674384	1.42126e-06	Lrpap1	TRUE
ENSMUSG00000024044	0.675207	1.42126e-06	Epb4.1l3	FALSE
ENSMUSG00000026578	0.675417	2.02077e-05	Ccdc181	TRUE
ENSMUSG00000051497	0.677344	1.42126e-06	Kcnj16	FALSE
ENSMUSG00000027800	0.67882	1.42126e-06	Tm4sf1	TRUE
ENSMUSG00000030744	0.679783	1.42126e-06	Rps3	TRUE
ENSMUSG00000037601	0.680586	1.42126e-06	Nme1	FALSE
ENSMUSG00000022090	0.682491	0.00503089	Pdlim2	FALSE
ENSMUSG00000060703	0.6839	1.42126e-06	Cd302	FALSE
ENSMUSG00000038976	0.684553	3.11162e-05	Ppp1r9b	TRUE
ENSMUSG00000074093	0.684568	0.000601391	Svip	TRUE
ENSMUSG00000001435	0.685763	1.42126e-06	Col18a1	TRUE
ENSMUSG00000000276	0.687319	0.000157729	Dgke	FALSE
ENSMUSG00000025491	0.688072	1.27207e-05	Ifitm1	FALSE
ENSMUSG00000003038	0.689766	1.27207e-05	Hmgn2	FALSE
ENSMUSG00000024713	0.69061	1.42126e-06	Pcsk5	FALSE
ENSMUSG00000038975	0.692853	1.42126e-06	Rabggtb	FALSE
ENSMUSG00000021537	0.693541	4.35563e-06	Cetn3	TRUE
ENSMUSG00000010362	0.694535	4.35563e-06	Rdm1	FALSE
ENSMUSG00000018102	0.696354	0.000134146	Hist1h2bc	TRUE
ENSMUSG00000024248	0.696448	4.35563e-06	Cox7a2l	FALSE
ENSMUSG00000030671	0.697171	1.42126e-06	Pde3b	TRUE
ENSMUSG00000063362	0.697627	1.42126e-06	Alg11	FALSE
ENSMUSG00000009030	0.69858	1.42126e-06	Pdcl	FALSE
ENSMUSG00000041124	0.698895	1.42126e-06	Msantd4	TRUE
ENSMUSG00000032525	0.700346	2.222e-06	Nktr	FALSE
ENSMUSG00000039208	0.703116	8.04994e-05	Metrnl	FALSE
ENSMUSG00000019122	0.7036	0.00211136	Ccl9	TRUE
ENSMUSG00000071415	0.704077	2.222e-06	Rpl23	FALSE
ENSMUSG00000021765	0.708047	2.222e-06	Fst	TRUE
ENSMUSG00000098789	0.708326	0.00746027	Jmjd7	TRUE
ENSMUSG00000029279	0.710159	0.00746027	Brdt	TRUE
ENSMUSG00000021477	0.711005	1.42126e-06	Ctsl	TRUE
ENSMUSG00000069456	0.711994	1.42126e-06	Rdh16	FALSE
ENSMUSG00000027203	0.715998	1.42126e-06	Dut	FALSE
ENSMUSG00000037519	0.716467	1.42126e-06	Ppfia1	FALSE
ENSMUSG00000079083	0.717062	0.00115753	Jrkl	TRUE
ENSMUSG00000054091	0.718824	1.42126e-06	1810037I17Rik	TRUE
ENSMUSG00000006711	0.723497	7.48806e-06	D130043K22Rik	FALSE
ENSMUSG00000018001	0.726025	5.63004e-06	Cyth3	FALSE
ENSMUSG00000020224	0.729199	1.42126e-06	Llph	FALSE
ENSMUSG00000005973	0.733272	3.0285e-06	Rcn1	TRUE
ENSMUSG00000035834	0.734113	0.00146565	Polr3g	TRUE
ENSMUSG00000029049	0.734214	0.000394537	Morn1	TRUE
ENSMUSG00000024527	0.735373	1.42126e-06	Afg3l2	TRUE
ENSMUSG00000041378	0.735389	1.42126e-06	Cldn5	TRUE
ENSMUSG00000004268	0.736324	1.42126e-06	Emg1	TRUE
ENSMUSG00000034311	0.73776	0.00296708	Kif4	TRUE
ENSMUSG00000021725	0.738807	6.73493e-05	Parp8	TRUE
ENSMUSG00000033653	0.739163	1.42126e-06	Vps8	FALSE
ENSMUSG00000024397	0.739761	3.0285e-06	Aif1	TRUE
ENSMUSG00000018068	0.740635	1.42126e-06	Ints2	FALSE
ENSMUSG00000029675	0.742705	0.000456769	Eln	TRUE
ENSMUSG00000040945	0.744108	1.42126e-06	Rcc2	FALSE
ENSMUSG00000038806	0.744736	1.42126e-06	Sde2	TRUE
ENSMUSG00000029338	0.746014	1.42126e-06	Antxr2	TRUE
ENSMUSG00000093661	0.746819	8.04994e-05	Eif4e3	TRUE
ENSMUSG00000021335	0.751952	1.42126e-06	Slc17a1	FALSE
ENSMUSG00000020100	0.755584	0.000114592	Slc29a3	FALSE
ENSMUSG00000037762	0.758571	2.222e-06	Slc16a9	TRUE
ENSMUSG00000037007	0.760128	2.222e-06	Zfp113	TRUE
ENSMUSG00000028133	0.760132	1.27207e-05	Rwdd3	FALSE
ENSMUSG00000010376	0.760414	5.63004e-06	Nedd8	FALSE
ENSMUSG00000030739	0.763057	2.222e-06	Myh14	FALSE
ENSMUSG00000028419	0.76639	1.42126e-06	Chmp5	TRUE
ENSMUSG00000050541	0.766413	0.00021798	Adra1b	FALSE
ENSMUSG00000024924	0.767589	6.73493e-05	Vldlr	FALSE
ENSMUSG00000037344	0.769362	2.222e-06	Slc12a9	TRUE
ENSMUSG00000020076	0.771237	1.42126e-06	Ddx50	TRUE
ENSMUSG00000047193	0.772937	1.42126e-06	Dync2h1	FALSE
ENSMUSG00000087687	0.773868	1.42126e-06	Pet100	TRUE
ENSMUSG00000048368	0.776591	0.000254206	Omd	TRUE
ENSMUSG00000036833	0.77841	1.42126e-06	Pnpla7	FALSE
ENSMUSG00000050621	0.782474	0.000601391	Gm9846	TRUE
ENSMUSG00000054435	0.783136	1.42126e-06	Gimap4	FALSE
ENSMUSG00000048647	0.785023	0.00148476	Exd1	TRUE
ENSMUSG00000045316	0.786143	7.48806e-06	Fahd1	TRUE
ENSMUSG00000038521	0.786247	1.42126e-06	C1s	FALSE
ENSMUSG00000021495	0.788892	0.000114592	Fam193b	TRUE
ENSMUSG00000030322	0.789881	0.000134146	Mbd4	FALSE
ENSMUSG00000050668	0.792612	1.42126e-06	Gpatch11	TRUE
ENSMUSG00000022292	0.793011	2.02077e-05	Rrm2b	FALSE
ENSMUSG00000090286	0.795502	0.00452772	Gm17615	TRUE
ENSMUSG00000032078	0.796814	1.42126e-06	Zfp259	FALSE
ENSMUSG00000031174	0.798428	3.11162e-05	Rpgr	FALSE
ENSMUSG00000038811	0.799738	0.00101816	Gngt2	FALSE
ENSMUSG00000056091	0.799836	1.42126e-06	St3gal5	FALSE
ENSMUSG00000038508	0.799953	0.000394537	Gdf15	FALSE
ENSMUSG00000028367	0.80062	1.42126e-06	Txn1	TRUE
ENSMUSG00000004098	0.80313	0.000157729	Col5a3	TRUE
ENSMUSG00000030774	0.805233	4.35563e-06	Pak1	TRUE
ENSMUSG00000041935	0.807578	2.222e-06	AW549877	TRUE
ENSMUSG00000049517	0.807846	7.48806e-06	Rps23	TRUE
ENSMUSG00000029621	0.808	1.42126e-06	Arpc1a	TRUE
ENSMUSG00000049288	0.808932	0.00021798	Lix1l	TRUE
ENSMUSG00000032199	0.822981	1.42126e-06	Polr2m	FALSE
ENSMUSG00000025870	0.826768	4.35563e-06	Arl10	TRUE
ENSMUSG00000022206	0.826921	2.52835e-05	Npr3	TRUE
ENSMUSG00000073563	0.826926	1.42126e-06	Csnk1g3	TRUE
ENSMUSG00000022884	0.828641	1.42126e-06	Eif4a2	FALSE
ENSMUSG00000041695	0.831166	0.000157729	Kcnj2	TRUE
ENSMUSG00000042625	0.832413	1.42126e-06	Safb2	FALSE
ENSMUSG00000022000	0.837172	2.222e-06	Zc3h13	TRUE
ENSMUSG00000029761	0.842972	1.42126e-06	Cald1	TRUE
ENSMUSG00000049327	0.844567	1.42126e-06	Setd8	FALSE
ENSMUSG00000048232	0.846438	0.000114592	Fbxo10	TRUE
ENSMUSG00000020248	0.846929	3.0285e-06	Nfyb	FALSE
ENSMUSG00000061780	0.850217	0.000542202	Cfd	TRUE
ENSMUSG00000062515	0.854208	1.42126e-06	Fabp4	TRUE
ENSMUSG00000024421	0.854812	1.42126e-06	Lama3	TRUE
ENSMUSG00000044033	0.863696	1.42126e-06	Ccdc141	FALSE
ENSMUSG00000021338	0.865956	1.42126e-06	Lrrc16a	FALSE
ENSMUSG00000024990	0.867871	0.00101816	Rbp4	FALSE
ENSMUSG00000079480	0.868467	1.42126e-06	Pin4	TRUE
ENSMUSG00000090942	0.869466	0.000185664	F830016B08Rik	TRUE
ENSMUSG00000028649	0.871743	1.42126e-06	Macf1	FALSE
ENSMUSG00000038489	0.876663	0.00367797	Polr2l	TRUE
ENSMUSG00000022894	0.876852	0.000134146	Adamts5	TRUE
ENSMUSG00000067847	0.876983	1.42126e-06	Romo1	FALSE
ENSMUSG00000002831	0.878237	7.48806e-06	Plin4	TRUE
ENSMUSG00000001305	0.88335	3.0285e-06	Rrp15	TRUE
ENSMUSG00000028339	0.88731	1.42126e-06	Col15a1	TRUE
ENSMUSG00000025351	0.887647	1.42126e-06	Cd63	FALSE
ENSMUSG00000028955	0.893233	1.42126e-06	Vamp3	TRUE
ENSMUSG00000028356	0.894079	0.00148476	Ambp	TRUE
ENSMUSG00000029535	0.899273	3.0285e-06	Triap1	TRUE
ENSMUSG00000069792	0.901937	7.48806e-06	Wfdc17	TRUE
ENSMUSG00000026238	0.913225	0.000896372	Ptma	TRUE
ENSMUSG00000031444	0.91453	6.8769e-05	F10	FALSE
ENSMUSG00000038871	0.920141	2.222e-06	Bpgm	FALSE
ENSMUSG00000020810	0.921761	5.63004e-06	Cygb	TRUE
ENSMUSG00000028976	0.92967	2.222e-06	Slc2a5	TRUE
ENSMUSG00000016495	0.933475	2.222e-06	Plgrkt	FALSE
ENSMUSG00000062866	0.942263	2.222e-06	Phactr2	TRUE
ENSMUSG00000038541	0.945154	6.73493e-05	Srd5a2	TRUE
ENSMUSG00000044968	0.94783	4.58716e-05	Napepld	FALSE
ENSMUSG00000037814	0.948328	1.42126e-06	Larp1b	TRUE
ENSMUSG00000090258	0.950676	1.42126e-06	Churc1	FALSE
ENSMUSG00000040213	0.95453	1.42126e-06	Ccbl2	FALSE
ENSMUSG00000019874	0.954745	2.222e-06	Fabp7	TRUE
ENSMUSG00000025001	0.956894	0.000296425	Hells	TRUE
ENSMUSG00000036585	0.958328	1.42126e-06	Fgf1	FALSE
ENSMUSG00000025429	0.965873	1.42126e-06	Pstpip2	TRUE
ENSMUSG00000002265	0.972554	7.48806e-06	Peg3	TRUE
ENSMUSG00000042541	0.974636	1.42126e-06	Shfm1	TRUE
ENSMUSG00000042712	0.976349	1.42126e-06	Wbp5	FALSE
ENSMUSG00000069922	0.983641	0.00329945	Ces3a	FALSE
ENSMUSG00000060373	0.995998	1.42126e-06	Hnrnpc	FALSE
ENSMUSG00000045392	0.999665	1.60627e-05	Olfr1033	TRUE
ENSMUSG00000026131	1.00799	1.42126e-06	Dst	TRUE
ENSMUSG00000047284	1.00914	1.42126e-06	Neurl4	TRUE
ENSMUSG00000033831	1.01429	1.42126e-06	Fgb	TRUE
ENSMUSG00000022270	1.01586	1.42126e-06	Fam134b	FALSE
ENSMUSG00000036501	1.0208	1.42126e-06	Fam13b	TRUE
ENSMUSG00000033032	1.03799	1.42126e-06	Afap1l1	FALSE
ENSMUSG00000074254	1.04156	0.000222712	Cyp2a4	TRUE
ENSMUSG00000038374	1.04702	2.222e-06	Rbm8a	TRUE
ENSMUSG00000032083	1.04743	0.000254206	Apoa1	TRUE
ENSMUSG00000018417	1.04829	1.42126e-06	Myo1b	FALSE
ENSMUSG00000009545	1.05782	1.42126e-06	Kcnq1	TRUE
ENSMUSG00000030096	1.05912	1.42126e-06	Slc6a6	TRUE
ENSMUSG00000021210	1.05987	0.000296425	Akr1c6	TRUE
ENSMUSG00000021390	1.06567	0.00166855	Ogn	TRUE
ENSMUSG00000003865	1.07843	1.27207e-05	Gys1	TRUE
ENSMUSG00000067149	1.08139	0.00239687	Igj	TRUE
ENSMUSG00000072849	1.09931	0.000394537	Serpina1e	FALSE
ENSMUSG00000030814	1.10496	1.42126e-06	Bcl7c	TRUE
ENSMUSG00000020669	1.10985	2.222e-06	Sh3yl1	TRUE
ENSMUSG00000031107	1.11009	5.63004e-06	Rbmx2	TRUE
ENSMUSG00000042379	1.11698	1.79713e-05	Esm1	TRUE
ENSMUSG00000027249	1.12525	1.42126e-06	F2	FALSE
ENSMUSG00000032827	1.12587	1.42126e-06	Ppp1r9a	FALSE
ENSMUSG00000004221	1.12662	1.42126e-06	Ikbkg	FALSE
ENSMUSG00000030826	1.13126	1.42126e-06	Bcat2	TRUE
ENSMUSG00000042216	1.14754	4.35563e-06	Sgsm1	TRUE
ENSMUSG00000052698	1.2065	1.42126e-06	Tln2	FALSE
ENSMUSG00000031722	1.20823	4.35563e-06	Hp	TRUE
ENSMUSG00000047238	1.21896	2.222e-06	Mageh1	TRUE
ENSMUSG00000030124	1.23652	0.000394537	Lag3	TRUE
ENSMUSG00000041995	1.247	1.42126e-06	Zbed3	TRUE
ENSMUSG00000070985	1.26323	1.42126e-06	Acnat1	FALSE
ENSMUSG00000044258	1.26947	4.35563e-06	Ctla2a	TRUE
ENSMUSG00000049744	1.27371	2.222e-06	Arhgap15	FALSE
ENSMUSG00000020121	1.27733	0.00987574	Srgap1	FALSE
ENSMUSG00000026200	1.30979	1.42126e-06	Glb1l	TRUE
ENSMUSG00000017344	1.31353	0.00148476	Vtn	TRUE
ENSMUSG00000033721	1.32869	1.42126e-06	Vav3	TRUE
ENSMUSG00000063730	1.34984	1.42126e-06	Hsd3b2	FALSE
ENSMUSG00000074768	1.36491	1.42126e-06	Bhmt	TRUE
ENSMUSG00000057400	1.47873	1.42126e-06	Ces1c	TRUE
ENSMUSG00000044042	1.54817	1.42126e-06	Fmn1	FALSE
ENSMUSG00000014232	1.5971	1.42126e-06	Cluap1	FALSE
ENSMUSG00000022899	1.64202	1.42126e-06	Slc15a2	FALSE
ENSMUSG00000067455	1.67936	9.60631e-05	Hist1h4j	TRUE
ENSMUSG00000022868	1.68175	9.60631e-05	Ahsg	TRUE
ENSMUSG00000030895	1.6911	2.02077e-05	Hpx	TRUE
ENSMUSG00000006134	1.78723	9.81236e-06	Crkl	TRUE
ENSMUSG00000039988	1.78942	1.42126e-06	Ankrd13c	FALSE
ENSMUSG00000066154	1.82536	0.000157729	Mup3	FALSE
ENSMUSG00000059908	1.90824	3.80914e-05	Mug1	TRUE
ENSMUSG00000038072	1.91352	1.42126e-06	Galnt11	FALSE
ENSMUSG00000029553	1.91475	1.42126e-06	Tfec	TRUE
ENSMUSG00000078672	1.92332	5.63004e-06	Mup20	TRUE
ENSMUSG00000030968	2.13349	1.42126e-06	Pdilt	TRUE
ENSMUSG00000032060	2.2034	1.42126e-06	Cryab	TRUE
ENSMUSG00000060678	2.29952	1.42126e-06	Hist1h4c	TRUE
ENSMUSG00000053553	2.30201	1.42126e-06	3110082I17Rik	TRUE
ENSMUSG00000025991	2.37385	5.63004e-06	Cps1	TRUE
ENSMUSG00000056035	2.62465	2.222e-06	Cyp3a11	TRUE

## Sheet: GO_Diff_TE_genes_960(all)
Category	Term	Count	%	PValue	Genes	List Total	Pop Hits	Pop Total	Fold Enrichment	Bonferroni	Benjamini	FDR
GOTERM_BP_FAT	GO:0006350~transcription	127	13.612	2.47165e-07	ENSMUSG00000003575, ENSMUSG00000009569, ENSMUSG00000000134, ENSMUSG00000032398, ENSMUSG00000029178, ENSMUSG00000063382, ENSMUSG00000024260, ENSMUSG00000022508, ENSMUSG00000039634, ENSMUSG00000038418, ENSMUSG00000020889, ENSMUSG00000000282, ENSMUSG00000038415, ENSMUSG00000031393, ENSMUSG00000055148, ENSMUSG00000053483, ENSMUSG00000029684, ENSMUSG00000031314, ENSMUSG00000046711, ENSMUSG00000030087,…	627	1772	13588	1.5532	0.000585116	0.000585116	0.000433334
GOTERM_BP_FAT	GO:0010628~positive regulation of gene expression	46	4.93033	6.97103e-06	ENSMUSG00000003575, ENSMUSG00000009569, ENSMUSG00000000134, ENSMUSG00000017950, ENSMUSG00000042292, ENSMUSG00000020053, ENSMUSG00000072294, ENSMUSG00000038418, ENSMUSG00000020914, ENSMUSG00000056493, ENSMUSG00000032897, ENSMUSG00000020248, ENSMUSG00000028565, ENSMUSG00000037992, ENSMUSG00000031393, ENSMUSG00000061436, ENSMUSG00000055148, ENSMUSG00000031902, ENSMUSG00000015846, ENSMUSG00000018604,…	627	488	13588	2.0428	0.016372	0.00821976	0.0122211
GOTERM_BP_FAT	GO:0045941~positive regulation of transcription	45	4.82315	7.86177e-06	ENSMUSG00000003575, ENSMUSG00000009569, ENSMUSG00000000134, ENSMUSG00000017950, ENSMUSG00000042292, ENSMUSG00000020053, ENSMUSG00000072294, ENSMUSG00000038418, ENSMUSG00000020914, ENSMUSG00000056493, ENSMUSG00000032897, ENSMUSG00000020248, ENSMUSG00000028565, ENSMUSG00000037992, ENSMUSG00000031393, ENSMUSG00000061436, ENSMUSG00000055148, ENSMUSG00000031902, ENSMUSG00000015846, ENSMUSG00000018604,…	627	475	13588	2.05308	0.0184445	0.00618636	0.0137825
GOTERM_BP_FAT	GO:0045893~positive regulation of transcription, DNA-dependent	41	4.39443	8.51028e-06	ENSMUSG00000003575, ENSMUSG00000009569, ENSMUSG00000000134, ENSMUSG00000017950, ENSMUSG00000020053, ENSMUSG00000072294, ENSMUSG00000038418, ENSMUSG00000020914, ENSMUSG00000056493, ENSMUSG00000032897, ENSMUSG00000020248, ENSMUSG00000028565, ENSMUSG00000031393, ENSMUSG00000061436, ENSMUSG00000037992, ENSMUSG00000031902, ENSMUSG00000015846, ENSMUSG00000018604, ENSMUSG00000053483, ENSMUSG00000031681,…	627	416	13588	2.13589	0.0199507	0.00502544	0.0149193
GOTERM_BP_FAT	GO:0051254~positive regulation of RNA metabolic process	41	4.39443	1.01048e-05	ENSMUSG00000003575, ENSMUSG00000009569, ENSMUSG00000000134, ENSMUSG00000017950, ENSMUSG00000020053, ENSMUSG00000072294, ENSMUSG00000038418, ENSMUSG00000020914, ENSMUSG00000056493, ENSMUSG00000032897, ENSMUSG00000020248, ENSMUSG00000028565, ENSMUSG00000031393, ENSMUSG00000061436, ENSMUSG00000037992, ENSMUSG00000031902, ENSMUSG00000015846, ENSMUSG00000018604, ENSMUSG00000053483, ENSMUSG00000031681,…	627	419	13588	2.1206	0.0236443	0.00477423	0.0177145
GOTERM_BP_FAT	GO:0045449~regulation of transcription	144	15.4341	1.12387e-05	ENSMUSG00000003575, ENSMUSG00000009569, ENSMUSG00000000134, ENSMUSG00000032398, ENSMUSG00000029178, ENSMUSG00000063382, ENSMUSG00000024260, ENSMUSG00000022508, ENSMUSG00000039634, ENSMUSG00000038418, ENSMUSG00000020889, ENSMUSG00000000282, ENSMUSG00000038415, ENSMUSG00000031393, ENSMUSG00000055148, ENSMUSG00000026436, ENSMUSG00000053483, ENSMUSG00000059474, ENSMUSG00000029684, ENSMUSG00000031314,…	627	2227	13588	1.4013	0.0262625	0.00442576	0.0197021
GOTERM_CC_FAT	GO:0070013~intracellular organelle lumen	81	8.68167	1.73899e-05	ENSMUSG00000000134, ENSMUSG00000029614, ENSMUSG00000038967, ENSMUSG00000071415, ENSMUSG00000028809, ENSMUSG00000029781, ENSMUSG00000020076, ENSMUSG00000004268, ENSMUSG00000029715, ENSMUSG00000037470, ENSMUSG00000018537, ENSMUSG00000031681, ENSMUSG00000021967, ENSMUSG00000040964, ENSMUSG00000025920, ENSMUSG00000031314, ENSMUSG00000052293, ENSMUSG00000042406, ENSMUSG00000026833, ENSMUSG00000007817,…	556	1133	12504	1.60779	0.0062927	0.0062927	0.0239101
GOTERM_CC_FAT	GO:0043233~organelle lumen	81	8.68167	1.91251e-05	ENSMUSG00000000134, ENSMUSG00000029614, ENSMUSG00000038967, ENSMUSG00000071415, ENSMUSG00000028809, ENSMUSG00000029781, ENSMUSG00000020076, ENSMUSG00000004268, ENSMUSG00000029715, ENSMUSG00000037470, ENSMUSG00000018537, ENSMUSG00000031681, ENSMUSG00000021967, ENSMUSG00000040964, ENSMUSG00000025920, ENSMUSG00000031314, ENSMUSG00000052293, ENSMUSG00000042406, ENSMUSG00000026833, ENSMUSG00000007817,…	556	1136	12504	1.60354	0.00691843	0.00346522	0.0262956
GOTERM_BP_FAT	GO:0006357~regulation of transcription from RNA polymerase II promoter	53	5.6806	1.67093e-05	ENSMUSG00000003575, ENSMUSG00000009569, ENSMUSG00000004263, ENSMUSG00000000134, ENSMUSG00000072294, ENSMUSG00000022508, ENSMUSG00000038418, ENSMUSG00000021366, ENSMUSG00000037992, ENSMUSG00000018537, ENSMUSG00000031681, ENSMUSG00000032735, ENSMUSG00000052293, ENSMUSG00000042406, ENSMUSG00000022463, ENSMUSG00000007817, ENSMUSG00000045248, ENSMUSG00000072872, ENSMUSG00000027490, ENSMUSG00000040712,…	627	616	13588	1.86459	0.0387953	0.00563661	0.029291
GOTERM_BP_FAT	GO:0045935~positive regulation of nucleobase, nucleoside, nucleotide and nucleic acid metabolic process	46	4.93033	2.12917e-05	ENSMUSG00000003575, ENSMUSG00000009569, ENSMUSG00000000134, ENSMUSG00000017950, ENSMUSG00000042292, ENSMUSG00000020053, ENSMUSG00000072294, ENSMUSG00000038418, ENSMUSG00000020914, ENSMUSG00000056493, ENSMUSG00000032897, ENSMUSG00000024019, ENSMUSG00000020248, ENSMUSG00000028565, ENSMUSG00000037992, ENSMUSG00000031393, ENSMUSG00000061436, ENSMUSG00000055148, ENSMUSG00000031902, ENSMUSG00000015846,…	627	510	13588	1.95468	0.0491692	0.00628258	0.0373224
GOTERM_CC_FAT	GO:0031974~membrane-enclosed lumen	82	8.78885	3.51946e-05	ENSMUSG00000000134, ENSMUSG00000029614, ENSMUSG00000038967, ENSMUSG00000071415, ENSMUSG00000028809, ENSMUSG00000029781, ENSMUSG00000020076, ENSMUSG00000004268, ENSMUSG00000029715, ENSMUSG00000037470, ENSMUSG00000018537, ENSMUSG00000031681, ENSMUSG00000021967, ENSMUSG00000040964, ENSMUSG00000025920, ENSMUSG00000031314, ENSMUSG00000052293, ENSMUSG00000042406, ENSMUSG00000026833, ENSMUSG00000007817,…	556	1174	12504	1.5708	0.0126946	0.00424956	0.0483849
GOTERM_BP_FAT	GO:0010604~positive regulation of macromolecule metabolic process	53	5.6806	3.48747e-05	ENSMUSG00000003575, ENSMUSG00000009569, ENSMUSG00000000134, ENSMUSG00000042292, ENSMUSG00000072294, ENSMUSG00000038418, ENSMUSG00000024019, ENSMUSG00000031393, ENSMUSG00000037992, ENSMUSG00000055148, ENSMUSG00000018604, ENSMUSG00000031681, ENSMUSG00000053483, ENSMUSG00000019927, ENSMUSG00000032735, ENSMUSG00000046711, ENSMUSG00000052293, ENSMUSG00000042406, ENSMUSG00000030087, ENSMUSG00000022463,…	627	633	13588	1.81451	0.0792667	0.00913412	0.0611255
GOTERM_BP_FAT	GO:0051173~positive regulation of nitrogen compound metabolic process	46	4.93033	4.54543e-05	ENSMUSG00000003575, ENSMUSG00000009569, ENSMUSG00000000134, ENSMUSG00000017950, ENSMUSG00000042292, ENSMUSG00000020053, ENSMUSG00000072294, ENSMUSG00000038418, ENSMUSG00000020914, ENSMUSG00000056493, ENSMUSG00000032897, ENSMUSG00000024019, ENSMUSG00000020248, ENSMUSG00000028565, ENSMUSG00000037992, ENSMUSG00000031393, ENSMUSG00000061436, ENSMUSG00000055148, ENSMUSG00000031902, ENSMUSG00000015846,…	627	526	13588	1.89522	0.102048	0.0107061	0.0796615
GOTERM_BP_FAT	GO:0008610~lipid biosynthetic process	30	3.21543	5.37096e-05	ENSMUSG00000021210, ENSMUSG00000069456, ENSMUSG00000058454, ENSMUSG00000023452, ENSMUSG00000025203, ENSMUSG00000037071, ENSMUSG00000063730, ENSMUSG00000032349, ENSMUSG00000017721, ENSMUSG00000010607, ENSMUSG00000045294, ENSMUSG00000030682, ENSMUSG00000030990, ENSMUSG00000021594, ENSMUSG00000032083, ENSMUSG00000038641, ENSMUSG00000006390, ENSMUSG00000026811, ENSMUSG00000072115, ENSMUSG00000079469,…	627	285	13588	2.28121	0.119432	0.0114959	0.094123
GOTERM_MF_FAT	GO:0003779~actin binding	30	3.21543	7.64986e-05	ENSMUSG00000009569, ENSMUSG00000030739, ENSMUSG00000042292, ENSMUSG00000029761, ENSMUSG00000028868, ENSMUSG00000028649, ENSMUSG00000026755, ENSMUSG00000028464, ENSMUSG00000021262, ENSMUSG00000025429, ENSMUSG00000044042, ENSMUSG00000043079, ENSMUSG00000029684, ENSMUSG00000032735, ENSMUSG00000018417, ENSMUSG00000020315, ENSMUSG00000026131, ENSMUSG00000038976, ENSMUSG00000024397, ENSMUSG00000024236,…	619	288	13288	2.23613	0.0538812	0.0538812	0.115822
GOTERM_BP_FAT	GO:0010557~positive regulation of macromolecule biosynthetic process	45	4.82315	0.000110713	ENSMUSG00000003575, ENSMUSG00000009569, ENSMUSG00000000134, ENSMUSG00000017950, ENSMUSG00000042292, ENSMUSG00000020053, ENSMUSG00000072294, ENSMUSG00000038418, ENSMUSG00000020914, ENSMUSG00000056493, ENSMUSG00000032897, ENSMUSG00000020248, ENSMUSG00000028565, ENSMUSG00000037992, ENSMUSG00000031393, ENSMUSG00000061436, ENSMUSG00000055148, ENSMUSG00000031902, ENSMUSG00000015846, ENSMUSG00000018604,…	627	530	13588	1.84003	0.23063	0.0216117	0.193927
GOTERM_BP_FAT	GO:0045944~positive regulation of transcription from RNA polymerase II promoter	34	3.64416	0.000118924	ENSMUSG00000003575, ENSMUSG00000009569, ENSMUSG00000000134, ENSMUSG00000017950, ENSMUSG00000020053, ENSMUSG00000072294, ENSMUSG00000038418, ENSMUSG00000020914, ENSMUSG00000028565, ENSMUSG00000061436, ENSMUSG00000037992, ENSMUSG00000031902, ENSMUSG00000015846, ENSMUSG00000031681, ENSMUSG00000032238, ENSMUSG00000026803, ENSMUSG00000046876, ENSMUSG00000026077, ENSMUSG00000008999, ENSMUSG00000032735,…	627	358	13588	2.05818	0.245447	0.0214308	0.208295
GOTERM_CC_FAT	GO:0005783~endoplasmic reticulum	61	6.53805	0.000155358	ENSMUSG00000074254, ENSMUSG00000024875, ENSMUSG00000025203, ENSMUSG00000036833, ENSMUSG00000029781, ENSMUSG00000063730, ENSMUSG00000032349, ENSMUSG00000017721, ENSMUSG00000037470, ENSMUSG00000045294, ENSMUSG00000071657, ENSMUSG00000025920, ENSMUSG00000036835, ENSMUSG00000030682, ENSMUSG00000021594, ENSMUSG00000010936, ENSMUSG00000051984, ENSMUSG00000022463, ENSMUSG00000026833, ENSMUSG00000069922,…	556	838	12504	1.63704	0.0548385	0.0140009	0.213421
GOTERM_BP_FAT	GO:0008202~steroid metabolic process	20	2.14362	0.000154911	ENSMUSG00000021210, ENSMUSG00000022463, ENSMUSG00000058454, ENSMUSG00000038641, ENSMUSG00000032245, ENSMUSG00000063730, ENSMUSG00000024924, ENSMUSG00000057722, ENSMUSG00000037606, ENSMUSG00000038541, ENSMUSG00000021252, ENSMUSG00000031393, ENSMUSG00000027875, ENSMUSG00000020435, ENSMUSG00000029556, ENSMUSG00000045294, ENSMUSG00000023963, ENSMUSG00000021594, ENSMUSG00000032081, ENSMUSG00000032083	627	161	13588	2.69211	0.307092	0.0258638	0.271245
GOTERM_BP_FAT	GO:0001568~blood vessel development	26	2.78671	0.000155138	ENSMUSG00000009569, ENSMUSG00000042677, ENSMUSG00000021127, ENSMUSG00000058454, ENSMUSG00000031465, ENSMUSG00000028868, ENSMUSG00000006134, ENSMUSG00000018604, ENSMUSG00000008398, ENSMUSG00000039844, ENSMUSG00000033792, ENSMUSG00000057789, ENSMUSG00000001435, ENSMUSG00000007817, ENSMUSG00000072115, ENSMUSG00000030123, ENSMUSG00000057722, ENSMUSG00000015605, ENSMUSG00000050541, ENSMUSG00000057342,…	627	244	13588	2.30925	0.307464	0.0241955	0.271642
GOTERM_BP_FAT	GO:0022904~respiratory electron transport chain	8	0.857449	0.000216047	ENSMUSG00000064356, ENSMUSG00000021520, ENSMUSG00000064357, ENSMUSG00000031393, ENSMUSG00000064358, ENSMUSG00000064367, ENSMUSG00000064370, ENSMUSG00000064345, ENSMUSG00000064363, ENSMUSG00000064354	627	28	13588	6.19184	0.400497	0.0314724	0.378101
GOTERM_BP_FAT	GO:0001944~vasculature development	26	2.78671	0.000226706	ENSMUSG00000009569, ENSMUSG00000042677, ENSMUSG00000021127, ENSMUSG00000058454, ENSMUSG00000031465, ENSMUSG00000028868, ENSMUSG00000006134, ENSMUSG00000018604, ENSMUSG00000008398, ENSMUSG00000039844, ENSMUSG00000033792, ENSMUSG00000057789, ENSMUSG00000001435, ENSMUSG00000007817, ENSMUSG00000072115, ENSMUSG00000030123, ENSMUSG00000057722, ENSMUSG00000015605, ENSMUSG00000050541, ENSMUSG00000057342,…	627	250	13588	2.25383	0.415443	0.0310889	0.396722
GOTERM_MF_FAT	GO:0030528~transcription regulator activity	83	8.89603	0.00026973	ENSMUSG00000003575, ENSMUSG00000004263, ENSMUSG00000009569, ENSMUSG00000000134, ENSMUSG00000049086, ENSMUSG00000003949, ENSMUSG00000042292, ENSMUSG00000072294, ENSMUSG00000040721, ENSMUSG00000022508, ENSMUSG00000038418, ENSMUSG00000020889, ENSMUSG00000000282, ENSMUSG00000021366, ENSMUSG00000038415, ENSMUSG00000037992, ENSMUSG00000031393, ENSMUSG00000026436, ENSMUSG00000055148, ENSMUSG00000018604,…	619	1206	13288	1.47741	0.177421	0.0930385	0.407825
GOTERM_MF_FAT	GO:0003677~DNA binding	114	12.2186	0.000280787	ENSMUSG00000021127, ENSMUSG00000000134, ENSMUSG00000029178, ENSMUSG00000060743, ENSMUSG00000022508, ENSMUSG00000038418, ENSMUSG00000020889, ENSMUSG00000000282, ENSMUSG00000038415, ENSMUSG00000031393, ENSMUSG00000055148, ENSMUSG00000026436, ENSMUSG00000018102, ENSMUSG00000025409, ENSMUSG00000031314, ENSMUSG00000046711, ENSMUSG00000030087, ENSMUSG00000073423, ENSMUSG00000022463, ENSMUSG00000045248,…	619	1781	13288	1.37407	0.183981	0.0655271	0.42451
GOTERM_BP_FAT	GO:0031328~positive regulation of cellular biosynthetic process	45	4.82315	0.000273818	ENSMUSG00000003575, ENSMUSG00000009569, ENSMUSG00000000134, ENSMUSG00000017950, ENSMUSG00000042292, ENSMUSG00000020053, ENSMUSG00000072294, ENSMUSG00000038418, ENSMUSG00000020914, ENSMUSG00000056493, ENSMUSG00000032897, ENSMUSG00000020248, ENSMUSG00000028565, ENSMUSG00000037992, ENSMUSG00000031393, ENSMUSG00000061436, ENSMUSG00000055148, ENSMUSG00000031902, ENSMUSG00000015846, ENSMUSG00000018604,…	627	552	13588	1.76669	0.477166	0.035386	0.478979
GOTERM_BP_FAT	GO:0046486~glycerolipid metabolic process	17	1.82208	0.000285153	ENSMUSG00000026925, ENSMUSG00000036833, ENSMUSG00000034731, ENSMUSG00000030228, ENSMUSG00000021340, ENSMUSG00000072115, ENSMUSG00000079469, ENSMUSG00000000301, ENSMUSG00000017721, ENSMUSG00000010607, ENSMUSG00000031393, ENSMUSG00000045294, ENSMUSG00000022973, ENSMUSG00000070644, ENSMUSG00000030990, ENSMUSG00000032081, ENSMUSG00000020334	627	129	13588	2.85593	0.491016	0.0349198	0.498759
GOTERM_CC_FAT	GO:0030529~ribonucleoprotein complex	38	4.07288	0.000371736	ENSMUSG00000034120, ENSMUSG00000007892, ENSMUSG00000021607, ENSMUSG00000056851, ENSMUSG00000047215, ENSMUSG00000029614, ENSMUSG00000021413, ENSMUSG00000034880, ENSMUSG00000026511, ENSMUSG00000060373, ENSMUSG00000078765, ENSMUSG00000037814, ENSMUSG00000071415, ENSMUSG00000028809, ENSMUSG00000024949, ENSMUSG00000001445, ENSMUSG00000063480, ENSMUSG00000000948, ENSMUSG00000021967, ENSMUSG00000068856,…	556	462	12504	1.84976	0.126254	0.026632	0.509962
GOTERM_BP_FAT	GO:0009891~positive regulation of biosynthetic process	45	4.82315	0.000332062	ENSMUSG00000003575, ENSMUSG00000009569, ENSMUSG00000000134, ENSMUSG00000017950, ENSMUSG00000042292, ENSMUSG00000020053, ENSMUSG00000072294, ENSMUSG00000038418, ENSMUSG00000020914, ENSMUSG00000056493, ENSMUSG00000032897, ENSMUSG00000020248, ENSMUSG00000028565, ENSMUSG00000037992, ENSMUSG00000031393, ENSMUSG00000061436, ENSMUSG00000055148, ENSMUSG00000031902, ENSMUSG00000015846, ENSMUSG00000018604,…	627	557	13588	1.75084	0.544543	0.0385596	0.580582
INTERPRO	IPR019955:Ubiquitin supergroup	10	1.07181	0.000397033	ENSMUSG00000055720, ENSMUSG00000025171, ENSMUSG00000035621, ENSMUSG00000041827, ENSMUSG00000003813, ENSMUSG00000027466, ENSMUSG00000028958, ENSMUSG00000008604, ENSMUSG00000055553, ENSMUSG00000010376	816	50	17763	4.35368	0.392483	0.392483	0.643498
GOTERM_BP_FAT	GO:0006694~steroid biosynthetic process	12	1.28617	0.000374425	ENSMUSG00000021210, ENSMUSG00000038541, ENSMUSG00000021252, ENSMUSG00000027875, ENSMUSG00000038641, ENSMUSG00000058454, ENSMUSG00000029556, ENSMUSG00000045294, ENSMUSG00000023963, ENSMUSG00000021594, ENSMUSG00000063730, ENSMUSG00000032083	627	71	13588	3.66278	0.58803	0.0413495	0.654421
GOTERM_BP_FAT	GO:0006644~phospholipid metabolic process	19	2.03644	0.000518689	ENSMUSG00000026925, ENSMUSG00000023452, ENSMUSG00000036833, ENSMUSG00000030228, ENSMUSG00000044968, ENSMUSG00000021340, ENSMUSG00000079469, ENSMUSG00000000301, ENSMUSG00000057342, ENSMUSG00000017721, ENSMUSG00000010607, ENSMUSG00000031393, ENSMUSG00000022973, ENSMUSG00000070644, ENSMUSG00000030682, ENSMUSG00000030990, ENSMUSG00000034254, ENSMUSG00000026922, ENSMUSG00000032083	627	163	13588	2.52612	0.707291	0.0543136	0.905488
GOTERM_MF_FAT	GO:0046914~transition metal ion binding	154	16.5059	0.000814236	ENSMUSG00000021127, ENSMUSG00000029178, ENSMUSG00000025203, ENSMUSG00000066440, ENSMUSG00000032582, ENSMUSG00000022508, ENSMUSG00000039634, ENSMUSG00000038418, ENSMUSG00000020889, ENSMUSG00000001844, ENSMUSG00000025193, ENSMUSG00000055148, ENSMUSG00000025197, ENSMUSG00000024050, ENSMUSG00000059474, ENSMUSG00000030087, ENSMUSG00000073423, ENSMUSG00000034248, ENSMUSG00000000276, ENSMUSG00000025786,…	619	2608	13288	1.2676	0.445533	0.137083	1.22638
GOTERM_BP_FAT	GO:0016125~sterol metabolic process	12	1.28617	0.000761242	ENSMUSG00000022463, ENSMUSG00000021252, ENSMUSG00000027875, ENSMUSG00000058454, ENSMUSG00000029556, ENSMUSG00000045294, ENSMUSG00000023963, ENSMUSG00000032245, ENSMUSG00000024924, ENSMUSG00000032081, ENSMUSG00000057722, ENSMUSG00000032083	627	77	13588	3.37737	0.835247	0.0754098	1.32626
GOTERM_MF_FAT	GO:0008092~cytoskeletal protein binding	35	3.75134	0.000935353	ENSMUSG00000009569, ENSMUSG00000030739, ENSMUSG00000042292, ENSMUSG00000029761, ENSMUSG00000028868, ENSMUSG00000028649, ENSMUSG00000037601, ENSMUSG00000026755, ENSMUSG00000025555, ENSMUSG00000028464, ENSMUSG00000021262, ENSMUSG00000025429, ENSMUSG00000003810, ENSMUSG00000044042, ENSMUSG00000043079, ENSMUSG00000029684, ENSMUSG00000032735, ENSMUSG00000018417, ENSMUSG00000020315, ENSMUSG00000002055,…	619	414	13288	1.81483	0.492121	0.126723	1.4076
GOTERM_BP_FAT	GO:0048514~blood vessel morphogenesis	21	2.2508	0.000823392	ENSMUSG00000009569, ENSMUSG00000001435, ENSMUSG00000042677, ENSMUSG00000021127, ENSMUSG00000007817, ENSMUSG00000031465, ENSMUSG00000072115, ENSMUSG00000030123, ENSMUSG00000028868, ENSMUSG00000057722, ENSMUSG00000015605, ENSMUSG00000050541, ENSMUSG00000008398, ENSMUSG00000038742, ENSMUSG00000033792, ENSMUSG00000036585, ENSMUSG00000026814, ENSMUSG00000057789, ENSMUSG00000039910, ENSMUSG00000046470,…	627	198	13588	2.29849	0.857811	0.0780597	1.4338
GOTERM_CC_FAT	GO:0005681~spliceosome	15	1.60772	0.00118774	ENSMUSG00000034120, ENSMUSG00000021413, ENSMUSG00000060373, ENSMUSG00000078765, ENSMUSG00000028809, ENSMUSG00000038374, ENSMUSG00000024949, ENSMUSG00000029402, ENSMUSG00000063480, ENSMUSG00000009076, ENSMUSG00000068856, ENSMUSG00000044709, ENSMUSG00000061479, ENSMUSG00000020211, ENSMUSG00000046434	556	124	12504	2.72047	0.350406	0.0693772	1.62095
GOTERM_CC_FAT	GO:0005788~endoplasmic reticulum lumen	11	1.17899	0.00122792	ENSMUSG00000037470, ENSMUSG00000026833, ENSMUSG00000069456, ENSMUSG00000069922, ENSMUSG00000005973, ENSMUSG00000029767, ENSMUSG00000057400, ENSMUSG00000032245, ENSMUSG00000029781, ENSMUSG00000026047, ENSMUSG00000021143	556	72	12504	3.43585	0.359823	0.0617283	1.67535
GOTERM_BP_FAT	GO:0042773~ATP synthesis coupled electron transport	6	0.643087	0.00106051	ENSMUSG00000064356, ENSMUSG00000021520, ENSMUSG00000064357, ENSMUSG00000031393, ENSMUSG00000064358, ENSMUSG00000064367, ENSMUSG00000064345, ENSMUSG00000064363	627	18	13588	7.22382	0.918944	0.095619	1.84309
INTERPRO	IPR000626:Ubiquitin	9	0.96463	0.00121618	ENSMUSG00000055720, ENSMUSG00000025171, ENSMUSG00000035621, ENSMUSG00000041827, ENSMUSG00000003813, ENSMUSG00000028958, ENSMUSG00000008604, ENSMUSG00000055553, ENSMUSG00000010376	816	47	17763	4.16841	0.782864	0.534021	1.95888
GOTERM_CC_FAT	GO:0031981~nuclear lumen	59	6.32369	0.00160602	ENSMUSG00000000134, ENSMUSG00000029614, ENSMUSG00000071415, ENSMUSG00000028809, ENSMUSG00000020076, ENSMUSG00000004268, ENSMUSG00000029715, ENSMUSG00000018537, ENSMUSG00000031681, ENSMUSG00000025920, ENSMUSG00000040964, ENSMUSG00000031314, ENSMUSG00000052293, ENSMUSG00000042406, ENSMUSG00000007817, ENSMUSG00000045248, ENSMUSG00000024218, ENSMUSG00000072872, ENSMUSG00000027490, ENSMUSG00000025785,…	556	883	12504	1.50268	0.442033	0.0703358	2.18596
GOTERM_BP_FAT	GO:0030029~actin filament-based process	19	2.03644	0.00127733	ENSMUSG00000038976, ENSMUSG00000024397, ENSMUSG00000030739, ENSMUSG00000025809, ENSMUSG00000022508, ENSMUSG00000072115, ENSMUSG00000028868, ENSMUSG00000033220, ENSMUSG00000015605, ENSMUSG00000075284, ENSMUSG00000025422, ENSMUSG00000021262, ENSMUSG00000029675, ENSMUSG00000032827, ENSMUSG00000044042, ENSMUSG00000029684, ENSMUSG00000024044, ENSMUSG00000056201, ENSMUSG00000073982	627	176	13588	2.33953	0.951522	0.10989	2.21595
GOTERM_BP_FAT	GO:0019637~organophosphate metabolic process	19	2.03644	0.00127733	ENSMUSG00000026925, ENSMUSG00000023452, ENSMUSG00000036833, ENSMUSG00000030228, ENSMUSG00000044968, ENSMUSG00000021340, ENSMUSG00000079469, ENSMUSG00000000301, ENSMUSG00000057342, ENSMUSG00000017721, ENSMUSG00000010607, ENSMUSG00000031393, ENSMUSG00000022973, ENSMUSG00000070644, ENSMUSG00000030682, ENSMUSG00000030990, ENSMUSG00000034254, ENSMUSG00000026922, ENSMUSG00000032083	627	176	13588	2.33953	0.951522	0.10989	2.21595
GOTERM_BP_FAT	GO:0008203~cholesterol metabolic process	11	1.17899	0.00130754	ENSMUSG00000022463, ENSMUSG00000027875, ENSMUSG00000058454, ENSMUSG00000029556, ENSMUSG00000045294, ENSMUSG00000023963, ENSMUSG00000032245, ENSMUSG00000024924, ENSMUSG00000032081, ENSMUSG00000057722, ENSMUSG00000032083	627	70	13588	3.40551	0.954873	0.108412	2.26779
GOTERM_BP_FAT	GO:0045333~cellular respiration	10	1.07181	0.00140843	ENSMUSG00000064356, ENSMUSG00000021520, ENSMUSG00000064357, ENSMUSG00000031393, ENSMUSG00000064358, ENSMUSG00000064367, ENSMUSG00000031902, ENSMUSG00000064351, ENSMUSG00000064370, ENSMUSG00000064345, ENSMUSG00000064363, ENSMUSG00000064354	627	59	13588	3.67313	0.964475	0.112367	2.44076
GOTERM_MF_FAT	GO:0003735~structural constituent of ribosome	17	1.82208	0.00177256	ENSMUSG00000007892, ENSMUSG00000021607, ENSMUSG00000047215, ENSMUSG00000029614, ENSMUSG00000034880, ENSMUSG00000071415, ENSMUSG00000030744, ENSMUSG00000001445, ENSMUSG00000010406, ENSMUSG00000021967, ENSMUSG00000050621, ENSMUSG00000026087, ENSMUSG00000057863, ENSMUSG00000063888, ENSMUSG00000055553, ENSMUSG00000079435, ENSMUSG00000049517	619	151	13288	2.4168	0.723204	0.192715	2.65178
GOTERM_CC_FAT	GO:0044429~mitochondrial part	39	4.18006	0.00196492	ENSMUSG00000005674, ENSMUSG00000021607, ENSMUSG00000018677, ENSMUSG00000034880, ENSMUSG00000038967, ENSMUSG00000024248, ENSMUSG00000025733, ENSMUSG00000064345, ENSMUSG00000001445, ENSMUSG00000064341, ENSMUSG00000024527, ENSMUSG00000064367, ENSMUSG00000021967, ENSMUSG00000057789, ENSMUSG00000024981, ENSMUSG00000061474, ENSMUSG00000034248, ENSMUSG00000022299, ENSMUSG00000025270, ENSMUSG00000054630,…	556	524	12504	1.67382	0.510303	0.0762648	2.66836
GOTERM_CC_FAT	GO:0043228~non-membrane-bounded organelle	111	11.8971	0.0022183	ENSMUSG00000059248, ENSMUSG00000029614, ENSMUSG00000030739, ENSMUSG00000071415, ENSMUSG00000060743, ENSMUSG00000020076, ENSMUSG00000032254, ENSMUSG00000028649, ENSMUSG00000031393, ENSMUSG00000029715, ENSMUSG00000018102, ENSMUSG00000021262, ENSMUSG00000036438, ENSMUSG00000041775, ENSMUSG00000029684, ENSMUSG00000040964, ENSMUSG00000025920, ENSMUSG00000046711, ENSMUSG00000032300, ENSMUSG00000020483,…	556	1919	12504	1.30083	0.55342	0.0774499	3.0076
GOTERM_CC_FAT	GO:0043232~intracellular non-membrane-bounded organelle	111	11.8971	0.0022183	ENSMUSG00000059248, ENSMUSG00000029614, ENSMUSG00000030739, ENSMUSG00000071415, ENSMUSG00000060743, ENSMUSG00000020076, ENSMUSG00000032254, ENSMUSG00000028649, ENSMUSG00000031393, ENSMUSG00000029715, ENSMUSG00000018102, ENSMUSG00000021262, ENSMUSG00000036438, ENSMUSG00000041775, ENSMUSG00000029684, ENSMUSG00000040964, ENSMUSG00000025920, ENSMUSG00000046711, ENSMUSG00000032300, ENSMUSG00000020483,…	556	1919	12504	1.30083	0.55342	0.0774499	3.0076
GOTERM_CC_FAT	GO:0005840~ribosome	19	2.03644	0.00223375	ENSMUSG00000007892, ENSMUSG00000021607, ENSMUSG00000047215, ENSMUSG00000029614, ENSMUSG00000034880, ENSMUSG00000062981, ENSMUSG00000071415, ENSMUSG00000030744, ENSMUSG00000001445, ENSMUSG00000010406, ENSMUSG00000021967, ENSMUSG00000050621, ENSMUSG00000026087, ENSMUSG00000057863, ENSMUSG00000063888, ENSMUSG00000055553, ENSMUSG00000061474, ENSMUSG00000049517, ENSMUSG00000079435	556	192	12504	2.22549	0.555924	0.0711392	3.02826
GOTERM_BP_FAT	GO:0007569~cell aging	7	0.750268	0.00178774	ENSMUSG00000007817, ENSMUSG00000018604, ENSMUSG00000067847, ENSMUSG00000026814, ENSMUSG00000033307, ENSMUSG00000041577, ENSMUSG00000000282	627	29	13588	5.23104	0.985551	0.135936	3.08841
GOTERM_BP_FAT	GO:0007568~aging	10	1.07181	0.00179146	ENSMUSG00000007817, ENSMUSG00000018604, ENSMUSG00000067847, ENSMUSG00000026814, ENSMUSG00000034254, ENSMUSG00000033739, ENSMUSG00000033307, ENSMUSG00000041577, ENSMUSG00000000282, ENSMUSG00000005089	627	61	13588	3.5527	0.985678	0.131973	3.09474
KEGG_PATHWAY	mmu04666:Fc gamma R-mediated phagocytosis	13	1.39335	0.00271537	ENSMUSG00000026755, ENSMUSG00000031834, ENSMUSG00000030774, ENSMUSG00000044147, ENSMUSG00000029621, ENSMUSG00000033721, ENSMUSG00000029684, ENSMUSG00000056201, ENSMUSG00000042632, ENSMUSG00000028868, ENSMUSG00000033220, ENSMUSG00000006134, ENSMUSG00000057342	281	98	5738	2.70877	0.352768	0.352768	3.22992
GOTERM_CC_FAT	GO:0044451~nucleoplasm part	38	4.07288	0.00248746	ENSMUSG00000034120, ENSMUSG00000000134, ENSMUSG00000017950, ENSMUSG00000038489, ENSMUSG00000078765, ENSMUSG00000028809, ENSMUSG00000028266, ENSMUSG00000018068, ENSMUSG00000058886, ENSMUSG00000032897, ENSMUSG00000020248, ENSMUSG00000061436, ENSMUSG00000018537, ENSMUSG00000039117, ENSMUSG00000031681, ENSMUSG00000022109, ENSMUSG00000026077, ENSMUSG00000040964, ENSMUSG00000046876, ENSMUSG00000031314,…	556	513	12504	1.66587	0.595083	0.0725713	3.36677
GOTERM_BP_FAT	GO:0006650~glycerophospholipid metabolic process	12	1.28617	0.00231115	ENSMUSG00000010607, ENSMUSG00000017721, ENSMUSG00000031393, ENSMUSG00000026925, ENSMUSG00000022973, ENSMUSG00000036833, ENSMUSG00000030228, ENSMUSG00000021340, ENSMUSG00000070644, ENSMUSG00000079469, ENSMUSG00000030990, ENSMUSG00000000301	627	88	13588	2.9552	0.995827	0.162007	3.97546
GOTERM_CC_FAT	GO:0042598~vesicular fraction	18	1.92926	0.00303835	ENSMUSG00000074254, ENSMUSG00000055980, ENSMUSG00000056035, ENSMUSG00000069456, ENSMUSG00000036833, ENSMUSG00000038489, ENSMUSG00000054630, ENSMUSG00000027983, ENSMUSG00000046070, ENSMUSG00000037601, ENSMUSG00000038541, ENSMUSG00000028713, ENSMUSG00000023963, ENSMUSG00000024981, ENSMUSG00000030671, ENSMUSG00000021594, ENSMUSG00000033487, ENSMUSG00000010936	556	182	12504	2.22421	0.668656	0.0814594	4.09803
GOTERM_BP_FAT	GO:0042775~mitochondrial ATP synthesis coupled electron transport	5	0.535906	0.00308471	ENSMUSG00000064356, ENSMUSG00000021520, ENSMUSG00000064357, ENSMUSG00000031393, ENSMUSG00000064358, ENSMUSG00000064345, ENSMUSG00000064363	627	14	13588	7.7398	0.999335	0.20437	5.27245
INTERPRO	IPR007087:Zinc finger, C2H2-type	48	5.14469	0.00350045	ENSMUSG00000018678, ENSMUSG00000027551, ENSMUSG00000028799, ENSMUSG00000029178, ENSMUSG00000049295, ENSMUSG00000046404, ENSMUSG00000032582, ENSMUSG00000048921, ENSMUSG00000040721, ENSMUSG00000072294, ENSMUSG00000051550, ENSMUSG00000022508, ENSMUSG00000039634, ENSMUSG00000038418, ENSMUSG00000058886, ENSMUSG00000021366, ENSMUSG00000027016, ENSMUSG00000031665, ENSMUSG00000055148, ENSMUSG00000047907,…	816	681	17763	1.53434	0.987732	0.769367	5.54117
KEGG_PATHWAY	mmu03320:PPAR signaling pathway	11	1.17899	0.00473906	ENSMUSG00000019874, ENSMUSG00000027875, ENSMUSG00000015846, ENSMUSG00000025203, ENSMUSG00000038489, ENSMUSG00000037071, ENSMUSG00000024981, ENSMUSG00000062515, ENSMUSG00000032081, ENSMUSG00000055553, ENSMUSG00000032083	281	79	5738	2.84328	0.532358	0.316156	5.57455
KEGG_PATHWAY	mmu00564:Glycerophospholipid metabolism	10	1.07181	0.00488131	ENSMUSG00000000276, ENSMUSG00000040479, ENSMUSG00000023452, ENSMUSG00000034731, ENSMUSG00000079334, ENSMUSG00000030682, ENSMUSG00000042632, ENSMUSG00000034254, ENSMUSG00000026922, ENSMUSG00000000301	281	67	5738	3.04775	0.542932	0.229699	5.73739
GOTERM_CC_FAT	GO:0015629~actin cytoskeleton	19	2.03644	0.00451026	ENSMUSG00000020483, ENSMUSG00000038976, ENSMUSG00000024397, ENSMUSG00000024236, ENSMUSG00000030739, ENSMUSG00000029621, ENSMUSG00000029761, ENSMUSG00000075284, ENSMUSG00000028649, ENSMUSG00000028464, ENSMUSG00000032827, ENSMUSG00000044042, ENSMUSG00000043079, ENSMUSG00000029684, ENSMUSG00000040093, ENSMUSG00000056201, ENSMUSG00000020315, ENSMUSG00000018417, ENSMUSG00000026131	556	205	12504	2.08437	0.8062	0.110601	6.0268
INTERPRO	IPR000504:RNA recognition motif, RNP-1	20	2.14362	0.00418799	ENSMUSG00000034120, ENSMUSG00000006498, ENSMUSG00000032582, ENSMUSG00000032387, ENSMUSG00000060373, ENSMUSG00000078765, ENSMUSG00000042625, ENSMUSG00000038374, ENSMUSG00000029328, ENSMUSG00000031586, ENSMUSG00000029402, ENSMUSG00000038784, ENSMUSG00000006456, ENSMUSG00000022973, ENSMUSG00000031107, ENSMUSG00000068856, ENSMUSG00000061479, ENSMUSG00000046434, ENSMUSG00000058655, ENSMUSG00000010362	816	212	17763	2.05362	0.994841	0.731993	6.5951
GOTERM_BP_FAT	GO:0007015~actin filament organization	9	0.96463	0.00390109	ENSMUSG00000038976, ENSMUSG00000024397, ENSMUSG00000021262, ENSMUSG00000029675, ENSMUSG00000032827, ENSMUSG00000029684, ENSMUSG00000056201, ENSMUSG00000072115, ENSMUSG00000015605	627	56	13588	3.48291	0.999904	0.244579	6.6233
GOTERM_BP_FAT	GO:0030036~actin cytoskeleton organization	17	1.82208	0.00396085	ENSMUSG00000038976, ENSMUSG00000024397, ENSMUSG00000025809, ENSMUSG00000022508, ENSMUSG00000072115, ENSMUSG00000028868, ENSMUSG00000015605, ENSMUSG00000033220, ENSMUSG00000025422, ENSMUSG00000021262, ENSMUSG00000029675, ENSMUSG00000032827, ENSMUSG00000044042, ENSMUSG00000029684, ENSMUSG00000024044, ENSMUSG00000056201, ENSMUSG00000073982	627	165	13588	2.23282	0.999917	0.241498	6.72148
GOTERM_BP_FAT	GO:0042325~regulation of phosphorylation	25	2.67953	0.00403907	ENSMUSG00000000276, ENSMUSG00000055980, ENSMUSG00000038976, ENSMUSG00000028062, ENSMUSG00000017950, ENSMUSG00000034731, ENSMUSG00000062515, ENSMUSG00000024924, ENSMUSG00000025422, ENSMUSG00000057342, ENSMUSG00000042429, ENSMUSG00000031834, ENSMUSG00000029528, ENSMUSG00000040479, ENSMUSG00000033792, ENSMUSG00000036585, ENSMUSG00000046876, ENSMUSG00000033721, ENSMUSG00000008999, ENSMUSG00000057789,…	627	290	13588	1.86823	0.999931	0.239535	6.84982
GOTERM_CC_FAT	GO:0005792~microsome	17	1.82208	0.00516726	ENSMUSG00000074254, ENSMUSG00000055980, ENSMUSG00000056035, ENSMUSG00000069456, ENSMUSG00000036833, ENSMUSG00000038489, ENSMUSG00000054630, ENSMUSG00000027983, ENSMUSG00000046070, ENSMUSG00000037601, ENSMUSG00000038541, ENSMUSG00000028713, ENSMUSG00000023963, ENSMUSG00000024981, ENSMUSG00000030671, ENSMUSG00000021594, ENSMUSG00000010936	556	176	12504	2.17225	0.847498	0.117831	6.87606
INTERPRO	IPR015880:Zinc finger, C2H2-like	47	5.03751	0.00487635	ENSMUSG00000018678, ENSMUSG00000027551, ENSMUSG00000028799, ENSMUSG00000029178, ENSMUSG00000049295, ENSMUSG00000046404, ENSMUSG00000032582, ENSMUSG00000048921, ENSMUSG00000040721, ENSMUSG00000072294, ENSMUSG00000051550, ENSMUSG00000022508, ENSMUSG00000039634, ENSMUSG00000038418, ENSMUSG00000021366, ENSMUSG00000027016, ENSMUSG00000031665, ENSMUSG00000055148, ENSMUSG00000047907, ENSMUSG00000024050,…	816	676	17763	1.51348	0.997834	0.706817	7.63924
GOTERM_BP_FAT	GO:0008654~phospholipid biosynthetic process	11	1.17899	0.00470186	ENSMUSG00000010607, ENSMUSG00000017721, ENSMUSG00000023452, ENSMUSG00000070644, ENSMUSG00000030682, ENSMUSG00000079469, ENSMUSG00000030990, ENSMUSG00000034254, ENSMUSG00000026922, ENSMUSG00000000301, ENSMUSG00000057342	627	83	13588	2.87212	0.999986	0.266559	7.93068
GOTERM_BP_FAT	GO:0030168~platelet activation	5	0.535906	0.00521179	ENSMUSG00000015085, ENSMUSG00000021262, ENSMUSG00000033831, ENSMUSG00000027249, ENSMUSG00000020120	627	16	13588	6.77233	0.999996	0.284252	8.75419
GOTERM_CC_FAT	GO:0005624~membrane fraction	36	3.85852	0.00701378	ENSMUSG00000074254, ENSMUSG00000069456, ENSMUSG00000036833, ENSMUSG00000025809, ENSMUSG00000038489, ENSMUSG00000021661, ENSMUSG00000029761, ENSMUSG00000027983, ENSMUSG00000046070, ENSMUSG00000024924, ENSMUSG00000022822, ENSMUSG00000037601, ENSMUSG00000025429, ENSMUSG00000033792, ENSMUSG00000003378, ENSMUSG00000024981, ENSMUSG00000021594, ENSMUSG00000046447, ENSMUSG00000010936, ENSMUSG00000039431,…	556	510	12504	1.58747	0.922306	0.147588	9.22496
GOTERM_CC_FAT	GO:0005626~insoluble fraction	37	3.9657	0.0071709	ENSMUSG00000074254, ENSMUSG00000069456, ENSMUSG00000036833, ENSMUSG00000025809, ENSMUSG00000038489, ENSMUSG00000021661, ENSMUSG00000029761, ENSMUSG00000027983, ENSMUSG00000046070, ENSMUSG00000024924, ENSMUSG00000022822, ENSMUSG00000037601, ENSMUSG00000025429, ENSMUSG00000033792, ENSMUSG00000003378, ENSMUSG00000024981, ENSMUSG00000032060, ENSMUSG00000021594, ENSMUSG00000046447, ENSMUSG00000010936,…	556	528	12504	1.57595	0.926643	0.142446	9.42227
INTERPRO	IPR001750:NADH:ubiquinone/plastoquinone oxidoreductase	3	0.321543	0.00611555	ENSMUSG00000064367, ENSMUSG00000064345, ENSMUSG00000064363	816	3	17763	21.7684	0.999547	0.722822	9.49135
GOTERM_CC_FAT	GO:0044420~extracellular matrix part	11	1.17899	0.00750855	ENSMUSG00000015085, ENSMUSG00000001435, ENSMUSG00000026042, ENSMUSG00000028339, ENSMUSG00000004098, ENSMUSG00000024421, ENSMUSG00000029368, ENSMUSG00000072115, ENSMUSG00000031954, ENSMUSG00000032796, ENSMUSG00000041782	556	92	12504	2.68893	0.935164	0.141006	9.84494
GOTERM_BP_FAT	GO:0032956~regulation of actin cytoskeleton organization	9	0.96463	0.0059849	ENSMUSG00000026755, ENSMUSG00000021262, ENSMUSG00000029675, ENSMUSG00000044042, ENSMUSG00000043079, ENSMUSG00000029621, ENSMUSG00000020315, ENSMUSG00000056201, ENSMUSG00000020120	627	60	13588	3.25072	0.999999	0.312074	9.98949
GOTERM_CC_FAT	GO:0070469~respiratory chain	9	0.96463	0.00779228	ENSMUSG00000064341, ENSMUSG00000021520, ENSMUSG00000064367, ENSMUSG00000024248, ENSMUSG00000064351, ENSMUSG00000064370, ENSMUSG00000064345, ENSMUSG00000064363, ENSMUSG00000064354	556	65	12504	3.11389	0.941555	0.138824	10.1987
GOTERM_BP_FAT	GO:0051174~regulation of phosphorus metabolic process	25	2.67953	0.00640172	ENSMUSG00000000276, ENSMUSG00000055980, ENSMUSG00000038976, ENSMUSG00000028062, ENSMUSG00000017950, ENSMUSG00000034731, ENSMUSG00000062515, ENSMUSG00000024924, ENSMUSG00000025422, ENSMUSG00000057342, ENSMUSG00000042429, ENSMUSG00000031834, ENSMUSG00000029528, ENSMUSG00000040479, ENSMUSG00000033792, ENSMUSG00000036585, ENSMUSG00000046876, ENSMUSG00000033721, ENSMUSG00000008999, ENSMUSG00000057789,…	627	301	13588	1.79995	1	0.322909	10.6489
GOTERM_BP_FAT	GO:0019220~regulation of phosphate metabolic process	25	2.67953	0.00640172	ENSMUSG00000000276, ENSMUSG00000055980, ENSMUSG00000038976, ENSMUSG00000028062, ENSMUSG00000017950, ENSMUSG00000034731, ENSMUSG00000062515, ENSMUSG00000024924, ENSMUSG00000025422, ENSMUSG00000057342, ENSMUSG00000042429, ENSMUSG00000031834, ENSMUSG00000029528, ENSMUSG00000040479, ENSMUSG00000033792, ENSMUSG00000036585, ENSMUSG00000046876, ENSMUSG00000033721, ENSMUSG00000008999, ENSMUSG00000057789,…	627	301	13588	1.79995	1	0.322909	10.6489
GOTERM_BP_FAT	GO:0032970~regulation of actin filament-based process	9	0.96463	0.00661787	ENSMUSG00000026755, ENSMUSG00000021262, ENSMUSG00000029675, ENSMUSG00000044042, ENSMUSG00000043079, ENSMUSG00000029621, ENSMUSG00000020315, ENSMUSG00000056201, ENSMUSG00000020120	627	61	13588	3.19743	1	0.325025	10.9891
GOTERM_CC_FAT	GO:0030055~cell-substrate junction	9	0.96463	0.00853276	ENSMUSG00000037003, ENSMUSG00000029528, ENSMUSG00000052698, ENSMUSG00000030774, ENSMUSG00000021262, ENSMUSG00000034664, ENSMUSG00000029860, ENSMUSG00000026131, ENSMUSG00000031216	556	66	12504	3.06671	0.955429	0.144042	11.1159
GOTERM_CC_FAT	GO:0033279~ribosomal subunit	9	0.96463	0.00853276	ENSMUSG00000021607, ENSMUSG00000047215, ENSMUSG00000034880, ENSMUSG00000010406, ENSMUSG00000063888, ENSMUSG00000030744, ENSMUSG00000061474, ENSMUSG00000001445, ENSMUSG00000049517	556	66	12504	3.06671	0.955429	0.144042	11.1159
GOTERM_CC_FAT	GO:0005740~mitochondrial envelope	29	3.10825	0.00873448	ENSMUSG00000005674, ENSMUSG00000018677, ENSMUSG00000024248, ENSMUSG00000064345, ENSMUSG00000025733, ENSMUSG00000064341, ENSMUSG00000024527, ENSMUSG00000064367, ENSMUSG00000024981, ENSMUSG00000057789, ENSMUSG00000034248, ENSMUSG00000022299, ENSMUSG00000025270, ENSMUSG00000054630, ENSMUSG00000064351, ENSMUSG00000045316, ENSMUSG00000064370, ENSMUSG00000078713, ENSMUSG00000000301, ENSMUSG00000064354,…	556	391	12504	1.668	0.958603	0.140707	11.3642
GOTERM_BP_FAT	GO:0007548~sex differentiation	14	1.50054	0.00693312	ENSMUSG00000038541, ENSMUSG00000026311, ENSMUSG00000022868, ENSMUSG00000018604, ENSMUSG00000039117, ENSMUSG00000017950, ENSMUSG00000016758, ENSMUSG00000021765, ENSMUSG00000024990, ENSMUSG00000021594, ENSMUSG00000057722, ENSMUSG00000024985, ENSMUSG00000024949, ENSMUSG00000033487	627	130	13588	2.33385	1	0.330902	11.4831
GOTERM_CC_FAT	GO:0005761~mitochondrial ribosome	7	0.750268	0.0089117	ENSMUSG00000021607, ENSMUSG00000034880, ENSMUSG00000010406, ENSMUSG00000021967, ENSMUSG00000026087, ENSMUSG00000061474, ENSMUSG00000001445	556	41	12504	3.83962	0.961204	0.137312	11.5819
GOTERM_CC_FAT	GO:0000313~organellar ribosome	7	0.750268	0.0089117	ENSMUSG00000021607, ENSMUSG00000034880, ENSMUSG00000010406, ENSMUSG00000021967, ENSMUSG00000026087, ENSMUSG00000061474, ENSMUSG00000001445	556	41	12504	3.83962	0.961204	0.137312	11.5819
KEGG_PATHWAY	mmu04610:Complement and coagulation cascades	10	1.07181	0.0102148	ENSMUSG00000061780, ENSMUSG00000072849, ENSMUSG00000022875, ENSMUSG00000033831, ENSMUSG00000040552, ENSMUSG00000032679, ENSMUSG00000038521, ENSMUSG00000027249, ENSMUSG00000068686, ENSMUSG00000031444	281	75	5738	2.72266	0.806557	0.336809	11.66
GOTERM_BP_FAT	GO:0006916~anti-apoptosis	11	1.17899	0.00711312	ENSMUSG00000018604, ENSMUSG00000025001, ENSMUSG00000029535, ENSMUSG00000042292, ENSMUSG00000020053, ENSMUSG00000039910, ENSMUSG00000030847, ENSMUSG00000022174, ENSMUSG00000030990, ENSMUSG00000031954, ENSMUSG00000057342	627	88	13588	2.70893	1	0.331339	11.7639
GOTERM_BP_FAT	GO:0032535~regulation of cellular component size	16	1.7149	0.00745445	ENSMUSG00000029621, ENSMUSG00000056493, ENSMUSG00000050541, ENSMUSG00000026755, ENSMUSG00000022868, ENSMUSG00000021262, ENSMUSG00000029675, ENSMUSG00000044042, ENSMUSG00000002083, ENSMUSG00000004798, ENSMUSG00000056201, ENSMUSG00000020315, ENSMUSG00000030168, ENSMUSG00000062762, ENSMUSG00000028755, ENSMUSG00000020120	627	161	13588	2.15368	1	0.33771	12.2942
GOTERM_BP_FAT	GO:0008064~regulation of actin polymerization or depolymerization	8	0.857449	0.00759115	ENSMUSG00000026755, ENSMUSG00000021262, ENSMUSG00000029675, ENSMUSG00000044042, ENSMUSG00000029621, ENSMUSG00000020315, ENSMUSG00000056201, ENSMUSG00000020120	627	50	13588	3.46743	1	0.336417	12.5058
GOTERM_CC_FAT	GO:0005654~nucleoplasm	40	4.28725	0.0105259	ENSMUSG00000034120, ENSMUSG00000000134, ENSMUSG00000017950, ENSMUSG00000038489, ENSMUSG00000078765, ENSMUSG00000028809, ENSMUSG00000028266, ENSMUSG00000018068, ENSMUSG00000058886, ENSMUSG00000032897, ENSMUSG00000020248, ENSMUSG00000061436, ENSMUSG00000018537, ENSMUSG00000039117, ENSMUSG00000031681, ENSMUSG00000022109, ENSMUSG00000026077, ENSMUSG00000040964, ENSMUSG00000046876, ENSMUSG00000031314,…	556	599	12504	1.50178	0.978531	0.153806	13.5417
GOTERM_CC_FAT	GO:0031090~organelle membrane	51	5.46624	0.0105329	ENSMUSG00000018677, ENSMUSG00000004319, ENSMUSG00000036833, ENSMUSG00000064345, ENSMUSG00000028538, ENSMUSG00000017721, ENSMUSG00000064341, ENSMUSG00000024527, ENSMUSG00000071657, ENSMUSG00000034248, ENSMUSG00000028581, ENSMUSG00000010936, ENSMUSG00000026925, ENSMUSG00000022299, ENSMUSG00000079469, ENSMUSG00000064370, ENSMUSG00000040188, ENSMUSG00000008604, ENSMUSG00000025351, ENSMUSG00000027875,…	556	809	12504	1.41774	0.978586	0.147988	13.5501
GOTERM_BP_FAT	GO:0001525~angiogenesis	14	1.50054	0.00835374	ENSMUSG00000001435, ENSMUSG00000042677, ENSMUSG00000031465, ENSMUSG00000072115, ENSMUSG00000030123, ENSMUSG00000028868, ENSMUSG00000057722, ENSMUSG00000015605, ENSMUSG00000008398, ENSMUSG00000038742, ENSMUSG00000026814, ENSMUSG00000036585, ENSMUSG00000046470, ENSMUSG00000026921	627	133	13588	2.28121	1	0.356889	13.677
GOTERM_BP_FAT	GO:0030832~regulation of actin filament length	8	0.857449	0.00845861	ENSMUSG00000026755, ENSMUSG00000021262, ENSMUSG00000029675, ENSMUSG00000044042, ENSMUSG00000029621, ENSMUSG00000020315, ENSMUSG00000056201, ENSMUSG00000020120	627	51	13588	3.39944	1	0.354214	13.837
GOTERM_BP_FAT	GO:0032147~activation of protein kinase activity	8	0.857449	0.00845861	ENSMUSG00000000276, ENSMUSG00000042429, ENSMUSG00000040479, ENSMUSG00000028062, ENSMUSG00000034731, ENSMUSG00000004221, ENSMUSG00000032578, ENSMUSG00000057342	627	51	13588	3.39944	1	0.354214	13.837
INTERPRO	IPR012677:Nucleotide-binding, alpha-beta plait	19	2.03644	0.00943177	ENSMUSG00000034120, ENSMUSG00000006498, ENSMUSG00000032582, ENSMUSG00000032387, ENSMUSG00000060373, ENSMUSG00000078765, ENSMUSG00000042625, ENSMUSG00000038374, ENSMUSG00000029328, ENSMUSG00000031586, ENSMUSG00000029402, ENSMUSG00000038784, ENSMUSG00000006456, ENSMUSG00000031107, ENSMUSG00000068856, ENSMUSG00000061479, ENSMUSG00000046434, ENSMUSG00000058655, ENSMUSG00000010362	816	213	17763	1.94178	0.999993	0.817135	14.2778
GOTERM_BP_FAT	GO:0007010~cytoskeleton organization	26	2.78671	0.00883359	ENSMUSG00000025809, ENSMUSG00000022508, ENSMUSG00000028868, ENSMUSG00000025422, ENSMUSG00000030137, ENSMUSG00000029528, ENSMUSG00000021262, ENSMUSG00000025429, ENSMUSG00000044042, ENSMUSG00000043079, ENSMUSG00000029684, ENSMUSG00000032735, ENSMUSG00000026131, ENSMUSG00000038976, ENSMUSG00000027394, ENSMUSG00000024397, ENSMUSG00000024236, ENSMUSG00000072115, ENSMUSG00000033220, ENSMUSG00000015605,…	627	326	13588	1.7284	1	0.360482	14.4065
GOTERM_CC_FAT	GO:0044421~extracellular region part	49	5.25188	0.0112663	ENSMUSG00000004098, ENSMUSG00000024421, ENSMUSG00000017344, ENSMUSG00000033831, ENSMUSG00000020053, ENSMUSG00000029417, ENSMUSG00000024990, ENSMUSG00000046070, ENSMUSG00000024924, ENSMUSG00000033307, ENSMUSG00000023206, ENSMUSG00000022868, ENSMUSG00000061780, ENSMUSG00000048368, ENSMUSG00000042423, ENSMUSG00000057400, ENSMUSG00000008999, ENSMUSG00000032796, ENSMUSG00000028600, ENSMUSG00000032081,…	556	774	12504	1.42374	0.98364	0.151695	14.4271
GOTERM_BP_FAT	GO:0051347~positive regulation of transferase activity	14	1.50054	0.0094215	ENSMUSG00000000276, ENSMUSG00000055980, ENSMUSG00000028062, ENSMUSG00000034731, ENSMUSG00000024924, ENSMUSG00000025422, ENSMUSG00000057342, ENSMUSG00000042429, ENSMUSG00000029528, ENSMUSG00000040479, ENSMUSG00000033721, ENSMUSG00000004221, ENSMUSG00000032083, ENSMUSG00000032578	627	135	13588	2.24741	1	0.373118	15.2922
GOTERM_CC_FAT	GO:0005925~focal adhesion	8	0.857449	0.0126245	ENSMUSG00000037003, ENSMUSG00000029528, ENSMUSG00000052698, ENSMUSG00000030774, ENSMUSG00000021262, ENSMUSG00000034664, ENSMUSG00000029860, ENSMUSG00000031216	556	57	12504	3.15638	0.990067	0.162538	16.0294
GOTERM_MF_FAT	GO:0008270~zinc ion binding	120	12.8617	0.0114888	ENSMUSG00000021127, ENSMUSG00000029178, ENSMUSG00000066440, ENSMUSG00000032582, ENSMUSG00000022508, ENSMUSG00000039634, ENSMUSG00000038418, ENSMUSG00000020889, ENSMUSG00000001844, ENSMUSG00000055148, ENSMUSG00000024050, ENSMUSG00000059474, ENSMUSG00000030087, ENSMUSG00000073423, ENSMUSG00000025786, ENSMUSG00000000276, ENSMUSG00000072872, ENSMUSG00000055917, ENSMUSG00000044968, ENSMUSG00000049764,…	619	2105	13288	1.22377	0.999767	0.697342	16.0583
GOTERM_BP_FAT	GO:0007205~activation of protein kinase C activity by G-protein coupled receptor protein signaling pathway	5	0.535906	0.00994741	ENSMUSG00000000276, ENSMUSG00000040479, ENSMUSG00000034731, ENSMUSG00000032578, ENSMUSG00000057342	627	19	13588	5.70301	1	0.383151	16.0772
GOTERM_BP_FAT	GO:0046546~development of primary male sexual characteristics	8	0.857449	0.0104088	ENSMUSG00000038541, ENSMUSG00000026311, ENSMUSG00000022868, ENSMUSG00000018604, ENSMUSG00000016758, ENSMUSG00000024990, ENSMUSG00000024949, ENSMUSG00000033487	627	53	13588	3.27116	1	0.390761	16.7603
GOTERM_BP_FAT	GO:0045792~negative regulation of cell size	8	0.857449	0.0104088	ENSMUSG00000022868, ENSMUSG00000002083, ENSMUSG00000004798, ENSMUSG00000056201, ENSMUSG00000030168, ENSMUSG00000056493, ENSMUSG00000028755, ENSMUSG00000062762	627	53	13588	3.27116	1	0.390761	16.7603
GOTERM_BP_FAT	GO:0006351~transcription, DNA-dependent	13	1.39335	0.0105216	ENSMUSG00000049295, ENSMUSG00000039117, ENSMUSG00000024218, ENSMUSG00000052040, ENSMUSG00000038489, ENSMUSG00000070002, ENSMUSG00000026803, ENSMUSG00000031314, ENSMUSG00000072115, ENSMUSG00000028266, ENSMUSG00000052293, ENSMUSG00000058886, ENSMUSG00000047371	627	122	13588	2.30925	1	0.38806	16.9265
GOTERM_MF_FAT	GO:0033765~steroid dehydrogenase activity, acting on the CH-CH group of donors	3	0.321543	0.0121709	ENSMUSG00000038541, ENSMUSG00000038641, ENSMUSG00000021594	619	4	13288	16.1002	0.999859	0.669854	16.9314
GOTERM_MF_FAT	GO:0043169~cation binding	207	22.1865	0.0127389	ENSMUSG00000021127, ENSMUSG00000029178, ENSMUSG00000025203, ENSMUSG00000022508, ENSMUSG00000029781, ENSMUSG00000038418, ENSMUSG00000036438, ENSMUSG00000059474, ENSMUSG00000073423, ENSMUSG00000000276, ENSMUSG00000025786, ENSMUSG00000072872, ENSMUSG00000055917, ENSMUSG00000044968, ENSMUSG00000026749, ENSMUSG00000033623, ENSMUSG00000036442, ENSMUSG00000029368, ENSMUSG00000042439, ENSMUSG00000020805,…	619	3885	13288	1.1438	0.999907	0.643476	17.652
GOTERM_BP_FAT	GO:0008380~RNA splicing	18	1.92926	0.0116327	ENSMUSG00000034120, ENSMUSG00000021413, ENSMUSG00000006498, ENSMUSG00000060373, ENSMUSG00000078765, ENSMUSG00000028809, ENSMUSG00000038374, ENSMUSG00000028639, ENSMUSG00000024949, ENSMUSG00000047656, ENSMUSG00000029402, ENSMUSG00000063480, ENSMUSG00000009076, ENSMUSG00000068856, ENSMUSG00000044709, ENSMUSG00000061479, ENSMUSG00000020211, ENSMUSG00000046434	627	201	13588	1.94073	1	0.413064	18.5468
GOTERM_CC_FAT	GO:0044432~endoplasmic reticulum part	19	2.03644	0.0148495	ENSMUSG00000026833, ENSMUSG00000069456, ENSMUSG00000069922, ENSMUSG00000036833, ENSMUSG00000029767, ENSMUSG00000005973, ENSMUSG00000032245, ENSMUSG00000079469, ENSMUSG00000029781, ENSMUSG00000008604, ENSMUSG00000000301, ENSMUSG00000017721, ENSMUSG00000037470, ENSMUSG00000057400, ENSMUSG00000071657, ENSMUSG00000030990, ENSMUSG00000026047, ENSMUSG00000021143, ENSMUSG00000018559	556	231	12504	1.84976	0.99562	0.182202	18.5943
GOTERM_CC_FAT	GO:0030864~cortical actin cytoskeleton	5	0.535906	0.0148507	ENSMUSG00000038976, ENSMUSG00000032827, ENSMUSG00000029761, ENSMUSG00000020315, ENSMUSG00000056201	556	22	12504	5.11118	0.995622	0.176319	18.5957
GOTERM_BP_FAT	GO:0010941~regulation of cell death	39	4.18006	0.0117335	ENSMUSG00000019851, ENSMUSG00000007872, ENSMUSG00000042292, ENSMUSG00000020053, ENSMUSG00000022508, ENSMUSG00000000282, ENSMUSG00000042429, ENSMUSG00000031393, ENSMUSG00000061436, ENSMUSG00000018604, ENSMUSG00000018537, ENSMUSG00000028289, ENSMUSG00000033792, ENSMUSG00000008999, ENSMUSG00000057789, ENSMUSG00000040093, ENSMUSG00000030990, ENSMUSG00000068686, ENSMUSG00000062762, ENSMUSG00000020857,…	627	563	13588	1.50122	1	0.40983	18.6924
GOTERM_MF_FAT	GO:0043167~ion binding	209	22.4009	0.0137341	ENSMUSG00000021127, ENSMUSG00000029178, ENSMUSG00000004319, ENSMUSG00000025203, ENSMUSG00000022508, ENSMUSG00000029781, ENSMUSG00000038418, ENSMUSG00000036438, ENSMUSG00000059474, ENSMUSG00000073423, ENSMUSG00000000276, ENSMUSG00000025786, ENSMUSG00000072872, ENSMUSG00000055917, ENSMUSG00000044968, ENSMUSG00000026749, ENSMUSG00000033623, ENSMUSG00000036442, ENSMUSG00000029368, ENSMUSG00000042439,…	619	3934	13288	1.14046	0.999955	0.632576	18.9006
GOTERM_CC_FAT	GO:0005739~mitochondrion	76	8.14577	0.0152606	ENSMUSG00000027203, ENSMUSG00000018677, ENSMUSG00000023452, ENSMUSG00000020935, ENSMUSG00000036833, ENSMUSG00000038967, ENSMUSG00000029518, ENSMUSG00000063730, ENSMUSG00000064345, ENSMUSG00000064341, ENSMUSG00000024527, ENSMUSG00000067847, ENSMUSG00000021967, ENSMUSG00000020334, ENSMUSG00000057666, ENSMUSG00000021217, ENSMUSG00000023020, ENSMUSG00000034248, ENSMUSG00000034424, ENSMUSG00000022299,…	556	1322	12504	1.29287	0.996236	0.1751	19.0602
GOTERM_CC_FAT	GO:0005604~basement membrane	9	0.96463	0.0152714	ENSMUSG00000015085, ENSMUSG00000001435, ENSMUSG00000028339, ENSMUSG00000024421, ENSMUSG00000029368, ENSMUSG00000072115, ENSMUSG00000031954, ENSMUSG00000032796, ENSMUSG00000041782	556	73	12504	2.77264	0.996251	0.1699	19.0724
GOTERM_MF_FAT	GO:0046872~metal ion binding	205	21.9721	0.0139721	ENSMUSG00000021127, ENSMUSG00000029178, ENSMUSG00000025203, ENSMUSG00000022508, ENSMUSG00000029781, ENSMUSG00000038418, ENSMUSG00000036438, ENSMUSG00000059474, ENSMUSG00000073423, ENSMUSG00000000276, ENSMUSG00000025786, ENSMUSG00000072872, ENSMUSG00000055917, ENSMUSG00000044968, ENSMUSG00000026749, ENSMUSG00000033623, ENSMUSG00000036442, ENSMUSG00000029368, ENSMUSG00000042439, ENSMUSG00000020805,…	619	3850	13288	1.14304	0.999962	0.603905	19.1966
INTERPRO	IPR000886:Endoplasmic reticulum, targeting sequence	7	0.750268	0.0131074	ENSMUSG00000037470, ENSMUSG00000030968, ENSMUSG00000026833, ENSMUSG00000029103, ENSMUSG00000005973, ENSMUSG00000029781, ENSMUSG00000026047	816	43	17763	3.54369	1	0.873792	19.305
KEGG_PATHWAY	mmu04810:Regulation of actin cytoskeleton	19	2.03644	0.0185096	ENSMUSG00000036402, ENSMUSG00000030739, ENSMUSG00000025809, ENSMUSG00000029621, ENSMUSG00000028868, ENSMUSG00000033220, ENSMUSG00000006134, ENSMUSG00000002489, ENSMUSG00000026755, ENSMUSG00000031834, ENSMUSG00000029528, ENSMUSG00000030774, ENSMUSG00000034664, ENSMUSG00000036585, ENSMUSG00000029684, ENSMUSG00000033721, ENSMUSG00000056201, ENSMUSG00000027249, ENSMUSG00000000149	281	217	5738	1.78792	0.949677	0.450011	20.1959
GOTERM_BP_FAT	GO:0032774~RNA biosynthetic process	13	1.39335	0.0133841	ENSMUSG00000049295, ENSMUSG00000039117, ENSMUSG00000024218, ENSMUSG00000052040, ENSMUSG00000038489, ENSMUSG00000070002, ENSMUSG00000026803, ENSMUSG00000031314, ENSMUSG00000072115, ENSMUSG00000028266, ENSMUSG00000052293, ENSMUSG00000058886, ENSMUSG00000047371	627	126	13588	2.23594	1	0.446161	21.0407
INTERPRO	IPR018159:Spectrin/alpha-actinin	6	0.643087	0.0144443	ENSMUSG00000028649, ENSMUSG00000044033, ENSMUSG00000020315, ENSMUSG00000026131, ENSMUSG00000063450, ENSMUSG00000054150	816	32	17763	4.08157	1	0.868515	21.0638
GOTERM_MF_FAT	GO:0008134~transcription factor binding	23	2.46517	0.0155149	ENSMUSG00000003575, ENSMUSG00000004263, ENSMUSG00000009569, ENSMUSG00000017376, ENSMUSG00000041164, ENSMUSG00000072872, ENSMUSG00000027490, ENSMUSG00000017950, ENSMUSG00000007777, ENSMUSG00000007872, ENSMUSG00000054452, ENSMUSG00000042292, ENSMUSG00000040712, ENSMUSG00000028266, ENSMUSG00000061436, ENSMUSG00000031393, ENSMUSG00000006456, ENSMUSG00000060601, ENSMUSG00000053483, ENSMUSG00000040964,…	619	288	13288	1.71437	0.999988	0.610698	21.0907
GOTERM_CC_FAT	GO:0005605~basal lamina	4	0.428725	0.0178282	ENSMUSG00000015085, ENSMUSG00000024421, ENSMUSG00000072115, ENSMUSG00000032796	556	13	12504	6.91976	0.998541	0.189939	21.9145
GOTERM_CC_FAT	GO:0005924~cell-substrate adherens junction	8	0.857449	0.0179157	ENSMUSG00000037003, ENSMUSG00000029528, ENSMUSG00000052698, ENSMUSG00000030774, ENSMUSG00000021262, ENSMUSG00000034664, ENSMUSG00000029860, ENSMUSG00000031216	556	61	12504	2.9494	0.998587	0.185413	22.0101
GOTERM_BP_FAT	GO:0022900~electron transport chain	12	1.28617	0.0141214	ENSMUSG00000028367, ENSMUSG00000064351, ENSMUSG00000064370, ENSMUSG00000064345, ENSMUSG00000079677, ENSMUSG00000064354, ENSMUSG00000064363, ENSMUSG00000064341, ENSMUSG00000064356, ENSMUSG00000021520, ENSMUSG00000031393, ENSMUSG00000064357, ENSMUSG00000064367, ENSMUSG00000064358	627	112	13588	2.32194	1	0.457911	22.0688
GOTERM_MF_FAT	GO:0020037~heme binding	14	1.50054	0.0167387	ENSMUSG00000074254, ENSMUSG00000015224, ENSMUSG00000056035, ENSMUSG00000038489, ENSMUSG00000028356, ENSMUSG00000064351, ENSMUSG00000027983, ENSMUSG00000064354, ENSMUSG00000069919, ENSMUSG00000028713, ENSMUSG00000025197, ENSMUSG00000023963, ENSMUSG00000020810, ENSMUSG00000030895, ENSMUSG00000069917	619	144	13288	2.08706	0.999995	0.609414	22.5638
GOTERM_BP_FAT	GO:0042981~regulation of apoptosis	38	4.07288	0.0145085	ENSMUSG00000019851, ENSMUSG00000007872, ENSMUSG00000042292, ENSMUSG00000020053, ENSMUSG00000022508, ENSMUSG00000000282, ENSMUSG00000042429, ENSMUSG00000031393, ENSMUSG00000061436, ENSMUSG00000018604, ENSMUSG00000018537, ENSMUSG00000028289, ENSMUSG00000033792, ENSMUSG00000008999, ENSMUSG00000057789, ENSMUSG00000040093, ENSMUSG00000030990, ENSMUSG00000062762, ENSMUSG00000020857, ENSMUSG00000001435,…	627	553	13588	1.48918	1	0.460976	22.6035
GOTERM_BP_FAT	GO:0015980~energy derivation by oxidation of organic compounds	11	1.17899	0.014694	ENSMUSG00000064356, ENSMUSG00000021520, ENSMUSG00000064357, ENSMUSG00000031393, ENSMUSG00000064358, ENSMUSG00000064367, ENSMUSG00000031902, ENSMUSG00000064351, ENSMUSG00000064370, ENSMUSG00000064345, ENSMUSG00000003865, ENSMUSG00000064363, ENSMUSG00000064354	627	98	13588	2.43251	1	0.459345	22.8585
GOTERM_BP_FAT	GO:0007507~heart development	19	2.03644	0.0150011	ENSMUSG00000009569, ENSMUSG00000007817, ENSMUSG00000007872, ENSMUSG00000025809, ENSMUSG00000024990, ENSMUSG00000022587, ENSMUSG00000015605, ENSMUSG00000006134, ENSMUSG00000050541, ENSMUSG00000003865, ENSMUSG00000037992, ENSMUSG00000018604, ENSMUSG00000031902, ENSMUSG00000015846, ENSMUSG00000024713, ENSMUSG00000026814, ENSMUSG00000039910, ENSMUSG00000008855, ENSMUSG00000023991	627	223	13588	1.84645	1	0.460492	23.279
GOTERM_BP_FAT	GO:0051252~regulation of RNA metabolic process	87	9.32476	0.0151874	ENSMUSG00000003575, ENSMUSG00000004263, ENSMUSG00000009569, ENSMUSG00000021127, ENSMUSG00000000134, ENSMUSG00000049086, ENSMUSG00000003949, ENSMUSG00000072294, ENSMUSG00000040721, ENSMUSG00000022508, ENSMUSG00000039634, ENSMUSG00000038418, ENSMUSG00000020889, ENSMUSG00000000282, ENSMUSG00000021366, ENSMUSG00000038415, ENSMUSG00000037992, ENSMUSG00000031393, ENSMUSG00000026436, ENSMUSG00000018537,…	627	1488	13588	1.26708	1	0.458943	23.533
GOTERM_BP_FAT	GO:0046661~male sex differentiation	8	0.857449	0.0152577	ENSMUSG00000038541, ENSMUSG00000026311, ENSMUSG00000022868, ENSMUSG00000018604, ENSMUSG00000016758, ENSMUSG00000024990, ENSMUSG00000024949, ENSMUSG00000033487	627	57	13588	3.04161	1	0.454913	23.6286
GOTERM_MF_FAT	GO:0005506~iron ion binding	26	2.78671	0.0177195	ENSMUSG00000074254, ENSMUSG00000015224, ENSMUSG00000025203, ENSMUSG00000038489, ENSMUSG00000037071, ENSMUSG00000027983, ENSMUSG00000036073, ENSMUSG00000069919, ENSMUSG00000025197, ENSMUSG00000033022, ENSMUSG00000020810, ENSMUSG00000069917, ENSMUSG00000034248, ENSMUSG00000056035, ENSMUSG00000050708, ENSMUSG00000028356, ENSMUSG00000064351, ENSMUSG00000064370, ENSMUSG00000022292, ENSMUSG00000064354,…	619	343	13288	1.62723	0.999998	0.603296	23.7256
INTERPRO	IPR002017:Spectrin repeat	5	0.535906	0.0166274	ENSMUSG00000028649, ENSMUSG00000020315, ENSMUSG00000026131, ENSMUSG00000063450, ENSMUSG00000054150	816	22	17763	4.94736	1	0.878066	23.8588
GOTERM_BP_FAT	GO:0031327~negative regulation of cellular biosynthetic process	31	3.32262	0.0155624	ENSMUSG00000020091, ENSMUSG00000004263, ENSMUSG00000054452, ENSMUSG00000007872, ENSMUSG00000026511, ENSMUSG00000028367, ENSMUSG00000072294, ENSMUSG00000018697, ENSMUSG00000022508, ENSMUSG00000038418, ENSMUSG00000056493, ENSMUSG00000021366, ENSMUSG00000031393, ENSMUSG00000061436, ENSMUSG00000037992, ENSMUSG00000045294, ENSMUSG00000018537, ENSMUSG00000018604, ENSMUSG00000026803, ENSMUSG00000046876,…	627	430	13588	1.56236	1	0.456038	24.0418
GOTERM_BP_FAT	GO:0030705~cytoskeleton-dependent intracellular transport	6	0.643087	0.0166327	ENSMUSG00000021262, ENSMUSG00000030739, ENSMUSG00000028868, ENSMUSG00000025733, ENSMUSG00000075284, ENSMUSG00000026131	627	33	13588	3.94026	1	0.473026	25.4768
GOTERM_BP_FAT	GO:0033674~positive regulation of kinase activity	13	1.39335	0.0168062	ENSMUSG00000000276, ENSMUSG00000055980, ENSMUSG00000028062, ENSMUSG00000034731, ENSMUSG00000024924, ENSMUSG00000025422, ENSMUSG00000057342, ENSMUSG00000042429, ENSMUSG00000029528, ENSMUSG00000040479, ENSMUSG00000033721, ENSMUSG00000004221, ENSMUSG00000032578	627	130	13588	2.16715	1	0.47116	25.7071
GOTERM_BP_FAT	GO:0048608~reproductive structure development	13	1.39335	0.0168062	ENSMUSG00000022868, ENSMUSG00000015846, ENSMUSG00000029556, ENSMUSG00000039117, ENSMUSG00000016758, ENSMUSG00000020053, ENSMUSG00000021765, ENSMUSG00000057789, ENSMUSG00000024990, ENSMUSG00000057722, ENSMUSG00000024949, ENSMUSG00000005087, ENSMUSG00000033487	627	130	13588	2.16715	1	0.47116	25.7071
GOTERM_BP_FAT	GO:0006213~pyrimidine nucleoside metabolic process	5	0.535906	0.0168347	ENSMUSG00000020857, ENSMUSG00000037601, ENSMUSG00000027203, ENSMUSG00000022615, ENSMUSG00000028755	627	22	13588	4.92533	1	0.466442	25.7448
GOTERM_BP_FAT	GO:0043067~regulation of programmed cell death	38	4.07288	0.0172166	ENSMUSG00000019851, ENSMUSG00000007872, ENSMUSG00000042292, ENSMUSG00000020053, ENSMUSG00000022508, ENSMUSG00000000282, ENSMUSG00000042429, ENSMUSG00000031393, ENSMUSG00000061436, ENSMUSG00000018604, ENSMUSG00000018537, ENSMUSG00000028289, ENSMUSG00000033792, ENSMUSG00000008999, ENSMUSG00000057789, ENSMUSG00000040093, ENSMUSG00000030990, ENSMUSG00000062762, ENSMUSG00000020857, ENSMUSG00000001435,…	627	560	13588	1.47056	1	0.468831	26.2488
GOTERM_MF_FAT	GO:0003702~RNA polymerase II transcription factor activity	11	1.17899	0.0201435	ENSMUSG00000061650, ENSMUSG00000045248, ENSMUSG00000039117, ENSMUSG00000024218, ENSMUSG00000017950, ENSMUSG00000052040, ENSMUSG00000031681, ENSMUSG00000022109, ENSMUSG00000058886, ENSMUSG00000042406, ENSMUSG00000015776	619	102	13288	2.31506	1	0.625509	26.5278
GOTERM_BP_FAT	GO:0010605~negative regulation of macromolecule metabolic process	35	3.75134	0.0174887	ENSMUSG00000020091, ENSMUSG00000004263, ENSMUSG00000009545, ENSMUSG00000017950, ENSMUSG00000054452, ENSMUSG00000007872, ENSMUSG00000026511, ENSMUSG00000028367, ENSMUSG00000018697, ENSMUSG00000072294, ENSMUSG00000022508, ENSMUSG00000038418, ENSMUSG00000056493, ENSMUSG00000021366, ENSMUSG00000031393, ENSMUSG00000061436, ENSMUSG00000037992, ENSMUSG00000018537, ENSMUSG00000018604, ENSMUSG00000026803,…	627	506	13588	1.49901	1	0.469016	26.606
GOTERM_BP_FAT	GO:0009890~negative regulation of biosynthetic process	31	3.32262	0.0176011	ENSMUSG00000020091, ENSMUSG00000004263, ENSMUSG00000054452, ENSMUSG00000007872, ENSMUSG00000026511, ENSMUSG00000028367, ENSMUSG00000072294, ENSMUSG00000018697, ENSMUSG00000022508, ENSMUSG00000038418, ENSMUSG00000056493, ENSMUSG00000021366, ENSMUSG00000031393, ENSMUSG00000061436, ENSMUSG00000037992, ENSMUSG00000045294, ENSMUSG00000018537, ENSMUSG00000018604, ENSMUSG00000026803, ENSMUSG00000046876,…	627	434	13588	1.54796	1	0.46614	26.7531
GOTERM_BP_FAT	GO:0043085~positive regulation of catalytic activity	21	2.2508	0.0180145	ENSMUSG00000000276, ENSMUSG00000055980, ENSMUSG00000028062, ENSMUSG00000034731, ENSMUSG00000072115, ENSMUSG00000034485, ENSMUSG00000022206, ENSMUSG00000024924, ENSMUSG00000025422, ENSMUSG00000057342, ENSMUSG00000042429, ENSMUSG00000029528, ENSMUSG00000040479, ENSMUSG00000002083, ENSMUSG00000033792, ENSMUSG00000033721, ENSMUSG00000057789, ENSMUSG00000036835, ENSMUSG00000004221, ENSMUSG00000032083,…	627	261	13588	1.74368	1	0.469029	27.2916
GOTERM_CC_FAT	GO:0016323~basolateral plasma membrane	13	1.39335	0.0229707	ENSMUSG00000031216, ENSMUSG00000042429, ENSMUSG00000037003, ENSMUSG00000029528, ENSMUSG00000030774, ENSMUSG00000052698, ENSMUSG00000021262, ENSMUSG00000034664, ENSMUSG00000029860, ENSMUSG00000034254, ENSMUSG00000033739, ENSMUSG00000005087, ENSMUSG00000026131	556	141	12504	2.07347	0.999783	0.225567	27.3526
INTERPRO	IPR001206:Diacylglycerol kinase, catalytic region	4	0.428725	0.0194928	ENSMUSG00000000276, ENSMUSG00000040479, ENSMUSG00000034731, ENSMUSG00000057342	816	13	17763	6.69796	1	0.894169	27.3866
GOTERM_CC_FAT	GO:0031966~mitochondrial membrane	26	2.78671	0.0230977	ENSMUSG00000005674, ENSMUSG00000018677, ENSMUSG00000024248, ENSMUSG00000064345, ENSMUSG00000025733, ENSMUSG00000024527, ENSMUSG00000064341, ENSMUSG00000064367, ENSMUSG00000024981, ENSMUSG00000057789, ENSMUSG00000034248, ENSMUSG00000025270, ENSMUSG00000022299, ENSMUSG00000054630, ENSMUSG00000064351, ENSMUSG00000045316, ENSMUSG00000064370, ENSMUSG00000078713, ENSMUSG00000064354, ENSMUSG00000064356,…	556	368	12504	1.58891	0.999793	0.220805	27.4823
GOTERM_BP_FAT	GO:0010558~negative regulation of macromolecule biosynthetic process	30	3.21543	0.0182711	ENSMUSG00000020091, ENSMUSG00000004263, ENSMUSG00000007872, ENSMUSG00000054452, ENSMUSG00000026511, ENSMUSG00000028367, ENSMUSG00000072294, ENSMUSG00000018697, ENSMUSG00000022508, ENSMUSG00000038418, ENSMUSG00000056493, ENSMUSG00000021366, ENSMUSG00000031393, ENSMUSG00000061436, ENSMUSG00000037992, ENSMUSG00000018537, ENSMUSG00000018604, ENSMUSG00000026803, ENSMUSG00000046876, ENSMUSG00000008855,…	627	418	13588	1.55537	1	0.46892	27.624
GOTERM_CC_FAT	GO:0005743~mitochondrial inner membrane	22	2.35798	0.0233547	ENSMUSG00000018677, ENSMUSG00000022299, ENSMUSG00000024248, ENSMUSG00000025270, ENSMUSG00000054630, ENSMUSG00000064351, ENSMUSG00000045316, ENSMUSG00000064370, ENSMUSG00000025733, ENSMUSG00000064345, ENSMUSG00000064354, ENSMUSG00000064356, ENSMUSG00000064341, ENSMUSG00000024527, ENSMUSG00000064357, ENSMUSG00000021520, ENSMUSG00000064358, ENSMUSG00000027875, ENSMUSG00000064367, ENSMUSG00000013701,…	556	296	12504	1.6715	0.999812	0.21737	27.7443
GOTERM_BP_FAT	GO:0060548~negative regulation of cell death	20	2.14362	0.0185991	ENSMUSG00000020857, ENSMUSG00000042292, ENSMUSG00000020053, ENSMUSG00000022508, ENSMUSG00000030847, ENSMUSG00000020423, ENSMUSG00000057342, ENSMUSG00000042429, ENSMUSG00000061436, ENSMUSG00000031393, ENSMUSG00000018604, ENSMUSG00000018537, ENSMUSG00000029535, ENSMUSG00000025001, ENSMUSG00000029368, ENSMUSG00000039910, ENSMUSG00000030990, ENSMUSG00000031954, ENSMUSG00000022174, ENSMUSG00000068686	627	245	13588	1.7691	1	0.47012	28.0467
GOTERM_CC_FAT	GO:0000267~cell fraction	38	4.07288	0.0242479	ENSMUSG00000074254, ENSMUSG00000069456, ENSMUSG00000036833, ENSMUSG00000038489, ENSMUSG00000025809, ENSMUSG00000021661, ENSMUSG00000029761, ENSMUSG00000027983, ENSMUSG00000046070, ENSMUSG00000024924, ENSMUSG00000022822, ENSMUSG00000037601, ENSMUSG00000025175, ENSMUSG00000025429, ENSMUSG00000033792, ENSMUSG00000003378, ENSMUSG00000024981, ENSMUSG00000032060, ENSMUSG00000021594, ENSMUSG00000046447,…	556	596	12504	1.43388	0.999865	0.21926	28.6476
KEGG_PATHWAY	mmu00983:Drug metabolism	7	0.750268	0.0280189	ENSMUSG00000074254, ENSMUSG00000056035, ENSMUSG00000022615, ENSMUSG00000069922, ENSMUSG00000057400, ENSMUSG00000054630, ENSMUSG00000028755	281	48	5738	2.97791	0.989401	0.531322	29.0472
INTERPRO	IPR009072:Histone-fold	8	0.857449	0.0211682	ENSMUSG00000018102, ENSMUSG00000060678, ENSMUSG00000039117, ENSMUSG00000024218, ENSMUSG00000069305, ENSMUSG00000067455, ENSMUSG00000060743, ENSMUSG00000052293, ENSMUSG00000020248, ENSMUSG00000032897	816	61	17763	2.85487	1	0.893287	29.3776
GOTERM_BP_FAT	GO:0048806~genitalia development	5	0.535906	0.0196544	ENSMUSG00000038541, ENSMUSG00000026311, ENSMUSG00000018604, ENSMUSG00000024990, ENSMUSG00000024985	627	23	13588	4.71119	1	0.484203	29.3912
GOTERM_BP_FAT	GO:0006355~regulation of transcription, DNA-dependent	85	9.1104	0.0196834	ENSMUSG00000003575, ENSMUSG00000004263, ENSMUSG00000009569, ENSMUSG00000000134, ENSMUSG00000049086, ENSMUSG00000003949, ENSMUSG00000072294, ENSMUSG00000040721, ENSMUSG00000022508, ENSMUSG00000039634, ENSMUSG00000038418, ENSMUSG00000020889, ENSMUSG00000000282, ENSMUSG00000021366, ENSMUSG00000038415, ENSMUSG00000037992, ENSMUSG00000031393, ENSMUSG00000026436, ENSMUSG00000018537, ENSMUSG00000018604,…	627	1465	13588	1.25739	1	0.479945	29.4279
KEGG_PATHWAY	mmu03010:Ribosome	10	1.07181	0.0286728	ENSMUSG00000007892, ENSMUSG00000047215, ENSMUSG00000029614, ENSMUSG00000071415, ENSMUSG00000050621, ENSMUSG00000057863, ENSMUSG00000030744, ENSMUSG00000055553, ENSMUSG00000079435, ENSMUSG00000049517	281	89	5738	2.29437	0.990483	0.485705	29.6214
GOTERM_CC_FAT	GO:0031967~organelle envelope	35	3.75134	0.0252605	ENSMUSG00000005674, ENSMUSG00000018677, ENSMUSG00000024248, ENSMUSG00000025733, ENSMUSG00000064345, ENSMUSG00000024527, ENSMUSG00000064341, ENSMUSG00000064367, ENSMUSG00000057789, ENSMUSG00000024981, ENSMUSG00000018559, ENSMUSG00000034248, ENSMUSG00000022299, ENSMUSG00000025270, ENSMUSG00000054630, ENSMUSG00000064351, ENSMUSG00000034485, ENSMUSG00000045316, ENSMUSG00000064370, ENSMUSG00000033220,…	556	540	12504	1.45763	0.999907	0.221985	29.6591
KEGG_PATHWAY	mmu04070:Phosphatidylinositol signaling system	9	0.96463	0.0287966	ENSMUSG00000000276, ENSMUSG00000026925, ENSMUSG00000031834, ENSMUSG00000040479, ENSMUSG00000036438, ENSMUSG00000022973, ENSMUSG00000034731, ENSMUSG00000030228, ENSMUSG00000030682	281	75	5738	2.45039	0.990675	0.442553	29.7297
GOTERM_BP_FAT	GO:0030308~negative regulation of cell growth	7	0.750268	0.0201125	ENSMUSG00000022868, ENSMUSG00000002083, ENSMUSG00000004798, ENSMUSG00000030168, ENSMUSG00000056493, ENSMUSG00000028755, ENSMUSG00000062762	627	47	13588	3.22766	1	0.482666	29.9675
INTERPRO	IPR001723:Steroid hormone receptor	7	0.750268	0.0217796	ENSMUSG00000037992, ENSMUSG00000015846, ENSMUSG00000060601, ENSMUSG00000017950, ENSMUSG00000032238, ENSMUSG00000037583, ENSMUSG00000020889	816	48	17763	3.17456	1	0.880663	30.0913
GOTERM_BP_FAT	GO:0003006~reproductive developmental process	21	2.2508	0.0203754	ENSMUSG00000017950, ENSMUSG00000020053, ENSMUSG00000024990, ENSMUSG00000057722, ENSMUSG00000024949, ENSMUSG00000026311, ENSMUSG00000038541, ENSMUSG00000022868, ENSMUSG00000018604, ENSMUSG00000015846, ENSMUSG00000029556, ENSMUSG00000039117, ENSMUSG00000016758, ENSMUSG00000003810, ENSMUSG00000021765, ENSMUSG00000057789, ENSMUSG00000039910, ENSMUSG00000021594, ENSMUSG00000005087, ENSMUSG00000024985,…	627	264	13588	1.72387	1	0.482501	30.2962
GOTERM_MF_FAT	GO:0046906~tetrapyrrole binding	14	1.50054	0.023805	ENSMUSG00000074254, ENSMUSG00000015224, ENSMUSG00000056035, ENSMUSG00000038489, ENSMUSG00000028356, ENSMUSG00000064351, ENSMUSG00000027983, ENSMUSG00000064354, ENSMUSG00000069919, ENSMUSG00000028713, ENSMUSG00000025197, ENSMUSG00000023963, ENSMUSG00000020810, ENSMUSG00000030895, ENSMUSG00000069917	619	151	13288	1.99031	1	0.663852	30.5786
GOTERM_CC_FAT	GO:0031975~envelope	35	3.75134	0.0266561	ENSMUSG00000005674, ENSMUSG00000018677, ENSMUSG00000024248, ENSMUSG00000025733, ENSMUSG00000064345, ENSMUSG00000024527, ENSMUSG00000064341, ENSMUSG00000064367, ENSMUSG00000057789, ENSMUSG00000024981, ENSMUSG00000018559, ENSMUSG00000034248, ENSMUSG00000022299, ENSMUSG00000025270, ENSMUSG00000054630, ENSMUSG00000064351, ENSMUSG00000034485, ENSMUSG00000045316, ENSMUSG00000064370, ENSMUSG00000033220,…	556	542	12504	1.45226	0.999945	0.227475	31.0315
GOTERM_BP_FAT	GO:0044087~regulation of cellular component biogenesis	10	1.07181	0.0211686	ENSMUSG00000026755, ENSMUSG00000031393, ENSMUSG00000021262, ENSMUSG00000029675, ENSMUSG00000044042, ENSMUSG00000043079, ENSMUSG00000029621, ENSMUSG00000020315, ENSMUSG00000015605, ENSMUSG00000020120	627	89	13588	2.43499	1	0.491118	31.2791
GOTERM_CC_FAT	GO:0031252~cell leading edge	11	1.17899	0.0270187	ENSMUSG00000020857, ENSMUSG00000042429, ENSMUSG00000029528, ENSMUSG00000024397, ENSMUSG00000052698, ENSMUSG00000021262, ENSMUSG00000048232, ENSMUSG00000018001, ENSMUSG00000029684, ENSMUSG00000028868, ENSMUSG00000005089	556	112	12504	2.20876	0.999952	0.225038	31.384
GOTERM_BP_FAT	GO:0045137~development of primary sexual characteristics	11	1.17899	0.0214771	ENSMUSG00000038541, ENSMUSG00000026311, ENSMUSG00000022868, ENSMUSG00000018604, ENSMUSG00000039117, ENSMUSG00000016758, ENSMUSG00000021765, ENSMUSG00000024990, ENSMUSG00000057722, ENSMUSG00000024949, ENSMUSG00000033487	627	104	13588	2.29217	1	0.491592	31.6578
GOTERM_MF_FAT	GO:0003707~steroid hormone receptor activity	7	0.750268	0.0252672	ENSMUSG00000037992, ENSMUSG00000015846, ENSMUSG00000060601, ENSMUSG00000017950, ENSMUSG00000032238, ENSMUSG00000037583, ENSMUSG00000020889	619	49	13288	3.0667	1	0.663754	32.1372
KEGG_PATHWAY	mmu04510:Focal adhesion	17	1.82208	0.0316365	ENSMUSG00000004098, ENSMUSG00000024421, ENSMUSG00000017344, ENSMUSG00000020053, ENSMUSG00000025809, ENSMUSG00000033220, ENSMUSG00000006134, ENSMUSG00000026042, ENSMUSG00000031834, ENSMUSG00000029528, ENSMUSG00000030774, ENSMUSG00000052698, ENSMUSG00000039844, ENSMUSG00000034664, ENSMUSG00000033721, ENSMUSG00000029860, ENSMUSG00000032796	281	198	5738	1.75323	0.994164	0.435331	32.171
GOTERM_CC_FAT	GO:0015934~large ribosomal subunit	6	0.643087	0.0280324	ENSMUSG00000021607, ENSMUSG00000047215, ENSMUSG00000034880, ENSMUSG00000010406, ENSMUSG00000063888, ENSMUSG00000001445	556	39	12504	3.45988	0.999967	0.227426	32.3604
INTERPRO	IPR000536:Nuclear hormone receptor, ligand-binding, core	7	0.750268	0.0238879	ENSMUSG00000037992, ENSMUSG00000015846, ENSMUSG00000060601, ENSMUSG00000017950, ENSMUSG00000032238, ENSMUSG00000037583, ENSMUSG00000020889	816	49	17763	3.10977	1	0.885522	32.5008
INTERPRO	IPR008946:Nuclear hormone receptor, ligand-binding	7	0.750268	0.0238879	ENSMUSG00000037992, ENSMUSG00000015846, ENSMUSG00000060601, ENSMUSG00000017950, ENSMUSG00000032238, ENSMUSG00000037583, ENSMUSG00000020889	816	49	17763	3.10977	1	0.885522	32.5008
GOTERM_MF_FAT	GO:0003700~transcription factor activity	49	5.25188	0.0260259	ENSMUSG00000000134, ENSMUSG00000049086, ENSMUSG00000003949, ENSMUSG00000072294, ENSMUSG00000040721, ENSMUSG00000020889, ENSMUSG00000038418, ENSMUSG00000000282, ENSMUSG00000038415, ENSMUSG00000031393, ENSMUSG00000037992, ENSMUSG00000026436, ENSMUSG00000055148, ENSMUSG00000018604, ENSMUSG00000047907, ENSMUSG00000031681, ENSMUSG00000046711, ENSMUSG00000042406, ENSMUSG00000021217, ENSMUSG00000030087,…	619	776	13288	1.35551	1	0.653781	32.9331
GOTERM_BP_FAT	GO:0006412~translation	24	2.57235	0.0225886	ENSMUSG00000007892, ENSMUSG00000021607, ENSMUSG00000047215, ENSMUSG00000029614, ENSMUSG00000034880, ENSMUSG00000067194, ENSMUSG00000071415, ENSMUSG00000024991, ENSMUSG00000030744, ENSMUSG00000075528, ENSMUSG00000022884, ENSMUSG00000001445, ENSMUSG00000026245, ENSMUSG00000010406, ENSMUSG00000021282, ENSMUSG00000021967, ENSMUSG00000050621, ENSMUSG00000026087, ENSMUSG00000057863, ENSMUSG00000063888,…	627	319	13588	1.63045	1	0.504724	33.0062
GOTERM_BP_FAT	GO:0009719~response to endogenous stimulus	16	1.7149	0.0230573	ENSMUSG00000020091, ENSMUSG00000072849, ENSMUSG00000055980, ENSMUSG00000062515, ENSMUSG00000024990, ENSMUSG00000057722, ENSMUSG00000050541, ENSMUSG00000038541, ENSMUSG00000022868, ENSMUSG00000031834, ENSMUSG00000027875, ENSMUSG00000000948, ENSMUSG00000056201, ENSMUSG00000030671, ENSMUSG00000030168, ENSMUSG00000005089	627	184	13588	1.88447	1	0.507467	33.5672
GOTERM_MF_FAT	GO:0016289~CoA hydrolase activity	5	0.535906	0.02693	ENSMUSG00000060317, ENSMUSG00000070985, ENSMUSG00000017950, ENSMUSG00000046404, ENSMUSG00000021228	619	25	13288	4.29338	1	0.646633	33.87
INTERPRO	IPR016135:Ubiquitin-conjugating enzyme/RWD-like	7	0.750268	0.0261285	ENSMUSG00000028133, ENSMUSG00000005575, ENSMUSG00000019927, ENSMUSG00000078578, ENSMUSG00000036241, ENSMUSG00000015120, ENSMUSG00000034343	816	50	17763	3.04757	1	0.890863	34.9761
GOTERM_CC_FAT	GO:0005615~extracellular space	33	3.53698	0.031396	ENSMUSG00000017344, ENSMUSG00000033831, ENSMUSG00000020053, ENSMUSG00000029417, ENSMUSG00000024990, ENSMUSG00000046070, ENSMUSG00000024924, ENSMUSG00000033307, ENSMUSG00000023206, ENSMUSG00000061780, ENSMUSG00000022868, ENSMUSG00000042423, ENSMUSG00000057400, ENSMUSG00000008999, ENSMUSG00000032081, ENSMUSG00000033739, ENSMUSG00000032083, ENSMUSG00000042340, ENSMUSG00000059908, ENSMUSG00000074264,…	556	511	12504	1.45234	0.999991	0.246048	35.5091
GOTERM_BP_FAT	GO:0007242~intracellular signaling cascade	56	6.00214	0.0249843	ENSMUSG00000009828, ENSMUSG00000029518, ENSMUSG00000022508, ENSMUSG00000042594, ENSMUSG00000033307, ENSMUSG00000037003, ENSMUSG00000031681, ENSMUSG00000039844, ENSMUSG00000040964, ENSMUSG00000020121, ENSMUSG00000033739, ENSMUSG00000020120, ENSMUSG00000000276, ENSMUSG00000033863, ENSMUSG00000055980, ENSMUSG00000028062, ENSMUSG00000035711, ENSMUSG00000030228, ENSMUSG00000054855, ENSMUSG00000022206,…	627	915	13588	1.32634	1	0.531589	35.8274
GOTERM_BP_FAT	GO:0030384~phosphoinositide metabolic process	8	0.857449	0.0252537	ENSMUSG00000010607, ENSMUSG00000017721, ENSMUSG00000026925, ENSMUSG00000022973, ENSMUSG00000030228, ENSMUSG00000021340, ENSMUSG00000079469, ENSMUSG00000030990	627	63	13588	2.75193	1	0.53098	36.1376
GOTERM_CC_FAT	GO:0005768~endosome	19	2.03644	0.0322287	ENSMUSG00000026832, ENSMUSG00000028062, ENSMUSG00000004319, ENSMUSG00000034731, ENSMUSG00000018774, ENSMUSG00000028868, ENSMUSG00000040188, ENSMUSG00000019818, ENSMUSG00000025422, ENSMUSG00000025351, ENSMUSG00000040605, ENSMUSG00000020100, ENSMUSG00000044147, ENSMUSG00000014550, ENSMUSG00000048832, ENSMUSG00000026426, ENSMUSG00000028419, ENSMUSG00000066278, ENSMUSG00000010936	556	252	12504	1.69561	0.999993	0.246582	36.2674
GOTERM_BP_FAT	GO:0001558~regulation of cell growth	10	1.07181	0.0256598	ENSMUSG00000022868, ENSMUSG00000027394, ENSMUSG00000002083, ENSMUSG00000023046, ENSMUSG00000004798, ENSMUSG00000030168, ENSMUSG00000056493, ENSMUSG00000028755, ENSMUSG00000062762, ENSMUSG00000042379	627	92	13588	2.35559	1	0.532308	36.6024
GOTERM_BP_FAT	GO:0044093~positive regulation of molecular function	23	2.46517	0.0258959	ENSMUSG00000000276, ENSMUSG00000055980, ENSMUSG00000028062, ENSMUSG00000034731, ENSMUSG00000072115, ENSMUSG00000034485, ENSMUSG00000022206, ENSMUSG00000024924, ENSMUSG00000025422, ENSMUSG00000057342, ENSMUSG00000042429, ENSMUSG00000061436, ENSMUSG00000029528, ENSMUSG00000040479, ENSMUSG00000036438, ENSMUSG00000002083, ENSMUSG00000033792, ENSMUSG00000033721, ENSMUSG00000057789, ENSMUSG00000036835,…	627	306	13588	1.6289	1	0.531245	36.8712
GOTERM_MF_FAT	GO:0004143~diacylglycerol kinase activity	4	0.428725	0.029985	ENSMUSG00000000276, ENSMUSG00000040479, ENSMUSG00000034731, ENSMUSG00000057342	619	15	13288	5.7245	1	0.667815	36.9462
GOTERM_MF_FAT	GO:0016290~palmitoyl-CoA hydrolase activity	4	0.428725	0.029985	ENSMUSG00000060317, ENSMUSG00000070985, ENSMUSG00000017950, ENSMUSG00000021228	619	15	13288	5.7245	1	0.667815	36.9462
GOTERM_BP_FAT	GO:0051651~maintenance of location in cell	5	0.535906	0.0261221	ENSMUSG00000052698, ENSMUSG00000029368, ENSMUSG00000003378, ENSMUSG00000002778, ENSMUSG00000032199	627	25	13588	4.33429	1	0.530071	37.1277
GOTERM_MF_FAT	GO:0005198~structural molecule activity	31	3.32262	0.0304373	ENSMUSG00000007892, ENSMUSG00000021607, ENSMUSG00000004098, ENSMUSG00000047215, ENSMUSG00000029614, ENSMUSG00000034880, ENSMUSG00000071415, ENSMUSG00000001445, ENSMUSG00000030137, ENSMUSG00000029528, ENSMUSG00000028464, ENSMUSG00000021967, ENSMUSG00000032060, ENSMUSG00000063888, ENSMUSG00000020315, ENSMUSG00000032796, ENSMUSG00000049517, ENSMUSG00000001435, ENSMUSG00000028339, ENSMUSG00000041378,…	619	450	13288	1.47883	1	0.655501	37.3901
GOTERM_CC_FAT	GO:0005774~vacuolar membrane	5	0.535906	0.0337514	ENSMUSG00000020100, ENSMUSG00000026426, ENSMUSG00000024121, ENSMUSG00000028581, ENSMUSG00000010936	556	28	12504	4.01593	0.999996	0.25162	37.6325
GOTERM_MF_FAT	GO:0003723~RNA binding	43	4.60879	0.0308803	ENSMUSG00000034120, ENSMUSG00000021127, ENSMUSG00000056851, ENSMUSG00000047215, ENSMUSG00000026511, ENSMUSG00000060373, ENSMUSG00000078765, ENSMUSG00000067194, ENSMUSG00000028809, ENSMUSG00000020076, ENSMUSG00000052776, ENSMUSG00000031586, ENSMUSG00000024949, ENSMUSG00000022884, ENSMUSG00000063480, ENSMUSG00000031393, ENSMUSG00000028706, ENSMUSG00000026245, ENSMUSG00000051557, ENSMUSG00000041827,…	619	672	13288	1.37362	1	0.643801	37.8221
INTERPRO	IPR001589:Actinin-type, actin-binding, conserved site	5	0.535906	0.0294255	ENSMUSG00000028649, ENSMUSG00000035459, ENSMUSG00000020315, ENSMUSG00000026131, ENSMUSG00000063450	816	26	17763	4.18623	1	0.903932	38.4638
GOTERM_CC_FAT	GO:0031012~extracellular matrix	22	2.35798	0.0351499	ENSMUSG00000001435, ENSMUSG00000021390, ENSMUSG00000028339, ENSMUSG00000022894, ENSMUSG00000004098, ENSMUSG00000024421, ENSMUSG00000017344, ENSMUSG00000021340, ENSMUSG00000072115, ENSMUSG00000041782, ENSMUSG00000041577, ENSMUSG00000035270, ENSMUSG00000015085, ENSMUSG00000026042, ENSMUSG00000022868, ENSMUSG00000048368, ENSMUSG00000029675, ENSMUSG00000029368, ENSMUSG00000036585, ENSMUSG00000031954,…	556	309	12504	1.60117	0.999998	0.255622	38.8624
KEGG_PATHWAY	mmu01040:Biosynthesis of unsaturated fatty acids	5	0.535906	0.0401723	ENSMUSG00000046404, ENSMUSG00000025203, ENSMUSG00000037071, ENSMUSG00000021228, ENSMUSG00000032349	281	27	5738	3.78147	0.998584	0.481089	39.0482
GOTERM_BP_FAT	GO:0043066~negative regulation of apoptosis	19	2.03644	0.0278902	ENSMUSG00000020857, ENSMUSG00000042292, ENSMUSG00000020053, ENSMUSG00000022508, ENSMUSG00000030847, ENSMUSG00000020423, ENSMUSG00000057342, ENSMUSG00000042429, ENSMUSG00000061436, ENSMUSG00000031393, ENSMUSG00000018604, ENSMUSG00000018537, ENSMUSG00000029535, ENSMUSG00000025001, ENSMUSG00000029368, ENSMUSG00000039910, ENSMUSG00000030990, ENSMUSG00000031954, ENSMUSG00000022174	627	239	13588	1.72284	1	0.549505	39.0992
GOTERM_BP_FAT	GO:0045116~protein neddylation	3	0.321543	0.0280909	ENSMUSG00000005575, ENSMUSG00000010376, ENSMUSG00000034343	627	6	13588	10.8357	1	0.547868	39.3193
GOTERM_BP_FAT	GO:0030155~regulation of cell adhesion	10	1.07181	0.0290049	ENSMUSG00000026832, ENSMUSG00000024421, ENSMUSG00000017344, ENSMUSG00000018001, ENSMUSG00000033721, ENSMUSG00000020659, ENSMUSG00000039910, ENSMUSG00000022508, ENSMUSG00000032796, ENSMUSG00000015605	627	94	13588	2.30547	1	0.555346	40.3121
GOTERM_CC_FAT	GO:0016591~DNA-directed RNA polymerase II, holoenzyme	7	0.750268	0.0369842	ENSMUSG00000039117, ENSMUSG00000024218, ENSMUSG00000038489, ENSMUSG00000031314, ENSMUSG00000018068, ENSMUSG00000052293, ENSMUSG00000047371	556	56	12504	2.81115	0.999999	0.262136	40.4414
GOTERM_BP_FAT	GO:0030048~actin filament-based movement	4	0.428725	0.0292621	ENSMUSG00000021262, ENSMUSG00000030739, ENSMUSG00000028868, ENSMUSG00000075284	627	15	13588	5.77905	1	0.554409	40.5886
GOTERM_CC_FAT	GO:0019866~organelle inner membrane	22	2.35798	0.0383998	ENSMUSG00000018677, ENSMUSG00000022299, ENSMUSG00000024248, ENSMUSG00000025270, ENSMUSG00000054630, ENSMUSG00000064351, ENSMUSG00000045316, ENSMUSG00000064370, ENSMUSG00000025733, ENSMUSG00000064345, ENSMUSG00000064354, ENSMUSG00000064356, ENSMUSG00000064341, ENSMUSG00000024527, ENSMUSG00000064357, ENSMUSG00000021520, ENSMUSG00000064358, ENSMUSG00000027875, ENSMUSG00000064367, ENSMUSG00000013701,…	556	312	12504	1.58578	0.999999	0.265816	41.6341
GOTERM_MF_FAT	GO:0016410~N-acyltransferase activity	8	0.857449	0.0354855	ENSMUSG00000029670, ENSMUSG00000060317, ENSMUSG00000070985, ENSMUSG00000005982, ENSMUSG00000079334, ENSMUSG00000022698, ENSMUSG00000025270, ENSMUSG00000068299	619	67	13288	2.56321	1	0.679324	42.1506
GOTERM_BP_FAT	GO:0043069~negative regulation of programmed cell death	19	2.03644	0.0332917	ENSMUSG00000020857, ENSMUSG00000042292, ENSMUSG00000020053, ENSMUSG00000022508, ENSMUSG00000030847, ENSMUSG00000020423, ENSMUSG00000057342, ENSMUSG00000042429, ENSMUSG00000061436, ENSMUSG00000031393, ENSMUSG00000018604, ENSMUSG00000018537, ENSMUSG00000029535, ENSMUSG00000025001, ENSMUSG00000029368, ENSMUSG00000039910, ENSMUSG00000030990, ENSMUSG00000031954, ENSMUSG00000022174	627	244	13588	1.68753	1	0.597919	44.7672
GOTERM_CC_FAT	GO:0005578~proteinaceous extracellular matrix	21	2.2508	0.0424472	ENSMUSG00000001435, ENSMUSG00000021390, ENSMUSG00000028339, ENSMUSG00000022894, ENSMUSG00000004098, ENSMUSG00000024421, ENSMUSG00000017344, ENSMUSG00000021340, ENSMUSG00000072115, ENSMUSG00000041782, ENSMUSG00000041577, ENSMUSG00000035270, ENSMUSG00000015085, ENSMUSG00000026042, ENSMUSG00000048368, ENSMUSG00000029675, ENSMUSG00000029368, ENSMUSG00000036585, ENSMUSG00000031954, ENSMUSG00000028600,…	556	297	12504	1.59015	1	0.28466	44.923
GOTERM_CC_FAT	GO:0044448~cell cortex part	8	0.857449	0.0427013	ENSMUSG00000059248, ENSMUSG00000038976, ENSMUSG00000032827, ENSMUSG00000029761, ENSMUSG00000032300, ENSMUSG00000020315, ENSMUSG00000056201, ENSMUSG00000050379	556	73	12504	2.46457	1	0.281095	45.1237
INTERPRO	IPR004018:RPEL repeat	3	0.321543	0.0378644	ENSMUSG00000009569, ENSMUSG00000062866, ENSMUSG00000042292	816	7	17763	9.32931	1	0.942131	46.6081
GOTERM_BP_FAT	GO:0035295~tube development	20	2.14362	0.0368849	ENSMUSG00000058454, ENSMUSG00000038593, ENSMUSG00000020053, ENSMUSG00000028266, ENSMUSG00000024990, ENSMUSG00000030123, ENSMUSG00000015605, ENSMUSG00000031665, ENSMUSG00000037992, ENSMUSG00000016028, ENSMUSG00000029528, ENSMUSG00000018604, ENSMUSG00000024713, ENSMUSG00000033792, ENSMUSG00000036585, ENSMUSG00000026814, ENSMUSG00000008999, ENSMUSG00000056201, ENSMUSG00000032796, ENSMUSG00000005087	627	264	13588	1.64178	1	0.6321	48.2581
GOTERM_CC_FAT	GO:0005829~cytosol	34	3.64416	0.0471673	ENSMUSG00000009828, ENSMUSG00000033819, ENSMUSG00000021127, ENSMUSG00000047215, ENSMUSG00000001229, ENSMUSG00000028367, ENSMUSG00000018697, ENSMUSG00000025175, ENSMUSG00000069919, ENSMUSG00000031393, ENSMUSG00000033022, ENSMUSG00000025429, ENSMUSG00000057789, ENSMUSG00000028419, ENSMUSG00000008855, ENSMUSG00000024985, ENSMUSG00000069917, ENSMUSG00000039431, ENSMUSG00000055980, ENSMUSG00000025271,…	556	549	12504	1.39277	1	0.30088	48.5412
GOTERM_MF_FAT	GO:0015293~symporter activity	12	1.28617	0.0436931	ENSMUSG00000020261, ENSMUSG00000005107, ENSMUSG00000028976, ENSMUSG00000021335, ENSMUSG00000037762, ENSMUSG00000020805, ENSMUSG00000071335, ENSMUSG00000017756, ENSMUSG00000022899, ENSMUSG00000020334, ENSMUSG00000030096, ENSMUSG00000005089	619	132	13288	1.95153	1	0.740172	49.1753
GOTERM_MF_FAT	GO:0016229~steroid dehydrogenase activity	5	0.535906	0.0437428	ENSMUSG00000021210, ENSMUSG00000038541, ENSMUSG00000038641, ENSMUSG00000021594, ENSMUSG00000063730	619	29	13288	3.70119	1	0.726193	49.2152
GOTERM_BP_FAT	GO:0006699~bile acid biosynthetic process	3	0.321543	0.0381419	ENSMUSG00000038641, ENSMUSG00000029556, ENSMUSG00000023963	627	7	13588	9.28776	1	0.640556	49.4294
GOTERM_BP_FAT	GO:0051493~regulation of cytoskeleton organization	10	1.07181	0.0386775	ENSMUSG00000026755, ENSMUSG00000021262, ENSMUSG00000029675, ENSMUSG00000044042, ENSMUSG00000043079, ENSMUSG00000029621, ENSMUSG00000020315, ENSMUSG00000056201, ENSMUSG00000026131, ENSMUSG00000020120	627	99	13588	2.18904	1	0.641722	49.9208
GOTERM_MF_FAT	GO:0004879~ligand-dependent nuclear receptor activity	7	0.750268	0.0448135	ENSMUSG00000037992, ENSMUSG00000015846, ENSMUSG00000060601, ENSMUSG00000017950, ENSMUSG00000032238, ENSMUSG00000037583, ENSMUSG00000020889	619	56	13288	2.68336	1	0.721046	50.0699
INTERPRO	IPR019954:Ubiquitin conserved site	5	0.535906	0.0419937	ENSMUSG00000025171, ENSMUSG00000003813, ENSMUSG00000008604, ENSMUSG00000055553, ENSMUSG00000010376	816	29	17763	3.75317	1	0.94977	50.2138
INTERPRO	IPR000608:Ubiquitin-conjugating enzyme, E2	6	0.643087	0.0420527	ENSMUSG00000005575, ENSMUSG00000019927, ENSMUSG00000078578, ENSMUSG00000036241, ENSMUSG00000015120, ENSMUSG00000034343	816	42	17763	3.10977	1	0.941445	50.2636
GOTERM_CC_FAT	GO:0005669~transcription factor TFIID complex	4	0.428725	0.0496476	ENSMUSG00000039117, ENSMUSG00000024218, ENSMUSG00000031314, ENSMUSG00000052293	556	19	12504	4.73457	1	0.309056	50.3529
GOTERM_BP_FAT	GO:0008284~positive regulation of cell proliferation	21	2.2508	0.0392634	ENSMUSG00000020857, ENSMUSG00000001435, ENSMUSG00000055980, ENSMUSG00000007817, ENSMUSG00000020053, ENSMUSG00000025809, ENSMUSG00000022508, ENSMUSG00000072115, ENSMUSG00000062515, ENSMUSG00000033220, ENSMUSG00000057342, ENSMUSG00000037992, ENSMUSG00000061436, ENSMUSG00000031393, ENSMUSG00000001910, ENSMUSG00000018604, ENSMUSG00000067847, ENSMUSG00000036585, ENSMUSG00000054263, ENSMUSG00000034254,…	627	284	13588	1.60247	1	0.643343	50.4531
GOTERM_BP_FAT	GO:0051338~regulation of transferase activity	16	1.7149	0.0419719	ENSMUSG00000000276, ENSMUSG00000055980, ENSMUSG00000028062, ENSMUSG00000034731, ENSMUSG00000062515, ENSMUSG00000024924, ENSMUSG00000025422, ENSMUSG00000057342, ENSMUSG00000042429, ENSMUSG00000029528, ENSMUSG00000040479, ENSMUSG00000033721, ENSMUSG00000004221, ENSMUSG00000032083, ENSMUSG00000032578, ENSMUSG00000030983	627	199	13588	1.74243	1	0.664381	52.8458
GOTERM_MF_FAT	GO:0005201~extracellular matrix structural constituent	5	0.535906	0.0486857	ENSMUSG00000001435, ENSMUSG00000026042, ENSMUSG00000004098, ENSMUSG00000029675, ENSMUSG00000032796	619	30	13288	3.57781	1	0.737721	53.0497
GOTERM_MF_FAT	GO:0016251~general RNA polymerase II transcription factor activity	5	0.535906	0.0486857	ENSMUSG00000061650, ENSMUSG00000045248, ENSMUSG00000039117, ENSMUSG00000022109, ENSMUSG00000015776	619	30	13288	3.57781	1	0.737721	53.0497
GOTERM_CC_FAT	GO:0005938~cell cortex	11	1.17899	0.0535813	ENSMUSG00000028649, ENSMUSG00000026832, ENSMUSG00000059248, ENSMUSG00000038976, ENSMUSG00000033831, ENSMUSG00000032827, ENSMUSG00000029761, ENSMUSG00000032300, ENSMUSG00000020315, ENSMUSG00000056201, ENSMUSG00000050379	556	126	12504	1.96334	1	0.324276	53.1054
GOTERM_BP_FAT	GO:0006119~oxidative phosphorylation	7	0.750268	0.0431307	ENSMUSG00000064356, ENSMUSG00000021520, ENSMUSG00000064357, ENSMUSG00000031393, ENSMUSG00000064358, ENSMUSG00000064367, ENSMUSG00000024121, ENSMUSG00000064345, ENSMUSG00000064363	627	56	13588	2.70893	1	0.670657	53.8359
GOTERM_CC_FAT	GO:0001726~ruffle	6	0.643087	0.0561461	ENSMUSG00000020857, ENSMUSG00000024397, ENSMUSG00000052698, ENSMUSG00000048232, ENSMUSG00000018001, ENSMUSG00000028868	556	47	12504	2.87096	1	0.331939	54.823
GOTERM_MF_FAT	GO:0016712~oxidoreductase activity, acting on paired donors, with incorporation or reduction of molecular oxygen, reduced flavin or flavoprotein as one donor, and incorporation of one atom of oxygen	6	0.643087	0.0522379	ENSMUSG00000015224, ENSMUSG00000074254, ENSMUSG00000028713, ENSMUSG00000056035, ENSMUSG00000025197, ENSMUSG00000027983	619	44	13288	2.9273	1	0.750247	55.6365
INTERPRO	IPR019956:Ubiquitin subgroup	3	0.321543	0.0489756	ENSMUSG00000025171, ENSMUSG00000055553, ENSMUSG00000010376	816	8	17763	8.16314	1	0.957192	55.7956
GOTERM_MF_FAT	GO:0019207~kinase regulator activity	8	0.857449	0.0525976	ENSMUSG00000022868, ENSMUSG00000031834, ENSMUSG00000038990, ENSMUSG00000063015, ENSMUSG00000046447, ENSMUSG00000025422, ENSMUSG00000030983, ENSMUSG00000010936	619	73	13288	2.35254	1	0.74048	55.8908
GOTERM_CC_FAT	GO:0005667~transcription factor complex	17	1.82208	0.0578924	ENSMUSG00000000134, ENSMUSG00000024218, ENSMUSG00000027490, ENSMUSG00000017950, ENSMUSG00000028266, ENSMUSG00000058886, ENSMUSG00000020248, ENSMUSG00000032897, ENSMUSG00000029556, ENSMUSG00000006456, ENSMUSG00000039117, ENSMUSG00000031681, ENSMUSG00000026077, ENSMUSG00000031314, ENSMUSG00000052293, ENSMUSG00000042406, ENSMUSG00000024985	556	234	12504	1.63383	1	0.33532	55.9589
KEGG_PATHWAY	mmu00140:Steroid hormone biosynthesis	6	0.643087	0.0664026	ENSMUSG00000038541, ENSMUSG00000056035, ENSMUSG00000038641, ENSMUSG00000054630, ENSMUSG00000021594, ENSMUSG00000063730	281	45	5738	2.72266	0.999983	0.631907	56.3805
GOTERM_BP_FAT	GO:0042770~DNA damage response, signal transduction	7	0.750268	0.0464099	ENSMUSG00000061436, ENSMUSG00000029535, ENSMUSG00000002083, ENSMUSG00000030990, ENSMUSG00000034485, ENSMUSG00000033307, ENSMUSG00000030322	627	57	13588	2.66141	1	0.694111	56.5324
GOTERM_BP_FAT	GO:0050727~regulation of inflammatory response	7	0.750268	0.0464099	ENSMUSG00000022868, ENSMUSG00000042429, ENSMUSG00000022508, ENSMUSG00000062515, ENSMUSG00000034485, ENSMUSG00000044786, ENSMUSG00000068686	627	57	13588	2.66141	1	0.694111	56.5324
GOTERM_BP_FAT	GO:0001570~vasculogenesis	6	0.643087	0.0464721	ENSMUSG00000021127, ENSMUSG00000007817, ENSMUSG00000026814, ENSMUSG00000039910, ENSMUSG00000046470, ENSMUSG00000026921	627	43	13588	3.02392	1	0.690811	56.5821
GOTERM_BP_FAT	GO:0016126~sterol biosynthetic process	5	0.535906	0.0473028	ENSMUSG00000021252, ENSMUSG00000027875, ENSMUSG00000058454, ENSMUSG00000045294, ENSMUSG00000032083	627	30	13588	3.61191	1	0.693635	57.2404
GOTERM_BP_FAT	GO:0042439~ethanolamine and derivative metabolic process	4	0.428725	0.0474078	ENSMUSG00000031393, ENSMUSG00000036833, ENSMUSG00000070644, ENSMUSG00000000301	627	18	13588	4.81588	1	0.690739	57.323
GOTERM_BP_FAT	GO:0006869~lipid transport	11	1.17899	0.0478862	ENSMUSG00000032548, ENSMUSG00000020435, ENSMUSG00000029556, ENSMUSG00000029279, ENSMUSG00000011884, ENSMUSG00000024990, ENSMUSG00000060131, ENSMUSG00000024924, ENSMUSG00000032081, ENSMUSG00000037606, ENSMUSG00000032083	627	119	13588	2.00324	1	0.690789	57.6972
GOTERM_BP_FAT	GO:0007167~enzyme linked receptor protein signaling pathway	20	2.14362	0.0482745	ENSMUSG00000020091, ENSMUSG00000055980, ENSMUSG00000017376, ENSMUSG00000031465, ENSMUSG00000020053, ENSMUSG00000022102, ENSMUSG00000002489, ENSMUSG00000061436, ENSMUSG00000031834, ENSMUSG00000030774, ENSMUSG00000028289, ENSMUSG00000024621, ENSMUSG00000039844, ENSMUSG00000031681, ENSMUSG00000003378, ENSMUSG00000036585, ENSMUSG00000026814, ENSMUSG00000021765, ENSMUSG00000008999, ENSMUSG00000020315	627	273	13588	1.58765	1	0.690146	57.9987
GOTERM_BP_FAT	GO:0048729~tissue morphogenesis	18	1.92926	0.0487219	ENSMUSG00000038593, ENSMUSG00000020053, ENSMUSG00000028266, ENSMUSG00000030123, ENSMUSG00000022587, ENSMUSG00000038415, ENSMUSG00000028649, ENSMUSG00000016028, ENSMUSG00000018604, ENSMUSG00000015846, ENSMUSG00000029556, ENSMUSG00000031681, ENSMUSG00000033792, ENSMUSG00000021765, ENSMUSG00000008999, ENSMUSG00000056201, ENSMUSG00000032796, ENSMUSG00000005087	627	238	13588	1.63902	1	0.689967	58.3435
GOTERM_BP_FAT	GO:0045017~glycerolipid biosynthetic process	7	0.750268	0.0498397	ENSMUSG00000010607, ENSMUSG00000017721, ENSMUSG00000070644, ENSMUSG00000072115, ENSMUSG00000079469, ENSMUSG00000030990, ENSMUSG00000000301	627	58	13588	2.61552	1	0.694832	59.1934
INTERPRO	IPR003604:Zinc finger, U1-type	4	0.428725	0.0539167	ENSMUSG00000040721, ENSMUSG00000000552, ENSMUSG00000020211, ENSMUSG00000027016	816	19	17763	4.58282	1	0.963567	59.3848
INTERPRO	IPR000324:Vitamin D receptor	4	0.428725	0.0539167	ENSMUSG00000015846, ENSMUSG00000060601, ENSMUSG00000017950, ENSMUSG00000020889	816	19	17763	4.58282	1	0.963567	59.3848
INTERPRO	IPR003124:Actin-binding WH2	4	0.428725	0.0539167	ENSMUSG00000038013, ENSMUSG00000029684, ENSMUSG00000028868, ENSMUSG00000075284	816	19	17763	4.58282	1	0.963567	59.3848
INTERPRO	IPR001791:Laminin G	6	0.643087	0.054075	ENSMUSG00000001435, ENSMUSG00000016028, ENSMUSG00000028339, ENSMUSG00000004098, ENSMUSG00000024421, ENSMUSG00000032796	816	45	17763	2.90245	1	0.95805	59.4952
KEGG_PATHWAY	mmu00150:Androgen and estrogen metabolism	5	0.535906	0.0747888	ENSMUSG00000038541, ENSMUSG00000038641, ENSMUSG00000054630, ENSMUSG00000021594, ENSMUSG00000063730	281	33	5738	3.09393	0.999996	0.645286	60.8833
GOTERM_BP_FAT	GO:0033043~regulation of organelle organization	13	1.39335	0.0523736	ENSMUSG00000026755, ENSMUSG00000031393, ENSMUSG00000021262, ENSMUSG00000029675, ENSMUSG00000044042, ENSMUSG00000029621, ENSMUSG00000043079, ENSMUSG00000003378, ENSMUSG00000026749, ENSMUSG00000056201, ENSMUSG00000020315, ENSMUSG00000026131, ENSMUSG00000020120	627	154	13588	1.82941	1	0.709677	61.0598
GOTERM_BP_FAT	GO:0007265~Ras protein signal transduction	7	0.750268	0.053421	ENSMUSG00000035711, ENSMUSG00000020121, ENSMUSG00000022508, ENSMUSG00000028868, ENSMUSG00000000149, ENSMUSG00000022102, ENSMUSG00000073982	627	59	13588	2.57119	1	0.71351	61.8076
GOTERM_BP_FAT	GO:0006366~transcription from RNA polymerase II promoter	8	0.857449	0.0536267	ENSMUSG00000039117, ENSMUSG00000024218, ENSMUSG00000052040, ENSMUSG00000038489, ENSMUSG00000070002, ENSMUSG00000028266, ENSMUSG00000058886, ENSMUSG00000047371	627	74	13588	2.34286	1	0.711496	61.9528
GOTERM_BP_FAT	GO:0003007~heart morphogenesis	8	0.857449	0.0536267	ENSMUSG00000009569, ENSMUSG00000007817, ENSMUSG00000018604, ENSMUSG00000015846, ENSMUSG00000026814, ENSMUSG00000024990, ENSMUSG00000022587, ENSMUSG00000015605	627	74	13588	2.34286	1	0.711496	61.9528
GOTERM_CC_FAT	GO:0044437~vacuolar part	5	0.535906	0.067888	ENSMUSG00000020100, ENSMUSG00000026426, ENSMUSG00000024121, ENSMUSG00000028581, ENSMUSG00000010936	556	35	12504	3.21274	1	0.376613	61.9672
GOTERM_CC_FAT	GO:0010008~endosome membrane	5	0.535906	0.067888	ENSMUSG00000025351, ENSMUSG00000020100, ENSMUSG00000026426, ENSMUSG00000040188, ENSMUSG00000010936	556	35	12504	3.21274	1	0.376613	61.9672
GOTERM_CC_FAT	GO:0044440~endosomal part	5	0.535906	0.067888	ENSMUSG00000025351, ENSMUSG00000020100, ENSMUSG00000026426, ENSMUSG00000040188, ENSMUSG00000010936	556	35	12504	3.21274	1	0.376613	61.9672
KEGG_PATHWAY	mmu00561:Glycerolipid metabolism	6	0.643087	0.0771677	ENSMUSG00000000276, ENSMUSG00000040479, ENSMUSG00000053846, ENSMUSG00000034731, ENSMUSG00000034254, ENSMUSG00000026922	281	47	5738	2.6068	0.999997	0.627829	62.0806
GOTERM_BP_FAT	GO:0030330~DNA damage response, signal transduction by p53 class mediator	4	0.428725	0.0544316	ENSMUSG00000061436, ENSMUSG00000029535, ENSMUSG00000002083, ENSMUSG00000033307	627	19	13588	4.56241	1	0.713589	62.5161
GOTERM_BP_FAT	GO:0030833~regulation of actin filament polymerization	6	0.643087	0.0547842	ENSMUSG00000026755, ENSMUSG00000021262, ENSMUSG00000029675, ENSMUSG00000044042, ENSMUSG00000029621, ENSMUSG00000020315	627	45	13588	2.88953	1	0.712605	62.7605
GOTERM_MF_FAT	GO:0005507~copper ion binding	7	0.750268	0.0633151	ENSMUSG00000027597, ENSMUSG00000025193, ENSMUSG00000029368, ENSMUSG00000033792, ENSMUSG00000064351, ENSMUSG00000072115, ENSMUSG00000064354	619	61	13288	2.46341	1	0.79372	62.8739
GOTERM_MF_FAT	GO:0016291~acyl-CoA thioesterase activity	4	0.428725	0.0633519	ENSMUSG00000060317, ENSMUSG00000070985, ENSMUSG00000017950, ENSMUSG00000021228	619	20	13288	4.29338	1	0.783143	62.896
GOTERM_CC_FAT	GO:0005773~vacuole	15	1.60772	0.0703939	ENSMUSG00000028062, ENSMUSG00000036833, ENSMUSG00000018774, ENSMUSG00000019818, ENSMUSG00000020261, ENSMUSG00000025351, ENSMUSG00000025521, ENSMUSG00000020100, ENSMUSG00000027602, ENSMUSG00000026426, ENSMUSG00000021477, ENSMUSG00000024121, ENSMUSG00000031838, ENSMUSG00000028581, ENSMUSG00000010936	556	204	12504	1.65362	1	0.382306	63.3494
INTERPRO	IPR014940:BAAT/Acyl-CoA thioester hydrolase C-terminal	3	0.321543	0.0610926	ENSMUSG00000060317, ENSMUSG00000070985, ENSMUSG00000021228	816	9	17763	7.25613	1	0.967926	64.1134
INTERPRO	IPR000756:Diacylglycerol kinase accessory region	3	0.321543	0.0610926	ENSMUSG00000000276, ENSMUSG00000040479, ENSMUSG00000034731	816	9	17763	7.25613	1	0.967926	64.1134
INTERPRO	IPR016662:Acyl-CoA thioesterase, long chain	3	0.321543	0.0610926	ENSMUSG00000060317, ENSMUSG00000070985, ENSMUSG00000021228	816	9	17763	7.25613	1	0.967926	64.1134
INTERPRO	IPR006862:Acyl-CoA thioester hydrolase/bile acid-CoA amino acid N-acetyltransferase	3	0.321543	0.0610926	ENSMUSG00000060317, ENSMUSG00000070985, ENSMUSG00000021228	816	9	17763	7.25613	1	0.967926	64.1134
GOTERM_MF_FAT	GO:0019787~small conjugating protein ligase activity	11	1.17899	0.0660409	ENSMUSG00000036840, ENSMUSG00000005575, ENSMUSG00000018537, ENSMUSG00000019927, ENSMUSG00000078578, ENSMUSG00000020659, ENSMUSG00000036309, ENSMUSG00000036241, ENSMUSG00000015120, ENSMUSG00000034343, ENSMUSG00000024019	619	125	13288	1.88909	1	0.786859	64.4773
GOTERM_BP_FAT	GO:0006505~GPI anchor metabolic process	5	0.535906	0.0578025	ENSMUSG00000010607, ENSMUSG00000017721, ENSMUSG00000021340, ENSMUSG00000079469, ENSMUSG00000030990	627	32	13588	3.38616	1	0.728957	64.7912
GOTERM_CC_FAT	GO:0005856~cytoskeleton	61	6.53805	0.0735054	ENSMUSG00000059248, ENSMUSG00000049086, ENSMUSG00000030739, ENSMUSG00000021661, ENSMUSG00000032254, ENSMUSG00000032606, ENSMUSG00000028649, ENSMUSG00000025555, ENSMUSG00000021262, ENSMUSG00000036438, ENSMUSG00000041775, ENSMUSG00000029684, ENSMUSG00000025920, ENSMUSG00000040964, ENSMUSG00000032300, ENSMUSG00000046447, ENSMUSG00000020483, ENSMUSG00000027394, ENSMUSG00000024397, ENSMUSG00000054855,…	556	1122	12504	1.22268	1	0.390364	65.0007
INTERPRO	IPR001628:Zinc finger, nuclear hormone receptor-type	6	0.643087	0.0630856	ENSMUSG00000037992, ENSMUSG00000015846, ENSMUSG00000060601, ENSMUSG00000017950, ENSMUSG00000032238, ENSMUSG00000020889	816	47	17763	2.77894	1	0.966876	65.3318
GOTERM_MF_FAT	GO:0016564~transcription repressor activity	16	1.7149	0.0677326	ENSMUSG00000004263, ENSMUSG00000072872, ENSMUSG00000049295, ENSMUSG00000054452, ENSMUSG00000022508, ENSMUSG00000062515, ENSMUSG00000056493, ENSMUSG00000021366, ENSMUSG00000037992, ENSMUSG00000061436, ENSMUSG00000031393, ENSMUSG00000001910, ENSMUSG00000018604, ENSMUSG00000046876, ENSMUSG00000008855, ENSMUSG00000023991	619	211	13288	1.62782	1	0.785347	65.4396
GOTERM_BP_FAT	GO:0046474~glycerophospholipid biosynthetic process	6	0.643087	0.0592418	ENSMUSG00000010607, ENSMUSG00000017721, ENSMUSG00000070644, ENSMUSG00000079469, ENSMUSG00000030990, ENSMUSG00000000301	627	46	13588	2.82671	1	0.734652	65.7224
GOTERM_CC_FAT	GO:0043025~cell soma	10	1.07181	0.0758393	ENSMUSG00000019874, ENSMUSG00000042429, ENSMUSG00000035392, ENSMUSG00000033792, ENSMUSG00000043079, ENSMUSG00000072115, ENSMUSG00000022791, ENSMUSG00000020810, ENSMUSG00000046447, ENSMUSG00000032199	556	117	12504	1.92215	1	0.394846	66.1938
GOTERM_BP_FAT	GO:0045860~positive regulation of protein kinase activity	11	1.17899	0.0601446	ENSMUSG00000000276, ENSMUSG00000042429, ENSMUSG00000029528, ENSMUSG00000040479, ENSMUSG00000028062, ENSMUSG00000034731, ENSMUSG00000024924, ENSMUSG00000004221, ENSMUSG00000025422, ENSMUSG00000032578, ENSMUSG00000057342	627	124	13588	1.92247	1	0.736926	66.2945
GOTERM_BP_FAT	GO:0043549~regulation of kinase activity	15	1.60772	0.0604141	ENSMUSG00000000276, ENSMUSG00000055980, ENSMUSG00000028062, ENSMUSG00000034731, ENSMUSG00000062515, ENSMUSG00000024924, ENSMUSG00000025422, ENSMUSG00000057342, ENSMUSG00000042429, ENSMUSG00000029528, ENSMUSG00000040479, ENSMUSG00000033721, ENSMUSG00000004221, ENSMUSG00000032578, ENSMUSG00000030983	627	192	13588	1.69308	1	0.735367	66.4636
GOTERM_BP_FAT	GO:0006706~steroid catabolic process	3	0.321543	0.0615276	ENSMUSG00000038541, ENSMUSG00000038641, ENSMUSG00000023963	627	9	13588	7.22382	1	0.738837	67.1536
GOTERM_BP_FAT	GO:0060079~regulation of excitatory postsynaptic membrane potential	4	0.428725	0.0619213	ENSMUSG00000031393, ENSMUSG00000042429, ENSMUSG00000003378, ENSMUSG00000046876	627	20	13588	4.33429	1	0.738029	67.3943
GOTERM_BP_FAT	GO:0006637~acyl-CoA metabolic process	4	0.428725	0.0619213	ENSMUSG00000060317, ENSMUSG00000070985, ENSMUSG00000017950, ENSMUSG00000021228	627	20	13588	4.33429	1	0.738029	67.3943
GOTERM_BP_FAT	GO:0048660~regulation of smooth muscle cell proliferation	4	0.428725	0.0619213	ENSMUSG00000072115, ENSMUSG00000034254, ENSMUSG00000033739, ENSMUSG00000024949	627	20	13588	4.33429	1	0.738029	67.3943
GOTERM_CC_FAT	GO:0000315~organellar large ribosomal subunit	4	0.428725	0.0797538	ENSMUSG00000021607, ENSMUSG00000034880, ENSMUSG00000010406, ENSMUSG00000001445	556	23	12504	3.91117	1	0.405586	68.1106
GOTERM_CC_FAT	GO:0005762~mitochondrial large ribosomal subunit	4	0.428725	0.0797538	ENSMUSG00000021607, ENSMUSG00000034880, ENSMUSG00000010406, ENSMUSG00000001445	556	23	12504	3.91117	1	0.405586	68.1106
GOTERM_BP_FAT	GO:0051235~maintenance of location	5	0.535906	0.0634811	ENSMUSG00000052698, ENSMUSG00000029368, ENSMUSG00000003378, ENSMUSG00000002778, ENSMUSG00000032199	627	33	13588	3.28355	1	0.743939	68.3318
GOTERM_MF_FAT	GO:0046983~protein dimerization activity	23	2.46517	0.0739964	ENSMUSG00000000134, ENSMUSG00000069456, ENSMUSG00000004319, ENSMUSG00000003949, ENSMUSG00000017950, ENSMUSG00000034731, ENSMUSG00000032245, ENSMUSG00000028356, ENSMUSG00000022206, ENSMUSG00000042429, ENSMUSG00000016028, ENSMUSG00000029556, ENSMUSG00000030753, ENSMUSG00000024621, ENSMUSG00000071076, ENSMUSG00000024644, ENSMUSG00000026814, ENSMUSG00000034333, ENSMUSG00000030168, ENSMUSG00000041540,…	619	340	13288	1.45217	1	0.805443	68.7948
GOTERM_BP_FAT	GO:0048754~branching morphogenesis of a tube	9	0.96463	0.0646076	ENSMUSG00000029528, ENSMUSG00000018604, ENSMUSG00000020053, ENSMUSG00000026814, ENSMUSG00000008999, ENSMUSG00000030123, ENSMUSG00000032796, ENSMUSG00000015605, ENSMUSG00000005087	627	93	13588	2.09724	1	0.74723	68.9931
GOTERM_BP_FAT	GO:0009314~response to radiation	12	1.28617	0.0661482	ENSMUSG00000026525, ENSMUSG00000031393, ENSMUSG00000026239, ENSMUSG00000046876, ENSMUSG00000057789, ENSMUSG00000024990, ENSMUSG00000034485, ENSMUSG00000050541, ENSMUSG00000030322, ENSMUSG00000026162, ENSMUSG00000024019, ENSMUSG00000005089	627	143	13588	1.81858	1	0.752679	69.8763
INTERPRO	IPR000566:Lipocalin-related protein and Bos/Can/Equ allergen	6	0.643087	0.0728886	ENSMUSG00000019874, ENSMUSG00000066154, ENSMUSG00000028356, ENSMUSG00000062515, ENSMUSG00000024990, ENSMUSG00000078672	816	49	17763	2.66552	1	0.977612	70.7808
GOTERM_BP_FAT	GO:0043543~protein amino acid acylation	6	0.643087	0.0687582	ENSMUSG00000029670, ENSMUSG00000025786, ENSMUSG00000031393, ENSMUSG00000018537, ENSMUSG00000022698, ENSMUSG00000031314	627	48	13588	2.70893	1	0.763492	71.3188
GOTERM_MF_FAT	GO:0016455~RNA polymerase II transcription mediator activity	4	0.428725	0.0799922	ENSMUSG00000061650, ENSMUSG00000045248, ENSMUSG00000022109, ENSMUSG00000015776	619	22	13288	3.90307	1	0.821762	71.7193
GOTERM_BP_FAT	GO:0010876~lipid localization	11	1.17899	0.0713008	ENSMUSG00000032548, ENSMUSG00000020435, ENSMUSG00000029556, ENSMUSG00000029279, ENSMUSG00000011884, ENSMUSG00000024990, ENSMUSG00000060131, ENSMUSG00000024924, ENSMUSG00000032081, ENSMUSG00000037606, ENSMUSG00000032083	627	128	13588	1.86239	1	0.773367	72.6612
GOTERM_BP_FAT	GO:0010817~regulation of hormone levels	11	1.17899	0.0713008	ENSMUSG00000038541, ENSMUSG00000031393, ENSMUSG00000055980, ENSMUSG00000069456, ENSMUSG00000018604, ENSMUSG00000029556, ENSMUSG00000024713, ENSMUSG00000024990, ENSMUSG00000021594, ENSMUSG00000022587, ENSMUSG00000032083	627	128	13588	1.86239	1	0.773367	72.6612
GOTERM_BP_FAT	GO:0043434~response to peptide hormone stimulus	9	0.96463	0.071334	ENSMUSG00000020091, ENSMUSG00000038541, ENSMUSG00000022868, ENSMUSG00000072849, ENSMUSG00000055980, ENSMUSG00000031834, ENSMUSG00000027875, ENSMUSG00000024990, ENSMUSG00000030671	627	95	13588	2.05308	1	0.770685	72.6783
INTERPRO	IPR003034:DNA-binding SAP	4	0.428725	0.0775181	ENSMUSG00000009569, ENSMUSG00000042292, ENSMUSG00000042625, ENSMUSG00000078427	816	22	17763	3.95789	1	0.979651	73.0645
GOTERM_MF_FAT	GO:0005539~glycosaminoglycan binding	10	1.07181	0.0837378	ENSMUSG00000035459, ENSMUSG00000004098, ENSMUSG00000017344, ENSMUSG00000053846, ENSMUSG00000029103, ENSMUSG00000036585, ENSMUSG00000008999, ENSMUSG00000072115, ENSMUSG00000005087, ENSMUSG00000035270	619	114	13288	1.88306	1	0.827744	73.4142
GOTERM_BP_FAT	GO:0001655~urogenital system development	12	1.28617	0.0743123	ENSMUSG00000031665, ENSMUSG00000037992, ENSMUSG00000037003, ENSMUSG00000015846, ENSMUSG00000025001, ENSMUSG00000038000, ENSMUSG00000024713, ENSMUSG00000020053, ENSMUSG00000008999, ENSMUSG00000024990, ENSMUSG00000005087, ENSMUSG00000022292	627	146	13588	1.78122	1	0.782112	74.1745
GOTERM_BP_FAT	GO:0016569~covalent chromatin modification	9	0.96463	0.0748512	ENSMUSG00000029670, ENSMUSG00000031393, ENSMUSG00000006456, ENSMUSG00000018537, ENSMUSG00000025001, ENSMUSG00000053483, ENSMUSG00000031314, ENSMUSG00000059851, ENSMUSG00000024019	627	96	13588	2.0317	1	0.781852	74.4368
GOTERM_BP_FAT	GO:0006576~biogenic amine metabolic process	8	0.857449	0.0751782	ENSMUSG00000031393, ENSMUSG00000036833, ENSMUSG00000033792, ENSMUSG00000025464, ENSMUSG00000070644, ENSMUSG00000022587, ENSMUSG00000020334, ENSMUSG00000000301	627	80	13588	2.16715	1	0.780622	74.5948
GOTERM_CC_FAT	GO:0070161~anchoring junction	10	1.07181	0.0963633	ENSMUSG00000037003, ENSMUSG00000029528, ENSMUSG00000052698, ENSMUSG00000030774, ENSMUSG00000019851, ENSMUSG00000021262, ENSMUSG00000034664, ENSMUSG00000044042, ENSMUSG00000029860, ENSMUSG00000031216	556	123	12504	1.82839	1	0.463895	75.1758
GOTERM_MF_FAT	GO:0009055~electron carrier activity	15	1.60772	0.0887733	ENSMUSG00000074254, ENSMUSG00000015224, ENSMUSG00000056035, ENSMUSG00000024248, ENSMUSG00000038489, ENSMUSG00000064351, ENSMUSG00000027983, ENSMUSG00000064370, ENSMUSG00000079677, ENSMUSG00000064354, ENSMUSG00000028713, ENSMUSG00000025197, ENSMUSG00000023963, ENSMUSG00000025464, ENSMUSG00000006471	619	202	13288	1.59408	1	0.837824	75.5435
GOTERM_MF_FAT	GO:0015002~heme-copper terminal oxidase activity	4	0.428725	0.0889497	ENSMUSG00000064356, ENSMUSG00000064357, ENSMUSG00000064358, ENSMUSG00000024248, ENSMUSG00000064351, ENSMUSG00000064354	619	23	13288	3.73337	1	0.830498	75.6151
GOTERM_MF_FAT	GO:0016675~oxidoreductase activity, acting on heme group of donors	4	0.428725	0.0889497	ENSMUSG00000064356, ENSMUSG00000064357, ENSMUSG00000064358, ENSMUSG00000024248, ENSMUSG00000064351, ENSMUSG00000064354	619	23	13288	3.73337	1	0.830498	75.6151
GOTERM_MF_FAT	GO:0004129~cytochrome-c oxidase activity	4	0.428725	0.0889497	ENSMUSG00000064356, ENSMUSG00000064357, ENSMUSG00000064358, ENSMUSG00000024248, ENSMUSG00000064351, ENSMUSG00000064354	619	23	13288	3.73337	1	0.830498	75.6151
GOTERM_MF_FAT	GO:0016676~oxidoreductase activity, acting on heme group of donors, oxygen as acceptor	4	0.428725	0.0889497	ENSMUSG00000064356, ENSMUSG00000064357, ENSMUSG00000064358, ENSMUSG00000024248, ENSMUSG00000064351, ENSMUSG00000064354	619	23	13288	3.73337	1	0.830498	75.6151
INTERPRO	IPR000571:Zinc finger, CCCH-type	6	0.643087	0.0834733	ENSMUSG00000021127, ENSMUSG00000022000, ENSMUSG00000009076, ENSMUSG00000078765, ENSMUSG00000018727, ENSMUSG00000044786	816	51	17763	2.56099	1	0.982604	75.7563
GOTERM_BP_FAT	GO:0048585~negative regulation of response to stimulus	7	0.750268	0.0781148	ENSMUSG00000019874, ENSMUSG00000022868, ENSMUSG00000042429, ENSMUSG00000022508, ENSMUSG00000034485, ENSMUSG00000044786, ENSMUSG00000068686	627	65	13588	2.33385	1	0.791091	75.9725
GOTERM_BP_FAT	GO:0043254~regulation of protein complex assembly	7	0.750268	0.0781148	ENSMUSG00000026755, ENSMUSG00000021262, ENSMUSG00000029675, ENSMUSG00000044042, ENSMUSG00000029621, ENSMUSG00000020315, ENSMUSG00000020120	627	65	13588	2.33385	1	0.791091	75.9725
GOTERM_CC_FAT	GO:0005912~adherens junction	9	0.96463	0.0987179	ENSMUSG00000037003, ENSMUSG00000029528, ENSMUSG00000052698, ENSMUSG00000030774, ENSMUSG00000021262, ENSMUSG00000034664, ENSMUSG00000044042, ENSMUSG00000029860, ENSMUSG00000031216	556	106	12504	1.90946	1	0.466779	76.0507
GOTERM_MF_FAT	GO:0008201~heparin binding	8	0.857449	0.0910099	ENSMUSG00000004098, ENSMUSG00000017344, ENSMUSG00000053846, ENSMUSG00000029103, ENSMUSG00000036585, ENSMUSG00000008999, ENSMUSG00000072115, ENSMUSG00000035270	619	83	13288	2.0691	1	0.829906	76.4372
GOTERM_BP_FAT	GO:0009725~response to hormone stimulus	13	1.39335	0.0791619	ENSMUSG00000020091, ENSMUSG00000038541, ENSMUSG00000055980, ENSMUSG00000022868, ENSMUSG00000072849, ENSMUSG00000031834, ENSMUSG00000027875, ENSMUSG00000000948, ENSMUSG00000024990, ENSMUSG00000062515, ENSMUSG00000030671, ENSMUSG00000030168, ENSMUSG00000057722	627	165	13588	1.70745	1	0.792978	76.4466
INTERPRO	IPR001739:Methyl-CpG DNA binding	3	0.321543	0.0878909	ENSMUSG00000031393, ENSMUSG00000025409, ENSMUSG00000030322	816	11	17763	5.93683	1	0.98381	77.5877
GOTERM_BP_FAT	GO:0006473~protein amino acid acetylation	5	0.535906	0.0821857	ENSMUSG00000029670, ENSMUSG00000031393, ENSMUSG00000018537, ENSMUSG00000022698, ENSMUSG00000031314	627	36	13588	3.00992	1	0.803018	77.7664
INTERPRO	IPR012674:Calycin	6	0.643087	0.0890537	ENSMUSG00000019874, ENSMUSG00000066154, ENSMUSG00000028356, ENSMUSG00000062515, ENSMUSG00000024990, ENSMUSG00000078672	816	52	17763	2.51174	1	0.982339	78.0476
INTERPRO	IPR016636:3-oxo-5-alpha-steroid 4-dehydrogenase	2	0.214362	0.0896611	ENSMUSG00000038541, ENSMUSG00000021594	816	2	17763	21.7684	1	0.980351	78.2844
INTERPRO	IPR004552:1-acyl-sn-glycerol-3-phosphate acyltransferase	2	0.214362	0.0896611	ENSMUSG00000034254, ENSMUSG00000026922	816	2	17763	21.7684	1	0.980351	78.2844
INTERPRO	IPR010515:Collagenase NC10 and endostatin	2	0.214362	0.0896611	ENSMUSG00000001435, ENSMUSG00000028339	816	2	17763	21.7684	1	0.980351	78.2844
INTERPRO	IPR005559:CG-1	2	0.214362	0.0896611	ENSMUSG00000040712, ENSMUSG00000014592	816	2	17763	21.7684	1	0.980351	78.2844
INTERPRO	IPR001363:Proteinase inhibitor I25C, fetuin, conserved site	2	0.214362	0.0896611	ENSMUSG00000022868, ENSMUSG00000022871	816	2	17763	21.7684	1	0.980351	78.2844
GOTERM_BP_FAT	GO:0035107~appendage morphogenesis	10	1.07181	0.0835031	ENSMUSG00000018604, ENSMUSG00000029556, ENSMUSG00000038000, ENSMUSG00000024713, ENSMUSG00000044042, ENSMUSG00000033792, ENSMUSG00000057789, ENSMUSG00000047193, ENSMUSG00000047264, ENSMUSG00000000149	627	115	13588	1.88447	1	0.805776	78.3193
GOTERM_BP_FAT	GO:0035108~limb morphogenesis	10	1.07181	0.0835031	ENSMUSG00000018604, ENSMUSG00000029556, ENSMUSG00000038000, ENSMUSG00000024713, ENSMUSG00000044042, ENSMUSG00000033792, ENSMUSG00000057789, ENSMUSG00000047193, ENSMUSG00000047264, ENSMUSG00000000149	627	115	13588	1.88447	1	0.805776	78.3193
GOTERM_MF_FAT	GO:0050136~NADH dehydrogenase (quinone) activity	4	0.428725	0.0983054	ENSMUSG00000064341, ENSMUSG00000064367, ENSMUSG00000064345, ENSMUSG00000064363	619	24	13288	3.57781	1	0.846335	79.145
GOTERM_MF_FAT	GO:0003954~NADH dehydrogenase activity	4	0.428725	0.0983054	ENSMUSG00000064341, ENSMUSG00000064367, ENSMUSG00000064345, ENSMUSG00000064363	619	24	13288	3.57781	1	0.846335	79.145
GOTERM_MF_FAT	GO:0008137~NADH dehydrogenase (ubiquinone) activity	4	0.428725	0.0983054	ENSMUSG00000064341, ENSMUSG00000064367, ENSMUSG00000064345, ENSMUSG00000064363	619	24	13288	3.57781	1	0.846335	79.145
GOTERM_BP_FAT	GO:0008630~DNA damage response, signal transduction resulting in induction of apoptosis	4	0.428725	0.0870206	ENSMUSG00000061436, ENSMUSG00000002083, ENSMUSG00000034485, ENSMUSG00000030322	627	23	13588	3.76895	1	0.816866	79.7328
GOTERM_BP_FAT	GO:0006695~cholesterol biosynthetic process	4	0.428725	0.0870206	ENSMUSG00000027875, ENSMUSG00000058454, ENSMUSG00000045294, ENSMUSG00000032083	627	23	13588	3.76895	1	0.816866	79.7328
GOTERM_BP_FAT	GO:0007264~small GTPase mediated signal transduction	18	1.92926	0.0877364	ENSMUSG00000035711, ENSMUSG00000054855, ENSMUSG00000022508, ENSMUSG00000029518, ENSMUSG00000028868, ENSMUSG00000025733, ENSMUSG00000033220, ENSMUSG00000022102, ENSMUSG00000025422, ENSMUSG00000002489, ENSMUSG00000039844, ENSMUSG00000044147, ENSMUSG00000026426, ENSMUSG00000020121, ENSMUSG00000033721, ENSMUSG00000016637, ENSMUSG00000000149, ENSMUSG00000073982	627	258	13588	1.51196	1	0.817094	80.0096
INTERPRO	IPR013088:Zinc finger, NHR/GATA-type	6	0.643087	0.0948225	ENSMUSG00000037992, ENSMUSG00000015846, ENSMUSG00000060601, ENSMUSG00000017950, ENSMUSG00000032238, ENSMUSG00000020889	816	53	17763	2.46435	1	0.982282	80.2017
INTERPRO	IPR000449:Ubiquitin-associated/translation elongation factor EF1B, N-terminal	5	0.535906	0.0949686	ENSMUSG00000055720, ENSMUSG00000003813, ENSMUSG00000022791, ENSMUSG00000008604, ENSMUSG00000042520	816	38	17763	2.86426	1	0.980029	80.2536
GOTERM_BP_FAT	GO:0030325~adrenal gland development	3	0.321543	0.0884985	ENSMUSG00000039910, ENSMUSG00000022587, ENSMUSG00000032083	627	11	13588	5.9104	1	0.817492	80.3004
INTERPRO	IPR011598:Helix-loop-helix DNA-binding	8	0.857449	0.0951044	ENSMUSG00000004263, ENSMUSG00000022463, ENSMUSG00000000134, ENSMUSG00000038342, ENSMUSG00000026077, ENSMUSG00000037621, ENSMUSG00000029553, ENSMUSG00000000282	816	85	17763	2.04879	1	0.977642	80.3017
GOTERM_BP_FAT	GO:0006352~transcription initiation	5	0.535906	0.0889597	ENSMUSG00000039117, ENSMUSG00000024218, ENSMUSG00000026803, ENSMUSG00000031314, ENSMUSG00000052293	627	37	13588	2.92857	1	0.816785	80.4744
GOTERM_BP_FAT	GO:0010561~negative regulation of glycoprotein biosynthetic process	2	0.214362	0.0900209	ENSMUSG00000040605, ENSMUSG00000018697	627	2	13588	21.6715	1	0.818265	80.8693
GOTERM_BP_FAT	GO:0045010~actin nucleation	2	0.214362	0.0900209	ENSMUSG00000021262, ENSMUSG00000029684	627	2	13588	21.6715	1	0.818265	80.8693
GOTERM_BP_FAT	GO:0042985~negative regulation of amyloid precursor protein biosynthetic process	2	0.214362	0.0900209	ENSMUSG00000040605, ENSMUSG00000018697	627	2	13588	21.6715	1	0.818265	80.8693
GOTERM_BP_FAT	GO:0030573~bile acid catabolic process	2	0.214362	0.0900209	ENSMUSG00000038641, ENSMUSG00000023963	627	2	13588	21.6715	1	0.818265	80.8693
GOTERM_BP_FAT	GO:0034754~cellular hormone metabolic process	6	0.643087	0.0901578	ENSMUSG00000038541, ENSMUSG00000031393, ENSMUSG00000069456, ENSMUSG00000024990, ENSMUSG00000021594, ENSMUSG00000032083	627	52	13588	2.50055	1	0.816399	80.9197
GOTERM_BP_FAT	GO:0048332~mesoderm morphogenesis	5	0.535906	0.0959931	ENSMUSG00000028649, ENSMUSG00000018604, ENSMUSG00000029556, ENSMUSG00000031681, ENSMUSG00000008999	627	38	13588	2.85151	1	0.834171	82.9551
GOTERM_BP_FAT	GO:0030834~regulation of actin filament depolymerization	4	0.428725	0.0962023	ENSMUSG00000021262, ENSMUSG00000020315, ENSMUSG00000056201, ENSMUSG00000020120	627	24	13588	3.61191	1	0.832619	83.0241
GOTERM_BP_FAT	GO:0035239~tube morphogenesis	13	1.39335	0.0968771	ENSMUSG00000038593, ENSMUSG00000020053, ENSMUSG00000028266, ENSMUSG00000030123, ENSMUSG00000015605, ENSMUSG00000016028, ENSMUSG00000029528, ENSMUSG00000018604, ENSMUSG00000026814, ENSMUSG00000008999, ENSMUSG00000056201, ENSMUSG00000032796, ENSMUSG00000005087	627	171	13588	1.64754	1	0.832596	83.245
GOTERM_BP_FAT	GO:0006397~mRNA processing	18	1.92926	0.0971431	ENSMUSG00000034120, ENSMUSG00000021413, ENSMUSG00000006498, ENSMUSG00000060373, ENSMUSG00000078765, ENSMUSG00000028809, ENSMUSG00000038374, ENSMUSG00000028639, ENSMUSG00000024949, ENSMUSG00000029402, ENSMUSG00000063480, ENSMUSG00000009076, ENSMUSG00000068856, ENSMUSG00000044709, ENSMUSG00000061479, ENSMUSG00000044786, ENSMUSG00000020211, ENSMUSG00000046434	627	262	13588	1.48888	1	0.831249	83.3313
GOTERM_BP_FAT	GO:0048736~appendage development	10	1.07181	0.0981957	ENSMUSG00000018604, ENSMUSG00000029556, ENSMUSG00000038000, ENSMUSG00000024713, ENSMUSG00000044042, ENSMUSG00000033792, ENSMUSG00000057789, ENSMUSG00000047193, ENSMUSG00000047264, ENSMUSG00000000149	627	119	13588	1.82113	1	0.832455	83.6687
GOTERM_BP_FAT	GO:0060173~limb development	10	1.07181	0.0981957	ENSMUSG00000018604, ENSMUSG00000029556, ENSMUSG00000038000, ENSMUSG00000024713, ENSMUSG00000044042, ENSMUSG00000033792, ENSMUSG00000057789, ENSMUSG00000047193, ENSMUSG00000047264, ENSMUSG00000000149	627	119	13588	1.82113	1	0.832455	83.6687
GOTERM_BP_FAT	GO:0051301~cell division	19	2.03644	0.0988027	ENSMUSG00000059248, ENSMUSG00000049327, ENSMUSG00000021537, ENSMUSG00000018697, ENSMUSG00000026749, ENSMUSG00000040945, ENSMUSG00000024990, ENSMUSG00000020914, ENSMUSG00000050379, ENSMUSG00000024019, ENSMUSG00000029003, ENSMUSG00000025001, ENSMUSG00000038990, ENSMUSG00000026426, ENSMUSG00000056201, ENSMUSG00000032300, ENSMUSG00000002055, ENSMUSG00000011831, ENSMUSG00000015120	627	281	13588	1.46533	1	0.832222	83.8604

## Sheet: GO_Diff_TE_genes_640(up_in_liv)
Category	Term	Count	%	PValue	Genes	List Total	Pop Hits	Pop Total	Fold Enrichment	Bonferroni	Benjamini	FDR
GOTERM_BP_FAT	GO:0006350~transcription	106	17.0692	7.89636e-12	ENSMUSG00000003575, ENSMUSG00000009569, ENSMUSG00000032398, ENSMUSG00000000134, ENSMUSG00000029178, ENSMUSG00000063382, ENSMUSG00000024260, ENSMUSG00000022508, ENSMUSG00000038418, ENSMUSG00000020889, ENSMUSG00000000282, ENSMUSG00000038415, ENSMUSG00000055148, ENSMUSG00000053483, ENSMUSG00000029684, ENSMUSG00000046711, ENSMUSG00000030087, ENSMUSG00000073423, ENSMUSG00000022463, ENSMUSG00000045248,…	418	1772	13588	1.94456	1.40081e-08	1.40081e-08	1.33862e-08
GOTERM_BP_FAT	GO:0045449~regulation of transcription	119	19.1626	3.85935e-10	ENSMUSG00000003575, ENSMUSG00000009569, ENSMUSG00000000134, ENSMUSG00000032398, ENSMUSG00000029178, ENSMUSG00000063382, ENSMUSG00000024260, ENSMUSG00000022508, ENSMUSG00000038418, ENSMUSG00000020889, ENSMUSG00000000282, ENSMUSG00000038415, ENSMUSG00000055148, ENSMUSG00000026436, ENSMUSG00000053483, ENSMUSG00000059474, ENSMUSG00000029684, ENSMUSG00000046711, ENSMUSG00000030087, ENSMUSG00000073423,…	418	2227	13588	1.73702	6.84648e-07	3.42324e-07	6.54253e-07
GOTERM_MF_FAT	GO:0030528~transcription regulator activity	74	11.9163	1.23374e-09	ENSMUSG00000003575, ENSMUSG00000004263, ENSMUSG00000009569, ENSMUSG00000000134, ENSMUSG00000049086, ENSMUSG00000003949, ENSMUSG00000042292, ENSMUSG00000072294, ENSMUSG00000040721, ENSMUSG00000022508, ENSMUSG00000038418, ENSMUSG00000020889, ENSMUSG00000000282, ENSMUSG00000021366, ENSMUSG00000038415, ENSMUSG00000037992, ENSMUSG00000026436, ENSMUSG00000055148, ENSMUSG00000018604, ENSMUSG00000047907,…	390	1206	13288	2.09064	6.35374e-07	6.35374e-07	1.78402e-06
GOTERM_BP_FAT	GO:0010628~positive regulation of gene expression	41	6.60225	1.4406e-08	ENSMUSG00000003575, ENSMUSG00000009569, ENSMUSG00000000134, ENSMUSG00000017950, ENSMUSG00000042292, ENSMUSG00000020053, ENSMUSG00000072294, ENSMUSG00000038418, ENSMUSG00000056493, ENSMUSG00000032897, ENSMUSG00000028565, ENSMUSG00000061436, ENSMUSG00000037992, ENSMUSG00000055148, ENSMUSG00000031902, ENSMUSG00000015846, ENSMUSG00000018604, ENSMUSG00000053483, ENSMUSG00000031681, ENSMUSG00000032238,…	418	488	13588	2.73114	2.55559e-05	8.51871e-06	2.44217e-05
GOTERM_BP_FAT	GO:0006357~regulation of transcription from RNA polymerase II promoter	47	7.56844	2.03403e-08	ENSMUSG00000003575, ENSMUSG00000009569, ENSMUSG00000004263, ENSMUSG00000000134, ENSMUSG00000017950, ENSMUSG00000054452, ENSMUSG00000007872, ENSMUSG00000020053, ENSMUSG00000072294, ENSMUSG00000022508, ENSMUSG00000038418, ENSMUSG00000056493, ENSMUSG00000021366, ENSMUSG00000028565, ENSMUSG00000037992, ENSMUSG00000061436, ENSMUSG00000031902, ENSMUSG00000015846, ENSMUSG00000018537, ENSMUSG00000039117,…	418	616	13588	2.48026	3.6083e-05	9.02087e-06	3.44817e-05
GOTERM_BP_FAT	GO:0045941~positive regulation of transcription	40	6.44122	2.11304e-08	ENSMUSG00000003575, ENSMUSG00000009569, ENSMUSG00000000134, ENSMUSG00000017950, ENSMUSG00000042292, ENSMUSG00000020053, ENSMUSG00000072294, ENSMUSG00000038418, ENSMUSG00000056493, ENSMUSG00000032897, ENSMUSG00000028565, ENSMUSG00000061436, ENSMUSG00000037992, ENSMUSG00000055148, ENSMUSG00000031902, ENSMUSG00000015846, ENSMUSG00000018604, ENSMUSG00000053483, ENSMUSG00000031681, ENSMUSG00000032238,…	418	475	13588	2.73745	3.74847e-05	7.49705e-06	3.58212e-05
GOTERM_BP_FAT	GO:0045935~positive regulation of nucleobase, nucleoside, nucleotide and nucleic acid metabolic process	41	6.60225	4.88644e-08	ENSMUSG00000003575, ENSMUSG00000009569, ENSMUSG00000000134, ENSMUSG00000017950, ENSMUSG00000042292, ENSMUSG00000020053, ENSMUSG00000072294, ENSMUSG00000038418, ENSMUSG00000056493, ENSMUSG00000032897, ENSMUSG00000024019, ENSMUSG00000028565, ENSMUSG00000061436, ENSMUSG00000037992, ENSMUSG00000055148, ENSMUSG00000031902, ENSMUSG00000015846, ENSMUSG00000018604, ENSMUSG00000053483, ENSMUSG00000031681,…	418	510	13588	2.61332	8.66818e-05	1.44475e-05	8.28371e-05
GOTERM_BP_FAT	GO:0045893~positive regulation of transcription, DNA-dependent	36	5.7971	6.42012e-08	ENSMUSG00000003575, ENSMUSG00000009569, ENSMUSG00000000134, ENSMUSG00000017950, ENSMUSG00000020053, ENSMUSG00000072294, ENSMUSG00000038418, ENSMUSG00000056493, ENSMUSG00000032897, ENSMUSG00000028565, ENSMUSG00000061436, ENSMUSG00000037992, ENSMUSG00000031902, ENSMUSG00000015846, ENSMUSG00000018604, ENSMUSG00000053483, ENSMUSG00000031681, ENSMUSG00000032238, ENSMUSG00000046876, ENSMUSG00000026077,…	418	416	13588	2.81312	0.000113886	1.62703e-05	0.000108837
GOTERM_BP_FAT	GO:0051254~positive regulation of RNA metabolic process	36	5.7971	7.59148e-08	ENSMUSG00000003575, ENSMUSG00000009569, ENSMUSG00000000134, ENSMUSG00000017950, ENSMUSG00000020053, ENSMUSG00000072294, ENSMUSG00000038418, ENSMUSG00000056493, ENSMUSG00000032897, ENSMUSG00000028565, ENSMUSG00000061436, ENSMUSG00000037992, ENSMUSG00000031902, ENSMUSG00000015846, ENSMUSG00000018604, ENSMUSG00000053483, ENSMUSG00000031681, ENSMUSG00000032238, ENSMUSG00000046876, ENSMUSG00000026077,…	418	419	13588	2.79298	0.000134664	1.6834e-05	0.000128694
GOTERM_MF_FAT	GO:0046914~transition metal ion binding	120	19.3237	1.11182e-07	ENSMUSG00000021127, ENSMUSG00000029178, ENSMUSG00000025203, ENSMUSG00000066440, ENSMUSG00000022508, ENSMUSG00000038418, ENSMUSG00000020889, ENSMUSG00000001844, ENSMUSG00000055148, ENSMUSG00000024050, ENSMUSG00000025197, ENSMUSG00000059474, ENSMUSG00000030087, ENSMUSG00000073423, ENSMUSG00000034248, ENSMUSG00000025786, ENSMUSG00000072872, ENSMUSG00000055917, ENSMUSG00000049764, ENSMUSG00000033623,…	390	2608	13288	1.56772	5.72571e-05	2.8629e-05	0.000160772
GOTERM_BP_FAT	GO:0051173~positive regulation of nitrogen compound metabolic process	41	6.60225	1.12455e-07	ENSMUSG00000003575, ENSMUSG00000009569, ENSMUSG00000000134, ENSMUSG00000017950, ENSMUSG00000042292, ENSMUSG00000020053, ENSMUSG00000072294, ENSMUSG00000038418, ENSMUSG00000056493, ENSMUSG00000032897, ENSMUSG00000024019, ENSMUSG00000028565, ENSMUSG00000061436, ENSMUSG00000037992, ENSMUSG00000055148, ENSMUSG00000031902, ENSMUSG00000015846, ENSMUSG00000018604, ENSMUSG00000053483, ENSMUSG00000031681,…	418	526	13588	2.53383	0.000199476	2.2166e-05	0.000190639
GOTERM_MF_FAT	GO:0003677~DNA binding	89	14.3317	3.31816e-07	ENSMUSG00000018678, ENSMUSG00000021127, ENSMUSG00000027551, ENSMUSG00000000134, ENSMUSG00000049086, ENSMUSG00000056851, ENSMUSG00000029178, ENSMUSG00000003949, ENSMUSG00000060743, ENSMUSG00000028809, ENSMUSG00000051550, ENSMUSG00000072294, ENSMUSG00000040721, ENSMUSG00000022508, ENSMUSG00000038418, ENSMUSG00000020889, ENSMUSG00000000282, ENSMUSG00000021366, ENSMUSG00000038415, ENSMUSG00000037992,…	390	1781	13288	1.70263	0.000170871	5.69602e-05	0.000479814
GOTERM_BP_FAT	GO:0010604~positive regulation of macromolecule metabolic process	45	7.24638	3.25496e-07	ENSMUSG00000003575, ENSMUSG00000009569, ENSMUSG00000000134, ENSMUSG00000017950, ENSMUSG00000042292, ENSMUSG00000020053, ENSMUSG00000072294, ENSMUSG00000038418, ENSMUSG00000056493, ENSMUSG00000032897, ENSMUSG00000024019, ENSMUSG00000028565, ENSMUSG00000037992, ENSMUSG00000061436, ENSMUSG00000042429, ENSMUSG00000055148, ENSMUSG00000031902, ENSMUSG00000015846, ENSMUSG00000018604, ENSMUSG00000053483,…	418	633	13588	2.31094	0.000577263	5.77413e-05	0.000551793
GOTERM_BP_FAT	GO:0010557~positive regulation of macromolecule biosynthetic process	40	6.44122	3.81385e-07	ENSMUSG00000003575, ENSMUSG00000009569, ENSMUSG00000000134, ENSMUSG00000017950, ENSMUSG00000042292, ENSMUSG00000020053, ENSMUSG00000072294, ENSMUSG00000038418, ENSMUSG00000056493, ENSMUSG00000032897, ENSMUSG00000028565, ENSMUSG00000061436, ENSMUSG00000037992, ENSMUSG00000055148, ENSMUSG00000031902, ENSMUSG00000015846, ENSMUSG00000018604, ENSMUSG00000053483, ENSMUSG00000031681, ENSMUSG00000032238,…	418	530	13588	2.45337	0.000676348	6.15051e-05	0.000646538
GOTERM_BP_FAT	GO:0045944~positive regulation of transcription from RNA polymerase II promoter	31	4.99195	6.32422e-07	ENSMUSG00000003575, ENSMUSG00000009569, ENSMUSG00000000134, ENSMUSG00000017950, ENSMUSG00000020053, ENSMUSG00000072294, ENSMUSG00000038418, ENSMUSG00000028565, ENSMUSG00000061436, ENSMUSG00000037992, ENSMUSG00000031902, ENSMUSG00000015846, ENSMUSG00000031681, ENSMUSG00000032238, ENSMUSG00000046876, ENSMUSG00000026077, ENSMUSG00000008999, ENSMUSG00000032735, ENSMUSG00000052293, ENSMUSG00000041540,…	418	358	13588	2.81487	0.00112129	9.34887e-05	0.0010721
GOTERM_BP_FAT	GO:0031328~positive regulation of cellular biosynthetic process	40	6.44122	1.05755e-06	ENSMUSG00000003575, ENSMUSG00000009569, ENSMUSG00000000134, ENSMUSG00000017950, ENSMUSG00000042292, ENSMUSG00000020053, ENSMUSG00000072294, ENSMUSG00000038418, ENSMUSG00000056493, ENSMUSG00000032897, ENSMUSG00000028565, ENSMUSG00000061436, ENSMUSG00000037992, ENSMUSG00000055148, ENSMUSG00000031902, ENSMUSG00000015846, ENSMUSG00000018604, ENSMUSG00000053483, ENSMUSG00000031681, ENSMUSG00000032238,…	418	552	13588	2.35559	0.00187433	0.000144304	0.00179279
GOTERM_BP_FAT	GO:0009891~positive regulation of biosynthetic process	40	6.44122	1.32296e-06	ENSMUSG00000003575, ENSMUSG00000009569, ENSMUSG00000000134, ENSMUSG00000017950, ENSMUSG00000042292, ENSMUSG00000020053, ENSMUSG00000072294, ENSMUSG00000038418, ENSMUSG00000056493, ENSMUSG00000032897, ENSMUSG00000028565, ENSMUSG00000061436, ENSMUSG00000037992, ENSMUSG00000055148, ENSMUSG00000031902, ENSMUSG00000015846, ENSMUSG00000018604, ENSMUSG00000053483, ENSMUSG00000031681, ENSMUSG00000032238,…	418	557	13588	2.33445	0.00234419	0.000167624	0.00224272
GOTERM_MF_FAT	GO:0008270~zinc ion binding	98	15.781	1.79028e-06	ENSMUSG00000018678, ENSMUSG00000027551, ENSMUSG00000021127, ENSMUSG00000029178, ENSMUSG00000066440, ENSMUSG00000051550, ENSMUSG00000040721, ENSMUSG00000072294, ENSMUSG00000022508, ENSMUSG00000024327, ENSMUSG00000036073, ENSMUSG00000038418, ENSMUSG00000020889, ENSMUSG00000001844, ENSMUSG00000024019, ENSMUSG00000021366, ENSMUSG00000027016, ENSMUSG00000035476, ENSMUSG00000037003, ENSMUSG00000037992,…	390	2105	13288	1.58624	0.000921572	0.000230473	0.00258877
INTERPRO	IPR007087:Zinc finger, C2H2-type	44	7.08535	2.99461e-06	ENSMUSG00000018678, ENSMUSG00000027551, ENSMUSG00000028799, ENSMUSG00000029178, ENSMUSG00000049295, ENSMUSG00000046404, ENSMUSG00000048921, ENSMUSG00000040721, ENSMUSG00000072294, ENSMUSG00000051550, ENSMUSG00000022508, ENSMUSG00000038418, ENSMUSG00000058886, ENSMUSG00000021366, ENSMUSG00000027016, ENSMUSG00000031665, ENSMUSG00000055148, ENSMUSG00000047907, ENSMUSG00000024050, ENSMUSG00000014550,…	530	681	17763	2.16544	0.00248244	0.00248244	0.00461887
GOTERM_CC_FAT	GO:0044429~mitochondrial part	34	5.47504	6.15459e-06	ENSMUSG00000005674, ENSMUSG00000021607, ENSMUSG00000018677, ENSMUSG00000034880, ENSMUSG00000038967, ENSMUSG00000025733, ENSMUSG00000064345, ENSMUSG00000001445, ENSMUSG00000064341, ENSMUSG00000064367, ENSMUSG00000021967, ENSMUSG00000057789, ENSMUSG00000024981, ENSMUSG00000061474, ENSMUSG00000034248, ENSMUSG00000025270, ENSMUSG00000054630, ENSMUSG00000064351, ENSMUSG00000064370, ENSMUSG00000078713,…	341	524	12504	2.37926	0.00180168	0.00180168	0.00819446
INTERPRO	IPR015880:Zinc finger, C2H2-like	43	6.92432	5.88552e-06	ENSMUSG00000018678, ENSMUSG00000027551, ENSMUSG00000028799, ENSMUSG00000029178, ENSMUSG00000049295, ENSMUSG00000046404, ENSMUSG00000048921, ENSMUSG00000040721, ENSMUSG00000072294, ENSMUSG00000051550, ENSMUSG00000022508, ENSMUSG00000038418, ENSMUSG00000021366, ENSMUSG00000027016, ENSMUSG00000031665, ENSMUSG00000055148, ENSMUSG00000047907, ENSMUSG00000024050, ENSMUSG00000014550, ENSMUSG00000020659,…	530	676	17763	2.13188	0.00487309	0.00243952	0.0090776
GOTERM_MF_FAT	GO:0003700~transcription factor activity	46	7.40741	8.52158e-06	ENSMUSG00000000134, ENSMUSG00000049086, ENSMUSG00000049295, ENSMUSG00000017950, ENSMUSG00000003949, ENSMUSG00000040721, ENSMUSG00000072294, ENSMUSG00000037583, ENSMUSG00000038418, ENSMUSG00000020889, ENSMUSG00000056493, ENSMUSG00000000282, ENSMUSG00000032897, ENSMUSG00000038415, ENSMUSG00000028565, ENSMUSG00000037992, ENSMUSG00000055148, ENSMUSG00000026436, ENSMUSG00000031902, ENSMUSG00000018604,…	390	776	13288	2.01972	0.00437901	0.000877341	0.0123217
GOTERM_BP_FAT	GO:0008610~lipid biosynthetic process	25	4.02576	7.79625e-06	ENSMUSG00000058454, ENSMUSG00000038641, ENSMUSG00000023452, ENSMUSG00000006390, ENSMUSG00000025203, ENSMUSG00000026811, ENSMUSG00000037071, ENSMUSG00000072115, ENSMUSG00000079469, ENSMUSG00000000301, ENSMUSG00000032349, ENSMUSG00000057342, ENSMUSG00000017721, ENSMUSG00000010607, ENSMUSG00000021252, ENSMUSG00000027875, ENSMUSG00000029556, ENSMUSG00000045294, ENSMUSG00000023963, ENSMUSG00000070644,…	418	285	13588	2.85151	0.0137354	0.000921615	0.0132157
GOTERM_BP_FAT	GO:0051252~regulation of RNA metabolic process	75	12.0773	1.68679e-05	ENSMUSG00000003575, ENSMUSG00000004263, ENSMUSG00000009569, ENSMUSG00000021127, ENSMUSG00000000134, ENSMUSG00000049086, ENSMUSG00000003949, ENSMUSG00000072294, ENSMUSG00000040721, ENSMUSG00000022508, ENSMUSG00000038418, ENSMUSG00000020889, ENSMUSG00000000282, ENSMUSG00000021366, ENSMUSG00000038415, ENSMUSG00000037992, ENSMUSG00000026436, ENSMUSG00000018537, ENSMUSG00000018604, ENSMUSG00000047907,…	418	1488	13588	1.63847	0.0294806	0.0018685	0.0285913
GOTERM_BP_FAT	GO:0006355~regulation of transcription, DNA-dependent	73	11.7552	3.3756e-05	ENSMUSG00000003575, ENSMUSG00000004263, ENSMUSG00000009569, ENSMUSG00000000134, ENSMUSG00000049086, ENSMUSG00000003949, ENSMUSG00000072294, ENSMUSG00000040721, ENSMUSG00000022508, ENSMUSG00000038418, ENSMUSG00000020889, ENSMUSG00000000282, ENSMUSG00000021366, ENSMUSG00000038415, ENSMUSG00000037992, ENSMUSG00000026436, ENSMUSG00000018537, ENSMUSG00000018604, ENSMUSG00000047907, ENSMUSG00000053483,…	418	1465	13588	1.61981	0.0581263	0.0035164	0.0572092
INTERPRO	IPR019955:Ubiquitin supergroup	9	1.44928	0.000104701	ENSMUSG00000055720, ENSMUSG00000025171, ENSMUSG00000035621, ENSMUSG00000041827, ENSMUSG00000003813, ENSMUSG00000027466, ENSMUSG00000028958, ENSMUSG00000008604, ENSMUSG00000055553	530	50	17763	6.03272	0.0832371	0.0285532	0.161372
GOTERM_MF_FAT	GO:0008134~transcription factor binding	22	3.54267	0.000116682	ENSMUSG00000003575, ENSMUSG00000004263, ENSMUSG00000009569, ENSMUSG00000017376, ENSMUSG00000041164, ENSMUSG00000072872, ENSMUSG00000027490, ENSMUSG00000017950, ENSMUSG00000007777, ENSMUSG00000007872, ENSMUSG00000054452, ENSMUSG00000042292, ENSMUSG00000040712, ENSMUSG00000028266, ENSMUSG00000061436, ENSMUSG00000006456, ENSMUSG00000060601, ENSMUSG00000053483, ENSMUSG00000040964, ENSMUSG00000039910,…	390	288	13288	2.60271	0.0583248	0.00996581	0.168593
GOTERM_CC_FAT	GO:0070013~intracellular organelle lumen	52	8.37359	0.000222057	ENSMUSG00000000134, ENSMUSG00000029614, ENSMUSG00000038967, ENSMUSG00000028809, ENSMUSG00000029715, ENSMUSG00000018537, ENSMUSG00000031681, ENSMUSG00000021967, ENSMUSG00000025920, ENSMUSG00000040964, ENSMUSG00000052293, ENSMUSG00000007817, ENSMUSG00000026833, ENSMUSG00000045248, ENSMUSG00000072872, ENSMUSG00000027490, ENSMUSG00000072115, ENSMUSG00000030802, ENSMUSG00000047371, ENSMUSG00000001910,…	341	1133	12504	1.68294	0.062998	0.0320114	0.295262
GOTERM_MF_FAT	GO:0046872~metal ion binding	146	23.5105	0.000207596	ENSMUSG00000021127, ENSMUSG00000009828, ENSMUSG00000029178, ENSMUSG00000025203, ENSMUSG00000066440, ENSMUSG00000022508, ENSMUSG00000038418, ENSMUSG00000020889, ENSMUSG00000001844, ENSMUSG00000055148, ENSMUSG00000025197, ENSMUSG00000024050, ENSMUSG00000059474, ENSMUSG00000030087, ENSMUSG00000073423, ENSMUSG00000034248, ENSMUSG00000025786, ENSMUSG00000027394, ENSMUSG00000072872, ENSMUSG00000055917,…	390	3850	13288	1.29207	0.101405	0.0151586	0.29977
GOTERM_CC_FAT	GO:0043233~organelle lumen	52	8.37359	0.00023578	ENSMUSG00000000134, ENSMUSG00000029614, ENSMUSG00000038967, ENSMUSG00000028809, ENSMUSG00000029715, ENSMUSG00000018537, ENSMUSG00000031681, ENSMUSG00000021967, ENSMUSG00000025920, ENSMUSG00000040964, ENSMUSG00000052293, ENSMUSG00000007817, ENSMUSG00000026833, ENSMUSG00000045248, ENSMUSG00000072872, ENSMUSG00000027490, ENSMUSG00000072115, ENSMUSG00000030802, ENSMUSG00000047371, ENSMUSG00000001910,…	341	1136	12504	1.67849	0.0667589	0.0227674	0.313484
GOTERM_BP_FAT	GO:0008654~phospholipid biosynthetic process	11	1.77134	0.000218904	ENSMUSG00000010607, ENSMUSG00000017721, ENSMUSG00000023452, ENSMUSG00000070644, ENSMUSG00000030682, ENSMUSG00000079469, ENSMUSG00000030990, ENSMUSG00000034254, ENSMUSG00000026922, ENSMUSG00000000301, ENSMUSG00000057342	418	83	13588	4.30818	0.321844	0.0213455	0.370449
GOTERM_CC_FAT	GO:0031974~membrane-enclosed lumen	53	8.53462	0.000281636	ENSMUSG00000000134, ENSMUSG00000029614, ENSMUSG00000038967, ENSMUSG00000028809, ENSMUSG00000029715, ENSMUSG00000018537, ENSMUSG00000031681, ENSMUSG00000021967, ENSMUSG00000025920, ENSMUSG00000040964, ENSMUSG00000052293, ENSMUSG00000007817, ENSMUSG00000026833, ENSMUSG00000045248, ENSMUSG00000072872, ENSMUSG00000027490, ENSMUSG00000072115, ENSMUSG00000030802, ENSMUSG00000047371, ENSMUSG00000001910,…	341	1174	12504	1.6554	0.079217	0.0204213	0.374345
GOTERM_CC_FAT	GO:0031090~organelle membrane	40	6.44122	0.000343505	ENSMUSG00000005674, ENSMUSG00000018677, ENSMUSG00000025733, ENSMUSG00000064345, ENSMUSG00000028538, ENSMUSG00000017721, ENSMUSG00000064341, ENSMUSG00000064367, ENSMUSG00000035392, ENSMUSG00000071657, ENSMUSG00000057789, ENSMUSG00000024981, ENSMUSG00000030990, ENSMUSG00000018559, ENSMUSG00000010936, ENSMUSG00000034248, ENSMUSG00000028581, ENSMUSG00000026925, ENSMUSG00000026811, ENSMUSG00000025270,…	341	809	12504	1.81303	0.0957633	0.0199315	0.456407
GOTERM_MF_FAT	GO:0043169~cation binding	146	23.5105	0.00032349	ENSMUSG00000021127, ENSMUSG00000009828, ENSMUSG00000029178, ENSMUSG00000025203, ENSMUSG00000066440, ENSMUSG00000022508, ENSMUSG00000038418, ENSMUSG00000020889, ENSMUSG00000001844, ENSMUSG00000055148, ENSMUSG00000025197, ENSMUSG00000024050, ENSMUSG00000059474, ENSMUSG00000030087, ENSMUSG00000073423, ENSMUSG00000034248, ENSMUSG00000025786, ENSMUSG00000027394, ENSMUSG00000072872, ENSMUSG00000055917,…	390	3885	13288	1.28043	0.153482	0.0206126	0.466758
GOTERM_CC_FAT	GO:0044451~nucleoplasm part	29	4.66989	0.000360958	ENSMUSG00000034120, ENSMUSG00000000134, ENSMUSG00000017950, ENSMUSG00000078765, ENSMUSG00000028809, ENSMUSG00000028266, ENSMUSG00000058886, ENSMUSG00000032897, ENSMUSG00000061436, ENSMUSG00000018537, ENSMUSG00000039117, ENSMUSG00000031681, ENSMUSG00000040964, ENSMUSG00000046876, ENSMUSG00000026077, ENSMUSG00000052293, ENSMUSG00000008855, ENSMUSG00000024985, ENSMUSG00000061650, ENSMUSG00000007817,…	341	513	12504	2.07289	0.100377	0.0174755	0.479545
GOTERM_CC_FAT	GO:0005740~mitochondrial envelope	24	3.86473	0.000439593	ENSMUSG00000005674, ENSMUSG00000018677, ENSMUSG00000064345, ENSMUSG00000025733, ENSMUSG00000064341, ENSMUSG00000064367, ENSMUSG00000024981, ENSMUSG00000057789, ENSMUSG00000034248, ENSMUSG00000025270, ENSMUSG00000054630, ENSMUSG00000064351, ENSMUSG00000064370, ENSMUSG00000078713, ENSMUSG00000000301, ENSMUSG00000064354, ENSMUSG00000064356, ENSMUSG00000064357, ENSMUSG00000027875, ENSMUSG00000064358,…	341	391	12504	2.25076	0.120876	0.0182358	0.583732
INTERPRO	IPR000626:Ubiquitin	8	1.28824	0.000446883	ENSMUSG00000055720, ENSMUSG00000025171, ENSMUSG00000035621, ENSMUSG00000041827, ENSMUSG00000003813, ENSMUSG00000028958, ENSMUSG00000008604, ENSMUSG00000055553	530	47	17763	5.7047	0.309953	0.0885777	0.687067
GOTERM_MF_FAT	GO:0043167~ion binding	146	23.5105	0.000587036	ENSMUSG00000021127, ENSMUSG00000009828, ENSMUSG00000029178, ENSMUSG00000025203, ENSMUSG00000066440, ENSMUSG00000022508, ENSMUSG00000038418, ENSMUSG00000020889, ENSMUSG00000001844, ENSMUSG00000055148, ENSMUSG00000025197, ENSMUSG00000024050, ENSMUSG00000059474, ENSMUSG00000030087, ENSMUSG00000073423, ENSMUSG00000034248, ENSMUSG00000025786, ENSMUSG00000027394, ENSMUSG00000072872, ENSMUSG00000055917,…	390	3934	13288	1.26448	0.260967	0.0330431	0.845524
GOTERM_BP_FAT	GO:0001568~blood vessel development	19	3.05958	0.000545638	ENSMUSG00000009569, ENSMUSG00000042677, ENSMUSG00000021127, ENSMUSG00000007817, ENSMUSG00000058454, ENSMUSG00000072115, ENSMUSG00000030123, ENSMUSG00000028868, ENSMUSG00000015605, ENSMUSG00000057342, ENSMUSG00000018604, ENSMUSG00000008398, ENSMUSG00000039844, ENSMUSG00000038742, ENSMUSG00000026814, ENSMUSG00000057789, ENSMUSG00000039910, ENSMUSG00000046470, ENSMUSG00000026921	418	244	13588	2.5313	0.620244	0.0496826	0.920973
GOTERM_CC_FAT	GO:0005783~endoplasmic reticulum	40	6.44122	0.000697526	ENSMUSG00000050106, ENSMUSG00000058454, ENSMUSG00000024875, ENSMUSG00000025203, ENSMUSG00000007777, ENSMUSG00000037071, ENSMUSG00000002778, ENSMUSG00000027983, ENSMUSG00000023206, ENSMUSG00000032349, ENSMUSG00000017721, ENSMUSG00000010607, ENSMUSG00000042429, ENSMUSG00000045294, ENSMUSG00000025920, ENSMUSG00000071657, ENSMUSG00000057789, ENSMUSG00000036835, ENSMUSG00000024981, ENSMUSG00000030682,…	341	838	12504	1.75029	0.184902	0.025232	0.92477
GOTERM_BP_FAT	GO:0046486~glycerolipid metabolic process	13	2.0934	0.000610909	ENSMUSG00000026925, ENSMUSG00000034731, ENSMUSG00000030228, ENSMUSG00000021340, ENSMUSG00000072115, ENSMUSG00000079469, ENSMUSG00000000301, ENSMUSG00000017721, ENSMUSG00000010607, ENSMUSG00000045294, ENSMUSG00000070644, ENSMUSG00000030990, ENSMUSG00000032081	418	129	13588	3.27592	0.661788	0.0527613	1.03061
GOTERM_CC_FAT	GO:0005761~mitochondrial ribosome	7	1.12721	0.00077832	ENSMUSG00000021607, ENSMUSG00000034880, ENSMUSG00000010406, ENSMUSG00000021967, ENSMUSG00000026087, ENSMUSG00000061474, ENSMUSG00000001445	341	41	12504	6.2605	0.203984	0.0250299	1.03137
GOTERM_CC_FAT	GO:0000313~organellar ribosome	7	1.12721	0.00077832	ENSMUSG00000021607, ENSMUSG00000034880, ENSMUSG00000010406, ENSMUSG00000021967, ENSMUSG00000026087, ENSMUSG00000061474, ENSMUSG00000001445	341	41	12504	6.2605	0.203984	0.0250299	1.03137
GOTERM_CC_FAT	GO:0030529~ribonucleoprotein complex	26	4.1868	0.000845092	ENSMUSG00000007892, ENSMUSG00000034120, ENSMUSG00000021607, ENSMUSG00000056851, ENSMUSG00000047215, ENSMUSG00000029614, ENSMUSG00000034880, ENSMUSG00000026511, ENSMUSG00000078765, ENSMUSG00000028809, ENSMUSG00000024949, ENSMUSG00000001445, ENSMUSG00000063480, ENSMUSG00000000948, ENSMUSG00000021967, ENSMUSG00000068856, ENSMUSG00000061479, ENSMUSG00000061474, ENSMUSG00000062981, ENSMUSG00000010406,…	341	462	12504	2.0636	0.219419	0.0244674	1.1194
GOTERM_BP_FAT	GO:0001944~vasculature development	19	3.05958	0.000724157	ENSMUSG00000009569, ENSMUSG00000042677, ENSMUSG00000021127, ENSMUSG00000007817, ENSMUSG00000058454, ENSMUSG00000072115, ENSMUSG00000030123, ENSMUSG00000028868, ENSMUSG00000015605, ENSMUSG00000057342, ENSMUSG00000018604, ENSMUSG00000008398, ENSMUSG00000039844, ENSMUSG00000038742, ENSMUSG00000026814, ENSMUSG00000057789, ENSMUSG00000039910, ENSMUSG00000046470, ENSMUSG00000026921	418	250	13588	2.47055	0.723382	0.0593613	1.22056
GOTERM_CC_FAT	GO:0005739~mitochondrion	55	8.85668	0.00148743	ENSMUSG00000018677, ENSMUSG00000023452, ENSMUSG00000020935, ENSMUSG00000038967, ENSMUSG00000029518, ENSMUSG00000064345, ENSMUSG00000064341, ENSMUSG00000021967, ENSMUSG00000021217, ENSMUSG00000057666, ENSMUSG00000034248, ENSMUSG00000023020, ENSMUSG00000064370, ENSMUSG00000030802, ENSMUSG00000078572, ENSMUSG00000027875, ENSMUSG00000013701, ENSMUSG00000038342, ENSMUSG00000002083, ENSMUSG00000022412,…	341	1322	12504	1.52555	0.353474	0.0388735	1.96246
GOTERM_CC_FAT	GO:0031967~organelle envelope	28	4.50886	0.00169434	ENSMUSG00000005674, ENSMUSG00000018677, ENSMUSG00000064345, ENSMUSG00000025733, ENSMUSG00000064341, ENSMUSG00000064367, ENSMUSG00000024981, ENSMUSG00000057789, ENSMUSG00000018559, ENSMUSG00000034248, ENSMUSG00000025270, ENSMUSG00000054630, ENSMUSG00000064351, ENSMUSG00000064370, ENSMUSG00000078713, ENSMUSG00000053293, ENSMUSG00000033220, ENSMUSG00000000301, ENSMUSG00000064354, ENSMUSG00000064356,…	341	540	12504	1.90134	0.391564	0.0405598	2.23261
GOTERM_CC_FAT	GO:0031975~envelope	28	4.50886	0.00179538	ENSMUSG00000005674, ENSMUSG00000018677, ENSMUSG00000064345, ENSMUSG00000025733, ENSMUSG00000064341, ENSMUSG00000064367, ENSMUSG00000024981, ENSMUSG00000057789, ENSMUSG00000018559, ENSMUSG00000034248, ENSMUSG00000025270, ENSMUSG00000054630, ENSMUSG00000064351, ENSMUSG00000064370, ENSMUSG00000078713, ENSMUSG00000053293, ENSMUSG00000033220, ENSMUSG00000000301, ENSMUSG00000064354, ENSMUSG00000064356,…	341	542	12504	1.89432	0.409343	0.0396923	2.36429
GOTERM_BP_FAT	GO:0022904~respiratory electron transport chain	6	0.966184	0.00145721	ENSMUSG00000064356, ENSMUSG00000064357, ENSMUSG00000064358, ENSMUSG00000064367, ENSMUSG00000064370, ENSMUSG00000064345, ENSMUSG00000064363, ENSMUSG00000064354	418	28	13588	6.96582	0.924752	0.110939	2.44181
GOTERM_CC_FAT	GO:0005654~nucleoplasm	30	4.83092	0.00189562	ENSMUSG00000034120, ENSMUSG00000000134, ENSMUSG00000017950, ENSMUSG00000078765, ENSMUSG00000028809, ENSMUSG00000028266, ENSMUSG00000058886, ENSMUSG00000032897, ENSMUSG00000061436, ENSMUSG00000018537, ENSMUSG00000039117, ENSMUSG00000031681, ENSMUSG00000040964, ENSMUSG00000046876, ENSMUSG00000026077, ENSMUSG00000052293, ENSMUSG00000008855, ENSMUSG00000024985, ENSMUSG00000061650, ENSMUSG00000007817,…	341	599	12504	1.83649	0.426469	0.0389321	2.49475
GOTERM_BP_FAT	GO:0006644~phospholipid metabolic process	14	2.25443	0.00155342	ENSMUSG00000026925, ENSMUSG00000023452, ENSMUSG00000030228, ENSMUSG00000021340, ENSMUSG00000079469, ENSMUSG00000000301, ENSMUSG00000057342, ENSMUSG00000017721, ENSMUSG00000010607, ENSMUSG00000070644, ENSMUSG00000030682, ENSMUSG00000030990, ENSMUSG00000034254, ENSMUSG00000026922	418	163	13588	2.79203	0.936575	0.112999	2.60104
GOTERM_BP_FAT	GO:0007569~cell aging	6	0.966184	0.00171702	ENSMUSG00000007817, ENSMUSG00000018604, ENSMUSG00000026814, ENSMUSG00000033307, ENSMUSG00000041577, ENSMUSG00000000282	418	29	13588	6.72562	0.952576	0.119289	2.87125
GOTERM_CC_FAT	GO:0031966~mitochondrial membrane	21	3.38164	0.00258039	ENSMUSG00000005674, ENSMUSG00000018677, ENSMUSG00000025270, ENSMUSG00000054630, ENSMUSG00000064351, ENSMUSG00000064370, ENSMUSG00000025733, ENSMUSG00000064345, ENSMUSG00000078713, ENSMUSG00000064354, ENSMUSG00000064356, ENSMUSG00000064341, ENSMUSG00000064357, ENSMUSG00000064358, ENSMUSG00000027875, ENSMUSG00000064367, ENSMUSG00000013701, ENSMUSG00000038342, ENSMUSG00000050144, ENSMUSG00000024981,…	341	368	12504	2.0925	0.530944	0.0492164	3.38171
GOTERM_BP_FAT	GO:0045333~cellular respiration	8	1.28824	0.00210003	ENSMUSG00000064356, ENSMUSG00000064357, ENSMUSG00000064358, ENSMUSG00000064367, ENSMUSG00000031902, ENSMUSG00000064351, ENSMUSG00000064370, ENSMUSG00000064345, ENSMUSG00000064363, ENSMUSG00000064354	418	59	13588	4.40775	0.975992	0.138581	3.50104
INTERPRO	IPR001750:NADH:ubiquinone/plastoquinone oxidoreductase	3	0.483092	0.00260331	ENSMUSG00000064367, ENSMUSG00000064345, ENSMUSG00000064363	530	3	17763	33.5151	0.885085	0.351253	3.94089
GOTERM_BP_FAT	GO:0016125~sterol metabolic process	9	1.44928	0.00243333	ENSMUSG00000022463, ENSMUSG00000021252, ENSMUSG00000027875, ENSMUSG00000058454, ENSMUSG00000029556, ENSMUSG00000045294, ENSMUSG00000023963, ENSMUSG00000032245, ENSMUSG00000032081	418	77	13588	3.79954	0.986727	0.153149	4.04599
GOTERM_MF_FAT	GO:0003707~steroid hormone receptor activity	7	1.12721	0.00292299	ENSMUSG00000037992, ENSMUSG00000015846, ENSMUSG00000060601, ENSMUSG00000017950, ENSMUSG00000032238, ENSMUSG00000037583, ENSMUSG00000020889	390	49	13288	4.8674	0.778547	0.139941	4.14457
GOTERM_BP_FAT	GO:0007568~aging	8	1.28824	0.00254865	ENSMUSG00000007817, ENSMUSG00000018604, ENSMUSG00000026814, ENSMUSG00000034254, ENSMUSG00000033307, ENSMUSG00000041577, ENSMUSG00000000282, ENSMUSG00000005089	418	61	13588	4.26324	0.989188	0.154367	4.23385
INTERPRO	IPR001723:Steroid hormone receptor	7	1.12721	0.00287911	ENSMUSG00000037992, ENSMUSG00000015846, ENSMUSG00000060601, ENSMUSG00000017950, ENSMUSG00000032238, ENSMUSG00000037583, ENSMUSG00000020889	530	48	17763	4.88762	0.908655	0.32891	4.34979
INTERPRO	IPR008946:Nuclear hormone receptor, ligand-binding	7	1.12721	0.00319993	ENSMUSG00000037992, ENSMUSG00000015846, ENSMUSG00000060601, ENSMUSG00000017950, ENSMUSG00000032238, ENSMUSG00000037583, ENSMUSG00000020889	530	49	17763	4.78787	0.930066	0.316159	4.82337
INTERPRO	IPR000536:Nuclear hormone receptor, ligand-binding, core	7	1.12721	0.00319993	ENSMUSG00000037992, ENSMUSG00000015846, ENSMUSG00000060601, ENSMUSG00000017950, ENSMUSG00000032238, ENSMUSG00000037583, ENSMUSG00000020889	530	49	17763	4.78787	0.930066	0.316159	4.82337
GOTERM_BP_FAT	GO:0019637~organophosphate metabolic process	14	2.25443	0.00305969	ENSMUSG00000026925, ENSMUSG00000023452, ENSMUSG00000030228, ENSMUSG00000021340, ENSMUSG00000079469, ENSMUSG00000000301, ENSMUSG00000057342, ENSMUSG00000017721, ENSMUSG00000010607, ENSMUSG00000070644, ENSMUSG00000030682, ENSMUSG00000030990, ENSMUSG00000034254, ENSMUSG00000026922	418	176	13588	2.5858	0.995644	0.176466	5.06225
KEGG_PATHWAY	mmu00564:Glycerophospholipid metabolism	8	1.28824	0.00444512	ENSMUSG00000040479, ENSMUSG00000023452, ENSMUSG00000034731, ENSMUSG00000030682, ENSMUSG00000042632, ENSMUSG00000034254, ENSMUSG00000026922, ENSMUSG00000000301	179	67	5738	3.82757	0.47116	0.47116	5.13927
GOTERM_BP_FAT	GO:0048514~blood vessel morphogenesis	15	2.41546	0.00322034	ENSMUSG00000009569, ENSMUSG00000042677, ENSMUSG00000021127, ENSMUSG00000007817, ENSMUSG00000072115, ENSMUSG00000030123, ENSMUSG00000028868, ENSMUSG00000015605, ENSMUSG00000008398, ENSMUSG00000038742, ENSMUSG00000026814, ENSMUSG00000057789, ENSMUSG00000039910, ENSMUSG00000046470, ENSMUSG00000026921	418	198	13588	2.46266	0.996727	0.179067	5.32125
GOTERM_BP_FAT	GO:0007242~intracellular signaling cascade	44	7.08535	0.00341845	ENSMUSG00000020091, ENSMUSG00000009828, ENSMUSG00000029518, ENSMUSG00000022508, ENSMUSG00000028868, ENSMUSG00000033307, ENSMUSG00000042594, ENSMUSG00000025733, ENSMUSG00000022102, ENSMUSG00000025422, ENSMUSG00000042429, ENSMUSG00000061436, ENSMUSG00000037003, ENSMUSG00000029528, ENSMUSG00000015846, ENSMUSG00000031681, ENSMUSG00000044147, ENSMUSG00000039844, ENSMUSG00000040964, ENSMUSG00000030990,…	418	915	13588	1.56319	0.9977	0.183306	5.63976
GOTERM_BP_FAT	GO:0008202~steroid metabolic process	13	2.0934	0.00404927	ENSMUSG00000022463, ENSMUSG00000021252, ENSMUSG00000027875, ENSMUSG00000038641, ENSMUSG00000058454, ENSMUSG00000020435, ENSMUSG00000029556, ENSMUSG00000045294, ENSMUSG00000023963, ENSMUSG00000032245, ENSMUSG00000021594, ENSMUSG00000032081, ENSMUSG00000037606	418	161	13588	2.6248	0.999252	0.207207	6.64721
GOTERM_CC_FAT	GO:0031981~nuclear lumen	38	6.11916	0.00560852	ENSMUSG00000034120, ENSMUSG00000000134, ENSMUSG00000042675, ENSMUSG00000029614, ENSMUSG00000017950, ENSMUSG00000035621, ENSMUSG00000078765, ENSMUSG00000028809, ENSMUSG00000028266, ENSMUSG00000058886, ENSMUSG00000032897, ENSMUSG00000063480, ENSMUSG00000061436, ENSMUSG00000029715, ENSMUSG00000018537, ENSMUSG00000039117, ENSMUSG00000031681, ENSMUSG00000026077, ENSMUSG00000040964, ENSMUSG00000046876,…	341	883	12504	1.57804	0.807551	0.0978686	7.21517
GOTERM_MF_FAT	GO:0004879~ligand-dependent nuclear receptor activity	7	1.12721	0.00572062	ENSMUSG00000037992, ENSMUSG00000015846, ENSMUSG00000060601, ENSMUSG00000017950, ENSMUSG00000032238, ENSMUSG00000037583, ENSMUSG00000020889	390	56	13288	4.25897	0.947899	0.235549	7.96112
GOTERM_CC_FAT	GO:0005840~ribosome	13	2.0934	0.00624631	ENSMUSG00000007892, ENSMUSG00000021607, ENSMUSG00000047215, ENSMUSG00000029614, ENSMUSG00000034880, ENSMUSG00000062981, ENSMUSG00000001445, ENSMUSG00000010406, ENSMUSG00000021967, ENSMUSG00000026087, ENSMUSG00000057863, ENSMUSG00000055553, ENSMUSG00000061474	341	192	12504	2.48277	0.840531	0.102368	8.00443
GOTERM_CC_FAT	GO:0005681~spliceosome	10	1.61031	0.00670768	ENSMUSG00000034120, ENSMUSG00000063480, ENSMUSG00000009076, ENSMUSG00000078765, ENSMUSG00000068856, ENSMUSG00000028809, ENSMUSG00000044709, ENSMUSG00000061479, ENSMUSG00000024949, ENSMUSG00000020211	341	124	12504	2.95715	0.860818	0.103766	8.57151
GOTERM_BP_FAT	GO:0045792~negative regulation of cell size	7	1.12721	0.00546864	ENSMUSG00000002083, ENSMUSG00000004798, ENSMUSG00000056201, ENSMUSG00000030168, ENSMUSG00000056493, ENSMUSG00000028755, ENSMUSG00000062762	418	53	13588	4.2934	0.99994	0.262139	8.87711
GOTERM_CC_FAT	GO:0005743~mitochondrial inner membrane	17	2.73752	0.00703526	ENSMUSG00000018677, ENSMUSG00000025270, ENSMUSG00000054630, ENSMUSG00000064351, ENSMUSG00000064370, ENSMUSG00000064345, ENSMUSG00000025733, ENSMUSG00000064354, ENSMUSG00000064356, ENSMUSG00000064341, ENSMUSG00000064357, ENSMUSG00000064358, ENSMUSG00000027875, ENSMUSG00000064367, ENSMUSG00000013701, ENSMUSG00000050144, ENSMUSG00000024981, ENSMUSG00000033685, ENSMUSG00000034248	341	296	12504	2.10597	0.87364	0.103157	8.97217
GOTERM_BP_FAT	GO:0008203~cholesterol metabolic process	8	1.28824	0.00553751	ENSMUSG00000022463, ENSMUSG00000027875, ENSMUSG00000058454, ENSMUSG00000029556, ENSMUSG00000045294, ENSMUSG00000023963, ENSMUSG00000032245, ENSMUSG00000032081	418	70	13588	3.71511	0.999947	0.258077	8.98402
GOTERM_BP_FAT	GO:0006650~glycerophospholipid metabolic process	9	1.44928	0.00555754	ENSMUSG00000010607, ENSMUSG00000017721, ENSMUSG00000026925, ENSMUSG00000030228, ENSMUSG00000021340, ENSMUSG00000070644, ENSMUSG00000079469, ENSMUSG00000030990, ENSMUSG00000000301	418	88	13588	3.3246	0.999949	0.252321	9.0151
GOTERM_MF_FAT	GO:0003712~transcription cofactor activity	13	2.0934	0.00674502	ENSMUSG00000003575, ENSMUSG00000004263, ENSMUSG00000009569, ENSMUSG00000061436, ENSMUSG00000041164, ENSMUSG00000006456, ENSMUSG00000072872, ENSMUSG00000053483, ENSMUSG00000054452, ENSMUSG00000042292, ENSMUSG00000046711, ENSMUSG00000039910, ENSMUSG00000008855	390	180	13288	2.46074	0.96936	0.252076	9.32288
GOTERM_BP_FAT	GO:0006694~steroid biosynthetic process	8	1.28824	0.00598539	ENSMUSG00000021252, ENSMUSG00000027875, ENSMUSG00000038641, ENSMUSG00000058454, ENSMUSG00000029556, ENSMUSG00000045294, ENSMUSG00000023963, ENSMUSG00000021594	418	71	13588	3.66278	0.999976	0.26235	9.67643
KEGG_PATHWAY	mmu01040:Biosynthesis of unsaturated fatty acids	5	0.805153	0.008989	ENSMUSG00000046404, ENSMUSG00000025203, ENSMUSG00000037071, ENSMUSG00000021228, ENSMUSG00000032349	179	27	5738	5.93627	0.72507	0.475662	10.1418
GOTERM_BP_FAT	GO:0035239~tube morphogenesis	13	2.0934	0.00651836	ENSMUSG00000038593, ENSMUSG00000020053, ENSMUSG00000028266, ENSMUSG00000030123, ENSMUSG00000015605, ENSMUSG00000016028, ENSMUSG00000029528, ENSMUSG00000018604, ENSMUSG00000026814, ENSMUSG00000008999, ENSMUSG00000056201, ENSMUSG00000032796, ENSMUSG00000005087	418	171	13588	2.47131	0.999991	0.275492	10.4939
GOTERM_CC_FAT	GO:0070469~respiratory chain	7	1.12721	0.00830113	ENSMUSG00000064341, ENSMUSG00000064367, ENSMUSG00000064351, ENSMUSG00000064370, ENSMUSG00000064345, ENSMUSG00000064363, ENSMUSG00000064354	341	65	12504	3.94893	0.913047	0.114957	10.5052
INTERPRO	IPR000608:Ubiquitin-conjugating enzyme, E2	6	0.966184	0.00788192	ENSMUSG00000005575, ENSMUSG00000019927, ENSMUSG00000078578, ENSMUSG00000036241, ENSMUSG00000015120, ENSMUSG00000034343	530	42	17763	4.78787	0.998595	0.560004	11.49
KEGG_PATHWAY	mmu04666:Fc gamma R-mediated phagocytosis	9	1.44928	0.0107058	ENSMUSG00000026755, ENSMUSG00000031834, ENSMUSG00000044147, ENSMUSG00000029684, ENSMUSG00000056201, ENSMUSG00000042632, ENSMUSG00000028868, ENSMUSG00000033220, ENSMUSG00000057342	179	98	5738	2.94391	0.785442	0.401338	11.9681
GOTERM_BP_FAT	GO:0048754~branching morphogenesis of a tube	9	1.44928	0.00771889	ENSMUSG00000029528, ENSMUSG00000018604, ENSMUSG00000020053, ENSMUSG00000026814, ENSMUSG00000008999, ENSMUSG00000030123, ENSMUSG00000032796, ENSMUSG00000015605, ENSMUSG00000005087	418	93	13588	3.14586	0.999999	0.310318	12.3099
GOTERM_MF_FAT	GO:0016564~transcription repressor activity	14	2.25443	0.00925675	ENSMUSG00000004263, ENSMUSG00000072872, ENSMUSG00000049295, ENSMUSG00000054452, ENSMUSG00000022508, ENSMUSG00000056493, ENSMUSG00000021366, ENSMUSG00000037992, ENSMUSG00000061436, ENSMUSG00000001910, ENSMUSG00000018604, ENSMUSG00000046876, ENSMUSG00000008855, ENSMUSG00000023991	390	211	13288	2.26069	0.991683	0.308172	12.5828
GOTERM_BP_FAT	GO:0045017~glycerolipid biosynthetic process	7	1.12721	0.0084856	ENSMUSG00000010607, ENSMUSG00000017721, ENSMUSG00000070644, ENSMUSG00000072115, ENSMUSG00000079469, ENSMUSG00000030990, ENSMUSG00000000301	418	58	13588	3.92328	1	0.328226	13.4515
GOTERM_CC_FAT	GO:0019866~organelle inner membrane	17	2.73752	0.0113235	ENSMUSG00000018677, ENSMUSG00000025270, ENSMUSG00000054630, ENSMUSG00000064351, ENSMUSG00000064370, ENSMUSG00000064345, ENSMUSG00000025733, ENSMUSG00000064354, ENSMUSG00000064356, ENSMUSG00000064341, ENSMUSG00000064357, ENSMUSG00000064358, ENSMUSG00000027875, ENSMUSG00000064367, ENSMUSG00000013701, ENSMUSG00000050144, ENSMUSG00000024981, ENSMUSG00000033685, ENSMUSG00000034248	341	312	12504	1.99797	0.964447	0.146911	14.0695
GOTERM_MF_FAT	GO:0019787~small conjugating protein ligase activity	10	1.61031	0.0111697	ENSMUSG00000036840, ENSMUSG00000005575, ENSMUSG00000018537, ENSMUSG00000019927, ENSMUSG00000078578, ENSMUSG00000020659, ENSMUSG00000036241, ENSMUSG00000015120, ENSMUSG00000034343, ENSMUSG00000024019	390	125	13288	2.72574	0.996926	0.338467	14.992
GOTERM_BP_FAT	GO:0001570~vasculogenesis	6	0.966184	0.0098056	ENSMUSG00000021127, ENSMUSG00000007817, ENSMUSG00000026814, ENSMUSG00000039910, ENSMUSG00000046470, ENSMUSG00000026921	418	43	13588	4.53589	1	0.361243	15.3842
INTERPRO	IPR013087:Zinc finger, C2H2-type/integrase, DNA-binding	26	4.1868	0.0115564	ENSMUSG00000018678, ENSMUSG00000028799, ENSMUSG00000027551, ENSMUSG00000029178, ENSMUSG00000049295, ENSMUSG00000051550, ENSMUSG00000072294, ENSMUSG00000040721, ENSMUSG00000048921, ENSMUSG00000022508, ENSMUSG00000038418, ENSMUSG00000021366, ENSMUSG00000031665, ENSMUSG00000055148, ENSMUSG00000074405, ENSMUSG00000024220, ENSMUSG00000030087, ENSMUSG00000046792, ENSMUSG00000033863, ENSMUSG00000045268,…	530	514	17763	1.69532	0.999935	0.657664	16.4134
GOTERM_CC_FAT	GO:0005759~mitochondrial matrix	11	1.77134	0.0136391	ENSMUSG00000021607, ENSMUSG00000038967, ENSMUSG00000034880, ENSMUSG00000010406, ENSMUSG00000025270, ENSMUSG00000021967, ENSMUSG00000026087, ENSMUSG00000030802, ENSMUSG00000061474, ENSMUSG00000001445, ENSMUSG00000079677	341	163	12504	2.47457	0.982114	0.167147	16.7109
GOTERM_CC_FAT	GO:0031980~mitochondrial lumen	11	1.77134	0.0136391	ENSMUSG00000021607, ENSMUSG00000038967, ENSMUSG00000034880, ENSMUSG00000010406, ENSMUSG00000025270, ENSMUSG00000021967, ENSMUSG00000026087, ENSMUSG00000030802, ENSMUSG00000061474, ENSMUSG00000001445, ENSMUSG00000079677	341	163	12504	2.47457	0.982114	0.167147	16.7109
GOTERM_MF_FAT	GO:0003735~structural constituent of ribosome	11	1.77134	0.0133849	ENSMUSG00000007892, ENSMUSG00000021607, ENSMUSG00000047215, ENSMUSG00000029614, ENSMUSG00000034880, ENSMUSG00000010406, ENSMUSG00000021967, ENSMUSG00000026087, ENSMUSG00000057863, ENSMUSG00000055553, ENSMUSG00000001445	390	151	13288	2.48205	0.999031	0.370387	17.7047
INTERPRO	IPR001628:Zinc finger, nuclear hormone receptor-type	6	0.966184	0.0125954	ENSMUSG00000037992, ENSMUSG00000015846, ENSMUSG00000060601, ENSMUSG00000017950, ENSMUSG00000032238, ENSMUSG00000020889	530	47	17763	4.27852	0.999973	0.650782	17.7584
GOTERM_CC_FAT	GO:0016604~nuclear body	10	1.61031	0.0154972	ENSMUSG00000034120, ENSMUSG00000061436, ENSMUSG00000007817, ENSMUSG00000001910, ENSMUSG00000018537, ENSMUSG00000070002, ENSMUSG00000078765, ENSMUSG00000028809, ENSMUSG00000044709, ENSMUSG00000008855	341	142	12504	2.5823	0.989706	0.180423	18.776
GOTERM_BP_FAT	GO:0030384~phosphoinositide metabolic process	7	1.12721	0.0125424	ENSMUSG00000010607, ENSMUSG00000017721, ENSMUSG00000026925, ENSMUSG00000030228, ENSMUSG00000021340, ENSMUSG00000079469, ENSMUSG00000030990	418	63	13588	3.61191	1	0.42866	19.2626
GOTERM_BP_FAT	GO:0046474~glycerophospholipid biosynthetic process	6	0.966184	0.0129608	ENSMUSG00000010607, ENSMUSG00000017721, ENSMUSG00000070644, ENSMUSG00000079469, ENSMUSG00000030990, ENSMUSG00000000301	418	46	13588	4.24007	1	0.431333	19.8407
GOTERM_BP_FAT	GO:0007264~small GTPase mediated signal transduction	16	2.57649	0.0136237	ENSMUSG00000035711, ENSMUSG00000054855, ENSMUSG00000022508, ENSMUSG00000029518, ENSMUSG00000028868, ENSMUSG00000025733, ENSMUSG00000033220, ENSMUSG00000022102, ENSMUSG00000025422, ENSMUSG00000002489, ENSMUSG00000039844, ENSMUSG00000044147, ENSMUSG00000026426, ENSMUSG00000016637, ENSMUSG00000000149, ENSMUSG00000073982	418	258	13588	2.01595	1	0.439762	20.7484
GOTERM_BP_FAT	GO:0030308~negative regulation of cell growth	6	0.966184	0.0141487	ENSMUSG00000002083, ENSMUSG00000004798, ENSMUSG00000030168, ENSMUSG00000056493, ENSMUSG00000028755, ENSMUSG00000062762	418	47	13588	4.14985	1	0.444498	21.4604
INTERPRO	IPR016135:Ubiquitin-conjugating enzyme/RWD-like	6	0.966184	0.0161851	ENSMUSG00000005575, ENSMUSG00000019927, ENSMUSG00000078578, ENSMUSG00000036241, ENSMUSG00000015120, ENSMUSG00000034343	530	50	17763	4.02181	0.999999	0.708067	22.2511
GOTERM_CC_FAT	GO:0005925~focal adhesion	6	0.966184	0.0190495	ENSMUSG00000037003, ENSMUSG00000029528, ENSMUSG00000021262, ENSMUSG00000034664, ENSMUSG00000029860, ENSMUSG00000031216	341	57	12504	3.85985	0.996431	0.209276	22.5927
GOTERM_BP_FAT	GO:0048729~tissue morphogenesis	15	2.41546	0.0153365	ENSMUSG00000038593, ENSMUSG00000020053, ENSMUSG00000028266, ENSMUSG00000030123, ENSMUSG00000022587, ENSMUSG00000038415, ENSMUSG00000016028, ENSMUSG00000018604, ENSMUSG00000015846, ENSMUSG00000029556, ENSMUSG00000031681, ENSMUSG00000008999, ENSMUSG00000056201, ENSMUSG00000032796, ENSMUSG00000005087	418	238	13588	2.04877	1	0.463737	23.0493
GOTERM_BP_FAT	GO:0006505~GPI anchor metabolic process	5	0.805153	0.0159386	ENSMUSG00000010607, ENSMUSG00000017721, ENSMUSG00000021340, ENSMUSG00000079469, ENSMUSG00000030990	418	32	13588	5.07925	1	0.469215	23.8432
GOTERM_CC_FAT	GO:0005768~endosome	14	2.25443	0.0204869	ENSMUSG00000026832, ENSMUSG00000028062, ENSMUSG00000034731, ENSMUSG00000018774, ENSMUSG00000028868, ENSMUSG00000019818, ENSMUSG00000040188, ENSMUSG00000025422, ENSMUSG00000044147, ENSMUSG00000014550, ENSMUSG00000048832, ENSMUSG00000026426, ENSMUSG00000066278, ENSMUSG00000010936	341	252	12504	2.03715	0.997677	0.215415	24.0894
INTERPRO	IPR000324:Vitamin D receptor	4	0.644122	0.0178419	ENSMUSG00000015846, ENSMUSG00000060601, ENSMUSG00000017950, ENSMUSG00000020889	530	19	17763	7.05581	1	0.712119	24.2463
INTERPRO	IPR003604:Zinc finger, U1-type	4	0.644122	0.0178419	ENSMUSG00000040721, ENSMUSG00000000552, ENSMUSG00000020211, ENSMUSG00000027016	530	19	17763	7.05581	1	0.712119	24.2463
INTERPRO	IPR003124:Actin-binding WH2	4	0.644122	0.0178419	ENSMUSG00000038013, ENSMUSG00000029684, ENSMUSG00000028868, ENSMUSG00000075284	530	19	17763	7.05581	1	0.712119	24.2463
GOTERM_CC_FAT	GO:0015934~large ribosomal subunit	5	0.805153	0.0208959	ENSMUSG00000021607, ENSMUSG00000047215, ENSMUSG00000034880, ENSMUSG00000010406, ENSMUSG00000001445	341	39	12504	4.70111	0.997945	0.211778	24.5104
GOTERM_BP_FAT	GO:0035295~tube development	16	2.57649	0.0164792	ENSMUSG00000058454, ENSMUSG00000038593, ENSMUSG00000020053, ENSMUSG00000028266, ENSMUSG00000030123, ENSMUSG00000015605, ENSMUSG00000031665, ENSMUSG00000037992, ENSMUSG00000016028, ENSMUSG00000029528, ENSMUSG00000018604, ENSMUSG00000026814, ENSMUSG00000008999, ENSMUSG00000056201, ENSMUSG00000032796, ENSMUSG00000005087	418	264	13588	1.97013	1	0.473139	24.5492
GOTERM_BP_FAT	GO:0042773~ATP synthesis coupled electron transport	4	0.644122	0.0166194	ENSMUSG00000064356, ENSMUSG00000064357, ENSMUSG00000064358, ENSMUSG00000064367, ENSMUSG00000064345, ENSMUSG00000064363	418	18	13588	7.22382	1	0.468772	24.7313
GOTERM_BP_FAT	GO:0006699~bile acid biosynthetic process	3	0.483092	0.0178125	ENSMUSG00000038641, ENSMUSG00000029556, ENSMUSG00000023963	418	7	13588	13.9316	1	0.485342	26.2645
GOTERM_BP_FAT	GO:0001701~in utero embryonic development	16	2.57649	0.0180651	ENSMUSG00000009569, ENSMUSG00000007817, ENSMUSG00000038593, ENSMUSG00000028639, ENSMUSG00000022587, ENSMUSG00000015605, ENSMUSG00000069919, ENSMUSG00000018604, ENSMUSG00000018537, ENSMUSG00000029556, ENSMUSG00000004931, ENSMUSG00000070644, ENSMUSG00000070002, ENSMUSG00000039910, ENSMUSG00000022174, ENSMUSG00000000149, ENSMUSG00000069917	418	267	13588	1.948	1	0.483154	26.5854
GOTERM_BP_FAT	GO:0006916~anti-apoptosis	8	1.28824	0.0183991	ENSMUSG00000018604, ENSMUSG00000042292, ENSMUSG00000020053, ENSMUSG00000039910, ENSMUSG00000030847, ENSMUSG00000022174, ENSMUSG00000030990, ENSMUSG00000057342	418	88	13588	2.9552	1	0.48257	27.0076
GOTERM_CC_FAT	GO:0005762~mitochondrial large ribosomal subunit	4	0.644122	0.0235863	ENSMUSG00000021607, ENSMUSG00000034880, ENSMUSG00000010406, ENSMUSG00000001445	341	23	12504	6.37715	0.999082	0.228193	27.226
GOTERM_CC_FAT	GO:0000315~organellar large ribosomal subunit	4	0.644122	0.0235863	ENSMUSG00000021607, ENSMUSG00000034880, ENSMUSG00000010406, ENSMUSG00000001445	341	23	12504	6.37715	0.999082	0.228193	27.226
INTERPRO	IPR013088:Zinc finger, NHR/GATA-type	6	0.966184	0.0203978	ENSMUSG00000037992, ENSMUSG00000015846, ENSMUSG00000060601, ENSMUSG00000017950, ENSMUSG00000032238, ENSMUSG00000020889	530	53	17763	3.79416	1	0.731736	27.2305
GOTERM_BP_FAT	GO:0060548~negative regulation of cell death	15	2.41546	0.0192426	ENSMUSG00000020857, ENSMUSG00000020053, ENSMUSG00000042292, ENSMUSG00000022508, ENSMUSG00000030847, ENSMUSG00000020423, ENSMUSG00000057342, ENSMUSG00000042429, ENSMUSG00000061436, ENSMUSG00000018604, ENSMUSG00000018537, ENSMUSG00000039910, ENSMUSG00000022174, ENSMUSG00000030990, ENSMUSG00000068686	418	245	13588	1.99024	1	0.491283	28.0636
GOTERM_BP_FAT	GO:0007205~activation of protein kinase C activity by G-protein coupled receptor protein signaling pathway	4	0.644122	0.019295	ENSMUSG00000040479, ENSMUSG00000034731, ENSMUSG00000032578, ENSMUSG00000057342	418	19	13588	6.84362	1	0.485567	28.1287
GOTERM_MF_FAT	GO:0046983~protein dimerization activity	18	2.89855	0.022594	ENSMUSG00000000134, ENSMUSG00000003949, ENSMUSG00000017950, ENSMUSG00000034731, ENSMUSG00000032245, ENSMUSG00000042429, ENSMUSG00000016028, ENSMUSG00000029556, ENSMUSG00000030753, ENSMUSG00000024621, ENSMUSG00000071076, ENSMUSG00000024644, ENSMUSG00000026814, ENSMUSG00000034333, ENSMUSG00000030168, ENSMUSG00000041540, ENSMUSG00000028755, ENSMUSG00000023991	390	340	13288	1.8038	0.999992	0.520775	28.1409
GOTERM_CC_FAT	GO:0005924~cell-substrate adherens junction	6	0.966184	0.0248093	ENSMUSG00000037003, ENSMUSG00000029528, ENSMUSG00000021262, ENSMUSG00000034664, ENSMUSG00000029860, ENSMUSG00000031216	341	61	12504	3.60675	0.999364	0.231171	28.4304
GOTERM_BP_FAT	GO:0032147~activation of protein kinase activity	6	0.966184	0.0196261	ENSMUSG00000042429, ENSMUSG00000040479, ENSMUSG00000028062, ENSMUSG00000034731, ENSMUSG00000032578, ENSMUSG00000057342	418	51	13588	3.82437	1	0.48493	28.539
GOTERM_CC_FAT	GO:0005667~transcription factor complex	13	2.0934	0.0262053	ENSMUSG00000000134, ENSMUSG00000027490, ENSMUSG00000017950, ENSMUSG00000028266, ENSMUSG00000058886, ENSMUSG00000032897, ENSMUSG00000029556, ENSMUSG00000006456, ENSMUSG00000039117, ENSMUSG00000031681, ENSMUSG00000026077, ENSMUSG00000052293, ENSMUSG00000024985	341	234	12504	2.03715	0.999582	0.235318	29.7826
GOTERM_MF_FAT	GO:0016881~acid-amino acid ligase activity	11	1.77134	0.0242612	ENSMUSG00000036840, ENSMUSG00000005575, ENSMUSG00000027394, ENSMUSG00000018537, ENSMUSG00000019927, ENSMUSG00000078578, ENSMUSG00000020659, ENSMUSG00000036241, ENSMUSG00000015120, ENSMUSG00000034343, ENSMUSG00000024019	390	166	13288	2.25777	0.999997	0.524806	29.8931
GOTERM_CC_FAT	GO:0005829~cytosol	24	3.86473	0.0266013	ENSMUSG00000021127, ENSMUSG00000033819, ENSMUSG00000009828, ENSMUSG00000047215, ENSMUSG00000001229, ENSMUSG00000069919, ENSMUSG00000033022, ENSMUSG00000057789, ENSMUSG00000008855, ENSMUSG00000024985, ENSMUSG00000069917, ENSMUSG00000039431, ENSMUSG00000055980, ENSMUSG00000025271, ENSMUSG00000030228, ENSMUSG00000054855, ENSMUSG00000030847, ENSMUSG00000008604, ENSMUSG00000057342, ENSMUSG00000031834,…	341	549	12504	1.603	0.999629	0.231507	30.1619
GOTERM_BP_FAT	GO:0001525~angiogenesis	10	1.61031	0.0213708	ENSMUSG00000042677, ENSMUSG00000008398, ENSMUSG00000038742, ENSMUSG00000026814, ENSMUSG00000072115, ENSMUSG00000030123, ENSMUSG00000046470, ENSMUSG00000028868, ENSMUSG00000015605, ENSMUSG00000026921	418	133	13588	2.44415	1	0.508199	30.6645
GOTERM_BP_FAT	GO:0008380~RNA splicing	13	2.0934	0.0214428	ENSMUSG00000034120, ENSMUSG00000063480, ENSMUSG00000006498, ENSMUSG00000009076, ENSMUSG00000078765, ENSMUSG00000028809, ENSMUSG00000068856, ENSMUSG00000044709, ENSMUSG00000061479, ENSMUSG00000028639, ENSMUSG00000047656, ENSMUSG00000024949, ENSMUSG00000020211	418	201	13588	2.10245	1	0.502992	30.751
GOTERM_BP_FAT	GO:0022900~electron transport chain	9	1.44928	0.0219112	ENSMUSG00000064356, ENSMUSG00000064341, ENSMUSG00000064357, ENSMUSG00000064358, ENSMUSG00000064367, ENSMUSG00000064351, ENSMUSG00000064370, ENSMUSG00000064345, ENSMUSG00000064363, ENSMUSG00000064354, ENSMUSG00000079677	418	112	13588	2.61218	1	0.504323	31.3107
GOTERM_MF_FAT	GO:0016879~ligase activity, forming carbon-nitrogen bonds	12	1.93237	0.0267802	ENSMUSG00000036840, ENSMUSG00000005575, ENSMUSG00000027394, ENSMUSG00000018537, ENSMUSG00000019927, ENSMUSG00000078578, ENSMUSG00000020659, ENSMUSG00000036241, ENSMUSG00000015120, ENSMUSG00000076441, ENSMUSG00000034343, ENSMUSG00000024019	390	193	13288	2.11845	0.999999	0.54006	32.4653
GOTERM_MF_FAT	GO:0003713~transcription coactivator activity	8	1.28824	0.0273506	ENSMUSG00000003575, ENSMUSG00000009569, ENSMUSG00000041164, ENSMUSG00000006456, ENSMUSG00000053483, ENSMUSG00000042292, ENSMUSG00000046711, ENSMUSG00000039910	390	100	13288	2.72574	0.999999	0.528422	33.0354
INTERPRO	IPR000449:Ubiquitin-associated/translation elongation factor EF1B, N-terminal	5	0.805153	0.0258065	ENSMUSG00000055720, ENSMUSG00000003813, ENSMUSG00000022791, ENSMUSG00000008604, ENSMUSG00000042520	530	38	17763	4.40988	1	0.787762	33.1871
GOTERM_BP_FAT	GO:0031327~negative regulation of cellular biosynthetic process	22	3.54267	0.0244622	ENSMUSG00000004263, ENSMUSG00000020091, ENSMUSG00000072872, ENSMUSG00000007872, ENSMUSG00000054452, ENSMUSG00000026511, ENSMUSG00000072294, ENSMUSG00000022508, ENSMUSG00000072115, ENSMUSG00000038418, ENSMUSG00000056493, ENSMUSG00000021366, ENSMUSG00000037992, ENSMUSG00000061436, ENSMUSG00000001910, ENSMUSG00000018604, ENSMUSG00000018537, ENSMUSG00000045294, ENSMUSG00000046876, ENSMUSG00000039910,…	418	430	13588	1.66316	1	0.537357	34.2855
KEGG_PATHWAY	mmu03320:PPAR signaling pathway	7	1.12721	0.0351888	ENSMUSG00000027875, ENSMUSG00000015846, ENSMUSG00000025203, ENSMUSG00000037071, ENSMUSG00000024981, ENSMUSG00000032081, ENSMUSG00000055553	179	79	5738	2.84039	0.99404	0.722148	34.5736
GOTERM_BP_FAT	GO:0010941~regulation of cell death	27	4.34783	0.0252494	ENSMUSG00000019851, ENSMUSG00000007872, ENSMUSG00000020053, ENSMUSG00000042292, ENSMUSG00000022508, ENSMUSG00000000282, ENSMUSG00000061436, ENSMUSG00000042429, ENSMUSG00000018537, ENSMUSG00000018604, ENSMUSG00000008999, ENSMUSG00000057789, ENSMUSG00000040093, ENSMUSG00000030990, ENSMUSG00000068686, ENSMUSG00000062762, ENSMUSG00000020857, ENSMUSG00000014748, ENSMUSG00000030847, ENSMUSG00000003190,…	418	563	13588	1.55896	1	0.542601	35.1786
GOTERM_MF_FAT	GO:0003702~RNA polymerase II transcription factor activity	8	1.28824	0.0300493	ENSMUSG00000061650, ENSMUSG00000045248, ENSMUSG00000039117, ENSMUSG00000017950, ENSMUSG00000052040, ENSMUSG00000031681, ENSMUSG00000058886, ENSMUSG00000015776	390	102	13288	2.6723	1	0.544169	35.6725
GOTERM_BP_FAT	GO:0003007~heart morphogenesis	7	1.12721	0.0258864	ENSMUSG00000009569, ENSMUSG00000007817, ENSMUSG00000018604, ENSMUSG00000015846, ENSMUSG00000026814, ENSMUSG00000022587, ENSMUSG00000015605	418	74	13588	3.075	1	0.545519	35.8931
GOTERM_CC_FAT	GO:0030055~cell-substrate junction	6	0.966184	0.0334395	ENSMUSG00000037003, ENSMUSG00000029528, ENSMUSG00000021262, ENSMUSG00000034664, ENSMUSG00000029860, ENSMUSG00000031216	341	66	12504	3.33351	0.999953	0.274912	36.4192
GOTERM_CC_FAT	GO:0033279~ribosomal subunit	6	0.966184	0.0334395	ENSMUSG00000021607, ENSMUSG00000047215, ENSMUSG00000034880, ENSMUSG00000010406, ENSMUSG00000061474, ENSMUSG00000001445	341	66	12504	3.33351	0.999953	0.274912	36.4192
GOTERM_MF_FAT	GO:0003954~NADH dehydrogenase activity	4	0.644122	0.0319504	ENSMUSG00000064341, ENSMUSG00000064367, ENSMUSG00000064345, ENSMUSG00000064363	390	24	13288	5.67863	1	0.549022	37.4718
GOTERM_MF_FAT	GO:0050136~NADH dehydrogenase (quinone) activity	4	0.644122	0.0319504	ENSMUSG00000064341, ENSMUSG00000064367, ENSMUSG00000064345, ENSMUSG00000064363	390	24	13288	5.67863	1	0.549022	37.4718
GOTERM_MF_FAT	GO:0008137~NADH dehydrogenase (ubiquinone) activity	4	0.644122	0.0319504	ENSMUSG00000064341, ENSMUSG00000064367, ENSMUSG00000064345, ENSMUSG00000064363	390	24	13288	5.67863	1	0.549022	37.4718
GOTERM_BP_FAT	GO:0009890~negative regulation of biosynthetic process	22	3.54267	0.0274056	ENSMUSG00000004263, ENSMUSG00000020091, ENSMUSG00000072872, ENSMUSG00000007872, ENSMUSG00000054452, ENSMUSG00000026511, ENSMUSG00000072294, ENSMUSG00000022508, ENSMUSG00000072115, ENSMUSG00000038418, ENSMUSG00000056493, ENSMUSG00000021366, ENSMUSG00000037992, ENSMUSG00000061436, ENSMUSG00000001910, ENSMUSG00000018604, ENSMUSG00000018537, ENSMUSG00000045294, ENSMUSG00000046876, ENSMUSG00000039910,…	418	434	13588	1.64783	1	0.560273	37.567
GOTERM_MF_FAT	GO:0004842~ubiquitin-protein ligase activity	8	1.28824	0.0329219	ENSMUSG00000036840, ENSMUSG00000005575, ENSMUSG00000018537, ENSMUSG00000019927, ENSMUSG00000078578, ENSMUSG00000020659, ENSMUSG00000036241, ENSMUSG00000024019	390	104	13288	2.62091	1	0.543261	38.3731
KEGG_PATHWAY	mmu00563:Glycosylphosphatidylinositol(GPI)-anchor biosynthesis	4	0.644122	0.0409131	ENSMUSG00000010607, ENSMUSG00000017721, ENSMUSG00000021340, ENSMUSG00000079469	179	25	5738	5.12894	0.997455	0.697212	39.0258
GOTERM_MF_FAT	GO:0016289~CoA hydrolase activity	4	0.644122	0.0355411	ENSMUSG00000060317, ENSMUSG00000017950, ENSMUSG00000046404, ENSMUSG00000021228	390	25	13288	5.45149	1	0.555274	40.7431
GOTERM_CC_FAT	GO:0016323~basolateral plasma membrane	9	1.44928	0.0386823	ENSMUSG00000037003, ENSMUSG00000042429, ENSMUSG00000029528, ENSMUSG00000021262, ENSMUSG00000034664, ENSMUSG00000029860, ENSMUSG00000034254, ENSMUSG00000005087, ENSMUSG00000031216	341	141	12504	2.34055	0.99999	0.303172	40.8608
GOTERM_BP_FAT	GO:0035264~multicellular organism growth	5	0.805153	0.030862	ENSMUSG00000037003, ENSMUSG00000058454, ENSMUSG00000020053, ENSMUSG00000070644, ENSMUSG00000005089	418	39	13588	4.16759	1	0.598147	41.2236
GOTERM_BP_FAT	GO:0015980~energy derivation by oxidation of organic compounds	8	1.28824	0.0310144	ENSMUSG00000064356, ENSMUSG00000064357, ENSMUSG00000064358, ENSMUSG00000064367, ENSMUSG00000031902, ENSMUSG00000064351, ENSMUSG00000064370, ENSMUSG00000064345, ENSMUSG00000064363, ENSMUSG00000064354	418	98	13588	2.65365	1	0.594025	41.3801
GOTERM_CC_FAT	GO:0005774~vacuolar membrane	4	0.644122	0.0395179	ENSMUSG00000026426, ENSMUSG00000024121, ENSMUSG00000028581, ENSMUSG00000010936	341	28	12504	5.23837	0.999993	0.300921	41.5416
GOTERM_MF_FAT	GO:0043565~sequence-specific DNA binding	25	4.02576	0.0369457	ENSMUSG00000000134, ENSMUSG00000003949, ENSMUSG00000017950, ENSMUSG00000040721, ENSMUSG00000022508, ENSMUSG00000020889, ENSMUSG00000056493, ENSMUSG00000032897, ENSMUSG00000038415, ENSMUSG00000037992, ENSMUSG00000026436, ENSMUSG00000015846, ENSMUSG00000018604, ENSMUSG00000047907, ENSMUSG00000008398, ENSMUSG00000071076, ENSMUSG00000032238, ENSMUSG00000021217, ENSMUSG00000003154, ENSMUSG00000023991,…	390	556	13288	1.53201	1	0.554166	41.9789
GOTERM_BP_FAT	GO:0043066~negative regulation of apoptosis	14	2.25443	0.0333948	ENSMUSG00000020857, ENSMUSG00000020053, ENSMUSG00000042292, ENSMUSG00000022508, ENSMUSG00000030847, ENSMUSG00000020423, ENSMUSG00000057342, ENSMUSG00000042429, ENSMUSG00000061436, ENSMUSG00000018537, ENSMUSG00000018604, ENSMUSG00000039910, ENSMUSG00000022174, ENSMUSG00000030990	418	239	13588	1.90419	1	0.615733	43.7741
GOTERM_BP_FAT	GO:0010558~negative regulation of macromolecule biosynthetic process	21	3.38164	0.0335741	ENSMUSG00000004263, ENSMUSG00000020091, ENSMUSG00000072872, ENSMUSG00000007872, ENSMUSG00000054452, ENSMUSG00000026511, ENSMUSG00000072294, ENSMUSG00000022508, ENSMUSG00000072115, ENSMUSG00000038418, ENSMUSG00000056493, ENSMUSG00000021366, ENSMUSG00000037992, ENSMUSG00000061436, ENSMUSG00000001910, ENSMUSG00000018604, ENSMUSG00000018537, ENSMUSG00000046876, ENSMUSG00000039910, ENSMUSG00000008855,…	418	418	13588	1.63314	1	0.611948	43.9506
GOTERM_BP_FAT	GO:0003006~reproductive developmental process	15	2.41546	0.0335772	ENSMUSG00000017950, ENSMUSG00000020053, ENSMUSG00000024949, ENSMUSG00000018604, ENSMUSG00000015846, ENSMUSG00000029556, ENSMUSG00000039117, ENSMUSG00000016758, ENSMUSG00000003810, ENSMUSG00000039910, ENSMUSG00000057789, ENSMUSG00000021594, ENSMUSG00000024985, ENSMUSG00000005087, ENSMUSG00000033487	418	264	13588	1.847	1	0.606288	43.9536
KEGG_PATHWAY	mmu00190:Oxidative phosphorylation	9	1.44928	0.0482466	ENSMUSG00000064356, ENSMUSG00000064341, ENSMUSG00000064357, ENSMUSG00000064358, ENSMUSG00000064367, ENSMUSG00000024121, ENSMUSG00000064351, ENSMUSG00000064370, ENSMUSG00000064345, ENSMUSG00000064363, ENSMUSG00000064354	179	130	5738	2.21925	0.999151	0.692273	44.3241
GOTERM_BP_FAT	GO:0006351~transcription, DNA-dependent	9	1.44928	0.0342137	ENSMUSG00000049295, ENSMUSG00000039117, ENSMUSG00000052040, ENSMUSG00000070002, ENSMUSG00000028266, ENSMUSG00000052293, ENSMUSG00000072115, ENSMUSG00000058886, ENSMUSG00000047371	418	122	13588	2.39807	1	0.607697	44.5761
GOTERM_BP_FAT	GO:0007265~Ras protein signal transduction	6	0.966184	0.0343565	ENSMUSG00000035711, ENSMUSG00000022508, ENSMUSG00000028868, ENSMUSG00000022102, ENSMUSG00000000149, ENSMUSG00000073982	418	59	13588	3.30581	1	0.603735	44.7149
GOTERM_BP_FAT	GO:0042981~regulation of apoptosis	26	4.1868	0.0345593	ENSMUSG00000019851, ENSMUSG00000007872, ENSMUSG00000020053, ENSMUSG00000042292, ENSMUSG00000022508, ENSMUSG00000000282, ENSMUSG00000061436, ENSMUSG00000042429, ENSMUSG00000018537, ENSMUSG00000018604, ENSMUSG00000008999, ENSMUSG00000040093, ENSMUSG00000057789, ENSMUSG00000030990, ENSMUSG00000062762, ENSMUSG00000020857, ENSMUSG00000014748, ENSMUSG00000030847, ENSMUSG00000003190, ENSMUSG00000020423,…	418	553	13588	1.52837	1	0.600499	44.9114
GOTERM_MF_FAT	GO:0016563~transcription activator activity	14	2.25443	0.0415516	ENSMUSG00000003575, ENSMUSG00000009569, ENSMUSG00000041164, ENSMUSG00000027490, ENSMUSG00000017950, ENSMUSG00000042292, ENSMUSG00000038418, ENSMUSG00000056493, ENSMUSG00000028565, ENSMUSG00000006456, ENSMUSG00000029556, ENSMUSG00000053483, ENSMUSG00000046711, ENSMUSG00000039910	390	259	13288	1.84172	1	0.582827	45.8649
INTERPRO	IPR003591:Leucine-rich repeat, typical subtype	9	1.44928	0.0391862	ENSMUSG00000036957, ENSMUSG00000027286, ENSMUSG00000046070, ENSMUSG00000051652, ENSMUSG00000049580, ENSMUSG00000034158, ENSMUSG00000028600, ENSMUSG00000030556, ENSMUSG00000037095	530	129	17763	2.33826	1	0.890511	46.0212
GOTERM_BP_FAT	GO:0043009~chordate embryonic development	21	3.38164	0.0361222	ENSMUSG00000009569, ENSMUSG00000007817, ENSMUSG00000038593, ENSMUSG00000028266, ENSMUSG00000028639, ENSMUSG00000022587, ENSMUSG00000015605, ENSMUSG00000069919, ENSMUSG00000016028, ENSMUSG00000018604, ENSMUSG00000018537, ENSMUSG00000029556, ENSMUSG00000004931, ENSMUSG00000070002, ENSMUSG00000070644, ENSMUSG00000039910, ENSMUSG00000056201, ENSMUSG00000047264, ENSMUSG00000022174, ENSMUSG00000024985,…	418	421	13588	1.6215	1	0.611668	46.4038
INTERPRO	IPR001611:Leucine-rich repeat	12	1.93237	0.0399782	ENSMUSG00000036957, ENSMUSG00000037151, ENSMUSG00000027286, ENSMUSG00000046070, ENSMUSG00000051652, ENSMUSG00000049580, ENSMUSG00000034158, ENSMUSG00000028600, ENSMUSG00000030556, ENSMUSG00000021624, ENSMUSG00000041577, ENSMUSG00000037095	530	202	17763	1.991	1	0.879543	46.7035
GOTERM_MF_FAT	GO:0016655~oxidoreductase activity, acting on NADH or NADPH, quinone or similar compound as acceptor	4	0.644122	0.0433159	ENSMUSG00000064341, ENSMUSG00000064367, ENSMUSG00000064345, ENSMUSG00000064363	390	27	13288	5.04767	1	0.584023	47.2882
GOTERM_CC_FAT	GO:0005605~basal lamina	3	0.483092	0.0471859	ENSMUSG00000015085, ENSMUSG00000072115, ENSMUSG00000032796	341	13	12504	8.46199	0.999999	0.340674	47.4593
INTERPRO	IPR011598:Helix-loop-helix DNA-binding	7	1.12721	0.0411933	ENSMUSG00000004263, ENSMUSG00000022463, ENSMUSG00000000134, ENSMUSG00000038342, ENSMUSG00000026077, ENSMUSG00000037621, ENSMUSG00000000282	530	85	17763	2.76007	1	0.871753	47.7345
KEGG_PATHWAY	mmu05012:Parkinson's disease	9	1.44928	0.053884	ENSMUSG00000064356, ENSMUSG00000064341, ENSMUSG00000064357, ENSMUSG00000064358, ENSMUSG00000064367, ENSMUSG00000064351, ENSMUSG00000064370, ENSMUSG00000064345, ENSMUSG00000055553, ENSMUSG00000064363, ENSMUSG00000064354	179	133	5738	2.16919	0.999637	0.677464	48.1066
GOTERM_BP_FAT	GO:0009792~embryonic development ending in birth or egg hatching	21	3.38164	0.0385764	ENSMUSG00000009569, ENSMUSG00000007817, ENSMUSG00000038593, ENSMUSG00000028266, ENSMUSG00000028639, ENSMUSG00000022587, ENSMUSG00000015605, ENSMUSG00000069919, ENSMUSG00000016028, ENSMUSG00000018604, ENSMUSG00000018537, ENSMUSG00000029556, ENSMUSG00000004931, ENSMUSG00000070002, ENSMUSG00000070644, ENSMUSG00000039910, ENSMUSG00000056201, ENSMUSG00000047264, ENSMUSG00000022174, ENSMUSG00000024985,…	418	425	13588	1.60624	1	0.631012	48.6708
GOTERM_BP_FAT	GO:0001763~morphogenesis of a branching structure	9	1.44928	0.0386673	ENSMUSG00000029528, ENSMUSG00000018604, ENSMUSG00000020053, ENSMUSG00000026814, ENSMUSG00000008999, ENSMUSG00000030123, ENSMUSG00000032796, ENSMUSG00000015605, ENSMUSG00000005087	418	125	13588	2.34052	1	0.626678	48.7531
GOTERM_BP_FAT	GO:0043069~negative regulation of programmed cell death	14	2.25443	0.038681	ENSMUSG00000020857, ENSMUSG00000020053, ENSMUSG00000042292, ENSMUSG00000022508, ENSMUSG00000030847, ENSMUSG00000020423, ENSMUSG00000057342, ENSMUSG00000042429, ENSMUSG00000061436, ENSMUSG00000018537, ENSMUSG00000018604, ENSMUSG00000039910, ENSMUSG00000022174, ENSMUSG00000030990	418	244	13588	1.86517	1	0.621666	48.7654
GOTERM_MF_FAT	GO:0005506~iron ion binding	17	2.73752	0.0458346	ENSMUSG00000050708, ENSMUSG00000025203, ENSMUSG00000037071, ENSMUSG00000064351, ENSMUSG00000027983, ENSMUSG00000036073, ENSMUSG00000064370, ENSMUSG00000064354, ENSMUSG00000079677, ENSMUSG00000069919, ENSMUSG00000025197, ENSMUSG00000033022, ENSMUSG00000024661, ENSMUSG00000023963, ENSMUSG00000034832, ENSMUSG00000006471, ENSMUSG00000069917, ENSMUSG00000034248	390	343	13288	1.68869	1	0.59136	49.2597
GOTERM_BP_FAT	GO:0043067~regulation of programmed cell death	26	4.1868	0.0392652	ENSMUSG00000019851, ENSMUSG00000007872, ENSMUSG00000020053, ENSMUSG00000042292, ENSMUSG00000022508, ENSMUSG00000000282, ENSMUSG00000061436, ENSMUSG00000042429, ENSMUSG00000018537, ENSMUSG00000018604, ENSMUSG00000008999, ENSMUSG00000040093, ENSMUSG00000057789, ENSMUSG00000030990, ENSMUSG00000062762, ENSMUSG00000020857, ENSMUSG00000014748, ENSMUSG00000030847, ENSMUSG00000003190, ENSMUSG00000020423,…	418	560	13588	1.50926	1	0.622218	49.2908
GOTERM_BP_FAT	GO:0010605~negative regulation of macromolecule metabolic process	24	3.86473	0.0394034	ENSMUSG00000004263, ENSMUSG00000020091, ENSMUSG00000072872, ENSMUSG00000017950, ENSMUSG00000007872, ENSMUSG00000054452, ENSMUSG00000026511, ENSMUSG00000072294, ENSMUSG00000022508, ENSMUSG00000072115, ENSMUSG00000038418, ENSMUSG00000056493, ENSMUSG00000021366, ENSMUSG00000037992, ENSMUSG00000061436, ENSMUSG00000001910, ENSMUSG00000018604, ENSMUSG00000018537, ENSMUSG00000046876, ENSMUSG00000057789,…	418	506	13588	1.54184	1	0.618533	49.4142
GOTERM_BP_FAT	GO:0032774~RNA biosynthetic process	9	1.44928	0.0402341	ENSMUSG00000049295, ENSMUSG00000039117, ENSMUSG00000052040, ENSMUSG00000070002, ENSMUSG00000028266, ENSMUSG00000052293, ENSMUSG00000072115, ENSMUSG00000058886, ENSMUSG00000047371	418	126	13588	2.32194	1	0.621427	50.1508
INTERPRO	IPR015940:Ubiquitin-associated/translation elongation factor EF1B, N-terminal, eukaryote	5	0.805153	0.04435	ENSMUSG00000055720, ENSMUSG00000024042, ENSMUSG00000003813, ENSMUSG00000008604, ENSMUSG00000042520	530	45	17763	3.7239	1	0.876531	50.3265
GOTERM_BP_FAT	GO:0007507~heart development	13	2.0934	0.0428228	ENSMUSG00000009569, ENSMUSG00000007817, ENSMUSG00000007872, ENSMUSG00000022587, ENSMUSG00000015605, ENSMUSG00000037992, ENSMUSG00000018604, ENSMUSG00000015846, ENSMUSG00000031902, ENSMUSG00000026814, ENSMUSG00000039910, ENSMUSG00000008855, ENSMUSG00000023991	418	223	13588	1.89504	1	0.639985	52.3817
INTERPRO	IPR001092:Basic helix-loop-helix dimerisation region bHLH	8	1.28824	0.048097	ENSMUSG00000004263, ENSMUSG00000022463, ENSMUSG00000000134, ENSMUSG00000038342, ENSMUSG00000007872, ENSMUSG00000026077, ENSMUSG00000037621, ENSMUSG00000000282	530	111	17763	2.4155	1	0.883898	53.2472
GOTERM_BP_FAT	GO:0030029~actin filament-based process	11	1.77134	0.0449972	ENSMUSG00000021262, ENSMUSG00000029684, ENSMUSG00000022508, ENSMUSG00000056201, ENSMUSG00000072115, ENSMUSG00000028868, ENSMUSG00000015605, ENSMUSG00000033220, ENSMUSG00000075284, ENSMUSG00000025422, ENSMUSG00000073982	418	176	13588	2.0317	1	0.653799	54.1826
GOTERM_BP_FAT	GO:0033674~positive regulation of kinase activity	9	1.44928	0.0469225	ENSMUSG00000055980, ENSMUSG00000042429, ENSMUSG00000029528, ENSMUSG00000040479, ENSMUSG00000028062, ENSMUSG00000034731, ENSMUSG00000025422, ENSMUSG00000032578, ENSMUSG00000057342	418	130	13588	2.2505	1	0.664803	55.7236
GOTERM_BP_FAT	GO:0048608~reproductive structure development	9	1.44928	0.0469225	ENSMUSG00000015846, ENSMUSG00000029556, ENSMUSG00000039117, ENSMUSG00000016758, ENSMUSG00000020053, ENSMUSG00000057789, ENSMUSG00000024949, ENSMUSG00000005087, ENSMUSG00000033487	418	130	13588	2.2505	1	0.664803	55.7236
GOTERM_MF_FAT	GO:0016251~general RNA polymerase II transcription factor activity	4	0.644122	0.0564213	ENSMUSG00000061650, ENSMUSG00000045248, ENSMUSG00000039117, ENSMUSG00000015776	390	30	13288	4.54291	1	0.656365	56.8198
GOTERM_CC_FAT	GO:0044454~nuclear chromosome part	7	1.12721	0.0617392	ENSMUSG00000041164, ENSMUSG00000018537, ENSMUSG00000038000, ENSMUSG00000060743, ENSMUSG00000039086, ENSMUSG00000039910, ENSMUSG00000059851	341	103	12504	2.49204	1	0.413445	57.1954
GOTERM_MF_FAT	GO:0005525~GTP binding	17	2.73752	0.0572499	ENSMUSG00000059248, ENSMUSG00000054855, ENSMUSG00000029518, ENSMUSG00000025733, ENSMUSG00000033220, ENSMUSG00000025422, ENSMUSG00000030137, ENSMUSG00000044147, ENSMUSG00000033021, ENSMUSG00000026426, ENSMUSG00000078922, ENSMUSG00000021282, ENSMUSG00000032198, ENSMUSG00000032300, ENSMUSG00000016637, ENSMUSG00000000149, ENSMUSG00000073982	390	354	13288	1.63622	1	0.64899	57.3648
INTERPRO	IPR019954:Ubiquitin conserved site	4	0.644122	0.0541327	ENSMUSG00000025171, ENSMUSG00000003813, ENSMUSG00000008604, ENSMUSG00000055553	530	29	17763	4.62277	1	0.900699	57.6163
INTERPRO	IPR002404:Insulin receptor substrate-1, PTB	3	0.483092	0.0555827	ENSMUSG00000055980, ENSMUSG00000035711, ENSMUSG00000022102	530	13	17763	7.73425	1	0.895676	58.6075
INTERPRO	IPR001206:Diacylglycerol kinase, catalytic region	3	0.483092	0.0555827	ENSMUSG00000040479, ENSMUSG00000034731, ENSMUSG00000057342	530	13	17763	7.73425	1	0.895676	58.6075
GOTERM_MF_FAT	GO:0004707~MAP kinase activity	3	0.483092	0.061678	ENSMUSG00000017376, ENSMUSG00000063704, ENSMUSG00000042688	390	14	13288	7.3011	1	0.664746	60.1708
INTERPRO	IPR005559:CG-1	2	0.322061	0.0586767	ENSMUSG00000040712, ENSMUSG00000014592	530	2	17763	33.5151	1	0.89785	60.6504
INTERPRO	IPR004552:1-acyl-sn-glycerol-3-phosphate acyltransferase	2	0.322061	0.0586767	ENSMUSG00000034254, ENSMUSG00000026922	530	2	17763	33.5151	1	0.89785	60.6504
GOTERM_MF_FAT	GO:0019207~kinase regulator activity	6	0.966184	0.0624962	ENSMUSG00000031834, ENSMUSG00000038990, ENSMUSG00000063015, ENSMUSG00000046447, ENSMUSG00000025422, ENSMUSG00000010936	390	73	13288	2.80042	1	0.657713	60.6701
GOTERM_CC_FAT	GO:0044437~vacuolar part	4	0.644122	0.068822	ENSMUSG00000026426, ENSMUSG00000024121, ENSMUSG00000028581, ENSMUSG00000010936	341	35	12504	4.1907	1	0.440293	61.3033
GOTERM_BP_FAT	GO:0001649~osteoblast differentiation	5	0.805153	0.0554217	ENSMUSG00000031681, ENSMUSG00000071076, ENSMUSG00000020053, ENSMUSG00000008855, ENSMUSG00000055553	418	47	13588	3.45821	1	0.72206	61.9615
GOTERM_BP_FAT	GO:0051347~positive regulation of transferase activity	9	1.44928	0.0562526	ENSMUSG00000055980, ENSMUSG00000042429, ENSMUSG00000029528, ENSMUSG00000040479, ENSMUSG00000028062, ENSMUSG00000034731, ENSMUSG00000025422, ENSMUSG00000032578, ENSMUSG00000057342	418	135	13588	2.16715	1	0.723034	62.5248
INTERPRO	IPR000253:Forkhead-associated	4	0.644122	0.0637867	ENSMUSG00000072825, ENSMUSG00000020821, ENSMUSG00000056493, ENSMUSG00000024019	530	31	17763	4.32453	1	0.907316	63.8193
KEGG_PATHWAY	mmu04070:Phosphatidylinositol signaling system	6	0.966184	0.0824116	ENSMUSG00000026925, ENSMUSG00000031834, ENSMUSG00000040479, ENSMUSG00000034731, ENSMUSG00000030228, ENSMUSG00000030682	179	75	5738	2.56447	0.999995	0.785053	63.8886
GOTERM_MF_FAT	GO:0032561~guanyl ribonucleotide binding	17	2.73752	0.0682344	ENSMUSG00000059248, ENSMUSG00000054855, ENSMUSG00000029518, ENSMUSG00000025733, ENSMUSG00000033220, ENSMUSG00000025422, ENSMUSG00000030137, ENSMUSG00000044147, ENSMUSG00000033021, ENSMUSG00000026426, ENSMUSG00000078922, ENSMUSG00000021282, ENSMUSG00000032198, ENSMUSG00000032300, ENSMUSG00000016637, ENSMUSG00000000149, ENSMUSG00000073982	390	363	13288	1.59565	1	0.679352	64.0113
GOTERM_MF_FAT	GO:0019001~guanyl nucleotide binding	17	2.73752	0.0682344	ENSMUSG00000059248, ENSMUSG00000054855, ENSMUSG00000029518, ENSMUSG00000025733, ENSMUSG00000033220, ENSMUSG00000025422, ENSMUSG00000030137, ENSMUSG00000044147, ENSMUSG00000033021, ENSMUSG00000026426, ENSMUSG00000078922, ENSMUSG00000021282, ENSMUSG00000032198, ENSMUSG00000032300, ENSMUSG00000016637, ENSMUSG00000000149, ENSMUSG00000073982	390	363	13288	1.59565	1	0.679352	64.0113
GOTERM_BP_FAT	GO:0008154~actin polymerization or depolymerization	3	0.483092	0.0586186	ENSMUSG00000021262, ENSMUSG00000029684, ENSMUSG00000072115	418	13	13588	7.50166	1	0.733661	64.0861
INTERPRO	IPR000571:Zinc finger, CCCH-type	5	0.805153	0.0648773	ENSMUSG00000021127, ENSMUSG00000009076, ENSMUSG00000078765, ENSMUSG00000018727, ENSMUSG00000044786	530	51	17763	3.28579	1	0.901703	64.4639
GOTERM_MF_FAT	GO:0016290~palmitoyl-CoA hydrolase activity	3	0.483092	0.069826	ENSMUSG00000060317, ENSMUSG00000017950, ENSMUSG00000021228	390	15	13288	6.81436	1	0.676845	64.89
GOTERM_MF_FAT	GO:0004143~diacylglycerol kinase activity	3	0.483092	0.069826	ENSMUSG00000040479, ENSMUSG00000034731, ENSMUSG00000057342	390	15	13288	6.81436	1	0.676845	64.89
GOTERM_BP_FAT	GO:0030573~bile acid catabolic process	2	0.322061	0.0604381	ENSMUSG00000038641, ENSMUSG00000023963	418	2	13588	32.5072	1	0.740424	65.2448
GOTERM_BP_FAT	GO:0045010~actin nucleation	2	0.322061	0.0604381	ENSMUSG00000021262, ENSMUSG00000029684	418	2	13588	32.5072	1	0.740424	65.2448
KEGG_PATHWAY	mmu04370:VEGF signaling pathway	6	0.966184	0.0861139	ENSMUSG00000029528, ENSMUSG00000031834, ENSMUSG00000031902, ENSMUSG00000042632, ENSMUSG00000033220, ENSMUSG00000057342	179	76	5738	2.53073	0.999997	0.760879	65.5769
GOTERM_CC_FAT	GO:0030425~dendrite	7	1.12721	0.0793457	ENSMUSG00000042429, ENSMUSG00000035392, ENSMUSG00000043079, ENSMUSG00000003378, ENSMUSG00000022791, ENSMUSG00000046447, ENSMUSG00000005089	341	110	12504	2.33346	1	0.480382	66.7379
INTERPRO	IPR002909:Cell surface receptor IPT/TIG	4	0.644122	0.0688909	ENSMUSG00000031902, ENSMUSG00000040712, ENSMUSG00000030123, ENSMUSG00000014592	530	32	17763	4.18939	1	0.906498	66.745
GOTERM_BP_FAT	GO:0016126~sterol biosynthetic process	4	0.644122	0.0632287	ENSMUSG00000021252, ENSMUSG00000027875, ENSMUSG00000058454, ENSMUSG00000045294	418	30	13588	4.33429	1	0.752423	66.9539
GOTERM_BP_FAT	GO:0006506~GPI anchor biosynthetic process	4	0.644122	0.0632287	ENSMUSG00000010607, ENSMUSG00000017721, ENSMUSG00000079469, ENSMUSG00000030990	418	30	13588	4.33429	1	0.752423	66.9539
GOTERM_BP_FAT	GO:0001558~regulation of cell growth	7	1.12721	0.0635021	ENSMUSG00000027394, ENSMUSG00000002083, ENSMUSG00000004798, ENSMUSG00000030168, ENSMUSG00000056493, ENSMUSG00000028755, ENSMUSG00000062762	418	92	13588	2.47337	1	0.749821	67.117
GOTERM_BP_FAT	GO:0045934~negative regulation of nucleobase, nucleoside, nucleotide and nucleic acid metabolic process	19	3.05958	0.065379	ENSMUSG00000004263, ENSMUSG00000072872, ENSMUSG00000007872, ENSMUSG00000054452, ENSMUSG00000072294, ENSMUSG00000022508, ENSMUSG00000038418, ENSMUSG00000056493, ENSMUSG00000021366, ENSMUSG00000037992, ENSMUSG00000061436, ENSMUSG00000001910, ENSMUSG00000018604, ENSMUSG00000018537, ENSMUSG00000046876, ENSMUSG00000039910, ENSMUSG00000008855, ENSMUSG00000028755, ENSMUSG00000023991	418	397	13588	1.55576	1	0.756137	68.2166
GOTERM_BP_FAT	GO:0045926~negative regulation of growth	6	0.966184	0.0667046	ENSMUSG00000002083, ENSMUSG00000004798, ENSMUSG00000030168, ENSMUSG00000056493, ENSMUSG00000028755, ENSMUSG00000062762	418	71	13588	2.74709	1	0.759255	68.9721
GOTERM_BP_FAT	GO:0006497~protein amino acid lipidation	5	0.805153	0.0667061	ENSMUSG00000010607, ENSMUSG00000017721, ENSMUSG00000025786, ENSMUSG00000079469, ENSMUSG00000030990	418	50	13588	3.25072	1	0.75529	68.973
GOTERM_BP_FAT	GO:0042775~mitochondrial ATP synthesis coupled electron transport	3	0.483092	0.0670356	ENSMUSG00000064356, ENSMUSG00000064357, ENSMUSG00000064358, ENSMUSG00000064345, ENSMUSG00000064363	418	14	13588	6.96582	1	0.753108	69.1582
GOTERM_CC_FAT	GO:0031252~cell leading edge	7	1.12721	0.0848441	ENSMUSG00000020857, ENSMUSG00000042429, ENSMUSG00000029528, ENSMUSG00000021262, ENSMUSG00000029684, ENSMUSG00000028868, ENSMUSG00000005089	341	112	12504	2.29179	1	0.495215	69.2878
GOTERM_BP_FAT	GO:0016481~negative regulation of transcription	18	2.89855	0.0678064	ENSMUSG00000004263, ENSMUSG00000072872, ENSMUSG00000007872, ENSMUSG00000054452, ENSMUSG00000072294, ENSMUSG00000022508, ENSMUSG00000038418, ENSMUSG00000056493, ENSMUSG00000021366, ENSMUSG00000037992, ENSMUSG00000061436, ENSMUSG00000001910, ENSMUSG00000018604, ENSMUSG00000018537, ENSMUSG00000046876, ENSMUSG00000039910, ENSMUSG00000008855, ENSMUSG00000023991	418	372	13588	1.57293	1	0.753295	69.5873
GOTERM_BP_FAT	GO:0030036~actin cytoskeleton organization	10	1.61031	0.0680292	ENSMUSG00000021262, ENSMUSG00000029684, ENSMUSG00000022508, ENSMUSG00000056201, ENSMUSG00000072115, ENSMUSG00000028868, ENSMUSG00000015605, ENSMUSG00000033220, ENSMUSG00000025422, ENSMUSG00000073982	418	165	13588	1.97013	1	0.750607	69.7103
GOTERM_BP_FAT	GO:0046489~phosphoinositide biosynthetic process	4	0.644122	0.0684728	ENSMUSG00000010607, ENSMUSG00000017721, ENSMUSG00000079469, ENSMUSG00000030990	418	31	13588	4.19447	1	0.749111	69.9538
GOTERM_BP_FAT	GO:0032269~negative regulation of cellular protein metabolic process	6	0.966184	0.0699689	ENSMUSG00000020091, ENSMUSG00000017950, ENSMUSG00000026511, ENSMUSG00000057789, ENSMUSG00000072115, ENSMUSG00000068686	418	72	13588	2.70893	1	0.753084	70.7615
GOTERM_BP_FAT	GO:0051172~negative regulation of nitrogen compound metabolic process	19	3.05958	0.0705213	ENSMUSG00000004263, ENSMUSG00000072872, ENSMUSG00000007872, ENSMUSG00000054452, ENSMUSG00000072294, ENSMUSG00000022508, ENSMUSG00000038418, ENSMUSG00000056493, ENSMUSG00000021366, ENSMUSG00000037992, ENSMUSG00000061436, ENSMUSG00000001910, ENSMUSG00000018604, ENSMUSG00000018537, ENSMUSG00000046876, ENSMUSG00000039910, ENSMUSG00000008855, ENSMUSG00000028755, ENSMUSG00000023991	418	401	13588	1.54024	1	0.752167	71.0545
GOTERM_CC_FAT	GO:0030027~lamellipodium	5	0.805153	0.091953	ENSMUSG00000020857, ENSMUSG00000029528, ENSMUSG00000021262, ENSMUSG00000029684, ENSMUSG00000028868	341	63	12504	2.91021	1	0.51552	72.3168
GOTERM_CC_FAT	GO:0044445~cytosolic part	5	0.805153	0.091953	ENSMUSG00000069919, ENSMUSG00000031834, ENSMUSG00000047215, ENSMUSG00000025271, ENSMUSG00000030228, ENSMUSG00000069917	341	63	12504	2.91021	1	0.51552	72.3168
GOTERM_MF_FAT	GO:0005158~insulin receptor binding	3	0.483092	0.0870783	ENSMUSG00000055980, ENSMUSG00000035711, ENSMUSG00000022102	390	17	13288	6.01267	1	0.748415	73.217
GOTERM_BP_FAT	GO:0008206~bile acid metabolic process	3	0.483092	0.0758228	ENSMUSG00000038641, ENSMUSG00000029556, ENSMUSG00000023963	418	15	13588	6.50144	1	0.774201	73.7295
GOTERM_BP_FAT	GO:0030048~actin filament-based movement	3	0.483092	0.0758228	ENSMUSG00000021262, ENSMUSG00000028868, ENSMUSG00000075284	418	15	13588	6.50144	1	0.774201	73.7295
GOTERM_BP_FAT	GO:0006366~transcription from RNA polymerase II promoter	6	0.966184	0.0767572	ENSMUSG00000039117, ENSMUSG00000052040, ENSMUSG00000070002, ENSMUSG00000028266, ENSMUSG00000058886, ENSMUSG00000047371	418	74	13588	2.63572	1	0.774928	74.1761
GOTERM_BP_FAT	GO:0007167~enzyme linked receptor protein signaling pathway	14	2.25443	0.078905	ENSMUSG00000020091, ENSMUSG00000055980, ENSMUSG00000017376, ENSMUSG00000020053, ENSMUSG00000022102, ENSMUSG00000002489, ENSMUSG00000061436, ENSMUSG00000031834, ENSMUSG00000039844, ENSMUSG00000031681, ENSMUSG00000024621, ENSMUSG00000003378, ENSMUSG00000026814, ENSMUSG00000008999	418	273	13588	1.66703	1	0.781034	75.1759
INTERPRO	IPR007591:Single-stranded DNA-binding protein, SSDP	2	0.322061	0.0867134	ENSMUSG00000061887, ENSMUSG00000070003	530	3	17763	22.3434	1	0.944734	75.3173
INTERPRO	IPR008116:Sequence-specific single-strand DNA-binding protein	2	0.322061	0.0867134	ENSMUSG00000061887, ENSMUSG00000070003	530	3	17763	22.3434	1	0.944734	75.3173
GOTERM_BP_FAT	GO:0016310~phosphorylation	30	4.83092	0.0793875	ENSMUSG00000009828, ENSMUSG00000042349, ENSMUSG00000003228, ENSMUSG00000038967, ENSMUSG00000002205, ENSMUSG00000064345, ENSMUSG00000064363, ENSMUSG00000061436, ENSMUSG00000042429, ENSMUSG00000029528, ENSMUSG00000064367, ENSMUSG00000003810, ENSMUSG00000017376, ENSMUSG00000042688, ENSMUSG00000063704, ENSMUSG00000028062, ENSMUSG00000024235, ENSMUSG00000030228, ENSMUSG00000026749, ENSMUSG00000022791,…	418	718	13588	1.35824	1	0.7797	75.3954
GOTERM_BP_FAT	GO:0030705~cytoskeleton-dependent intracellular transport	4	0.644122	0.0795272	ENSMUSG00000021262, ENSMUSG00000028868, ENSMUSG00000025733, ENSMUSG00000075284	418	33	13588	3.94026	1	0.776887	75.4587
GOTERM_BP_FAT	GO:0006915~apoptosis	21	3.38164	0.0811848	ENSMUSG00000036840, ENSMUSG00000042677, ENSMUSG00000042675, ENSMUSG00000072872, ENSMUSG00000019851, ENSMUSG00000067787, ENSMUSG00000027490, ENSMUSG00000026749, ENSMUSG00000030847, ENSMUSG00000003190, ENSMUSG00000025733, ENSMUSG00000017721, ENSMUSG00000023915, ENSMUSG00000061436, ENSMUSG00000044147, ENSMUSG00000002083, ENSMUSG00000057789, ENSMUSG00000040093, ENSMUSG00000045867, ENSMUSG00000022174,…	418	465	13588	1.46807	1	0.78068	76.1972
INTERPRO	IPR005113:uDENN	3	0.483092	0.0896993	ENSMUSG00000053641, ENSMUSG00000035392, ENSMUSG00000042404	530	17	17763	5.91443	1	0.944369	76.533
INTERPRO	IPR001194:DENN	3	0.483092	0.0896993	ENSMUSG00000053641, ENSMUSG00000035392, ENSMUSG00000042404	530	17	17763	5.91443	1	0.944369	76.533
GOTERM_BP_FAT	GO:0042157~lipoprotein metabolic process	6	0.966184	0.0838879	ENSMUSG00000010607, ENSMUSG00000017721, ENSMUSG00000025786, ENSMUSG00000079469, ENSMUSG00000030990, ENSMUSG00000032081	418	76	13588	2.56636	1	0.788666	77.3568
GOTERM_BP_FAT	GO:0044265~cellular macromolecule catabolic process	26	4.1868	0.0853584	ENSMUSG00000021127, ENSMUSG00000025226, ENSMUSG00000046404, ENSMUSG00000003813, ENSMUSG00000027466, ENSMUSG00000024019, ENSMUSG00000055720, ENSMUSG00000053483, ENSMUSG00000019927, ENSMUSG00000030610, ENSMUSG00000020659, ENSMUSG00000036835, ENSMUSG00000034343, ENSMUSG00000036840, ENSMUSG00000032245, ENSMUSG00000036241, ENSMUSG00000038784, ENSMUSG00000005575, ENSMUSG00000030509, ENSMUSG00000048175,…	418	609	13588	1.38783	1	0.79136	77.9652
GOTERM_BP_FAT	GO:0045860~positive regulation of protein kinase activity	8	1.28824	0.0872359	ENSMUSG00000042429, ENSMUSG00000029528, ENSMUSG00000040479, ENSMUSG00000028062, ENSMUSG00000034731, ENSMUSG00000025422, ENSMUSG00000032578, ENSMUSG00000057342	418	124	13588	2.09724	1	0.795567	78.7195
GOTERM_BP_FAT	GO:0042158~lipoprotein biosynthetic process	5	0.805153	0.08793	ENSMUSG00000010607, ENSMUSG00000017721, ENSMUSG00000025786, ENSMUSG00000079469, ENSMUSG00000030990	418	55	13588	2.9552	1	0.795095	78.9922
GOTERM_BP_FAT	GO:0051248~negative regulation of protein metabolic process	6	0.966184	0.0913558	ENSMUSG00000020091, ENSMUSG00000017950, ENSMUSG00000026511, ENSMUSG00000057789, ENSMUSG00000072115, ENSMUSG00000068686	418	78	13588	2.50055	1	0.804883	80.2905
GOTERM_BP_FAT	GO:0012501~programmed cell death	21	3.38164	0.0924207	ENSMUSG00000036840, ENSMUSG00000042677, ENSMUSG00000042675, ENSMUSG00000072872, ENSMUSG00000019851, ENSMUSG00000067787, ENSMUSG00000027490, ENSMUSG00000026749, ENSMUSG00000030847, ENSMUSG00000003190, ENSMUSG00000025733, ENSMUSG00000017721, ENSMUSG00000023915, ENSMUSG00000061436, ENSMUSG00000044147, ENSMUSG00000002083, ENSMUSG00000057789, ENSMUSG00000040093, ENSMUSG00000045867, ENSMUSG00000022174,…	418	473	13588	1.44324	1	0.80571	80.6785
GOTERM_BP_FAT	GO:0006119~oxidative phosphorylation	5	0.805153	0.0925234	ENSMUSG00000064356, ENSMUSG00000064357, ENSMUSG00000064358, ENSMUSG00000064367, ENSMUSG00000024121, ENSMUSG00000064345, ENSMUSG00000064363	418	56	13588	2.90243	1	0.803057	80.7155
GOTERM_BP_FAT	GO:0007015~actin filament organization	5	0.805153	0.0925234	ENSMUSG00000021262, ENSMUSG00000029684, ENSMUSG00000056201, ENSMUSG00000072115, ENSMUSG00000015605	418	56	13588	2.90243	1	0.803057	80.7155
GOTERM_BP_FAT	GO:0045892~negative regulation of transcription, DNA-dependent	15	2.41546	0.0937275	ENSMUSG00000004263, ENSMUSG00000072872, ENSMUSG00000007872, ENSMUSG00000072294, ENSMUSG00000022508, ENSMUSG00000038418, ENSMUSG00000056493, ENSMUSG00000021366, ENSMUSG00000037992, ENSMUSG00000061436, ENSMUSG00000018604, ENSMUSG00000018537, ENSMUSG00000039910, ENSMUSG00000008855, ENSMUSG00000023991	418	308	13588	1.58314	1	0.804397	81.1447
GOTERM_BP_FAT	GO:0051253~negative regulation of RNA metabolic process	15	2.41546	0.0972041	ENSMUSG00000004263, ENSMUSG00000072872, ENSMUSG00000007872, ENSMUSG00000072294, ENSMUSG00000022508, ENSMUSG00000038418, ENSMUSG00000056493, ENSMUSG00000021366, ENSMUSG00000037992, ENSMUSG00000061436, ENSMUSG00000018604, ENSMUSG00000018537, ENSMUSG00000039910, ENSMUSG00000008855, ENSMUSG00000023991	418	310	13588	1.57293	1	0.813569	82.3341
GOTERM_BP_FAT	GO:0008284~positive regulation of cell proliferation	14	2.25443	0.0991596	ENSMUSG00000020857, ENSMUSG00000055980, ENSMUSG00000007817, ENSMUSG00000020053, ENSMUSG00000022508, ENSMUSG00000072115, ENSMUSG00000033220, ENSMUSG00000057342, ENSMUSG00000037992, ENSMUSG00000061436, ENSMUSG00000001910, ENSMUSG00000018604, ENSMUSG00000054263, ENSMUSG00000034254	418	284	13588	1.60247	1	0.817239	82.9717
GOTERM_BP_FAT	GO:0051603~proteolysis involved in cellular protein catabolic process	23	3.7037	0.0998223	ENSMUSG00000036840, ENSMUSG00000025226, ENSMUSG00000046404, ENSMUSG00000003813, ENSMUSG00000036241, ENSMUSG00000027466, ENSMUSG00000038784, ENSMUSG00000024019, ENSMUSG00000005575, ENSMUSG00000055720, ENSMUSG00000030509, ENSMUSG00000048175, ENSMUSG00000053483, ENSMUSG00000019927, ENSMUSG00000027602, ENSMUSG00000030610, ENSMUSG00000078578, ENSMUSG00000020659, ENSMUSG00000036835, ENSMUSG00000015120,…	418	534	13588	1.40012	1	0.816583	83.1828

## Sheet: GO_Diff_TE_genes_320(up_in_kid)
Category	Term	Count	%	PValue	Genes	List Total	Pop Hits	Pop Total	Fold Enrichment	Bonferroni	Benjamini	FDR
GOTERM_MF_FAT	GO:0003779~actin binding	17	5.43131	3.94542e-05	ENSMUSG00000038976, ENSMUSG00000024397, ENSMUSG00000024236, ENSMUSG00000030739, ENSMUSG00000029621, ENSMUSG00000029761, ENSMUSG00000054150, ENSMUSG00000028649, ENSMUSG00000028464, ENSMUSG00000052698, ENSMUSG00000044042, ENSMUSG00000025429, ENSMUSG00000024044, ENSMUSG00000020315, ENSMUSG00000018417, ENSMUSG00000063450, ENSMUSG00000026131	230	288	13288	3.41027	0.017598	0.017598	0.0559589
INTERPRO	IPR018159:Spectrin/alpha-actinin	6	1.91693	0.000147326	ENSMUSG00000028649, ENSMUSG00000044033, ENSMUSG00000020315, ENSMUSG00000026131, ENSMUSG00000063450, ENSMUSG00000054150	287	32	17763	11.6047	0.0915941	0.0915941	0.219838
GOTERM_CC_FAT	GO:0015629~actin cytoskeleton	13	4.15335	0.000222929	ENSMUSG00000038976, ENSMUSG00000024397, ENSMUSG00000024236, ENSMUSG00000029621, ENSMUSG00000030739, ENSMUSG00000029761, ENSMUSG00000028649, ENSMUSG00000028464, ENSMUSG00000032827, ENSMUSG00000044042, ENSMUSG00000020315, ENSMUSG00000018417, ENSMUSG00000026131	216	205	12504	3.671	0.0533698	0.0533698	0.288487
GOTERM_CC_FAT	GO:0005788~endoplasmic reticulum lumen	8	2.55591	0.000230187	ENSMUSG00000037470, ENSMUSG00000069456, ENSMUSG00000069922, ENSMUSG00000005973, ENSMUSG00000029767, ENSMUSG00000057400, ENSMUSG00000029781, ENSMUSG00000026047	216	72	12504	6.4321	0.0550588	0.0279191	0.297866
KEGG_PATHWAY	mmu04610:Complement and coagulation cascades	8	2.55591	0.000336303	ENSMUSG00000061780, ENSMUSG00000072849, ENSMUSG00000022875, ENSMUSG00000033831, ENSMUSG00000032679, ENSMUSG00000038521, ENSMUSG00000027249, ENSMUSG00000031444	103	75	5738	5.94227	0.0385897	0.0385897	0.383609
INTERPRO	IPR002017:Spectrin repeat	5	1.59744	0.000382908	ENSMUSG00000028649, ENSMUSG00000020315, ENSMUSG00000026131, ENSMUSG00000063450, ENSMUSG00000054150	287	22	17763	14.0664	0.220969	0.117372	0.570433
INTERPRO	IPR000886:Endoplasmic reticulum, targeting sequence	6	1.91693	0.000609567	ENSMUSG00000037470, ENSMUSG00000030968, ENSMUSG00000029103, ENSMUSG00000005973, ENSMUSG00000029781, ENSMUSG00000026047	287	43	17763	8.63609	0.328042	0.124114	0.906664
GOTERM_CC_FAT	GO:0005626~insoluble fraction	21	6.70927	0.000783016	ENSMUSG00000074254, ENSMUSG00000028955, ENSMUSG00000056035, ENSMUSG00000069456, ENSMUSG00000036833, ENSMUSG00000025809, ENSMUSG00000038489, ENSMUSG00000029761, ENSMUSG00000034485, ENSMUSG00000022206, ENSMUSG00000022822, ENSMUSG00000024924, ENSMUSG00000050541, ENSMUSG00000037601, ENSMUSG00000038541, ENSMUSG00000028713, ENSMUSG00000025429, ENSMUSG00000033792, ENSMUSG00000032060, ENSMUSG00000030671,…	216	528	12504	2.3024	0.175269	0.0622131	1.0099
GOTERM_CC_FAT	GO:0044421~extracellular region part	27	8.6262	0.000798785	ENSMUSG00000004098, ENSMUSG00000024421, ENSMUSG00000017344, ENSMUSG00000033831, ENSMUSG00000024990, ENSMUSG00000024924, ENSMUSG00000061780, ENSMUSG00000022868, ENSMUSG00000048368, ENSMUSG00000057400, ENSMUSG00000033739, ENSMUSG00000032083, ENSMUSG00000059908, ENSMUSG00000001435, ENSMUSG00000022894, ENSMUSG00000028339, ENSMUSG00000021390, ENSMUSG00000019122, ENSMUSG00000057722, ENSMUSG00000026042,…	216	774	12504	2.01938	0.178464	0.0479568	1.03014
GOTERM_MF_FAT	GO:0008092~cytoskeletal protein binding	18	5.7508	0.000841784	ENSMUSG00000038976, ENSMUSG00000024397, ENSMUSG00000024236, ENSMUSG00000030739, ENSMUSG00000029621, ENSMUSG00000029761, ENSMUSG00000054150, ENSMUSG00000037601, ENSMUSG00000028649, ENSMUSG00000028464, ENSMUSG00000052698, ENSMUSG00000044042, ENSMUSG00000025429, ENSMUSG00000024044, ENSMUSG00000020315, ENSMUSG00000018417, ENSMUSG00000063450, ENSMUSG00000026131	230	414	13288	2.51191	0.315429	0.172612	1.18763
GOTERM_CC_FAT	GO:0005624~membrane fraction	20	6.38978	0.00128555	ENSMUSG00000074254, ENSMUSG00000028955, ENSMUSG00000056035, ENSMUSG00000069456, ENSMUSG00000036833, ENSMUSG00000025809, ENSMUSG00000038489, ENSMUSG00000029761, ENSMUSG00000034485, ENSMUSG00000022206, ENSMUSG00000022822, ENSMUSG00000024924, ENSMUSG00000050541, ENSMUSG00000037601, ENSMUSG00000038541, ENSMUSG00000028713, ENSMUSG00000025429, ENSMUSG00000033792, ENSMUSG00000030671, ENSMUSG00000022899	216	510	12504	2.27015	0.271268	0.0613286	1.65307
INTERPRO	IPR000566:Lipocalin-related protein and Bos/Can/Equ allergen	6	1.91693	0.00111638	ENSMUSG00000019874, ENSMUSG00000066154, ENSMUSG00000028356, ENSMUSG00000062515, ENSMUSG00000024990, ENSMUSG00000078672	287	49	17763	7.57861	0.517266	0.166459	1.65465
GOTERM_CC_FAT	GO:0000267~cell fraction	22	7.02875	0.00144471	ENSMUSG00000074254, ENSMUSG00000028955, ENSMUSG00000056035, ENSMUSG00000069456, ENSMUSG00000036833, ENSMUSG00000025809, ENSMUSG00000038489, ENSMUSG00000029761, ENSMUSG00000034485, ENSMUSG00000022206, ENSMUSG00000022822, ENSMUSG00000024924, ENSMUSG00000050541, ENSMUSG00000025175, ENSMUSG00000037601, ENSMUSG00000038541, ENSMUSG00000028713, ENSMUSG00000025429, ENSMUSG00000033792, ENSMUSG00000032060,…	216	596	12504	2.13684	0.299287	0.0575535	1.85597
INTERPRO	IPR012674:Calycin	6	1.91693	0.0014631	ENSMUSG00000019874, ENSMUSG00000066154, ENSMUSG00000028356, ENSMUSG00000062515, ENSMUSG00000024990, ENSMUSG00000078672	287	52	17763	7.14138	0.61505	0.173808	2.16332
GOTERM_CC_FAT	GO:0043228~non-membrane-bounded organelle	50	15.9744	0.00237438	ENSMUSG00000060678, ENSMUSG00000021413, ENSMUSG00000049327, ENSMUSG00000030739, ENSMUSG00000071415, ENSMUSG00000020076, ENSMUSG00000003038, ENSMUSG00000004268, ENSMUSG00000028649, ENSMUSG00000031393, ENSMUSG00000018102, ENSMUSG00000036438, ENSMUSG00000024397, ENSMUSG00000025785, ENSMUSG00000047193, ENSMUSG00000030744, ENSMUSG00000034485, ENSMUSG00000052698, ENSMUSG00000022090, ENSMUSG00000050621,…	216	1919	12504	1.50831	0.442779	0.0801474	3.03342
GOTERM_CC_FAT	GO:0043232~intracellular non-membrane-bounded organelle	50	15.9744	0.00237438	ENSMUSG00000060678, ENSMUSG00000021413, ENSMUSG00000049327, ENSMUSG00000030739, ENSMUSG00000071415, ENSMUSG00000020076, ENSMUSG00000003038, ENSMUSG00000004268, ENSMUSG00000028649, ENSMUSG00000031393, ENSMUSG00000018102, ENSMUSG00000036438, ENSMUSG00000024397, ENSMUSG00000025785, ENSMUSG00000047193, ENSMUSG00000030744, ENSMUSG00000034485, ENSMUSG00000052698, ENSMUSG00000022090, ENSMUSG00000050621,…	216	1919	12504	1.50831	0.442779	0.0801474	3.03342
GOTERM_CC_FAT	GO:0031012~extracellular matrix	14	4.47284	0.00266898	ENSMUSG00000001435, ENSMUSG00000022894, ENSMUSG00000028339, ENSMUSG00000021390, ENSMUSG00000004098, ENSMUSG00000024421, ENSMUSG00000017344, ENSMUSG00000022868, ENSMUSG00000026042, ENSMUSG00000048368, ENSMUSG00000029675, ENSMUSG00000029368, ENSMUSG00000036585, ENSMUSG00000031954	216	309	12504	2.6228	0.481828	0.0788947	3.40381
INTERPRO	IPR000504:RNA recognition motif, RNP-1	11	3.51438	0.00236869	ENSMUSG00000022973, ENSMUSG00000031107, ENSMUSG00000032582, ENSMUSG00000060373, ENSMUSG00000042625, ENSMUSG00000029328, ENSMUSG00000038374, ENSMUSG00000058655, ENSMUSG00000046434, ENSMUSG00000029402, ENSMUSG00000010362	287	212	17763	3.21138	0.786948	0.227175	3.48035
GOTERM_BP_FAT	GO:0043062~extracellular structure organization	9	2.8754	0.00214192	ENSMUSG00000024527, ENSMUSG00000001435, ENSMUSG00000031393, ENSMUSG00000026042, ENSMUSG00000030774, ENSMUSG00000004098, ENSMUSG00000029675, ENSMUSG00000017344, ENSMUSG00000033792	210	149	13588	3.90834	0.962637	0.962637	3.50902
GOTERM_CC_FAT	GO:0005576~extracellular region	44	14.0575	0.00441459	ENSMUSG00000072849, ENSMUSG00000066154, ENSMUSG00000004098, ENSMUSG00000024421, ENSMUSG00000017344, ENSMUSG00000031465, ENSMUSG00000053846, ENSMUSG00000033831, ENSMUSG00000029767, ENSMUSG00000044258, ENSMUSG00000024990, ENSMUSG00000024924, ENSMUSG00000022868, ENSMUSG00000061780, ENSMUSG00000048368, ENSMUSG00000031722, ENSMUSG00000023046, ENSMUSG00000057400, ENSMUSG00000021765, ENSMUSG00000026200,…	216	1680	12504	1.51614	0.663243	0.113906	5.57184
GOTERM_CC_FAT	GO:0044420~extracellular matrix part	7	2.23642	0.00503744	ENSMUSG00000001435, ENSMUSG00000026042, ENSMUSG00000028339, ENSMUSG00000004098, ENSMUSG00000024421, ENSMUSG00000029368, ENSMUSG00000031954	216	92	12504	4.40459	0.711292	0.116827	6.33448
GOTERM_CC_FAT	GO:0005578~proteinaceous extracellular matrix	13	4.15335	0.00531978	ENSMUSG00000001435, ENSMUSG00000022894, ENSMUSG00000028339, ENSMUSG00000021390, ENSMUSG00000004098, ENSMUSG00000024421, ENSMUSG00000017344, ENSMUSG00000026042, ENSMUSG00000048368, ENSMUSG00000029368, ENSMUSG00000029675, ENSMUSG00000036585, ENSMUSG00000031954	216	297	12504	2.53386	0.730762	0.112447	6.67831
GOTERM_MF_FAT	GO:0005198~structural molecule activity	17	5.43131	0.00497473	ENSMUSG00000001435, ENSMUSG00000028339, ENSMUSG00000004098, ENSMUSG00000041378, ENSMUSG00000071415, ENSMUSG00000030744, ENSMUSG00000026042, ENSMUSG00000052698, ENSMUSG00000028464, ENSMUSG00000029675, ENSMUSG00000050621, ENSMUSG00000032060, ENSMUSG00000024044, ENSMUSG00000063888, ENSMUSG00000020315, ENSMUSG00000079435, ENSMUSG00000049517	230	450	13288	2.18257	0.89399	0.526722	6.83076
GOTERM_CC_FAT	GO:0030864~cortical actin cytoskeleton	4	1.27796	0.00606541	ENSMUSG00000038976, ENSMUSG00000032827, ENSMUSG00000029761, ENSMUSG00000020315	216	22	12504	10.5253	0.776118	0.117256	7.58075
INTERPRO	IPR002048:Calcium-binding EF-hand	8	2.55591	0.00678801	ENSMUSG00000028649, ENSMUSG00000048200, ENSMUSG00000036438, ENSMUSG00000005973, ENSMUSG00000029767, ENSMUSG00000021537, ENSMUSG00000029781, ENSMUSG00000026131	287	137	17763	3.61413	0.988214	0.469752	9.67351
INTERPRO	IPR012677:Nucleotide-binding, alpha-beta plait	10	3.19489	0.00778845	ENSMUSG00000031107, ENSMUSG00000032582, ENSMUSG00000060373, ENSMUSG00000042625, ENSMUSG00000029328, ENSMUSG00000038374, ENSMUSG00000058655, ENSMUSG00000046434, ENSMUSG00000029402, ENSMUSG00000010362	287	213	17763	2.90573	0.993891	0.471252	11.023
GOTERM_BP_FAT	GO:0008064~regulation of actin polymerization or depolymerization	5	1.59744	0.00720835	ENSMUSG00000029675, ENSMUSG00000044042, ENSMUSG00000029621, ENSMUSG00000020315, ENSMUSG00000020120	210	50	13588	6.47048	0.999985	0.996094	11.354
INTERPRO	IPR001589:Actinin-type, actin-binding, conserved site	4	1.27796	0.00816518	ENSMUSG00000028649, ENSMUSG00000020315, ENSMUSG00000026131, ENSMUSG00000063450	287	26	17763	9.52184	0.995231	0.447858	11.5263
GOTERM_BP_FAT	GO:0030832~regulation of actin filament length	5	1.59744	0.00772949	ENSMUSG00000029675, ENSMUSG00000044042, ENSMUSG00000029621, ENSMUSG00000020315, ENSMUSG00000020120	210	51	13588	6.3436	0.999993	0.981034	12.126
GOTERM_BP_FAT	GO:0034754~cellular hormone metabolic process	5	1.59744	0.00827482	ENSMUSG00000038541, ENSMUSG00000031393, ENSMUSG00000069456, ENSMUSG00000024990, ENSMUSG00000032083	210	52	13588	6.22161	0.999997	0.958602	12.9271
GOTERM_CC_FAT	GO:0005792~microsome	9	2.8754	0.0111232	ENSMUSG00000074254, ENSMUSG00000038541, ENSMUSG00000037601, ENSMUSG00000028713, ENSMUSG00000056035, ENSMUSG00000069456, ENSMUSG00000036833, ENSMUSG00000038489, ENSMUSG00000030671	216	176	12504	2.96023	0.936177	0.190764	13.4928
GOTERM_CC_FAT	GO:0042598~vesicular fraction	9	2.8754	0.0134126	ENSMUSG00000074254, ENSMUSG00000038541, ENSMUSG00000037601, ENSMUSG00000028713, ENSMUSG00000056035, ENSMUSG00000069456, ENSMUSG00000036833, ENSMUSG00000038489, ENSMUSG00000030671	216	182	12504	2.86264	0.963913	0.211224	16.0523
GOTERM_MF_FAT	GO:0020037~heme binding	8	2.55591	0.0123709	ENSMUSG00000074254, ENSMUSG00000015224, ENSMUSG00000028713, ENSMUSG00000056035, ENSMUSG00000038489, ENSMUSG00000028356, ENSMUSG00000020810, ENSMUSG00000030895	230	144	13288	3.20966	0.996308	0.753502	16.1885
GOTERM_CC_FAT	GO:0005615~extracellular space	17	5.43131	0.0152397	ENSMUSG00000059908, ENSMUSG00000017344, ENSMUSG00000019122, ENSMUSG00000033831, ENSMUSG00000024990, ENSMUSG00000024924, ENSMUSG00000057722, ENSMUSG00000061780, ENSMUSG00000022868, ENSMUSG00000022875, ENSMUSG00000024713, ENSMUSG00000029368, ENSMUSG00000057400, ENSMUSG00000036585, ENSMUSG00000033739, ENSMUSG00000032083, ENSMUSG00000038508	216	511	12504	1.92585	0.977127	0.222642	18.0446
GOTERM_BP_FAT	GO:0044087~regulation of cellular component biogenesis	6	1.91693	0.0120037	ENSMUSG00000031393, ENSMUSG00000029675, ENSMUSG00000044042, ENSMUSG00000029621, ENSMUSG00000020315, ENSMUSG00000020120	210	89	13588	4.36212	1	0.975341	18.2235
GOTERM_MF_FAT	GO:0005201~extracellular matrix structural constituent	4	1.27796	0.0145577	ENSMUSG00000001435, ENSMUSG00000026042, ENSMUSG00000004098, ENSMUSG00000029675	230	30	13288	7.70319	0.998638	0.732818	18.7832
GOTERM_BP_FAT	GO:0042445~hormone metabolic process	6	1.91693	0.0125553	ENSMUSG00000038541, ENSMUSG00000031393, ENSMUSG00000069456, ENSMUSG00000024713, ENSMUSG00000024990, ENSMUSG00000032083	210	90	13588	4.31365	1	0.960371	18.9808
GOTERM_MF_FAT	GO:0046906~tetrapyrrole binding	8	2.55591	0.0157159	ENSMUSG00000074254, ENSMUSG00000015224, ENSMUSG00000028713, ENSMUSG00000056035, ENSMUSG00000038489, ENSMUSG00000028356, ENSMUSG00000020810, ENSMUSG00000030895	230	151	13288	3.06087	0.999198	0.695186	20.127
GOTERM_BP_FAT	GO:0032956~regulation of actin cytoskeleton organization	5	1.59744	0.0135577	ENSMUSG00000029675, ENSMUSG00000044042, ENSMUSG00000029621, ENSMUSG00000020315, ENSMUSG00000020120	210	60	13588	5.39206	1	0.949685	20.3402
GOTERM_BP_FAT	GO:0032970~regulation of actin filament-based process	5	1.59744	0.0143388	ENSMUSG00000029675, ENSMUSG00000044042, ENSMUSG00000029621, ENSMUSG00000020315, ENSMUSG00000020120	210	61	13588	5.30367	1	0.937185	21.3845
GOTERM_BP_FAT	GO:0042325~regulation of phosphorylation	11	3.51438	0.0143768	ENSMUSG00000000276, ENSMUSG00000038976, ENSMUSG00000033792, ENSMUSG00000033721, ENSMUSG00000036585, ENSMUSG00000062515, ENSMUSG00000030895, ENSMUSG00000024924, ENSMUSG00000004221, ENSMUSG00000032083, ENSMUSG00000030983	210	290	13588	2.45432	1	0.91513	21.435
INTERPRO	IPR018249:EF-HAND 2	9	2.8754	0.0183057	ENSMUSG00000028649, ENSMUSG00000048200, ENSMUSG00000024397, ENSMUSG00000036438, ENSMUSG00000005973, ENSMUSG00000029767, ENSMUSG00000021537, ENSMUSG00000029781, ENSMUSG00000026131	287	205	17763	2.71721	0.999994	0.700186	24.1164
KEGG_PATHWAY	mmu04510:Focal adhesion	9	2.8754	0.0239874	ENSMUSG00000026042, ENSMUSG00000052698, ENSMUSG00000030774, ENSMUSG00000004098, ENSMUSG00000024421, ENSMUSG00000017344, ENSMUSG00000025809, ENSMUSG00000033721, ENSMUSG00000006134	103	198	5738	2.53222	0.941617	0.758375	24.2277
GOTERM_CC_FAT	GO:0005938~cell cortex	7	2.23642	0.0216065	ENSMUSG00000028649, ENSMUSG00000038976, ENSMUSG00000033831, ENSMUSG00000032827, ENSMUSG00000029761, ENSMUSG00000020315, ENSMUSG00000050379	216	126	12504	3.21605	0.995362	0.285264	24.6515
GOTERM_BP_FAT	GO:0043254~regulation of protein complex assembly	5	1.59744	0.0177455	ENSMUSG00000029675, ENSMUSG00000044042, ENSMUSG00000029621, ENSMUSG00000020315, ENSMUSG00000020120	210	65	13588	4.97729	1	0.935739	25.7905
GOTERM_BP_FAT	GO:0051174~regulation of phosphorus metabolic process	11	3.51438	0.0181737	ENSMUSG00000000276, ENSMUSG00000038976, ENSMUSG00000033792, ENSMUSG00000033721, ENSMUSG00000036585, ENSMUSG00000062515, ENSMUSG00000030895, ENSMUSG00000024924, ENSMUSG00000004221, ENSMUSG00000032083, ENSMUSG00000030983	210	301	13588	2.36463	1	0.922389	26.3276
GOTERM_BP_FAT	GO:0019220~regulation of phosphate metabolic process	11	3.51438	0.0181737	ENSMUSG00000000276, ENSMUSG00000038976, ENSMUSG00000033792, ENSMUSG00000033721, ENSMUSG00000036585, ENSMUSG00000062515, ENSMUSG00000030895, ENSMUSG00000024924, ENSMUSG00000004221, ENSMUSG00000032083, ENSMUSG00000030983	210	301	13588	2.36463	1	0.922389	26.3276
GOTERM_BP_FAT	GO:0051493~regulation of cytoskeleton organization	6	1.91693	0.0183074	ENSMUSG00000029675, ENSMUSG00000044042, ENSMUSG00000029621, ENSMUSG00000020315, ENSMUSG00000026131, ENSMUSG00000020120	210	99	13588	3.9215	1	0.905622	26.4946
GOTERM_MF_FAT	GO:0003755~peptidyl-prolyl cis-trans isomerase activity	4	1.27796	0.0220433	ENSMUSG00000032525, ENSMUSG00000029781, ENSMUSG00000024222, ENSMUSG00000079480	230	35	13288	6.60273	0.999956	0.76139	27.1106
GOTERM_BP_FAT	GO:0030029~actin filament-based process	8	2.55591	0.0191554	ENSMUSG00000038976, ENSMUSG00000024397, ENSMUSG00000029675, ENSMUSG00000044042, ENSMUSG00000032827, ENSMUSG00000030739, ENSMUSG00000025809, ENSMUSG00000024044	210	176	13588	2.94113	1	0.897796	27.5453
GOTERM_BP_FAT	GO:0030198~extracellular matrix organization	6	1.91693	0.019787	ENSMUSG00000001435, ENSMUSG00000026042, ENSMUSG00000004098, ENSMUSG00000029675, ENSMUSG00000017344, ENSMUSG00000033792	210	101	13588	3.84385	1	0.887903	28.3185
INTERPRO	IPR001715:Calponin-like actin-binding	5	1.59744	0.0239756	ENSMUSG00000028649, ENSMUSG00000033721, ENSMUSG00000020315, ENSMUSG00000026131, ENSMUSG00000063450	287	68	17763	4.55088	1	0.762696	30.4059
GOTERM_MF_FAT	GO:0016859~cis-trans isomerase activity	4	1.27796	0.0255237	ENSMUSG00000032525, ENSMUSG00000029781, ENSMUSG00000024222, ENSMUSG00000079480	230	37	13288	6.24583	0.999991	0.766447	30.7055
GOTERM_BP_FAT	GO:0016358~dendrite development	4	1.27796	0.0218366	ENSMUSG00000031393, ENSMUSG00000038976, ENSMUSG00000030774, ENSMUSG00000033792	210	39	13588	6.63639	1	0.895277	30.7751
GOTERM_BP_FAT	GO:0045137~development of primary sexual characteristics	6	1.91693	0.0221499	ENSMUSG00000038541, ENSMUSG00000026311, ENSMUSG00000022868, ENSMUSG00000021765, ENSMUSG00000024990, ENSMUSG00000057722	210	104	13588	3.73297	1	0.88306	31.1435
GOTERM_BP_FAT	GO:0050817~coagulation	5	1.59744	0.0226593	ENSMUSG00000022875, ENSMUSG00000033831, ENSMUSG00000027249, ENSMUSG00000020120, ENSMUSG00000031444	210	70	13588	4.62177	1	0.873415	31.7386
GOTERM_BP_FAT	GO:0007596~blood coagulation	5	1.59744	0.0226593	ENSMUSG00000022875, ENSMUSG00000033831, ENSMUSG00000027249, ENSMUSG00000020120, ENSMUSG00000031444	210	70	13588	4.62177	1	0.873415	31.7386
GOTERM_MF_FAT	GO:0015293~symporter activity	7	2.23642	0.026723	ENSMUSG00000028976, ENSMUSG00000021335, ENSMUSG00000037762, ENSMUSG00000017756, ENSMUSG00000022899, ENSMUSG00000020334, ENSMUSG00000030096	230	132	13288	3.06377	0.999995	0.741879	31.9057
GOTERM_BP_FAT	GO:0009719~response to endogenous stimulus	8	2.55591	0.0237023	ENSMUSG00000038541, ENSMUSG00000022868, ENSMUSG00000072849, ENSMUSG00000062515, ENSMUSG00000024990, ENSMUSG00000030671, ENSMUSG00000057722, ENSMUSG00000050541	210	184	13588	2.81325	1	0.870355	32.9421
GOTERM_BP_FAT	GO:0007599~hemostasis	5	1.59744	0.0237317	ENSMUSG00000022875, ENSMUSG00000033831, ENSMUSG00000027249, ENSMUSG00000020120, ENSMUSG00000031444	210	71	13588	4.55667	1	0.855988	32.9757
GOTERM_BP_FAT	GO:0030168~platelet activation	3	0.958466	0.0245211	ENSMUSG00000033831, ENSMUSG00000027249, ENSMUSG00000020120	210	16	13588	12.1321	1	0.850875	33.8729
GOTERM_CC_FAT	GO:0070013~intracellular organelle lumen	29	9.26518	0.0320565	ENSMUSG00000069456, ENSMUSG00000029767, ENSMUSG00000038489, ENSMUSG00000071415, ENSMUSG00000018697, ENSMUSG00000040945, ENSMUSG00000018068, ENSMUSG00000020076, ENSMUSG00000029781, ENSMUSG00000020914, ENSMUSG00000020248, ENSMUSG00000004268, ENSMUSG00000037470, ENSMUSG00000022109, ENSMUSG00000057400, ENSMUSG00000026803, ENSMUSG00000031314, ENSMUSG00000042406, ENSMUSG00000010362, ENSMUSG00000024218,…	216	1133	12504	1.48171	0.99967	0.375918	34.4391
GOTERM_CC_FAT	GO:0043233~organelle lumen	29	9.26518	0.0330099	ENSMUSG00000069456, ENSMUSG00000029767, ENSMUSG00000038489, ENSMUSG00000071415, ENSMUSG00000018697, ENSMUSG00000040945, ENSMUSG00000018068, ENSMUSG00000020076, ENSMUSG00000029781, ENSMUSG00000020914, ENSMUSG00000020248, ENSMUSG00000004268, ENSMUSG00000037470, ENSMUSG00000022109, ENSMUSG00000057400, ENSMUSG00000026803, ENSMUSG00000031314, ENSMUSG00000042406, ENSMUSG00000010362, ENSMUSG00000024218,…	216	1136	12504	1.4778	0.999741	0.367926	35.271
INTERPRO	IPR011992:EF-Hand type	9	2.8754	0.0311882	ENSMUSG00000028649, ENSMUSG00000048200, ENSMUSG00000024397, ENSMUSG00000036438, ENSMUSG00000005973, ENSMUSG00000029767, ENSMUSG00000021537, ENSMUSG00000029781, ENSMUSG00000026131	287	227	17763	2.45387	1	0.821211	37.7047
GOTERM_MF_FAT	GO:0030414~peptidase inhibitor activity	8	2.55591	0.0330513	ENSMUSG00000059908, ENSMUSG00000022868, ENSMUSG00000072849, ENSMUSG00000060147, ENSMUSG00000022875, ENSMUSG00000029535, ENSMUSG00000028356, ENSMUSG00000069792	230	176	13288	2.62609	1	0.779629	37.9247
INTERPRO	IPR010515:Collagenase NC10 and endostatin	2	0.638978	0.0319434	ENSMUSG00000001435, ENSMUSG00000028339	287	2	17763	61.892	1	0.803724	38.4261
GOTERM_CC_FAT	GO:0005604~basement membrane	5	1.59744	0.0368622	ENSMUSG00000001435, ENSMUSG00000028339, ENSMUSG00000024421, ENSMUSG00000029368, ENSMUSG00000031954	216	73	12504	3.96499	0.999903	0.385095	38.534
GOTERM_CC_FAT	GO:0044448~cell cortex part	5	1.59744	0.0368622	ENSMUSG00000038976, ENSMUSG00000032827, ENSMUSG00000029761, ENSMUSG00000020315, ENSMUSG00000050379	216	73	12504	3.96499	0.999903	0.385095	38.534
GOTERM_BP_FAT	GO:0007010~cytoskeleton organization	11	3.51438	0.0291977	ENSMUSG00000038976, ENSMUSG00000052698, ENSMUSG00000024397, ENSMUSG00000029675, ENSMUSG00000025429, ENSMUSG00000044042, ENSMUSG00000032827, ENSMUSG00000024236, ENSMUSG00000025809, ENSMUSG00000024044, ENSMUSG00000026131	210	326	13588	2.18329	1	0.88504	38.9606
GOTERM_CC_FAT	GO:0030863~cortical cytoskeleton	4	1.27796	0.037393	ENSMUSG00000038976, ENSMUSG00000032827, ENSMUSG00000029761, ENSMUSG00000020315	216	43	12504	5.38501	0.999915	0.374219	38.9716
GOTERM_BP_FAT	GO:0042985~negative regulation of amyloid precursor protein biosynthetic process	2	0.638978	0.030527	ENSMUSG00000040605, ENSMUSG00000018697	210	2	13588	64.7048	1	0.884712	40.338
GOTERM_BP_FAT	GO:0010561~negative regulation of glycoprotein biosynthetic process	2	0.638978	0.030527	ENSMUSG00000040605, ENSMUSG00000018697	210	2	13588	64.7048	1	0.884712	40.338
GOTERM_BP_FAT	GO:0030833~regulation of actin filament polymerization	4	1.27796	0.0317197	ENSMUSG00000029675, ENSMUSG00000044042, ENSMUSG00000029621, ENSMUSG00000020315	210	45	13588	5.75153	1	0.883335	41.5492
GOTERM_BP_FAT	GO:0033043~regulation of organelle organization	7	2.23642	0.0317855	ENSMUSG00000031393, ENSMUSG00000029675, ENSMUSG00000044042, ENSMUSG00000029621, ENSMUSG00000020315, ENSMUSG00000026131, ENSMUSG00000020120	210	154	13588	2.94113	1	0.872962	41.6153
INTERPRO	IPR001791:Laminin G	4	1.27796	0.0356711	ENSMUSG00000001435, ENSMUSG00000028339, ENSMUSG00000004098, ENSMUSG00000024421	287	45	17763	5.50151	1	0.815777	41.8743
GOTERM_CC_FAT	GO:0005730~nucleolus	11	3.51438	0.0419199	ENSMUSG00000025785, ENSMUSG00000071415, ENSMUSG00000026803, ENSMUSG00000018697, ENSMUSG00000040945, ENSMUSG00000020076, ENSMUSG00000031843, ENSMUSG00000020914, ENSMUSG00000079480, ENSMUSG00000010362, ENSMUSG00000004268	216	310	12504	2.05412	0.999973	0.39447	42.5877
INTERPRO	IPR002345:Lipocalin	4	1.27796	0.0377193	ENSMUSG00000066154, ENSMUSG00000028356, ENSMUSG00000024990, ENSMUSG00000078672	287	46	17763	5.38191	1	0.811988	43.6913
GOTERM_MF_FAT	GO:0016712~oxidoreductase activity, acting on paired donors, with incorporation or reduction of molecular oxygen, reduced flavin or flavoprotein as one donor, and incorporation of one atom of oxygen	4	1.27796	0.0398787	ENSMUSG00000074254, ENSMUSG00000015224, ENSMUSG00000028713, ENSMUSG00000056035	230	44	13288	5.25217	1	0.810776	43.8615
GOTERM_BP_FAT	GO:0006576~biogenic amine metabolic process	5	1.59744	0.034765	ENSMUSG00000031393, ENSMUSG00000036833, ENSMUSG00000033792, ENSMUSG00000025464, ENSMUSG00000020334	210	80	13588	4.04405	1	0.885791	44.5374
INTERPRO	IPR001179:Peptidyl-prolyl cis-trans isomerase, FKBP-type	3	0.958466	0.0405622	ENSMUSG00000029781, ENSMUSG00000024222, ENSMUSG00000033739	287	20	17763	9.2838	1	0.814994	46.1257
GOTERM_CC_FAT	GO:0044432~endoplasmic reticulum part	9	2.8754	0.046625	ENSMUSG00000037470, ENSMUSG00000069456, ENSMUSG00000069922, ENSMUSG00000036833, ENSMUSG00000005973, ENSMUSG00000029767, ENSMUSG00000057400, ENSMUSG00000029781, ENSMUSG00000026047	216	231	12504	2.25541	0.999992	0.413685	46.1358
GOTERM_CC_FAT	GO:0001726~ruffle	4	1.27796	0.0467638	ENSMUSG00000052698, ENSMUSG00000024397, ENSMUSG00000048232, ENSMUSG00000018001	216	47	12504	4.92671	0.999992	0.40085	46.2374
KEGG_PATHWAY	mmu00983:Drug metabolism	4	1.27796	0.053032	ENSMUSG00000074254, ENSMUSG00000056035, ENSMUSG00000069922, ENSMUSG00000057400	103	48	5738	4.64239	0.998297	0.88058	46.3474
GOTERM_CC_FAT	GO:0031974~membrane-enclosed lumen	29	9.26518	0.0470506	ENSMUSG00000069456, ENSMUSG00000029767, ENSMUSG00000038489, ENSMUSG00000071415, ENSMUSG00000018697, ENSMUSG00000040945, ENSMUSG00000018068, ENSMUSG00000020076, ENSMUSG00000029781, ENSMUSG00000020914, ENSMUSG00000020248, ENSMUSG00000004268, ENSMUSG00000037470, ENSMUSG00000022109, ENSMUSG00000057400, ENSMUSG00000026803, ENSMUSG00000031314, ENSMUSG00000042406, ENSMUSG00000010362, ENSMUSG00000024218,…	216	1174	12504	1.42996	0.999993	0.389809	46.4466
INTERPRO	IPR017973:Cytochrome P450, C-terminal region	5	1.59744	0.0417469	ENSMUSG00000074254, ENSMUSG00000015224, ENSMUSG00000028713, ENSMUSG00000056035, ENSMUSG00000038489	287	81	17763	3.82049	1	0.805144	47.1108
INTERPRO	IPR008160:Collagen triple helix repeat	5	1.59744	0.0417469	ENSMUSG00000001435, ENSMUSG00000026042, ENSMUSG00000028339, ENSMUSG00000004098, ENSMUSG00000036103	287	81	17763	3.82049	1	0.805144	47.1108
GOTERM_BP_FAT	GO:0008202~steroid metabolic process	7	2.23642	0.03822	ENSMUSG00000021210, ENSMUSG00000038541, ENSMUSG00000031393, ENSMUSG00000024924, ENSMUSG00000063730, ENSMUSG00000057722, ENSMUSG00000032083	210	161	13588	2.81325	1	0.899511	47.7535
GOTERM_BP_FAT	GO:0032535~regulation of cellular component size	7	2.23642	0.03822	ENSMUSG00000022868, ENSMUSG00000029675, ENSMUSG00000044042, ENSMUSG00000029621, ENSMUSG00000020315, ENSMUSG00000050541, ENSMUSG00000020120	210	161	13588	2.81325	1	0.899511	47.7535
GOTERM_CC_FAT	GO:0030017~sarcomere	5	1.59744	0.0488939	ENSMUSG00000041891, ENSMUSG00000028464, ENSMUSG00000032060, ENSMUSG00000020315, ENSMUSG00000063450	216	80	12504	3.61806	0.999996	0.389377	47.7735
INTERPRO	IPR003129:Laminin G, thrombospondin-type, N-terminal	3	0.958466	0.0443655	ENSMUSG00000001435, ENSMUSG00000028339, ENSMUSG00000004098	287	21	17763	8.84171	1	0.806747	49.229
KEGG_PATHWAY	mmu04512:ECM-receptor interaction	5	1.59744	0.0595599	ENSMUSG00000026042, ENSMUSG00000004098, ENSMUSG00000024421, ENSMUSG00000017344, ENSMUSG00000025809	103	83	5738	3.35595	0.999242	0.834066	50.425
GOTERM_BP_FAT	GO:0009725~response to hormone stimulus	7	2.23642	0.0422696	ENSMUSG00000038541, ENSMUSG00000022868, ENSMUSG00000072849, ENSMUSG00000062515, ENSMUSG00000024990, ENSMUSG00000030671, ENSMUSG00000057722	210	165	13588	2.74505	1	0.913894	51.2999
GOTERM_BP_FAT	GO:0030036~actin cytoskeleton organization	7	2.23642	0.0422696	ENSMUSG00000038976, ENSMUSG00000024397, ENSMUSG00000029675, ENSMUSG00000044042, ENSMUSG00000032827, ENSMUSG00000025809, ENSMUSG00000024044	210	165	13588	2.74505	1	0.913894	51.2999
GOTERM_MF_FAT	GO:0008034~lipoprotein binding	3	0.958466	0.0500929	ENSMUSG00000036103, ENSMUSG00000024924, ENSMUSG00000032083	230	21	13288	8.25342	1	0.85444	51.7649
GOTERM_BP_FAT	GO:0051657~maintenance of organelle location	2	0.638978	0.0454408	ENSMUSG00000029368, ENSMUSG00000032199	210	3	13588	43.1365	1	0.92162	53.9177
GOTERM_BP_FAT	GO:0042984~regulation of amyloid precursor protein biosynthetic process	2	0.638978	0.0454408	ENSMUSG00000040605, ENSMUSG00000018697	210	3	13588	43.1365	1	0.92162	53.9177
INTERPRO	IPR001128:Cytochrome P450	5	1.59744	0.0519048	ENSMUSG00000074254, ENSMUSG00000015224, ENSMUSG00000028713, ENSMUSG00000056035, ENSMUSG00000038489	287	87	17763	3.55701	1	0.839433	54.8941
GOTERM_MF_FAT	GO:0008201~heparin binding	5	1.59744	0.0550452	ENSMUSG00000004098, ENSMUSG00000017344, ENSMUSG00000053846, ENSMUSG00000029103, ENSMUSG00000036585	230	83	13288	3.48036	1	0.859122	55.2125
GOTERM_CC_FAT	GO:0044449~contractile fiber part	5	1.59744	0.0607324	ENSMUSG00000041891, ENSMUSG00000028464, ENSMUSG00000032060, ENSMUSG00000020315, ENSMUSG00000063450	216	86	12504	3.36563	1	0.447229	55.5978
GOTERM_BP_FAT	GO:0010817~regulation of hormone levels	6	1.91693	0.0476741	ENSMUSG00000038541, ENSMUSG00000031393, ENSMUSG00000069456, ENSMUSG00000024713, ENSMUSG00000024990, ENSMUSG00000032083	210	128	13588	3.03304	1	0.924393	55.6813
GOTERM_BP_FAT	GO:0046546~development of primary male sexual characteristics	4	1.27796	0.0479382	ENSMUSG00000038541, ENSMUSG00000026311, ENSMUSG00000022868, ENSMUSG00000024990	210	53	13588	4.88338	1	0.918756	55.8856
GOTERM_BP_FAT	GO:0048806~genitalia development	3	0.958466	0.0482064	ENSMUSG00000038541, ENSMUSG00000026311, ENSMUSG00000024990	210	23	13588	8.43975	1	0.913123	56.0922
GOTERM_BP_FAT	GO:0050878~regulation of body fluid levels	5	1.59744	0.0483281	ENSMUSG00000022875, ENSMUSG00000033831, ENSMUSG00000027249, ENSMUSG00000020120, ENSMUSG00000031444	210	89	13588	3.6351	1	0.906802	56.1856
INTERPRO	IPR017972:Cytochrome P450, conserved site	5	1.59744	0.0555645	ENSMUSG00000074254, ENSMUSG00000015224, ENSMUSG00000028713, ENSMUSG00000056035, ENSMUSG00000038489	287	89	17763	3.47708	1	0.844898	57.426
GOTERM_BP_FAT	GO:0007548~sex differentiation	6	1.91693	0.0503552	ENSMUSG00000038541, ENSMUSG00000026311, ENSMUSG00000022868, ENSMUSG00000021765, ENSMUSG00000024990, ENSMUSG00000057722	210	130	13588	2.98637	1	0.909298	57.7147
KEGG_PATHWAY	mmu03010:Ribosome	5	1.59744	0.073121	ENSMUSG00000071415, ENSMUSG00000050621, ENSMUSG00000030744, ENSMUSG00000079435, ENSMUSG00000049517	103	89	5738	3.1297	0.999861	0.830824	58.0064
GOTERM_MF_FAT	GO:0004866~endopeptidase inhibitor activity	7	2.23642	0.0601129	ENSMUSG00000059908, ENSMUSG00000022868, ENSMUSG00000072849, ENSMUSG00000060147, ENSMUSG00000022875, ENSMUSG00000029535, ENSMUSG00000028356	230	161	13288	2.51191	1	0.863675	58.5022
GOTERM_BP_FAT	GO:0031175~neuron projection development	8	2.55591	0.0516731	ENSMUSG00000024527, ENSMUSG00000031393, ENSMUSG00000038976, ENSMUSG00000030774, ENSMUSG00000028289, ENSMUSG00000032827, ENSMUSG00000033792, ENSMUSG00000026131	210	218	13588	2.37449	1	0.908572	58.6817
GOTERM_BP_FAT	GO:0007015~actin filament organization	4	1.27796	0.0548854	ENSMUSG00000038976, ENSMUSG00000024397, ENSMUSG00000029675, ENSMUSG00000032827	210	56	13588	4.62177	1	0.915624	60.9525
GOTERM_BP_FAT	GO:0051651~maintenance of location in cell	3	0.958466	0.0560375	ENSMUSG00000052698, ENSMUSG00000029368, ENSMUSG00000032199	210	25	13588	7.76457	1	0.9142	61.7379
GOTERM_CC_FAT	GO:0016591~DNA-directed RNA polymerase II, holoenzyme	4	1.27796	0.0715863	ENSMUSG00000024218, ENSMUSG00000038489, ENSMUSG00000031314, ENSMUSG00000018068	216	56	12504	4.13492	1	0.491736	61.806
INTERPRO	IPR018248:EF hand	6	1.91693	0.0624139	ENSMUSG00000028649, ENSMUSG00000036438, ENSMUSG00000005973, ENSMUSG00000029767, ENSMUSG00000021537, ENSMUSG00000026131	287	132	17763	2.81327	1	0.864789	61.8121
GOTERM_CC_FAT	GO:0030016~myofibril	5	1.59744	0.0716536	ENSMUSG00000041891, ENSMUSG00000028464, ENSMUSG00000032060, ENSMUSG00000020315, ENSMUSG00000063450	216	91	12504	3.18071	1	0.479633	61.8419
GOTERM_CC_FAT	GO:0005856~cytoskeleton	27	8.6262	0.0719104	ENSMUSG00000030739, ENSMUSG00000021537, ENSMUSG00000029761, ENSMUSG00000040945, ENSMUSG00000024991, ENSMUSG00000050379, ENSMUSG00000037601, ENSMUSG00000028649, ENSMUSG00000028464, ENSMUSG00000036438, ENSMUSG00000025429, ENSMUSG00000044042, ENSMUSG00000020315, ENSMUSG00000018417, ENSMUSG00000026131, ENSMUSG00000038976, ENSMUSG00000024397, ENSMUSG00000024236, ENSMUSG00000029621, ENSMUSG00000047193,…	216	1122	12504	1.39305	1	0.469026	61.9784
INTERPRO	IPR012315:Klarsicht/ANC-1/syne-1 homology	2	0.638978	0.0628699	ENSMUSG00000063450, ENSMUSG00000054150	287	4	17763	30.946	1	0.854034	62.0886
GOTERM_BP_FAT	GO:0046661~male sex differentiation	4	1.27796	0.0573024	ENSMUSG00000038541, ENSMUSG00000026311, ENSMUSG00000022868, ENSMUSG00000024990	210	57	13588	4.54069	1	0.913267	62.5832
GOTERM_BP_FAT	GO:0032271~regulation of protein polymerization	4	1.27796	0.0573024	ENSMUSG00000029675, ENSMUSG00000044042, ENSMUSG00000029621, ENSMUSG00000020315	210	57	13588	4.54069	1	0.913267	62.5832
GOTERM_BP_FAT	GO:0030030~cell projection organization	10	3.19489	0.0584562	ENSMUSG00000024527, ENSMUSG00000031393, ENSMUSG00000038976, ENSMUSG00000030774, ENSMUSG00000028289, ENSMUSG00000032827, ENSMUSG00000033792, ENSMUSG00000033721, ENSMUSG00000047193, ENSMUSG00000026131	210	319	13588	2.02836	1	0.911962	63.3388
GOTERM_BP_FAT	GO:0006412~translation	10	3.19489	0.0584562	ENSMUSG00000067194, ENSMUSG00000071415, ENSMUSG00000050621, ENSMUSG00000063888, ENSMUSG00000030744, ENSMUSG00000024991, ENSMUSG00000058655, ENSMUSG00000022884, ENSMUSG00000079435, ENSMUSG00000049517	210	319	13588	2.02836	1	0.911962	63.3388
GOTERM_BP_FAT	GO:0043434~response to peptide hormone stimulus	5	1.59744	0.0587781	ENSMUSG00000038541, ENSMUSG00000022868, ENSMUSG00000072849, ENSMUSG00000024990, ENSMUSG00000030671	210	95	13588	3.40551	1	0.907553	63.547
GOTERM_BP_FAT	GO:0010559~regulation of glycoprotein biosynthetic process	2	0.638978	0.0601264	ENSMUSG00000040605, ENSMUSG00000018697	210	4	13588	32.3524	1	0.907127	64.4072
GOTERM_BP_FAT	GO:0051604~protein maturation	5	1.59744	0.0606281	ENSMUSG00000061780, ENSMUSG00000024713, ENSMUSG00000028356, ENSMUSG00000047193, ENSMUSG00000038521	210	96	13588	3.37004	1	0.903531	64.7225
GOTERM_MF_FAT	GO:0003723~RNA binding	18	5.7508	0.0730334	ENSMUSG00000025785, ENSMUSG00000060373, ENSMUSG00000067194, ENSMUSG00000042625, ENSMUSG00000038374, ENSMUSG00000029328, ENSMUSG00000020076, ENSMUSG00000030744, ENSMUSG00000052776, ENSMUSG00000029402, ENSMUSG00000022884, ENSMUSG00000031393, ENSMUSG00000022973, ENSMUSG00000031107, ENSMUSG00000078427, ENSMUSG00000046434, ENSMUSG00000058655, ENSMUSG00000010362	230	672	13288	1.54752	1	0.897217	65.9012
KEGG_PATHWAY	mmu04810:Regulation of actin cytoskeleton	8	2.55591	0.0904824	ENSMUSG00000030774, ENSMUSG00000030739, ENSMUSG00000025809, ENSMUSG00000029621, ENSMUSG00000033721, ENSMUSG00000036585, ENSMUSG00000027249, ENSMUSG00000006134	103	217	5738	2.05378	0.999985	0.842668	66.1664
KEGG_PATHWAY	mmu00240:Pyrimidine metabolism	5	1.59744	0.0907549	ENSMUSG00000037601, ENSMUSG00000027203, ENSMUSG00000035834, ENSMUSG00000038489, ENSMUSG00000022292	103	96	5738	2.9015	0.999985	0.796117	66.2821
GOTERM_CC_FAT	GO:0043292~contractile fiber	5	1.59744	0.0810634	ENSMUSG00000041891, ENSMUSG00000028464, ENSMUSG00000032060, ENSMUSG00000020315, ENSMUSG00000063450	216	95	12504	3.04678	1	0.500033	66.5609
GOTERM_BP_FAT	GO:0006575~cellular amino acid derivative metabolic process	6	1.91693	0.0666576	ENSMUSG00000027597, ENSMUSG00000031393, ENSMUSG00000036833, ENSMUSG00000033792, ENSMUSG00000025464, ENSMUSG00000020334	210	141	13588	2.75339	1	0.91937	68.3109
GOTERM_CC_FAT	GO:0005783~endoplasmic reticulum	21	6.70927	0.0851675	ENSMUSG00000074254, ENSMUSG00000056035, ENSMUSG00000069456, ENSMUSG00000074093, ENSMUSG00000069922, ENSMUSG00000036833, ENSMUSG00000005973, ENSMUSG00000029767, ENSMUSG00000038489, ENSMUSG00000029781, ENSMUSG00000063730, ENSMUSG00000041891, ENSMUSG00000038541, ENSMUSG00000028713, ENSMUSG00000037470, ENSMUSG00000030968, ENSMUSG00000040605, ENSMUSG00000029103, ENSMUSG00000057400, ENSMUSG00000030671,…	216	838	12504	1.45068	1	0.506569	68.4453
GOTERM_BP_FAT	GO:0048584~positive regulation of response to stimulus	7	2.23642	0.067721	ENSMUSG00000061780, ENSMUSG00000035834, ENSMUSG00000030124, ENSMUSG00000029368, ENSMUSG00000062515, ENSMUSG00000038521, ENSMUSG00000030895	210	186	13588	2.43513	1	0.917913	68.907
INTERPRO	IPR009072:Histone-fold	4	1.27796	0.0752276	ENSMUSG00000018102, ENSMUSG00000060678, ENSMUSG00000024218, ENSMUSG00000067455, ENSMUSG00000020248	287	61	17763	4.05849	1	0.891066	68.9074
GOTERM_BP_FAT	GO:0009314~response to radiation	6	1.91693	0.0699036	ENSMUSG00000031393, ENSMUSG00000024990, ENSMUSG00000034485, ENSMUSG00000050541, ENSMUSG00000030322, ENSMUSG00000026162	210	143	13588	2.71489	1	0.919927	70.0977
GOTERM_BP_FAT	GO:0043086~negative regulation of catalytic activity	5	1.59744	0.0703353	ENSMUSG00000033792, ENSMUSG00000062515, ENSMUSG00000022206, ENSMUSG00000057722, ENSMUSG00000032083	210	101	13588	3.20321	1	0.916635	70.3281
GOTERM_BP_FAT	GO:0032101~regulation of response to external stimulus	5	1.59744	0.0744287	ENSMUSG00000022868, ENSMUSG00000019874, ENSMUSG00000062515, ENSMUSG00000034485, ENSMUSG00000020120	210	103	13588	3.14101	1	0.924042	72.4311
GOTERM_BP_FAT	GO:0005996~monosaccharide metabolic process	7	2.23642	0.0745323	ENSMUSG00000025175, ENSMUSG00000031387, ENSMUSG00000024990, ENSMUSG00000038372, ENSMUSG00000042406, ENSMUSG00000003865, ENSMUSG00000038871	210	191	13588	2.37138	1	0.920053	72.4825
GOTERM_MF_FAT	GO:0005507~copper ion binding	4	1.27796	0.0879336	ENSMUSG00000027597, ENSMUSG00000025193, ENSMUSG00000029368, ENSMUSG00000033792	230	61	13288	3.78845	1	0.924882	72.9045
GOTERM_MF_FAT	GO:0016229~steroid dehydrogenase activity	3	0.958466	0.0886262	ENSMUSG00000021210, ENSMUSG00000038541, ENSMUSG00000063730	230	29	13288	5.97661	1	0.914268	73.195
GOTERM_MF_FAT	GO:0005200~structural constituent of cytoskeleton	3	0.958466	0.0886262	ENSMUSG00000052698, ENSMUSG00000028464, ENSMUSG00000020315	230	29	13288	5.97661	1	0.914268	73.195
GOTERM_MF_FAT	GO:0003743~translation initiation factor activity	4	1.27796	0.091286	ENSMUSG00000067194, ENSMUSG00000024991, ENSMUSG00000058655, ENSMUSG00000022884	230	62	13288	3.72735	1	0.908656	74.2837
GOTERM_BP_FAT	GO:0009310~amine catabolic process	4	1.27796	0.078381	ENSMUSG00000027597, ENSMUSG00000034424, ENSMUSG00000030826, ENSMUSG00000025464	210	65	13588	3.98183	1	0.926233	74.328
GOTERM_BP_FAT	GO:0065003~macromolecular complex assembly	10	3.19489	0.0785096	ENSMUSG00000030774, ENSMUSG00000018102, ENSMUSG00000060678, ENSMUSG00000025001, ENSMUSG00000024218, ENSMUSG00000022973, ENSMUSG00000033831, ENSMUSG00000067455, ENSMUSG00000026803, ENSMUSG00000031314, ENSMUSG00000024991	210	338	13588	1.91434	1	0.922541	74.3877
GOTERM_BP_FAT	GO:0048666~neuron development	9	2.8754	0.082004	ENSMUSG00000024527, ENSMUSG00000031393, ENSMUSG00000031174, ENSMUSG00000038976, ENSMUSG00000030774, ENSMUSG00000028289, ENSMUSG00000032827, ENSMUSG00000033792, ENSMUSG00000026131	210	292	13588	1.99432	1	0.92744	75.9585
GOTERM_BP_FAT	GO:0034621~cellular macromolecular complex subunit organization	8	2.55591	0.0846817	ENSMUSG00000030774, ENSMUSG00000018102, ENSMUSG00000060678, ENSMUSG00000025001, ENSMUSG00000022973, ENSMUSG00000033831, ENSMUSG00000067455, ENSMUSG00000026803, ENSMUSG00000024991	210	245	13588	2.11281	1	0.930031	77.1005
GOTERM_BP_FAT	GO:0051338~regulation of transferase activity	7	2.23642	0.0873106	ENSMUSG00000000276, ENSMUSG00000033721, ENSMUSG00000062515, ENSMUSG00000024924, ENSMUSG00000004221, ENSMUSG00000032083, ENSMUSG00000030983	210	199	13588	2.27605	1	0.932346	78.1719
GOTERM_BP_FAT	GO:0040016~embryonic cleavage	2	0.638978	0.0888262	ENSMUSG00000018697, ENSMUSG00000020914	210	6	13588	21.5683	1	0.93216	78.7679
GOTERM_BP_FAT	GO:0006122~mitochondrial electron transport, ubiquinol to cytochrome c	2	0.638978	0.0888262	ENSMUSG00000021520, ENSMUSG00000031393	210	6	13588	21.5683	1	0.93216	78.7679
GOTERM_BP_FAT	GO:0051235~maintenance of location	3	0.958466	0.0911412	ENSMUSG00000052698, ENSMUSG00000029368, ENSMUSG00000032199	210	33	13588	5.88225	1	0.933662	79.6489
GOTERM_BP_FAT	GO:0040029~regulation of gene expression, epigenetic	4	1.27796	0.093033	ENSMUSG00000031393, ENSMUSG00000009545, ENSMUSG00000025001, ENSMUSG00000030322	210	70	13588	3.69741	1	0.93424	80.3432
GOTERM_BP_FAT	GO:0009628~response to abiotic stimulus	8	2.55591	0.0931186	ENSMUSG00000031393, ENSMUSG00000032060, ENSMUSG00000024990, ENSMUSG00000034485, ENSMUSG00000029553, ENSMUSG00000050541, ENSMUSG00000030322, ENSMUSG00000026162	210	251	13588	2.0623	1	0.931144	80.3741
GOTERM_BP_FAT	GO:0042060~wound healing	5	1.59744	0.0942891	ENSMUSG00000022875, ENSMUSG00000033831, ENSMUSG00000027249, ENSMUSG00000020120, ENSMUSG00000031444	210	112	13588	2.88861	1	0.930298	80.7918
GOTERM_BP_FAT	GO:0033554~cellular response to stress	11	3.51438	0.0947302	ENSMUSG00000042541, ENSMUSG00000067847, ENSMUSG00000029535, ENSMUSG00000029368, ENSMUSG00000033792, ENSMUSG00000034485, ENSMUSG00000029553, ENSMUSG00000030322, ENSMUSG00000022292, ENSMUSG00000026162, ENSMUSG00000030983	210	404	13588	1.76176	1	0.927956	80.9471
GOTERM_BP_FAT	GO:0043414~biopolymer methylation	4	1.27796	0.0960905	ENSMUSG00000031393, ENSMUSG00000025001, ENSMUSG00000074890, ENSMUSG00000030322	210	71	13588	3.64534	1	0.927558	81.4185
GOTERM_BP_FAT	GO:0006694~steroid biosynthetic process	4	1.27796	0.0960905	ENSMUSG00000021210, ENSMUSG00000038541, ENSMUSG00000063730, ENSMUSG00000032083	210	71	13588	3.64534	1	0.927558	81.4185
GOTERM_BP_FAT	GO:0055085~transmembrane transport	12	3.83387	0.098638	ENSMUSG00000009545, ENSMUSG00000028976, ENSMUSG00000004319, ENSMUSG00000021335, ENSMUSG00000037762, ENSMUSG00000033792, ENSMUSG00000022299, ENSMUSG00000017756, ENSMUSG00000024990, ENSMUSG00000022822, ENSMUSG00000038497, ENSMUSG00000020334	210	460	13588	1.68795	1	0.929583	82.2719
