# Supplementary material for: Translational contributions to tissue specificity in rhythmic and constitutive gene expression
Source: Genome Biol. 2017 Jun 16;18:116. doi: 10.1186/s13059-017-1222-2 (PMC5473967; doi:10.1186/s13059-017-1222-2)
Supplement: Supplementary file 4 — Rhythmicity parameters in kidney datasets. This file contains the outcome of the transcriptome-wide rhythmicity analyses on the kidney datasets (related to Fig. 3a). (XLSX 163 kb) [file 13059_2017_1222_MOESM4_ESM.xlsx]

## Sheet: Cyclic_sets_kidney_setsBCD
Supplementary Table S3: Detection of rhythmic events in kidney datasets
Group B: RNA rhythmic, RPF not rhythmic; Group C: RNA not rhythmic, RPF rhythmic; Group D: RNA rhythmic, RPF rhythmic
Ensembl gene ID	gene name	set	cyclic.rpf	cyclic fit.rpf	amplitude.rpf	phase.rpf	cyclic.rna	cyclic fit.rna	amplitude.rna	phase.rna
ENSMUSG00000000028	Cdc45	B	FALSE	null	1	NA	TRUE	sigmoid	1.58338	13.78
ENSMUSG00000000184	Ccnd2	B	FALSE	sinusoidal	1.26833	7.21894	TRUE	sinusoidal	2.06703	7.77208
ENSMUSG00000000301	Pemt	B	FALSE	null	1	NA	TRUE	sigmoid	2.50267	19.55
ENSMUSG00000000355	Mcts1	B	FALSE	null	1	NA	TRUE	sinusoidal	1.52869	19.6475
ENSMUSG00000000568	Hnrnpd	B	FALSE	sinusoidal	1.48874	6.08886	TRUE	sinusoidal	2.39321	5.42363
ENSMUSG00000000794	Kcnn3	B	FALSE	null	1	NA	TRUE	sigmoid	1.99059	13.93
ENSMUSG00000000884	Gnb1l	B	FALSE	null	1	NA	TRUE	sinusoidal	1.63109	6.07796
ENSMUSG00000001143	Lman2l	B	FALSE	null	1	NA	TRUE	sinusoidal	1.51344	4.77316
ENSMUSG00000001240	Ramp2	B	FALSE	sinusoidal	1.2966	12.5879	TRUE	sinusoidal	1.59124	14.7471
ENSMUSG00000001506	Col1a1	B	FALSE	null	1	NA	TRUE	sinusoidal	2.05234	5.22185
ENSMUSG00000001521	Tulp3	B	FALSE	null	1	NA	TRUE	sigmoid	1.80506	2.185
ENSMUSG00000001583	Tnk1	B	FALSE	null	1	NA	TRUE	sinusoidal	1.51568	5.12304
ENSMUSG00000002083	Bbc3	B	FALSE	null	1	NA	TRUE	sinusoidal	2.02029	5.50848
ENSMUSG00000002346	Slc25a42	B	FALSE	sinusoidal	1.40082	13.621	TRUE	sinusoidal	1.61039	12.0464
ENSMUSG00000002486	Tchp	B	FALSE	null	1	NA	TRUE	sinusoidal	1.90149	9.73664
ENSMUSG00000002578	Ikzf4	B	FALSE	null	1	NA	TRUE	sinusoidal	2.5041	5.52477
ENSMUSG00000002603	Tgfb1	B	FALSE	null	1	NA	TRUE	sinusoidal	1.93712	6.07665
ENSMUSG00000002820	Atg4d	B	FALSE	null	1	NA	TRUE	sinusoidal	1.50432	6.40074
ENSMUSG00000002835	Chaf1a	B	FALSE	null	1	NA	TRUE	sinusoidal	1.73516	7.52578
ENSMUSG00000002845	Tmem39a	B	FALSE	null	1	NA	TRUE	sigmoid	1.55644	16.04
ENSMUSG00000002983	Relb	B	FALSE	null	1	NA	TRUE	sinusoidal	1.66998	7.11449
ENSMUSG00000003198	Zfp959	B	FALSE	null	1	NA	TRUE	sinusoidal	1.68144	21.7266
ENSMUSG00000003271	Sult2b1	B	FALSE	null	1	NA	TRUE	sinusoidal	2.00017	17.1205
ENSMUSG00000003352	Cacnb3	B	FALSE	null	1	NA	TRUE	sinusoidal	1.61432	11.1932
ENSMUSG00000003500	Impdh1	B	FALSE	null	1	NA	TRUE	sinusoidal	1.72476	5.61894
ENSMUSG00000004044	Ptrf	B	FALSE	null	1	NA	TRUE	sinusoidal	1.75174	6.76691
ENSMUSG00000004071	Cdip1	B	FALSE	null	1	NA	TRUE	sinusoidal	1.58281	14.3409
ENSMUSG00000004460	Dnajb11	B	FALSE	sinusoidal	1.44168	21.3902	TRUE	sinusoidal	1.54751	20.776
ENSMUSG00000004748	Mtfp1	B	FALSE	null	1	NA	TRUE	sinusoidal	1.51748	16.46
ENSMUSG00000004996	Mri1	B	FALSE	sinusoidal	1.36426	9.78584	TRUE	sinusoidal	1.65619	8.82197
ENSMUSG00000005057	Sh2b2	B	FALSE	null	1	NA	TRUE	sigmoid	1.99936	5.73
ENSMUSG00000005131	4930550C14Rik	B	FALSE	null	1	NA	TRUE	sinusoidal	1.89431	0.505833
ENSMUSG00000005514	Por	B	FALSE	sinusoidal	1.28188	11.575	TRUE	sinusoidal	1.52946	11.1856
ENSMUSG00000005656	Snx6	B	FALSE	sinusoidal	1.19304	19.5686	TRUE	sinusoidal	1.70546	20.0102
ENSMUSG00000005667	Mthfd2	B	FALSE	null	1	NA	TRUE	sinusoidal	1.58466	20.9639
ENSMUSG00000005980	Dnase1	B	FALSE	null	1	NA	TRUE	sinusoidal	1.5081	15.9812
ENSMUSG00000005983	1700037C18Rik	B	FALSE	null	1	NA	TRUE	sinusoidal	1.51243	9.66241
ENSMUSG00000006235	Epor	B	FALSE	null	1	NA	TRUE	sinusoidal	1.68246	8.1943
ENSMUSG00000006403	Adamts4	B	FALSE	null	1	NA	TRUE	sinusoidal	3.51439	2.12292
ENSMUSG00000006412	Pfdn2	B	FALSE	null	1	NA	TRUE	sinusoidal	1.9894	8.96747
ENSMUSG00000006542	Prkag3	B	FALSE	null	1	NA	TRUE	sigmoid	1.96986	14.495
ENSMUSG00000006567	Atp7b	B	FALSE	sinusoidal	1.38602	9.59389	TRUE	sinusoidal	1.55101	9.5159
ENSMUSG00000006586	Runx1t1	B	FALSE	null	1	NA	TRUE	sinusoidal	1.94378	2.71508
ENSMUSG00000006784	Ttc25	B	FALSE	null	1	NA	TRUE	sinusoidal	1.89677	4.6463
ENSMUSG00000006906	Stambp	B	FALSE	sinusoidal	1.18187	6.86991	TRUE	sinusoidal	1.61793	5.66373
ENSMUSG00000006958	Chrd	B	FALSE	null	1	NA	TRUE	sinusoidal	1.69911	7.74701
ENSMUSG00000007097	Atp1a2	B	FALSE	sinusoidal	1.46237	10.9073	TRUE	sinusoidal	1.56766	10.0076
ENSMUSG00000007655	Cav1	B	FALSE	sigmoid	1.37049	15.22	TRUE	sigmoid	1.51383	17.365
ENSMUSG00000007777	0610009B22Rik	B	FALSE	sinusoidal	1.41585	20.6545	TRUE	sigmoid	1.52826	19.48
ENSMUSG00000007817	Zmiz1	B	FALSE	sinusoidal	1.39215	1.96553	TRUE	sinusoidal	1.54982	4.40524
ENSMUSG00000008090	Fgfrl1	B	FALSE	sinusoidal	1.44926	8.02971	TRUE	sinusoidal	1.73925	6.86091
ENSMUSG00000010064	Slc38a3	B	FALSE	null	1	NA	TRUE	sinusoidal	1.50443	11.4445
ENSMUSG00000010453	Kansl3	B	FALSE	null	1	NA	TRUE	sinusoidal	1.52994	12.762
ENSMUSG00000011306	Sugp1	B	FALSE	sinusoidal	1.30146	5.76718	TRUE	sinusoidal	1.56969	6.59383
ENSMUSG00000012350	Ehf	B	FALSE	sigmoid	1.47157	14.775	TRUE	sinusoidal	1.55176	14.3715
ENSMUSG00000012422	Tmem167	B	FALSE	sinusoidal	1.41804	18.4122	TRUE	sigmoid	2.00836	18.23
ENSMUSG00000013483	Card14	B	FALSE	null	1	NA	TRUE	sinusoidal	1.56213	4.42438
ENSMUSG00000014226	Cacybp	B	FALSE	sinusoidal	1.44122	18.9034	TRUE	sinusoidal	1.65297	20.6005
ENSMUSG00000014503	Pkd2l2	B	FALSE	null	1	NA	TRUE	sinusoidal	1.79436	0.875845
ENSMUSG00000014837	4931428F04Rik	B	FALSE	null	1	NA	TRUE	sinusoidal	1.64871	6.6731
ENSMUSG00000015165	Hnrnpl	B	FALSE	null	1	NA	TRUE	sinusoidal	1.53787	3.66937
ENSMUSG00000015599	Ttbk1	B	FALSE	null	1	NA	TRUE	sinusoidal	1.49604	4.49353
ENSMUSG00000015619	Gata3	B	FALSE	null	1	NA	TRUE	sinusoidal	1.54022	7.53028
ENSMUSG00000015652	Steap1	B	FALSE	null	1	NA	TRUE	sinusoidal	1.52346	19.0658
ENSMUSG00000015806	Qdpr	B	FALSE	null	1	NA	TRUE	sinusoidal	1.55679	6.73757
ENSMUSG00000015943	Bola1	B	FALSE	null	1	NA	TRUE	sinusoidal	1.55383	8.23942
ENSMUSG00000015962	1700016C15Rik	B	FALSE	null	1	NA	TRUE	sinusoidal	1.87146	20.1442
ENSMUSG00000015966	Il17rb	B	FALSE	sinusoidal	1.3994	13.267	TRUE	sinusoidal	1.61296	10.5019
ENSMUSG00000016194	Hsd11b1	B	FALSE	null	1	NA	TRUE	sigmoid	1.49564	19.235
ENSMUSG00000016386	Mpped2	B	FALSE	null	1	NA	TRUE	sinusoidal	1.58433	2.56848
ENSMUSG00000016526	Dyrk3	B	FALSE	null	1	NA	TRUE	sinusoidal	1.56778	2.67734
ENSMUSG00000016995	Matn4	B	FALSE	null	1	NA	TRUE	sinusoidal	1.80572	4.21265
ENSMUSG00000017057	Il13ra1	B	FALSE	null	1	NA	TRUE	sinusoidal	1.53129	20.4721
ENSMUSG00000017299	Dnttip1	B	FALSE	sinusoidal	1.19426	6.56408	TRUE	sinusoidal	1.56136	6.24943
ENSMUSG00000017405	Nek8	B	FALSE	sinusoidal	1.38843	8.73944	TRUE	sinusoidal	1.60566	9.03709
ENSMUSG00000017446	C1qtnf1	B	FALSE	sinusoidal	1.34958	4.83872	TRUE	sinusoidal	1.56644	5.59746
ENSMUSG00000017737	Mmp9	B	FALSE	null	1	NA	TRUE	sinusoidal	1.94925	5.26224
ENSMUSG00000017740	Slc12a5	B	FALSE	null	1	NA	TRUE	sinusoidal	2.19136	7.45396
ENSMUSG00000017756	Slc12a7	B	FALSE	null	1	NA	TRUE	sinusoidal	1.58047	8.00069
ENSMUSG00000017778	Cox7c	B	FALSE	sinusoidal	1.49351	16.7634	TRUE	sigmoid	1.59595	18.165
ENSMUSG00000017830	Dhx58	B	FALSE	null	1	NA	TRUE	sinusoidal	1.69804	5.5838
ENSMUSG00000018217	Pmp22	B	FALSE	null	1	NA	TRUE	sinusoidal	1.51821	15.8414
ENSMUSG00000018239	Zcchc10	B	FALSE	null	1	NA	TRUE	sinusoidal	1.90725	3.67346
ENSMUSG00000018442	Derl2	B	FALSE	sigmoid	1.33778	16.29	TRUE	sinusoidal	1.56776	19.6577
ENSMUSG00000018446	C1qbp	B	FALSE	null	1	NA	TRUE	sigmoid	1.73757	1.62
ENSMUSG00000018476	Kdm6b	B	FALSE	null	1	NA	TRUE	sinusoidal	1.6205	7.68648
ENSMUSG00000018500	Adora2b	B	FALSE	sinusoidal	1.47622	20.262	TRUE	sinusoidal	1.85512	17.7888
ENSMUSG00000018678	Sp2	B	FALSE	null	1	NA	TRUE	sinusoidal	1.85811	6.11305
ENSMUSG00000018761	Mpdu1	B	FALSE	null	1	NA	TRUE	sinusoidal	1.55648	13.4044
ENSMUSG00000018845	Unc45b	B	FALSE	null	1	NA	TRUE	sinusoidal	2.27879	5.16807
ENSMUSG00000019066	Rab3d	B	FALSE	null	1	NA	TRUE	sinusoidal	1.57194	8.36345
ENSMUSG00000019080	Mfsd3	B	FALSE	sinusoidal	1.47239	11.4352	TRUE	sinusoidal	1.69094	10.9172
ENSMUSG00000019990	Pde7b	B	FALSE	sinusoidal	1.39222	6.42227	TRUE	sinusoidal	1.51981	5.00313
ENSMUSG00000020042	Btbd11	B	FALSE	null	1	NA	TRUE	sinusoidal	1.54379	3.88247
ENSMUSG00000020175	Rab36	B	FALSE	null	1	NA	TRUE	sinusoidal	1.85241	6.4323
ENSMUSG00000020178	Adora2a	B	FALSE	null	1	NA	TRUE	sigmoid	1.57735	15.56
ENSMUSG00000020180	Snrpd3	B	FALSE	null	1	NA	TRUE	sinusoidal	1.86001	5.03302
ENSMUSG00000020290	Xpo1	B	FALSE	sinusoidal	1.43081	19.8391	TRUE	sinusoidal	1.7047	20.2918
ENSMUSG00000020308	Tpgs1	B	FALSE	null	1	NA	TRUE	sinusoidal	1.5416	6.7657
ENSMUSG00000020362	Cnot6	B	FALSE	null	1	NA	TRUE	sigmoid	1.50972	0.575
ENSMUSG00000020387	Phf15	B	FALSE	null	1	NA	TRUE	sinusoidal	1.65031	6.80374
ENSMUSG00000020388	Pdlim4	B	FALSE	null	1	NA	TRUE	sinusoidal	1.52489	5.5715
ENSMUSG00000020400	Tnip1	B	FALSE	sinusoidal	1.29105	2.70911	TRUE	sinusoidal	1.6394	5.07682
ENSMUSG00000020437	Myo1g	B	FALSE	null	1	NA	TRUE	sinusoidal	1.52301	6.074
ENSMUSG00000020441	2310033P09Rik	B	FALSE	sinusoidal	1.37735	4.86	TRUE	sinusoidal	1.52209	7.07599
ENSMUSG00000020472	Zkscan17	B	FALSE	sinusoidal	1.29718	8.90525	TRUE	sinusoidal	1.55632	7.72591
ENSMUSG00000020474	Polm	B	FALSE	null	1	NA	TRUE	sinusoidal	1.9161	6.65005
ENSMUSG00000020476	Dbnl	B	FALSE	sinusoidal	1.1212	2.85034	TRUE	sinusoidal	1.54315	7.04819
ENSMUSG00000020483	Dynll2	B	FALSE	sinusoidal	1.48715	16.3422	TRUE	sinusoidal	1.58943	7.06164
ENSMUSG00000020546	Stxbp4	B	FALSE	null	1	NA	TRUE	sinusoidal	1.50909	17.6083
ENSMUSG00000020598	Nrcam	B	FALSE	null	1	NA	TRUE	sigmoid	1.8481	15.93
ENSMUSG00000020605	Hs1bp3	B	FALSE	sinusoidal	1.38705	2.85321	TRUE	sinusoidal	1.60076	4.50073
ENSMUSG00000020642	Rnf144a	B	FALSE	null	1	NA	TRUE	sinusoidal	1.83782	2.04627
ENSMUSG00000020644	Id2	B	FALSE	null	1	NA	TRUE	sinusoidal	1.63916	17.0636
ENSMUSG00000020654	Adcy3	B	FALSE	sinusoidal	1.30149	5.32179	TRUE	sinusoidal	1.56631	5.27124
ENSMUSG00000020674	Pxdn	B	FALSE	sinusoidal	1.43053	5.53993	TRUE	sinusoidal	1.56467	6.09639
ENSMUSG00000020680	Taf15	B	FALSE	sinusoidal	1.33236	2.80786	TRUE	sinusoidal	1.7364	5.9654
ENSMUSG00000020698	Cct6b	B	FALSE	null	1	NA	TRUE	sinusoidal	1.5676	22.7298
ENSMUSG00000020743	Mif4gd	B	FALSE	sinusoidal	1.49313	19.6713	TRUE	sinusoidal	1.51948	21.4412
ENSMUSG00000020787	P2rx1	B	FALSE	null	1	NA	TRUE	sinusoidal	1.52907	3.28853
ENSMUSG00000020814	Mxra7	B	FALSE	null	1	NA	TRUE	sinusoidal	1.548	9.58074
ENSMUSG00000020836	Coro6	B	FALSE	null	1	NA	TRUE	sinusoidal	2.26281	6.13444
ENSMUSG00000020900	Myh10	B	FALSE	sinusoidal	1.1842	5.78342	TRUE	sinusoidal	1.5059	5.88635
ENSMUSG00000021025	Nfkbia	B	FALSE	null	1	NA	TRUE	sinusoidal	1.56792	10.0721
ENSMUSG00000021125	Arg2	B	FALSE	null	1	NA	TRUE	sigmoid	2.04549	15.755
ENSMUSG00000021182	Ccdc88c	B	FALSE	null	1	NA	TRUE	sinusoidal	1.51397	11.7097
ENSMUSG00000021203	Otub2	B	FALSE	null	1	NA	TRUE	sinusoidal	1.95984	19.3489
ENSMUSG00000021211	Akr1c12	B	FALSE	null	1	NA	TRUE	sigmoid	1.841	11.88
ENSMUSG00000021213	Akr1c13	B	FALSE	sinusoidal	1.48853	9.30225	TRUE	sigmoid	1.61119	11.25
ENSMUSG00000021223	Papln	B	FALSE	sinusoidal	1.47771	12.1148	TRUE	sinusoidal	1.56156	10.0038
ENSMUSG00000021248	Tmed10	B	FALSE	sinusoidal	1.12751	19.4208	TRUE	sigmoid	1.49509	1.26
ENSMUSG00000021294	Kif26a	B	FALSE	null	1	NA	TRUE	sinusoidal	1.62862	4.46111
ENSMUSG00000021318	Gli3	B	FALSE	null	1	NA	TRUE	sinusoidal	1.505	7.24249
ENSMUSG00000021335	Slc17a1	B	FALSE	sinusoidal	1.2488	17.5634	TRUE	sinusoidal	1.51232	18.3648
ENSMUSG00000021359	Tfap2a	B	FALSE	null	1	NA	TRUE	sinusoidal	2.42081	5.75684
ENSMUSG00000021388	Aspn	B	FALSE	null	1	NA	TRUE	sinusoidal	2.68121	16.4594
ENSMUSG00000021390	Ogn	B	FALSE	null	1	NA	TRUE	sinusoidal	1.78236	19.3913
ENSMUSG00000021423	Ly86	B	FALSE	null	1	NA	TRUE	sigmoid	1.60768	21.265
ENSMUSG00000021481	Zfp346	B	FALSE	null	1	NA	TRUE	sinusoidal	1.49818	5.73633
ENSMUSG00000021572	Cep72	B	FALSE	null	1	NA	TRUE	sinusoidal	1.81344	9.29486
ENSMUSG00000021714	Cenpk	B	FALSE	null	1	NA	TRUE	sinusoidal	1.73304	20.5955
ENSMUSG00000021747	4930452B06Rik	B	FALSE	null	1	NA	TRUE	sinusoidal	1.62071	13.4878
ENSMUSG00000021760	Gpx8	B	FALSE	null	1	NA	TRUE	sinusoidal	1.67564	20.7822
ENSMUSG00000021774	Ube2e1	B	FALSE	null	1	NA	TRUE	sinusoidal	1.49879	5.34357
ENSMUSG00000021871	Pnp	B	FALSE	sinusoidal	1.30955	23.1237	TRUE	sinusoidal	1.54742	0.504249
ENSMUSG00000021892	Sh3bp5	B	FALSE	sinusoidal	1.22746	6.39911	TRUE	sinusoidal	1.86052	6.88197
ENSMUSG00000022003	Slc25a30	B	FALSE	null	1	NA	TRUE	sinusoidal	1.51421	0.525379
ENSMUSG00000022070	Bora	B	FALSE	null	1	NA	TRUE	sinusoidal	1.70476	7.05201
ENSMUSG00000022074	Tnfrsf10b	B	FALSE	null	1	NA	TRUE	sinusoidal	1.68153	3.30723
ENSMUSG00000022132	Cldn10	B	FALSE	sinusoidal	1.39974	23.9259	TRUE	sinusoidal	1.57913	23.4047
ENSMUSG00000022174	Dad1	B	FALSE	null	1	NA	TRUE	sinusoidal	1.66033	16.1777
ENSMUSG00000022177	Haus4	B	FALSE	sigmoid	1.46523	8.715	TRUE	sigmoid	1.65153	6.375
ENSMUSG00000022194	Pabpn1	B	FALSE	null	1	NA	TRUE	sinusoidal	1.54462	6.84206
ENSMUSG00000022197	Pdzd2	B	FALSE	null	1	NA	TRUE	sinusoidal	1.49995	4.31872
ENSMUSG00000022206	Npr3	B	FALSE	sinusoidal	1.46438	0.484763	TRUE	sinusoidal	1.64541	1.94812
ENSMUSG00000022211	Lrrc16b	B	FALSE	null	1	NA	TRUE	sinusoidal	1.80614	7.40935
ENSMUSG00000022217	Emc9	B	FALSE	null	1	NA	TRUE	sinusoidal	1.60796	8.88551
ENSMUSG00000022353	Mtss1	B	FALSE	sinusoidal	1.26989	9.55243	TRUE	sinusoidal	1.59299	10.8702
ENSMUSG00000022366	Slc22a22	B	FALSE	null	1	NA	TRUE	sinusoidal	1.64459	18.1875
ENSMUSG00000022421	Nptxr	B	FALSE	null	1	NA	TRUE	sigmoid	1.76143	6.355
ENSMUSG00000022435	Upk3a	B	FALSE	null	1	NA	TRUE	sinusoidal	1.52156	6.96619
ENSMUSG00000022438	Parvb	B	FALSE	null	1	NA	TRUE	sigmoid	1.9628	0.525
ENSMUSG00000022440	C1qtnf6	B	FALSE	sinusoidal	1.49263	6.25541	TRUE	sinusoidal	2.45687	6.08401
ENSMUSG00000022468	Endou	B	FALSE	null	1	NA	TRUE	sinusoidal	1.78031	3.73107
ENSMUSG00000022489	Pde1b	B	FALSE	null	1	NA	TRUE	sinusoidal	1.71276	7.2894
ENSMUSG00000022546	Gpt	B	FALSE	null	1	NA	TRUE	sinusoidal	1.6049	14.6625
ENSMUSG00000022565	Plec	B	FALSE	null	1	NA	TRUE	sinusoidal	1.51845	6.4342
ENSMUSG00000022602	Arc	B	FALSE	null	1	NA	TRUE	sinusoidal	2.29962	10.7261
ENSMUSG00000022610	Mapk12	B	FALSE	null	1	NA	TRUE	sinusoidal	1.57921	7.49572
ENSMUSG00000022754	Tmem45a	B	FALSE	null	1	NA	TRUE	sigmoid	2.28613	15.75
ENSMUSG00000022791	Tnk2	B	FALSE	null	1	NA	TRUE	sinusoidal	1.68402	7.4965
ENSMUSG00000022868	Ahsg	B	FALSE	null	1	NA	TRUE	sigmoid	3.75487	0.855
ENSMUSG00000022875	Kng1	B	FALSE	null	1	NA	TRUE	sinusoidal	2.07192	1.65469
ENSMUSG00000022877	Hrg	B	FALSE	null	1	NA	TRUE	sinusoidal	1.80124	20.5087
ENSMUSG00000023018	Smarcd1	B	FALSE	sinusoidal	1.3793	6.65202	TRUE	sinusoidal	1.65313	5.62007
ENSMUSG00000023055	Calcoco1	B	FALSE	sinusoidal	1.34628	7.51351	TRUE	sinusoidal	1.64862	7.2537
ENSMUSG00000023064	Sncg	B	FALSE	null	1	NA	TRUE	sinusoidal	1.71044	10.3161
ENSMUSG00000023072	Cep89	B	FALSE	null	1	NA	TRUE	sinusoidal	1.58505	5.7728
ENSMUSG00000023206	Il15ra	B	FALSE	null	1	NA	TRUE	sinusoidal	1.77983	13.7283
ENSMUSG00000023216	Epb4.2	B	FALSE	null	1	NA	TRUE	sigmoid	2.23655	15.755
ENSMUSG00000023505	Cdca3	B	FALSE	null	1	NA	TRUE	sinusoidal	2.1839	12.3923
ENSMUSG00000023809	Rps6ka2	B	FALSE	null	1	NA	TRUE	sinusoidal	1.6404	4.77725
ENSMUSG00000023873	1700010I14Rik	B	FALSE	null	1	NA	TRUE	sinusoidal	2.08219	3.06263
ENSMUSG00000023882	Zfp54	B	FALSE	null	1	NA	TRUE	sinusoidal	1.58233	21.4495
ENSMUSG00000023892	Zfp51	B	FALSE	null	1	NA	TRUE	sinusoidal	1.55014	19.8332
ENSMUSG00000023919	Cenpq	B	FALSE	null	1	NA	TRUE	sinusoidal	1.56825	20.7202
ENSMUSG00000023947	Nfkbie	B	FALSE	null	1	NA	TRUE	sinusoidal	1.65573	6.52422
ENSMUSG00000024014	Pim1	B	FALSE	null	1	NA	TRUE	sinusoidal	1.7877	2.93923
ENSMUSG00000024036	Slc37a1	B	FALSE	null	1	NA	TRUE	sinusoidal	1.72144	5.11528
ENSMUSG00000024059	Clip4	B	FALSE	sinusoidal	1.31015	7.01062	TRUE	sinusoidal	1.50504	5.0496
ENSMUSG00000024087	Cyp1b1	B	FALSE	sinusoidal	1.47636	4.82427	TRUE	sinusoidal	1.50778	6.27888
ENSMUSG00000024121	Atp6v0c	B	FALSE	null	1	NA	TRUE	sinusoidal	1.57321	7.06274
ENSMUSG00000024301	Kifc5b	B	FALSE	null	1	NA	TRUE	sinusoidal	1.64329	6.67772
ENSMUSG00000024325	Ring1	B	FALSE	sinusoidal	1.38452	3.04231	TRUE	sinusoidal	1.58626	6.01169
ENSMUSG00000024590	Lmnb1	B	FALSE	null	1	NA	TRUE	sinusoidal	1.64773	5.42436
ENSMUSG00000024737	Slc15a3	B	FALSE	null	1	NA	TRUE	sinusoidal	1.89514	4.90075
ENSMUSG00000024743	Syt7	B	FALSE	null	1	NA	TRUE	sinusoidal	1.49966	1.85887
ENSMUSG00000024747	Aldh1a7	B	FALSE	null	1	NA	TRUE	sigmoid	2.04599	16.095
ENSMUSG00000024766	Lipo1	B	FALSE	null	1	NA	TRUE	sinusoidal	1.75394	20.5121
ENSMUSG00000024769	Cdc42bpg	B	FALSE	sigmoid	1.20247	7.055	TRUE	sinusoidal	1.579	7.69875
ENSMUSG00000024785	Rcl1	B	FALSE	sigmoid	1.36487	6.85	TRUE	sinusoidal	1.51322	6.57912
ENSMUSG00000024800	Rpp30	B	FALSE	null	1	NA	TRUE	sigmoid	1.50224	19.8
ENSMUSG00000024962	Vegfb	B	FALSE	null	1	NA	TRUE	sinusoidal	1.57689	5.94702
ENSMUSG00000024975	Pdcd4	B	FALSE	sinusoidal	1.46233	8.98272	TRUE	sinusoidal	1.66041	7.10898
ENSMUSG00000024985	Tcf7l2	B	FALSE	null	1	NA	TRUE	sinusoidal	1.75115	5.83212
ENSMUSG00000024986	Hhex	B	FALSE	null	1	NA	TRUE	sinusoidal	2.19336	4.22588
ENSMUSG00000025082	Vwa2	B	FALSE	null	1	NA	TRUE	sinusoidal	1.50994	4.74975
ENSMUSG00000025104	Hdgfrp3	B	FALSE	null	1	NA	TRUE	sigmoid	1.57202	20.515
ENSMUSG00000025347	Mettl7b	B	FALSE	sigmoid	1.43836	18.165	TRUE	sinusoidal	1.51229	19.0192
ENSMUSG00000025353	Ormdl2	B	FALSE	null	1	NA	TRUE	sinusoidal	1.55009	17.3142
ENSMUSG00000025422	Agap2	B	FALSE	null	1	NA	TRUE	sigmoid	1.89346	14.545
ENSMUSG00000025495	Ptdss2	B	FALSE	null	1	NA	TRUE	sinusoidal	1.64914	6.55046
ENSMUSG00000025498	Irf7	B	FALSE	null	1	NA	TRUE	sinusoidal	1.60373	9.20321
ENSMUSG00000025732	Fam195a	B	FALSE	null	1	NA	TRUE	sinusoidal	1.62587	14.6189
ENSMUSG00000025757	Hspa4l	B	FALSE	sinusoidal	1.37735	21.3786	TRUE	sinusoidal	1.57903	21.0758
ENSMUSG00000025764	Phf17	B	FALSE	sigmoid	1.46468	7.365	TRUE	sinusoidal	1.53921	6.66459
ENSMUSG00000025779	Ly96	B	FALSE	sinusoidal	1.43945	20.2545	TRUE	sigmoid	1.81004	19.6
ENSMUSG00000025875	Tspan17	B	FALSE	null	1	NA	TRUE	sigmoid	2.00022	10.37
ENSMUSG00000025876	Unc5a	B	FALSE	null	1	NA	TRUE	sinusoidal	1.62453	5.3987
ENSMUSG00000025925	Terf1	B	FALSE	sinusoidal	1.47444	22.2866	TRUE	sinusoidal	1.54672	0.836819
ENSMUSG00000025927	Tfap2b	B	FALSE	null	1	NA	TRUE	sinusoidal	1.51564	10.1888
ENSMUSG00000025956	Mettl21a	B	FALSE	null	1	NA	TRUE	sigmoid	1.52218	11.175
ENSMUSG00000026088	Mitd1	B	FALSE	null	1	NA	TRUE	sinusoidal	1.53136	20.9343
ENSMUSG00000026271	Gpr35	B	FALSE	null	1	NA	TRUE	sinusoidal	2.80349	7.02651
ENSMUSG00000026303	Mlph	B	FALSE	sinusoidal	1.35391	1.31373	TRUE	sinusoidal	1.70018	3.44513
ENSMUSG00000026437	Cdk18	B	FALSE	sinusoidal	1.44991	11.4097	TRUE	sinusoidal	1.56918	9.83779
ENSMUSG00000026457	Adipor1	B	FALSE	null	1	NA	TRUE	sigmoid	1.50686	18.27
ENSMUSG00000026473	Glul	B	FALSE	sinusoidal	1.48685	14.5344	TRUE	sigmoid	1.60035	14.82
ENSMUSG00000026489	Adck3	B	FALSE	sinusoidal	1.47709	1.75473	TRUE	sinusoidal	1.79575	3.29651
ENSMUSG00000026492	Tfb2m	B	FALSE	null	1	NA	TRUE	sinusoidal	1.72094	8.76895
ENSMUSG00000026657	Frmd4a	B	FALSE	null	1	NA	TRUE	sinusoidal	1.55395	5.53915
ENSMUSG00000026676	Ccdc3	B	FALSE	null	1	NA	TRUE	sinusoidal	2.48025	11.7498
ENSMUSG00000026708	Cenpl	B	FALSE	null	1	NA	TRUE	sinusoidal	1.50038	4.9956
ENSMUSG00000026761	Orc4	B	FALSE	null	1	NA	TRUE	sinusoidal	1.57958	20.0696
ENSMUSG00000026786	Apbb1ip	B	FALSE	null	1	NA	TRUE	sinusoidal	1.8196	5.56619
ENSMUSG00000026930	Gpsm1	B	FALSE	null	1	NA	TRUE	sinusoidal	1.50403	9.2466
ENSMUSG00000026965	Anapc2	B	FALSE	null	1	NA	TRUE	sinusoidal	1.79753	6.09121
ENSMUSG00000026972	Arrdc1	B	FALSE	null	1	NA	TRUE	sinusoidal	1.51298	12.5481
ENSMUSG00000026976	Pax8	B	FALSE	sinusoidal	1.43548	20.4136	TRUE	sinusoidal	1.52188	16.7313
ENSMUSG00000026999	Nup35	B	FALSE	sinusoidal	1.39095	19.4312	TRUE	sinusoidal	1.64223	18.7275
ENSMUSG00000027074	Slc43a3	B	FALSE	sinusoidal	1.3253	14.4344	TRUE	sinusoidal	1.73826	14.7625
ENSMUSG00000027088	Phospho2	B	FALSE	null	1	NA	TRUE	sinusoidal	1.99024	19.9784
ENSMUSG00000027133	Nop10	B	FALSE	null	1	NA	TRUE	sigmoid	1.52524	21.065
ENSMUSG00000027248	Pdia3	B	FALSE	sinusoidal	1.44355	22.3186	TRUE	sinusoidal	1.50264	23.9441
ENSMUSG00000027249	F2	B	FALSE	null	1	NA	TRUE	sinusoidal	1.70001	1.44478
ENSMUSG00000027274	Mkks	B	FALSE	null	1	NA	TRUE	sinusoidal	1.60101	20.4296
ENSMUSG00000027314	Dll4	B	FALSE	sinusoidal	1.33774	9.16123	TRUE	sinusoidal	1.65306	7.61636
ENSMUSG00000027317	Ppp1r14d	B	FALSE	null	1	NA	TRUE	sinusoidal	2.07501	23.74
ENSMUSG00000027330	Cdc25b	B	FALSE	null	1	NA	TRUE	sinusoidal	1.68244	5.79064
ENSMUSG00000027344	Fsip1	B	FALSE	null	1	NA	TRUE	sinusoidal	2.21447	2.00319
ENSMUSG00000027349	Fam98b	B	FALSE	null	1	NA	TRUE	sinusoidal	1.69729	4.76025
ENSMUSG00000027358	Bmp2	B	FALSE	null	1	NA	TRUE	sinusoidal	1.59956	1.32512
ENSMUSG00000027381	Bcl2l11	B	FALSE	null	1	NA	TRUE	sigmoid	1.60244	6.305
ENSMUSG00000027463	Slc52a3	B	FALSE	sinusoidal	1.26939	16.2833	TRUE	sinusoidal	1.63531	14.0129
ENSMUSG00000027474	Ccm2l	B	FALSE	null	1	NA	TRUE	sinusoidal	1.6107	7.62312
ENSMUSG00000027490	E2f1	B	FALSE	null	1	NA	TRUE	sinusoidal	1.58882	5.94737
ENSMUSG00000027514	Zbp1	B	FALSE	null	1	NA	TRUE	sinusoidal	1.6497	4.3672
ENSMUSG00000027544	Nfatc2	B	FALSE	null	1	NA	TRUE	sinusoidal	2.26304	5.90473
ENSMUSG00000027635	Dsn1	B	FALSE	null	1	NA	TRUE	sinusoidal	1.69482	9.49221
ENSMUSG00000027762	Sucnr1	B	FALSE	null	1	NA	TRUE	sinusoidal	1.65646	18.1467
ENSMUSG00000027804	Ppid	B	FALSE	sinusoidal	1.40707	20.977	TRUE	sinusoidal	1.6569	20.3899
ENSMUSG00000027893	Ahcyl1	B	FALSE	null	1	NA	TRUE	sinusoidal	1.66959	6.15488
ENSMUSG00000027896	Slc16a4	B	FALSE	null	1	NA	TRUE	sinusoidal	1.5044	18.0534
ENSMUSG00000028019	Pdgfc	B	FALSE	null	1	NA	TRUE	sinusoidal	1.49575	5.4703
ENSMUSG00000028073	Pear1	B	FALSE	sinusoidal	1.43872	12.3011	TRUE	sinusoidal	1.52513	11.3817
ENSMUSG00000028076	Cd1d1	B	FALSE	null	1	NA	TRUE	sinusoidal	1.73395	8.77228
ENSMUSG00000028104	Polr3gl	B	FALSE	null	1	NA	TRUE	sigmoid	1.62271	11.675
ENSMUSG00000028145	Them4	B	FALSE	sinusoidal	1.40674	16.9352	TRUE	sinusoidal	1.61973	18.2022
ENSMUSG00000028180	Zranb2	B	FALSE	sinusoidal	1.37584	22.4754	TRUE	sinusoidal	1.66016	20.0116
ENSMUSG00000028212	Ccne2	B	FALSE	null	1	NA	TRUE	sinusoidal	2.20251	18.276
ENSMUSG00000028222	Calb1	B	FALSE	null	1	NA	TRUE	sinusoidal	1.50022	23.7815
ENSMUSG00000028261	Ndufaf4	B	FALSE	null	1	NA	TRUE	sinusoidal	1.65871	17.8878
ENSMUSG00000028339	Col15a1	B	FALSE	sinusoidal	1.45356	6.23902	TRUE	sinusoidal	1.5928	6.05492
ENSMUSG00000028356	Ambp	B	FALSE	null	1	NA	TRUE	sinusoidal	2.07276	2.6045
ENSMUSG00000028399	Ptprd	B	FALSE	null	1	NA	TRUE	sinusoidal	1.72903	17.2812
ENSMUSG00000028435	Aqp3	B	FALSE	sinusoidal	1.38349	12.0882	TRUE	sigmoid	1.55339	14.07
ENSMUSG00000028467	Gba2	B	FALSE	null	1	NA	TRUE	sinusoidal	1.69408	5.7238
ENSMUSG00000028521	Slc35d1	B	FALSE	sigmoid	1.4751	11.515	TRUE	sinusoidal	1.90193	5.8964
ENSMUSG00000028553	Angptl3	B	FALSE	null	1	NA	TRUE	sigmoid	1.86587	19.845
ENSMUSG00000028555	Ttc39a	B	FALSE	null	1	NA	TRUE	sinusoidal	2.24192	7.96181
ENSMUSG00000028617	Lrrc42	B	FALSE	sinusoidal	1.20263	2.28525	TRUE	sinusoidal	1.69711	4.70111
ENSMUSG00000028634	Hivep3	B	FALSE	null	1	NA	TRUE	sinusoidal	1.77209	5.77512
ENSMUSG00000028637	Ccdc30	B	FALSE	null	1	NA	TRUE	sinusoidal	1.64975	7.33474
ENSMUSG00000028745	Capzb	B	FALSE	null	1	NA	TRUE	sinusoidal	1.64623	5.68415
ENSMUSG00000028755	Cda	B	FALSE	null	1	NA	TRUE	sinusoidal	1.60153	13.0197
ENSMUSG00000028789	Adc	B	FALSE	null	1	NA	TRUE	sinusoidal	2.4799	8.14644
ENSMUSG00000028799	Zfp362	B	FALSE	null	1	NA	TRUE	sinusoidal	1.50152	7.74316
ENSMUSG00000028874	Fgr	B	FALSE	null	1	NA	TRUE	sinusoidal	1.86909	5.98505
ENSMUSG00000028952	Zbtb48	B	FALSE	null	1	NA	TRUE	sinusoidal	1.61597	6.48047
ENSMUSG00000028959	Fastk	B	FALSE	sinusoidal	1.31532	6.27547	TRUE	sinusoidal	1.53278	11.9635
ENSMUSG00000028967	Errfi1	B	FALSE	sinusoidal	1.29823	13.7768	TRUE	sinusoidal	1.7158	15.6325
ENSMUSG00000028970	Abcb1b	B	FALSE	null	1	NA	TRUE	sigmoid	1.63898	15.99
ENSMUSG00000029027	Dffb	B	FALSE	null	1	NA	TRUE	sinusoidal	1.51641	7.92335
ENSMUSG00000029064	Gnb1	B	FALSE	null	1	NA	TRUE	sinusoidal	1.79322	5.13133
ENSMUSG00000029125	Stx18	B	FALSE	sinusoidal	1.44745	21.0543	TRUE	sinusoidal	1.52728	21.0151
ENSMUSG00000029130	Rnf32	B	FALSE	null	1	NA	TRUE	sinusoidal	1.64736	18.7633
ENSMUSG00000029135	Fosl2	B	FALSE	null	1	NA	TRUE	sigmoid	1.58311	6.24
ENSMUSG00000029156	Sgcb	B	FALSE	null	1	NA	TRUE	sigmoid	1.55525	1.185
ENSMUSG00000029166	Mapre3	B	FALSE	null	1	NA	TRUE	sinusoidal	1.4972	5.26487
ENSMUSG00000029273	Sult1d1	B	FALSE	sigmoid	1.34577	15.895	TRUE	sinusoidal	1.7109	18.8841
ENSMUSG00000029279	Brdt	B	FALSE	null	1	NA	TRUE	sinusoidal	1.89451	6.51814
ENSMUSG00000029334	Prkg2	B	FALSE	null	1	NA	TRUE	sigmoid	5.17823	7.06
ENSMUSG00000029370	Rassf6	B	FALSE	sinusoidal	1.45854	18.1795	TRUE	sigmoid	1.537	16.67
ENSMUSG00000029478	Ncor2	B	FALSE	null	1	NA	TRUE	sinusoidal	1.75865	6.48994
ENSMUSG00000029516	Cit	B	FALSE	sinusoidal	1.47176	7.81335	TRUE	sinusoidal	1.80392	7.80717
ENSMUSG00000029561	Oasl2	B	FALSE	null	1	NA	TRUE	sinusoidal	1.5287	5.87751
ENSMUSG00000029614	Rpl6	B	FALSE	null	1	NA	TRUE	sinusoidal	1.55742	14.9036
ENSMUSG00000029790	Cep41	B	FALSE	null	1	NA	TRUE	sigmoid	1.54058	21.245
ENSMUSG00000029819	Npy	B	FALSE	null	1	NA	TRUE	sinusoidal	1.6271	17.6919
ENSMUSG00000029923	Rab19	B	FALSE	null	1	NA	TRUE	sigmoid	1.72224	20.055
ENSMUSG00000030016	Zfml	B	FALSE	sinusoidal	1.28088	19.1847	TRUE	sinusoidal	1.55905	19.4859
ENSMUSG00000030083	Abtb1	B	FALSE	sinusoidal	1.35391	7.55679	TRUE	sigmoid	1.50661	6.61
ENSMUSG00000030098	Grip2	B	FALSE	null	1	NA	TRUE	sinusoidal	2.02659	4.98609
ENSMUSG00000030109	Slc6a12	B	FALSE	null	1	NA	TRUE	sigmoid	2.52123	15.955
ENSMUSG00000030123	Plxnd1	B	FALSE	sinusoidal	1.45606	5.99306	TRUE	sinusoidal	1.58963	6.94705
ENSMUSG00000030148	Clec4a2	B	FALSE	null	1	NA	TRUE	sinusoidal	2.08	14.186
ENSMUSG00000030157	Clec2d	B	FALSE	null	1	NA	TRUE	sinusoidal	1.8278	15.8213
ENSMUSG00000030231	Plekha5	B	FALSE	sinusoidal	1.20699	4.35101	TRUE	sinusoidal	1.53487	3.72657
ENSMUSG00000030245	Golt1b	B	FALSE	null	1	NA	TRUE	sinusoidal	1.53978	18.0107
ENSMUSG00000030271	Ogg1	B	FALSE	null	1	NA	TRUE	sinusoidal	1.51182	7.32563
ENSMUSG00000030291	Med21	B	FALSE	sigmoid	1.3042	17.985	TRUE	sinusoidal	1.62566	18.8203
ENSMUSG00000030364	Clec2h	B	FALSE	null	1	NA	TRUE	sinusoidal	2.3409	5.05581
ENSMUSG00000030401	Rtn2	B	FALSE	null	1	NA	TRUE	sinusoidal	2.24163	14.6088
ENSMUSG00000030424	Zfp939	B	FALSE	null	1	NA	TRUE	sinusoidal	1.56185	4.68114
ENSMUSG00000030556	Lrrc28	B	FALSE	null	1	NA	TRUE	sinusoidal	1.52478	16.7705
ENSMUSG00000030670	Cyp2r1	B	FALSE	null	1	NA	TRUE	sinusoidal	1.68506	21.4689
ENSMUSG00000030674	Qprt	B	FALSE	null	1	NA	TRUE	sinusoidal	1.50263	8.5868
ENSMUSG00000030703	Gdpd3	B	FALSE	sinusoidal	1.44092	8.18485	TRUE	sigmoid	1.5132	15.245
ENSMUSG00000030739	Myh14	B	FALSE	null	1	NA	TRUE	sinusoidal	1.74526	8.92753
ENSMUSG00000030800	Prss8	B	FALSE	null	1	NA	TRUE	sinusoidal	1.542	12.4349
ENSMUSG00000030805	Stx4a	B	FALSE	null	1	NA	TRUE	sinusoidal	1.83753	5.50994
ENSMUSG00000030847	Bag3	B	FALSE	null	1	NA	TRUE	sigmoid	1.80522	14.215
ENSMUSG00000030878	Cdr2	B	FALSE	sinusoidal	1.33679	17.8455	TRUE	sinusoidal	1.50542	17.1443
ENSMUSG00000030968	Pdilt	B	FALSE	null	1	NA	TRUE	sinusoidal	1.64403	11.1989
ENSMUSG00000031105	Slc25a14	B	FALSE	null	1	NA	TRUE	sinusoidal	1.50725	19.5169
ENSMUSG00000031146	Plp2	B	FALSE	null	1	NA	TRUE	sinusoidal	1.54161	16.5038
ENSMUSG00000031149	Praf2	B	FALSE	null	1	NA	TRUE	sinusoidal	1.61676	17.9734
ENSMUSG00000031169	Porcn	B	FALSE	null	1	NA	TRUE	sinusoidal	1.72723	11.9327
ENSMUSG00000031232	Magt1	B	FALSE	sinusoidal	1.27873	22.784	TRUE	sinusoidal	1.62131	20.5947
ENSMUSG00000031502	Col4a1	B	FALSE	sinusoidal	1.48151	4.13698	TRUE	sigmoid	1.55752	3.095
ENSMUSG00000031503	Col4a2	B	FALSE	null	1	NA	TRUE	sigmoid	1.49821	3.705
ENSMUSG00000031511	Arhgef7	B	FALSE	null	1	NA	TRUE	sinusoidal	1.59432	5.15986
ENSMUSG00000031520	Vegfc	B	FALSE	null	1	NA	TRUE	sinusoidal	1.6381	22.7272
ENSMUSG00000031530	Dusp4	B	FALSE	null	1	NA	TRUE	sigmoid	1.62342	7.795
ENSMUSG00000031662	Snx20	B	FALSE	null	1	NA	TRUE	sinusoidal	2.12356	3.87034
ENSMUSG00000031665	Sall1	B	FALSE	sinusoidal	1.42901	16.424	TRUE	sigmoid	1.59894	15.59
ENSMUSG00000031673	Cdh11	B	FALSE	sinusoidal	1.45242	4.06936	TRUE	sinusoidal	1.70437	2.17723
ENSMUSG00000031722	Hp	B	FALSE	null	1	NA	TRUE	sigmoid	2.28505	3.925
ENSMUSG00000031749	St3gal2	B	FALSE	null	1	NA	TRUE	sigmoid	1.75756	1.995
ENSMUSG00000031756	Cenpn	B	FALSE	null	1	NA	TRUE	sinusoidal	1.68398	21.0761
ENSMUSG00000031808	Slc27a1	B	FALSE	sinusoidal	1.43781	10.8826	TRUE	sigmoid	1.60044	8.48
ENSMUSG00000031845	Bcmo1	B	FALSE	null	1	NA	TRUE	sinusoidal	1.53351	5.72613
ENSMUSG00000031848	Lsm4	B	FALSE	null	1	NA	TRUE	sinusoidal	1.51109	8.21848
ENSMUSG00000031891	Hsd11b2	B	FALSE	sinusoidal	1.19129	18.4007	TRUE	sigmoid	1.77731	1.12
ENSMUSG00000031982	Arv1	B	FALSE	null	1	NA	TRUE	sinusoidal	1.69224	7.78352
ENSMUSG00000031994	Adamts8	B	FALSE	null	1	NA	TRUE	sinusoidal	1.69191	3.68691
ENSMUSG00000032060	Cryab	B	FALSE	null	1	NA	TRUE	sigmoid	1.53198	15.53
ENSMUSG00000032087	Dscaml1	B	FALSE	null	1	NA	TRUE	sinusoidal	1.76489	9.83848
ENSMUSG00000032109	Nlrx1	B	FALSE	sigmoid	1.40793	6.275	TRUE	sigmoid	1.56433	7.595
ENSMUSG00000032122	Slc37a2	B	FALSE	null	1	NA	TRUE	sinusoidal	1.83521	16.599
ENSMUSG00000032245	Cln6	B	FALSE	null	1	NA	TRUE	sinusoidal	1.57995	13.7141
ENSMUSG00000032278	Paqr5	B	FALSE	null	1	NA	TRUE	sinusoidal	1.49572	16.2282
ENSMUSG00000032280	Tle3	B	FALSE	sinusoidal	1.39796	4.33213	TRUE	sigmoid	1.5352	7.945
ENSMUSG00000032281	Acsbg1	B	FALSE	null	1	NA	TRUE	sinusoidal	2.16947	7.17591
ENSMUSG00000032380	Dapk2	B	FALSE	sinusoidal	1.352	4.15874	TRUE	sinusoidal	1.58282	2.58748
ENSMUSG00000032403	2300009A05Rik	B	FALSE	sinusoidal	1.43283	23.0614	TRUE	sinusoidal	1.53773	18.2508
ENSMUSG00000032477	Cdc25a	B	FALSE	null	1	NA	TRUE	sinusoidal	1.55741	19.883
ENSMUSG00000032523	Hhatl	B	FALSE	sigmoid	1.38574	6.5	TRUE	sinusoidal	1.53288	5.32014
ENSMUSG00000032537	Ephb1	B	FALSE	null	1	NA	TRUE	sinusoidal	1.88057	11.6287
ENSMUSG00000032549	Rab6b	B	FALSE	null	1	NA	TRUE	sinusoidal	1.58968	4.59741
ENSMUSG00000032561	Acpp	B	FALSE	sinusoidal	1.4209	7.04752	TRUE	sinusoidal	1.51962	7.10578
ENSMUSG00000032584	Mst1r	B	FALSE	null	1	NA	TRUE	sinusoidal	1.7962	8.80555
ENSMUSG00000032609	Klhdc8b	B	FALSE	null	1	NA	TRUE	sinusoidal	1.82498	9.08856
ENSMUSG00000032726	Bmp8a	B	FALSE	null	1	NA	TRUE	sinusoidal	1.57548	15.8706
ENSMUSG00000032758	Kap	B	FALSE	null	1	NA	TRUE	sigmoid	1.49775	19.905
ENSMUSG00000032766	Gng11	B	FALSE	null	1	NA	TRUE	sigmoid	1.56909	18.295
ENSMUSG00000032860	P2ry2	B	FALSE	null	1	NA	TRUE	sinusoidal	1.63018	13.1163
ENSMUSG00000032883	Acsl3	B	FALSE	sinusoidal	1.27752	18.0305	TRUE	sinusoidal	1.51036	19.9485
ENSMUSG00000032898	Fbxo21	B	FALSE	sinusoidal	1.40867	7.07509	TRUE	sinusoidal	1.65466	6.25051
ENSMUSG00000032966	Fkbp1a	B	FALSE	null	1	NA	TRUE	sigmoid	1.99066	1.355
ENSMUSG00000033066	Gas7	B	FALSE	null	1	NA	TRUE	sinusoidal	1.71537	4.54642
ENSMUSG00000033126	Ybey	B	FALSE	null	1	NA	TRUE	sigmoid	1.56213	19.165
ENSMUSG00000033170	Card10	B	FALSE	sinusoidal	1.29114	1.78103	TRUE	sinusoidal	2.89505	5.19941
ENSMUSG00000033420	Antxr1	B	FALSE	null	1	NA	TRUE	sinusoidal	1.52765	5.5763
ENSMUSG00000033676	Gabrb3	B	FALSE	sinusoidal	1.40942	2.42553	TRUE	sinusoidal	1.49799	2.91234
ENSMUSG00000033715	Akr1c14	B	FALSE	sinusoidal	1.28444	15.649	TRUE	sinusoidal	1.57975	18.2324
ENSMUSG00000033831	Fgb	B	FALSE	null	1	NA	TRUE	sinusoidal	3.67233	1.61602
ENSMUSG00000033857	Engase	B	FALSE	sigmoid	1.46158	11.15	TRUE	sinusoidal	1.61136	8.47427
ENSMUSG00000033860	Fgg	B	FALSE	null	1	NA	TRUE	sinusoidal	1.82651	1.94851
ENSMUSG00000033871	Ppargc1b	B	FALSE	sinusoidal	1.36819	6.33023	TRUE	sigmoid	1.56928	7.49
ENSMUSG00000033961	Zfp446	B	FALSE	null	1	NA	TRUE	sinusoidal	1.69354	5.69516
ENSMUSG00000033970	Rfc3	B	FALSE	sinusoidal	1.32373	4.25901	TRUE	sinusoidal	1.59513	2.29829
ENSMUSG00000033972	Zfp944	B	FALSE	null	1	NA	TRUE	sinusoidal	1.75647	20.3617
ENSMUSG00000034157	2310044G17Rik	B	FALSE	sinusoidal	1.30996	16.606	TRUE	sinusoidal	1.72185	15.2679
ENSMUSG00000034158	Lrrc58	B	FALSE	sinusoidal	1.45518	12.8289	TRUE	sinusoidal	1.61586	13.8923
ENSMUSG00000034164	Emid1	B	FALSE	null	1	NA	TRUE	sinusoidal	1.59443	6.095
ENSMUSG00000034165	Ccnd3	B	FALSE	sinusoidal	1.25738	12.1045	TRUE	sinusoidal	1.62539	11.1565
ENSMUSG00000034192	Lsm3	B	FALSE	null	1	NA	TRUE	sigmoid	1.51111	19.87
ENSMUSG00000034194	R3hcc1	B	FALSE	null	1	NA	TRUE	sinusoidal	1.55527	10.4521
ENSMUSG00000034282	Evpl	B	FALSE	null	1	NA	TRUE	sinusoidal	1.51319	7.37763
ENSMUSG00000034295	Fhod3	B	FALSE	sinusoidal	1.38986	5.71695	TRUE	sinusoidal	1.61539	5.57319
ENSMUSG00000034300	Fam53c	B	FALSE	null	1	NA	TRUE	sinusoidal	1.59789	5.68143
ENSMUSG00000034308	Sdr42e1	B	FALSE	null	1	NA	TRUE	sinusoidal	1.52206	6.83688
ENSMUSG00000034333	Zbed4	B	FALSE	null	1	NA	TRUE	sinusoidal	1.63972	17.5305
ENSMUSG00000034343	Ube2f	B	FALSE	sinusoidal	1.30596	17.4681	TRUE	sinusoidal	1.71964	19.4307
ENSMUSG00000034390	Cmip	B	FALSE	sinusoidal	1.34367	23.7492	TRUE	sinusoidal	1.63198	2.99647
ENSMUSG00000034429	Zfp707	B	FALSE	null	1	NA	TRUE	sinusoidal	1.61432	7.32318
ENSMUSG00000034522	Zfp395	B	FALSE	null	1	NA	TRUE	sinusoidal	1.74638	6.71311
ENSMUSG00000034538	Zfp418	B	FALSE	sinusoidal	1.39319	18.5956	TRUE	sinusoidal	1.77347	20.1884
ENSMUSG00000034607	Pof1b	B	FALSE	null	1	NA	TRUE	sinusoidal	1.91463	0.751892
ENSMUSG00000034640	Tiparp	B	FALSE	null	1	NA	TRUE	sinusoidal	1.53366	19.6441
ENSMUSG00000034664	Itga2b	B	FALSE	null	1	NA	TRUE	sinusoidal	1.63748	10.2135
ENSMUSG00000034799	Unc13a	B	FALSE	null	1	NA	TRUE	sinusoidal	1.80116	5.92293
ENSMUSG00000034825	Nrip3	B	FALSE	null	1	NA	TRUE	sinusoidal	2.88196	4.77028
ENSMUSG00000034993	Vat1	B	FALSE	sinusoidal	1.22326	7.70107	TRUE	sinusoidal	1.56061	7.412
ENSMUSG00000035133	Arhgap5	B	FALSE	null	1	NA	TRUE	sinusoidal	1.50289	20.6939
ENSMUSG00000035161	Ints6	B	FALSE	null	1	NA	TRUE	sinusoidal	1.51155	17.4056
ENSMUSG00000035403	Crb2	B	FALSE	null	1	NA	TRUE	sinusoidal	1.74294	5.59106
ENSMUSG00000035413	Tmem98	B	FALSE	null	1	NA	TRUE	sinusoidal	1.5757	6.24496
ENSMUSG00000035478	Mbd3	B	FALSE	null	1	NA	TRUE	sinusoidal	2.02672	5.53184
ENSMUSG00000035495	Tstd2	B	FALSE	sinusoidal	1.36376	23.9814	TRUE	sinusoidal	1.5107	0.246879
ENSMUSG00000035513	Ntng2	B	FALSE	null	1	NA	TRUE	sinusoidal	1.6475	7.19015
ENSMUSG00000035530	Eif1	B	FALSE	sinusoidal	1.23274	23.6618	TRUE	sigmoid	1.69881	0.61
ENSMUSG00000035621	Midn	B	FALSE	sinusoidal	1.29367	5.83881	TRUE	sinusoidal	1.5399	6.9714
ENSMUSG00000035692	Isg15	B	FALSE	null	1	NA	TRUE	sinusoidal	2.09905	6.14292
ENSMUSG00000035781	R3hdm4	B	FALSE	null	1	NA	TRUE	sinusoidal	1.58825	7.63602
ENSMUSG00000035849	Krt222	B	FALSE	null	1	NA	TRUE	sinusoidal	2.06993	6.74299
ENSMUSG00000035868	3110052M02Rik	B	FALSE	null	1	NA	TRUE	sinusoidal	1.70697	21.3544
ENSMUSG00000035898	Uba6	B	FALSE	sinusoidal	1.25376	20.2322	TRUE	sinusoidal	1.49984	20.0065
ENSMUSG00000035929	H2-Q4	B	FALSE	sinusoidal	1.4299	8.01929	TRUE	sinusoidal	1.77657	8.45081
ENSMUSG00000036002	Fam214b	B	FALSE	null	1	NA	TRUE	sinusoidal	1.56667	9.17848
ENSMUSG00000036057	Ptpn23	B	FALSE	sinusoidal	1.31808	1.8324	TRUE	sinusoidal	1.50919	4.74819
ENSMUSG00000036246	Gmip	B	FALSE	sinusoidal	1.31106	6.85811	TRUE	sinusoidal	1.57429	6.73735
ENSMUSG00000036372	Tmem258	B	FALSE	null	1	NA	TRUE	sinusoidal	1.58578	17.3682
ENSMUSG00000036478	Btg1	B	FALSE	null	1	NA	TRUE	sinusoidal	1.59076	5.11114
ENSMUSG00000036565	Ttyh3	B	FALSE	null	1	NA	TRUE	sinusoidal	1.56763	8.32619
ENSMUSG00000036718	Micall2	B	FALSE	null	1	NA	TRUE	sinusoidal	2.10885	4.77353
ENSMUSG00000036814	Slc6a20a	B	FALSE	sinusoidal	1.38288	13.9723	TRUE	sigmoid	1.78961	13.26
ENSMUSG00000036894	Rap2b	B	FALSE	null	1	NA	TRUE	sinusoidal	2.25123	5.44692
ENSMUSG00000036941	Elac1	B	FALSE	sinusoidal	1.3087	5.93048	TRUE	sinusoidal	1.80484	6.75125
ENSMUSG00000036992	Nxt1	B	FALSE	sinusoidal	1.43324	17.1811	TRUE	sigmoid	1.72456	18.22
ENSMUSG00000036995	Asap3	B	FALSE	sinusoidal	1.22905	3.95931	TRUE	sinusoidal	1.57573	7.05221
ENSMUSG00000037098	Rab11fip3	B	FALSE	sinusoidal	1.33977	4.1645	TRUE	sinusoidal	1.57056	5.19203
ENSMUSG00000037157	Il22ra1	B	FALSE	null	1	NA	TRUE	sigmoid	1.65661	6.18
ENSMUSG00000037259	Dzank1	B	FALSE	null	1	NA	TRUE	sinusoidal	1.77874	5.97066
ENSMUSG00000037415	Ranbp10	B	FALSE	null	1	NA	TRUE	sigmoid	1.52518	2.51
ENSMUSG00000037503	Fam168b	B	FALSE	sinusoidal	1.32708	2.06004	TRUE	sinusoidal	1.5589	16.7315
ENSMUSG00000037536	Fbxo34	B	FALSE	null	1	NA	TRUE	sinusoidal	1.57311	5.07168
ENSMUSG00000037541	Shank2	B	FALSE	sinusoidal	1.42893	1.21579	TRUE	sinusoidal	1.55657	2.48155
ENSMUSG00000037621	Atoh8	B	FALSE	null	1	NA	TRUE	sinusoidal	1.79626	14.4425
ENSMUSG00000037622	Wdtc1	B	FALSE	sinusoidal	1.42199	2.12458	TRUE	sinusoidal	1.65843	3.44493
ENSMUSG00000037669	1110057K04Rik	B	FALSE	sinusoidal	1.33297	19.1215	TRUE	sinusoidal	1.52069	20.326
ENSMUSG00000037977	6430571L13Rik	B	FALSE	null	1	NA	TRUE	sinusoidal	2.25811	7.04478
ENSMUSG00000037989	Wnk2	B	FALSE	sinusoidal	1.44326	6.0304	TRUE	sinusoidal	1.98638	6.74713
ENSMUSG00000037995	Igsf9	B	FALSE	null	1	NA	TRUE	sigmoid	1.62692	7.135
ENSMUSG00000038020	Rapgefl1	B	FALSE	null	1	NA	TRUE	sinusoidal	2.19977	8.04303
ENSMUSG00000038028	9630033F20Rik	B	FALSE	null	1	NA	TRUE	sigmoid	1.60888	1.935
ENSMUSG00000038034	Igsf8	B	FALSE	sinusoidal	1.31593	10.5083	TRUE	sinusoidal	1.67329	9.9473
ENSMUSG00000038068	Rnf144b	B	FALSE	null	1	NA	TRUE	sinusoidal	1.55926	9.83603
ENSMUSG00000038148	Cldn16	B	FALSE	null	1	NA	TRUE	sinusoidal	1.55922	14.4073
ENSMUSG00000038151	Prdm1	B	FALSE	null	1	NA	TRUE	sigmoid	1.74499	6.05
ENSMUSG00000038167	Plekhg6	B	FALSE	sinusoidal	1.47928	6.42186	TRUE	sinusoidal	2.03342	6.60084
ENSMUSG00000038181	Chpf2	B	FALSE	sinusoidal	1.43991	6.64676	TRUE	sinusoidal	1.52772	7.00319
ENSMUSG00000038241	Cep250	B	FALSE	sinusoidal	1.44855	8.29524	TRUE	sinusoidal	1.80605	7.48538
ENSMUSG00000038244	Mical2	B	FALSE	null	1	NA	TRUE	sinusoidal	1.67756	3.25301
ENSMUSG00000038260	Trpm4	B	FALSE	sinusoidal	1.48628	10.8295	TRUE	sigmoid	1.55376	9.78
ENSMUSG00000038383	Pigu	B	FALSE	null	1	NA	TRUE	sinusoidal	1.5151	17.0569
ENSMUSG00000038384	Setd1b	B	FALSE	null	1	NA	TRUE	sinusoidal	2.11908	5.25277
ENSMUSG00000038415	Foxq1	B	FALSE	null	1	NA	TRUE	sinusoidal	1.90431	13.3696
ENSMUSG00000038451	Spsb2	B	FALSE	sinusoidal	1.39835	0.993653	TRUE	sinusoidal	1.49652	3.99855
ENSMUSG00000038453	Srcin1	B	FALSE	null	1	NA	TRUE	sinusoidal	1.71162	4.17972
ENSMUSG00000038473	Nos1ap	B	FALSE	null	1	NA	TRUE	sinusoidal	1.87451	6.15294
ENSMUSG00000038496	Slc19a3	B	FALSE	sinusoidal	1.40058	18.82	TRUE	sinusoidal	1.68072	19.4019
ENSMUSG00000038524	Fchsd1	B	FALSE	sinusoidal	1.48284	3.68248	TRUE	sinusoidal	1.71954	3.91076
ENSMUSG00000038540	Tmc3	B	FALSE	null	1	NA	TRUE	sinusoidal	1.82001	3.30534
ENSMUSG00000038543	BC028528	B	FALSE	null	1	NA	TRUE	sinusoidal	1.68114	15.8643
ENSMUSG00000038637	Lrrc56	B	FALSE	null	1	NA	TRUE	sinusoidal	1.57487	8.72688
ENSMUSG00000038671	Arfrp1	B	FALSE	null	1	NA	TRUE	sigmoid	1.58681	1.05
ENSMUSG00000038677	Scube3	B	FALSE	null	1	NA	TRUE	sinusoidal	1.52382	4.02921
ENSMUSG00000038732	Mboat1	B	FALSE	null	1	NA	TRUE	sinusoidal	1.83954	1.91502
ENSMUSG00000038777	Sema6c	B	FALSE	null	1	NA	TRUE	sigmoid	1.83979	7.735
ENSMUSG00000038797	Zscan2	B	FALSE	sinusoidal	1.44505	4.78635	TRUE	sinusoidal	1.69716	5.456
ENSMUSG00000038872	Zfhx3	B	FALSE	null	1	NA	TRUE	sinusoidal	1.63197	5.63483
ENSMUSG00000038893	Fam117a	B	FALSE	null	1	NA	TRUE	sinusoidal	1.67356	13.0412
ENSMUSG00000038894	Irs2	B	FALSE	null	1	NA	TRUE	sinusoidal	2.34575	7.33599
ENSMUSG00000038895	Zfp653	B	FALSE	null	1	NA	TRUE	sinusoidal	1.52877	7.66126
ENSMUSG00000038963	Slco4a1	B	FALSE	null	1	NA	TRUE	sigmoid	1.86414	14.82
ENSMUSG00000038967	Pdk2	B	FALSE	sinusoidal	1.31175	9.04203	TRUE	sinusoidal	1.57966	8.99058
ENSMUSG00000039005	Tlr4	B	FALSE	null	1	NA	TRUE	sinusoidal	1.50969	20.117
ENSMUSG00000039018	Mtg1	B	FALSE	sinusoidal	1.26916	10.3899	TRUE	sinusoidal	1.54309	6.63318
ENSMUSG00000039159	Ube2h	B	FALSE	null	1	NA	TRUE	sinusoidal	1.58436	6.46792
ENSMUSG00000039239	Tgfb2	B	FALSE	null	1	NA	TRUE	sinusoidal	1.91447	5.01359
ENSMUSG00000039263	Npepl1	B	FALSE	sinusoidal	1.16742	3.90111	TRUE	sinusoidal	1.70561	6.74245
ENSMUSG00000039457	Ppl	B	FALSE	sinusoidal	1.40349	9.40647	TRUE	sinusoidal	1.69783	7.81991
ENSMUSG00000039621	Prex1	B	FALSE	null	1	NA	TRUE	sinusoidal	1.68244	4.42725
ENSMUSG00000039652	Cpeb3	B	FALSE	sinusoidal	1.35018	10.5433	TRUE	sinusoidal	2.00576	9.50444
ENSMUSG00000039686	Zer1	B	FALSE	sinusoidal	1.22226	7.9479	TRUE	sinusoidal	1.66958	7.62511
ENSMUSG00000039717	Ralyl	B	FALSE	null	1	NA	TRUE	sinusoidal	2.66482	17.6533
ENSMUSG00000039781	Azi1	B	FALSE	null	1	NA	TRUE	sigmoid	1.74247	9.42
ENSMUSG00000039904	Gpr37	B	FALSE	null	1	NA	TRUE	sigmoid	1.87856	5.805
ENSMUSG00000039910	Cited2	B	FALSE	sigmoid	1.48891	5.67	TRUE	sigmoid	1.67276	6.4
ENSMUSG00000039917	Rhbdd2	B	FALSE	null	1	NA	TRUE	sinusoidal	1.58269	9.8348
ENSMUSG00000039958	Mettl20	B	FALSE	null	1	NA	TRUE	sinusoidal	1.61907	5.52515
ENSMUSG00000039976	Tbc1d16	B	FALSE	null	1	NA	TRUE	sinusoidal	1.52111	5.2515
ENSMUSG00000039981	Zc3h12d	B	FALSE	null	1	NA	TRUE	sinusoidal	2.14577	5.60465
ENSMUSG00000040270	Bach2	B	FALSE	null	1	NA	TRUE	sinusoidal	1.95503	5.31804
ENSMUSG00000040289	Hey1	B	FALSE	null	1	NA	TRUE	sigmoid	2.28575	15.24
ENSMUSG00000040312	Cchcr1	B	FALSE	null	1	NA	TRUE	sinusoidal	1.81397	6.65073
ENSMUSG00000040428	Plekha4	B	FALSE	null	1	NA	TRUE	sinusoidal	1.87841	8.31446
ENSMUSG00000040429	Mterf	B	FALSE	null	1	NA	TRUE	sinusoidal	1.51189	19.6017
ENSMUSG00000040485	Lrrc52	B	FALSE	null	1	NA	TRUE	sinusoidal	1.86679	16.0595
ENSMUSG00000040524	Zfp609	B	FALSE	null	1	NA	TRUE	sinusoidal	1.68022	5.81397
ENSMUSG00000040594	Ranbp17	B	FALSE	null	1	NA	TRUE	sigmoid	1.84876	11.41
ENSMUSG00000040600	Eps8l3	B	FALSE	null	1	NA	TRUE	sinusoidal	1.91632	7.90579
ENSMUSG00000040613	Apobec1	B	FALSE	null	1	NA	TRUE	sigmoid	1.72257	5.065
ENSMUSG00000040616	Tmem51	B	FALSE	sinusoidal	1.43009	2.29327	TRUE	sinusoidal	1.61462	5.16673
ENSMUSG00000040658	Dnph1	B	FALSE	null	1	NA	TRUE	sinusoidal	1.49533	8.57907
ENSMUSG00000040703	Cyp2s1	B	FALSE	sinusoidal	1.39926	8.01736	TRUE	sinusoidal	1.69543	7.4389
ENSMUSG00000040714	Klc3	B	FALSE	null	1	NA	TRUE	sinusoidal	1.77865	8.34238
ENSMUSG00000040726	Hesx1	B	FALSE	null	1	NA	TRUE	sinusoidal	2.45674	17.3505
ENSMUSG00000040811	Eml2	B	FALSE	sinusoidal	1.27407	9.22134	TRUE	sinusoidal	2.01063	7.07787
ENSMUSG00000040860	Crocc	B	FALSE	null	1	NA	TRUE	sigmoid	1.70666	5.93
ENSMUSG00000040929	Rfx3	B	FALSE	null	1	NA	TRUE	sinusoidal	1.53046	3.6042
ENSMUSG00000040940	Arhgef1	B	FALSE	null	1	NA	TRUE	sinusoidal	1.73525	6.19539
ENSMUSG00000041078	Grid1	B	FALSE	null	1	NA	TRUE	sinusoidal	1.77237	6.84984
ENSMUSG00000041084	Ostc	B	FALSE	sinusoidal	1.42866	20.3368	TRUE	sinusoidal	1.75783	20.3248
ENSMUSG00000041199	Rpusd1	B	FALSE	null	1	NA	TRUE	sinusoidal	1.96443	6.4761
ENSMUSG00000041301	Cftr	B	FALSE	sinusoidal	1.30784	22.4813	TRUE	sinusoidal	1.77526	21.5845
ENSMUSG00000041378	Cldn5	B	FALSE	null	1	NA	TRUE	sinusoidal	1.56505	4.64308
ENSMUSG00000041482	Piezo2	B	FALSE	null	1	NA	TRUE	sinusoidal	1.52887	0.72274
ENSMUSG00000041653	Pnpla3	B	FALSE	null	1	NA	TRUE	sinusoidal	3.3591	3.79089
ENSMUSG00000041679	Lrrc29	B	FALSE	null	1	NA	TRUE	sinusoidal	2.58101	7.70528
ENSMUSG00000041729	Coro2b	B	FALSE	null	1	NA	TRUE	sigmoid	1.58162	3.03
ENSMUSG00000041779	Tram2	B	FALSE	null	1	NA	TRUE	sinusoidal	1.88802	5.06575
ENSMUSG00000041794	Myrip	B	FALSE	null	1	NA	TRUE	sinusoidal	1.61811	13.206
ENSMUSG00000041945	Mfsd9	B	FALSE	sinusoidal	1.41008	10.0489	TRUE	sigmoid	1.55571	12.155
ENSMUSG00000041961	Znrf3	B	FALSE	null	1	NA	TRUE	sinusoidal	1.81177	6.8186
ENSMUSG00000042035	Igsf3	B	FALSE	null	1	NA	TRUE	sinusoidal	1.52077	6.85217
ENSMUSG00000042116	Vwa1	B	FALSE	sinusoidal	1.40767	10.8822	TRUE	sinusoidal	1.64571	11.1943
ENSMUSG00000042190	Cmklr1	B	FALSE	null	1	NA	TRUE	sinusoidal	1.5236	18.7434
ENSMUSG00000042363	Lgalsl	B	FALSE	null	1	NA	TRUE	sinusoidal	1.62263	0.0847307
ENSMUSG00000042390	Gatad2b	B	FALSE	sinusoidal	1.15234	5.24568	TRUE	sinusoidal	1.66049	5.73589
ENSMUSG00000042408	Zmym6	B	FALSE	sinusoidal	1.37635	2.43015	TRUE	sigmoid	1.55902	21.67
ENSMUSG00000042515	Mum1l1	B	FALSE	null	1	NA	TRUE	sinusoidal	1.75593	18.9683
ENSMUSG00000042589	Cux2	B	FALSE	null	1	NA	TRUE	sinusoidal	1.58358	6.64004
ENSMUSG00000042594	Sh2b3	B	FALSE	null	1	NA	TRUE	sinusoidal	1.78576	12.6307
ENSMUSG00000042616	Oscp1	B	FALSE	sinusoidal	1.42396	7.79204	TRUE	sinusoidal	1.51661	7.99063
ENSMUSG00000042644	Itpr3	B	FALSE	sinusoidal	1.32568	11.0248	TRUE	sinusoidal	1.50582	8.5432
ENSMUSG00000042670	Immp1l	B	FALSE	null	1	NA	TRUE	sinusoidal	1.54916	20.14
ENSMUSG00000042675	Ypel3	B	FALSE	sinusoidal	1.42133	5.64225	TRUE	sigmoid	1.50894	7.055
ENSMUSG00000042677	Zc3h12a	B	FALSE	null	1	NA	TRUE	sinusoidal	1.74127	7.88277
ENSMUSG00000042766	Trim46	B	FALSE	null	1	NA	TRUE	sinusoidal	2.83445	9.87553
ENSMUSG00000042784	Muc1	B	FALSE	null	1	NA	TRUE	sinusoidal	1.62926	14.5995
ENSMUSG00000042842	Serpinb6b	B	FALSE	sinusoidal	1.48891	21.8983	TRUE	sinusoidal	1.54058	20.7335
ENSMUSG00000042903	Foxo4	B	FALSE	null	1	NA	TRUE	sinusoidal	1.6199	5.75709
ENSMUSG00000043059	Zfp513	B	FALSE	null	1	NA	TRUE	sinusoidal	1.49645	8.27477
ENSMUSG00000043091	Tuba1c	B	FALSE	sinusoidal	1.33095	19.7861	TRUE	sigmoid	1.58953	18.08
ENSMUSG00000043259	Fam13c	B	FALSE	null	1	NA	TRUE	sinusoidal	1.88832	4.79277
ENSMUSG00000043323	Fbrsl1	B	FALSE	sinusoidal	1.4097	3.30458	TRUE	sinusoidal	1.57218	5.71803
ENSMUSG00000043372	Hexim2	B	FALSE	null	1	NA	TRUE	sinusoidal	1.65814	6.26502
ENSMUSG00000043621	Ubxn10	B	FALSE	null	1	NA	TRUE	sinusoidal	1.69621	8.7813
ENSMUSG00000043664	Tmem221	B	FALSE	null	1	NA	TRUE	sinusoidal	2.12527	9.21332
ENSMUSG00000043782	Ccdc64b	B	FALSE	null	1	NA	TRUE	sinusoidal	1.57861	3.91211
ENSMUSG00000043969	Emx2	B	FALSE	null	1	NA	TRUE	sigmoid	1.71894	0.69
ENSMUSG00000044134	Fam109a	B	FALSE	null	1	NA	TRUE	sinusoidal	1.60878	5.66454
ENSMUSG00000044197	Gpr146	B	FALSE	null	1	NA	TRUE	sigmoid	1.6104	5.77
ENSMUSG00000044250	Pced1b	B	FALSE	null	1	NA	TRUE	sinusoidal	1.64551	7.21005
ENSMUSG00000044328	Trp53i13	B	FALSE	sinusoidal	1.47268	8.97308	TRUE	sinusoidal	1.62696	8.18242
ENSMUSG00000044442	N6amt1	B	FALSE	sinusoidal	1.42553	8.0209	TRUE	sinusoidal	1.61772	7.7042
ENSMUSG00000044562	Rasip1	B	FALSE	sinusoidal	1.37748	10.149	TRUE	sinusoidal	1.61379	9.55212
ENSMUSG00000044763	Trmt10c	B	FALSE	null	1	NA	TRUE	sinusoidal	1.69492	19.2518
ENSMUSG00000045094	Arhgef37	B	FALSE	null	1	NA	TRUE	sinusoidal	2.12983	20.9336
ENSMUSG00000045211	Nudt18	B	FALSE	null	1	NA	TRUE	sinusoidal	2.39705	5.75464
ENSMUSG00000045287	Rtn4rl1	B	FALSE	null	1	NA	TRUE	sinusoidal	1.89282	6.25235
ENSMUSG00000045392	Olfr1033	B	FALSE	null	1	NA	TRUE	sinusoidal	1.9466	18.9012
ENSMUSG00000045519	Zfp560	B	FALSE	null	1	NA	TRUE	sinusoidal	1.61707	21.5637
ENSMUSG00000045629	Sh3tc2	B	FALSE	sinusoidal	1.49499	23.5907	TRUE	sinusoidal	1.50928	0.69962
ENSMUSG00000045671	Spred2	B	FALSE	null	1	NA	TRUE	sinusoidal	1.65606	4.45763
ENSMUSG00000045690	Wdr89	B	FALSE	null	1	NA	TRUE	sinusoidal	1.57256	5.2902
ENSMUSG00000045827	Serpinb9	B	FALSE	sinusoidal	1.44114	0.0658162	TRUE	sinusoidal	1.6258	23.6064
ENSMUSG00000045838	A430105I19Rik	B	FALSE	null	1	NA	TRUE	sinusoidal	1.52619	10.4396
ENSMUSG00000045871	Slitrk6	B	FALSE	null	1	NA	TRUE	sinusoidal	1.72481	16.443
ENSMUSG00000045969	Ing1	B	FALSE	null	1	NA	TRUE	sinusoidal	1.5786	7.79553
ENSMUSG00000045996	Polr2k	B	FALSE	null	1	NA	TRUE	sigmoid	1.53327	18.515
ENSMUSG00000046093	Hpcal4	B	FALSE	null	1	NA	TRUE	sinusoidal	2.3348	7.55135
ENSMUSG00000046213	Cym	B	FALSE	null	1	NA	TRUE	sinusoidal	1.66561	10.7516
ENSMUSG00000046230	Vps13a	B	FALSE	sinusoidal	1.28231	18.0639	TRUE	sinusoidal	1.53063	18.8122
ENSMUSG00000046351	Zfp322a	B	FALSE	null	1	NA	TRUE	sinusoidal	1.5933	20.5279
ENSMUSG00000046434	Hnrnpa1	B	FALSE	sinusoidal	1.2298	9.94578	TRUE	sinusoidal	1.79327	8.63672
ENSMUSG00000046556	Zfp319	B	FALSE	null	1	NA	TRUE	sinusoidal	1.49639	8.30082
ENSMUSG00000046573	Lyrm4	B	FALSE	null	1	NA	TRUE	sigmoid	1.79439	18.8
ENSMUSG00000046574	Prr12	B	FALSE	sinusoidal	1.23593	6.08192	TRUE	sinusoidal	1.68656	7.01781
ENSMUSG00000046589	Lrrc8e	B	FALSE	null	1	NA	TRUE	sinusoidal	2.53893	5.10334
ENSMUSG00000046658	Zfp316	B	FALSE	null	1	NA	TRUE	sinusoidal	1.70989	7.17723
ENSMUSG00000046711	Hmga1	B	FALSE	sinusoidal	1.39143	8.01103	TRUE	sinusoidal	1.7081	8.81513
ENSMUSG00000046718	Bst2	B	FALSE	null	1	NA	TRUE	sinusoidal	1.5041	5.55397
ENSMUSG00000046876	Atxn1	B	FALSE	null	1	NA	TRUE	sinusoidal	1.51714	8.64488
ENSMUSG00000046962	Zbtb21	B	FALSE	sinusoidal	1.47994	19.4846	TRUE	sinusoidal	1.62572	19.7814
ENSMUSG00000047003	Zfp41	B	FALSE	null	1	NA	TRUE	sinusoidal	1.581	3.56193
ENSMUSG00000047090	Tmem198b	B	FALSE	null	1	NA	TRUE	sigmoid	1.80021	7.89
ENSMUSG00000047180	Neurl3	B	FALSE	null	1	NA	TRUE	sinusoidal	2.96945	4.59073
ENSMUSG00000047246	Hist1h2be	B	FALSE	null	1	NA	TRUE	sinusoidal	1.56381	12.4542
ENSMUSG00000047423	AI837181	B	FALSE	null	1	NA	TRUE	sinusoidal	1.71749	6.65134
ENSMUSG00000047496	Rnf152	B	FALSE	null	1	NA	TRUE	sinusoidal	1.52628	6.76394
ENSMUSG00000047554	Tmem41b	B	FALSE	null	1	NA	TRUE	sinusoidal	1.54076	18.6899
ENSMUSG00000047730	Fcgbp	B	FALSE	null	1	NA	TRUE	sinusoidal	1.53723	8.04546
ENSMUSG00000047810	Ccdc88b	B	FALSE	null	1	NA	TRUE	sinusoidal	1.65736	7.50182
ENSMUSG00000047843	Bri3	B	FALSE	null	1	NA	TRUE	sigmoid	1.49692	12.585
ENSMUSG00000047861	Foxi1	B	FALSE	null	1	NA	TRUE	sinusoidal	1.6801	14.5055
ENSMUSG00000047881	Rell1	B	FALSE	sinusoidal	1.40319	7.03557	TRUE	sinusoidal	1.70496	7.79856
ENSMUSG00000048096	Lmod1	B	FALSE	null	1	NA	TRUE	sigmoid	1.67433	13.96
ENSMUSG00000048106	4632415L05Rik	B	FALSE	null	1	NA	TRUE	sinusoidal	1.5277	7.72613
ENSMUSG00000048200	Efcab4a	B	FALSE	null	1	NA	TRUE	sinusoidal	1.54116	8.63515
ENSMUSG00000048251	Bcl11b	B	FALSE	null	1	NA	TRUE	sigmoid	1.62812	5.385
ENSMUSG00000048281	Dleu7	B	FALSE	sinusoidal	1.47758	20.8061	TRUE	sinusoidal	1.57921	17.7655
ENSMUSG00000048387	Osr1	B	FALSE	null	1	NA	TRUE	sinusoidal	1.68434	19.5746
ENSMUSG00000048424	Ranbp3l	B	FALSE	null	1	NA	TRUE	sigmoid	1.51361	17.075
ENSMUSG00000048482	Bdnf	B	FALSE	null	1	NA	TRUE	sinusoidal	1.57873	8.88866
ENSMUSG00000048756	Foxo3	B	FALSE	sinusoidal	1.34587	12.1438	TRUE	sinusoidal	1.61884	10.6146
ENSMUSG00000048763	Hoxb3	B	FALSE	null	1	NA	TRUE	sinusoidal	1.68179	9.36835
ENSMUSG00000048796	Cyb561d1	B	FALSE	null	1	NA	TRUE	sinusoidal	2.33017	7.17128
ENSMUSG00000049086	Bmyc	B	FALSE	sinusoidal	1.38424	7.0969	TRUE	sigmoid	1.66925	6.715
ENSMUSG00000049090	Zadh2	B	FALSE	null	1	NA	TRUE	sinusoidal	1.51185	5.93635
ENSMUSG00000049134	Nrap	B	FALSE	null	1	NA	TRUE	sinusoidal	1.99714	8.78096
ENSMUSG00000049164	Zfp518a	B	FALSE	null	1	NA	TRUE	sinusoidal	1.49913	21.6501
ENSMUSG00000049285	Mblac1	B	FALSE	null	1	NA	TRUE	sinusoidal	1.58346	7.01893
ENSMUSG00000049299	Trappc1	B	FALSE	null	1	NA	TRUE	sigmoid	1.68021	18.135
ENSMUSG00000049555	Tmie	B	FALSE	null	1	NA	TRUE	sinusoidal	1.69429	3.60969
ENSMUSG00000049580	Tsku	B	FALSE	null	1	NA	TRUE	sinusoidal	1.85855	13.0319
ENSMUSG00000049643	2310022A10Rik	B	FALSE	null	1	NA	TRUE	sinusoidal	1.8741	5.79163
ENSMUSG00000049823	Zbtb12	B	FALSE	null	1	NA	TRUE	sinusoidal	1.82714	7.32851
ENSMUSG00000049892	Rasd1	B	FALSE	null	1	NA	TRUE	sinusoidal	4.61975	6.57961
ENSMUSG00000049907	Rasl11b	B	FALSE	null	1	NA	TRUE	sinusoidal	1.52516	5.41873
ENSMUSG00000049929	Lpar4	B	FALSE	null	1	NA	TRUE	sigmoid	2.76926	20.995
ENSMUSG00000049932	H2afx	B	FALSE	null	1	NA	TRUE	sinusoidal	1.73584	7.36627
ENSMUSG00000050017	Pitpnb	B	FALSE	null	1	NA	TRUE	sinusoidal	1.73661	5.24401
ENSMUSG00000050022	Amz1	B	FALSE	null	1	NA	TRUE	sinusoidal	2.1417	7.64729
ENSMUSG00000050556	Kcnb1	B	FALSE	null	1	NA	TRUE	sinusoidal	1.51316	10.3331
ENSMUSG00000050677	Ccdc96	B	FALSE	null	1	NA	TRUE	sigmoid	1.72016	9.92
ENSMUSG00000050866	Clrn3	B	FALSE	sinusoidal	1.31448	20.1202	TRUE	sigmoid	1.7859	19.105
ENSMUSG00000050910	Cdr2l	B	FALSE	null	1	NA	TRUE	sigmoid	1.49828	8.01
ENSMUSG00000050919	Zfp366	B	FALSE	sinusoidal	1.36254	17.6337	TRUE	sigmoid	1.60997	14.4
ENSMUSG00000051550	Zfp579	B	FALSE	null	1	NA	TRUE	sigmoid	1.53765	7.22
ENSMUSG00000051671	Coa6	B	FALSE	null	1	NA	TRUE	sinusoidal	1.52334	14.975
ENSMUSG00000051695	Pcbp1	B	FALSE	sinusoidal	1.23556	21.7919	TRUE	sinusoidal	1.55608	5.05361
ENSMUSG00000051817	Sox12	B	FALSE	null	1	NA	TRUE	sinusoidal	1.50922	7.90388
ENSMUSG00000051853	Arf3	B	FALSE	null	1	NA	TRUE	sinusoidal	1.74837	5.6959
ENSMUSG00000052423	B4galt3	B	FALSE	null	1	NA	TRUE	sinusoidal	1.66315	16.0746
ENSMUSG00000052485	Tmem171	B	FALSE	null	1	NA	TRUE	sinusoidal	1.62252	23.5815
ENSMUSG00000052776	Oas1a	B	FALSE	null	1	NA	TRUE	sinusoidal	1.80014	5.25569
ENSMUSG00000052821	Cysltr1	B	FALSE	null	1	NA	TRUE	sigmoid	2.20391	19.765
ENSMUSG00000053080	2700081O15Rik	B	FALSE	null	1	NA	TRUE	sinusoidal	1.62903	10.1452
ENSMUSG00000053128	Rnf26	B	FALSE	null	1	NA	TRUE	sinusoidal	1.60447	6.64972
ENSMUSG00000053168	9030619P08Rik	B	FALSE	null	1	NA	TRUE	sinusoidal	1.98297	18.5827
ENSMUSG00000053411	Cbx7	B	FALSE	null	1	NA	TRUE	sinusoidal	1.54276	7.15446
ENSMUSG00000053553	3110082I17Rik	B	FALSE	sinusoidal	1.47043	4.54588	TRUE	sinusoidal	2.10172	6.73391
ENSMUSG00000053559	Smagp	B	FALSE	sinusoidal	1.35421	7.57771	TRUE	sigmoid	1.5469	10.51
ENSMUSG00000053684	BC048403	B	FALSE	null	1	NA	TRUE	sinusoidal	1.73746	7.27078
ENSMUSG00000053716	Dusp7	B	FALSE	sinusoidal	1.47962	11.8681	TRUE	sinusoidal	1.77081	12.1757
ENSMUSG00000053870	Fpgt	B	FALSE	null	1	NA	TRUE	sinusoidal	1.50384	18.6564
ENSMUSG00000053985	Zfp14	B	FALSE	null	1	NA	TRUE	sigmoid	1.59851	17.825
ENSMUSG00000054150	Syne3	B	FALSE	null	1	NA	TRUE	sinusoidal	1.86383	7.42637
ENSMUSG00000054385	Ceacam2	B	FALSE	null	1	NA	TRUE	sinusoidal	1.57235	18.2693
ENSMUSG00000054499	Dedd2	B	FALSE	null	1	NA	TRUE	sinusoidal	1.50452	8.93394
ENSMUSG00000054675	Tmem119	B	FALSE	null	1	NA	TRUE	sigmoid	1.68721	13.855
ENSMUSG00000054723	Vmac	B	FALSE	null	1	NA	TRUE	sinusoidal	1.61646	8.53762
ENSMUSG00000054855	Rnd1	B	FALSE	null	1	NA	TRUE	sinusoidal	2.28748	5.92327
ENSMUSG00000055148	Klf2	B	FALSE	sinusoidal	1.39843	15.2311	TRUE	sigmoid	1.92225	13.61
ENSMUSG00000055421	Pcdh9	B	FALSE	null	1	NA	TRUE	sigmoid	2.08265	15.715
ENSMUSG00000055471	Alk	B	FALSE	null	1	NA	TRUE	sinusoidal	3.27579	13.1971
ENSMUSG00000055493	Epm2a	B	FALSE	null	1	NA	TRUE	sigmoid	1.62454	11.665
ENSMUSG00000055639	Dach1	B	FALSE	sinusoidal	1.37661	6.24086	TRUE	sinusoidal	1.51761	6.44139
ENSMUSG00000055675	Kbtbd11	B	FALSE	null	1	NA	TRUE	sinusoidal	1.59335	5.40842
ENSMUSG00000055692	Tmem191c	B	FALSE	null	1	NA	TRUE	sinusoidal	1.95552	11.2512
ENSMUSG00000055707	Klhl26	B	FALSE	null	1	NA	TRUE	sinusoidal	1.58428	6.31699
ENSMUSG00000055805	Fmnl1	B	FALSE	sigmoid	1.42295	10.12	TRUE	sinusoidal	1.71311	9.36064
ENSMUSG00000056493	Foxk1	B	FALSE	sigmoid	1.39601	5.285	TRUE	sigmoid	1.52336	7.005
ENSMUSG00000056553	Ptprn2	B	FALSE	null	1	NA	TRUE	sigmoid	1.98074	15.555
ENSMUSG00000056648	Hoxb8	B	FALSE	null	1	NA	TRUE	sinusoidal	1.8109	5.92603
ENSMUSG00000056724	Nbeal2	B	FALSE	sinusoidal	1.38389	10.7148	TRUE	sinusoidal	1.58596	8.32938
ENSMUSG00000056755	Grm7	B	FALSE	null	1	NA	TRUE	sinusoidal	1.59181	6.06296
ENSMUSG00000056851	Pcbp2	B	FALSE	null	1	NA	TRUE	sinusoidal	1.50842	4.87699
ENSMUSG00000057069	Ero1lb	B	FALSE	sigmoid	1.36871	17.285	TRUE	sinusoidal	1.56218	19.7652
ENSMUSG00000057842	Zfp595	B	FALSE	null	1	NA	TRUE	sinusoidal	1.5947	20.7293
ENSMUSG00000058022	Adtrp	B	FALSE	null	1	NA	TRUE	sinusoidal	1.49741	16.8288
ENSMUSG00000058207	Serpina3k	B	FALSE	null	1	NA	TRUE	sinusoidal	3.65764	1.16747
ENSMUSG00000058883	Zfp708	B	FALSE	null	1	NA	TRUE	sinusoidal	1.59189	20.776
ENSMUSG00000059005	Hnrnpa3	B	FALSE	sinusoidal	1.26136	0.181264	TRUE	sinusoidal	1.63489	3.84573
ENSMUSG00000059013	Sh2d3c	B	FALSE	null	1	NA	TRUE	sinusoidal	1.66349	8.86277
ENSMUSG00000059146	Ntrk3	B	FALSE	sinusoidal	1.43173	0.371921	TRUE	sinusoidal	1.55009	1.99153
ENSMUSG00000059326	Csf2ra	B	FALSE	null	1	NA	TRUE	sinusoidal	1.67643	6.80477
ENSMUSG00000059355	BC056474	B	FALSE	null	1	NA	TRUE	sigmoid	1.53677	18.12
ENSMUSG00000059475	Zfp426	B	FALSE	null	1	NA	TRUE	sinusoidal	1.54979	21.4592
ENSMUSG00000059481	Plg	B	FALSE	null	1	NA	TRUE	sinusoidal	3.35874	4.06774
ENSMUSG00000059923	Grb2	B	FALSE	sinusoidal	1.21895	3.57488	TRUE	sigmoid	1.72739	1.755
ENSMUSG00000060063	Alox5ap	B	FALSE	null	1	NA	TRUE	sinusoidal	1.58594	15.3496
ENSMUSG00000060288	Ppih	B	FALSE	null	1	NA	TRUE	sinusoidal	1.51609	22.3746
ENSMUSG00000060373	Hnrnpc	B	FALSE	sinusoidal	1.34093	23.6343	TRUE	sigmoid	1.5906	1.975
ENSMUSG00000060477	Irak2	B	FALSE	sigmoid	1.27336	7.805	TRUE	sinusoidal	1.49857	5.65085
ENSMUSG00000060510	Zfp266	B	FALSE	sigmoid	1.27081	23.42	TRUE	sinusoidal	1.53253	20.8368
ENSMUSG00000060519	Tor3a	B	FALSE	null	1	NA	TRUE	sinusoidal	1.68034	5.73707
ENSMUSG00000061273	Mmgt1	B	FALSE	null	1	NA	TRUE	sigmoid	1.68372	20.585
ENSMUSG00000061371	Zfp873	B	FALSE	null	1	NA	TRUE	sinusoidal	1.64822	21.3437
ENSMUSG00000061474	Mrps36	B	FALSE	null	1	NA	TRUE	sinusoidal	1.63983	17.1087
ENSMUSG00000062012	Zfp13	B	FALSE	null	1	NA	TRUE	sinusoidal	1.52525	6.84836
ENSMUSG00000062248	Cks2	B	FALSE	null	1	NA	TRUE	sinusoidal	1.72664	19.148
ENSMUSG00000062480	Acat3	B	FALSE	null	1	NA	TRUE	sinusoidal	1.59018	13.6031
ENSMUSG00000062563	Cys1	B	FALSE	null	1	NA	TRUE	sinusoidal	1.62634	8.40139
ENSMUSG00000062683	Atp5g2	B	FALSE	null	1	NA	TRUE	sinusoidal	1.67352	15.0442
ENSMUSG00000063171	Rps4y2	B	FALSE	sinusoidal	1.41707	2.90501	TRUE	sinusoidal	1.52772	5.21599
ENSMUSG00000063415	Cyp26b1	B	FALSE	null	1	NA	TRUE	sinusoidal	4.08662	2.41287
ENSMUSG00000063439	B9d2	B	FALSE	null	1	NA	TRUE	sinusoidal	2.09801	6.07023
ENSMUSG00000063590	Slc22a28	B	FALSE	null	1	NA	TRUE	sinusoidal	1.56457	22.3868
ENSMUSG00000064043	Trerf1	B	FALSE	null	1	NA	TRUE	sinusoidal	1.69875	7.13647
ENSMUSG00000064061	Dzip3	B	FALSE	null	1	NA	TRUE	sigmoid	1.54315	20.305
ENSMUSG00000064247	Plcxd1	B	FALSE	null	1	NA	TRUE	sinusoidal	2.03458	7.17056
ENSMUSG00000064341	mt-Nd1	B	FALSE	null	1	NA	TRUE	sigmoid	1.52502	20.935
ENSMUSG00000064345	mt-Nd2	B	FALSE	null	1	NA	TRUE	sinusoidal	1.56623	17.0363
ENSMUSG00000064354	mt-Co2	B	FALSE	null	1	NA	TRUE	sigmoid	1.54485	21.23
ENSMUSG00000064356	mt-Atp8	B	FALSE	null	1	NA	TRUE	sinusoidal	1.87264	16.8993
ENSMUSG00000064357	mt-Atp6	B	FALSE	null	1	NA	TRUE	sigmoid	1.72794	20.85
ENSMUSG00000064358	mt-Co3	B	FALSE	sinusoidal	1.48395	15.1211	TRUE	sigmoid	1.50396	20.725
ENSMUSG00000064360	mt-Nd3	B	FALSE	null	1	NA	TRUE	sinusoidal	2.26471	18.0138
ENSMUSG00000066154	Mup3	B	FALSE	null	1	NA	TRUE	sigmoid	4.7358	0.405
ENSMUSG00000066319	Rtp3	B	FALSE	null	1	NA	TRUE	sinusoidal	1.51665	23.4801
ENSMUSG00000066357	Wdr6	B	FALSE	sigmoid	1.32837	9.65	TRUE	sinusoidal	1.58225	6.36347
ENSMUSG00000066366	Serpina1a	B	FALSE	null	1	NA	TRUE	sigmoid	3.24337	15.725
ENSMUSG00000066797	Zfp648	B	FALSE	null	1	NA	TRUE	sigmoid	2.07604	15.555
ENSMUSG00000067071	Hes6	B	FALSE	null	1	NA	TRUE	sinusoidal	1.63975	9.58415
ENSMUSG00000067158	Col4a4	B	FALSE	null	1	NA	TRUE	sigmoid	1.554	1.345
ENSMUSG00000067297	2010002M12Rik	B	FALSE	null	1	NA	TRUE	sinusoidal	1.88264	23.0396
ENSMUSG00000068114	Ccdc134	B	FALSE	null	1	NA	TRUE	sinusoidal	1.57303	17.4055
ENSMUSG00000068299	1700019G17Rik	B	FALSE	null	1	NA	TRUE	sigmoid	1.76834	6.995
ENSMUSG00000069919	Hba-a1	B	FALSE	null	1	NA	TRUE	sigmoid	3.47331	15.73
ENSMUSG00000070407	Hs3st3b1	B	FALSE	null	1	NA	TRUE	sinusoidal	1.57242	8.9365
ENSMUSG00000070473	Cldn3	B	FALSE	null	1	NA	TRUE	sinusoidal	1.63342	6.53449
ENSMUSG00000070867	Trabd2b	B	FALSE	null	1	NA	TRUE	sinusoidal	1.70724	5.89642
ENSMUSG00000070934	Rraga	B	FALSE	null	1	NA	TRUE	sigmoid	1.70069	1.155
ENSMUSG00000070942	Il1rl2	B	FALSE	null	1	NA	TRUE	sinusoidal	1.65943	5.48084
ENSMUSG00000071078	Nr2c2ap	B	FALSE	sinusoidal	1.40257	18.986	TRUE	sinusoidal	1.54693	4.95875
ENSMUSG00000071669	Snx29	B	FALSE	sinusoidal	1.4502	0.607569	TRUE	sinusoidal	1.7639	1.68172
ENSMUSG00000071847	Apcdd1	B	FALSE	null	1	NA	TRUE	sinusoidal	1.81621	10.5589
ENSMUSG00000072494	Ppp1r3e	B	FALSE	null	1	NA	TRUE	sinusoidal	1.9648	7.08968
ENSMUSG00000072623	Zfp9	B	FALSE	null	1	NA	TRUE	sinusoidal	1.80681	3.1284
ENSMUSG00000072849	Serpina1e	B	FALSE	null	1	NA	TRUE	sinusoidal	4.14573	2.15772
ENSMUSG00000073096	Lrrc61	B	FALSE	sigmoid	1.41144	4.325	TRUE	sinusoidal	1.99628	5.99791
ENSMUSG00000073427	Gm4924	B	FALSE	null	1	NA	TRUE	sinusoidal	1.65288	22.393
ENSMUSG00000073434	Wdr90	B	FALSE	sinusoidal	1.4218	8.9904	TRUE	sinusoidal	1.53978	6.87564
ENSMUSG00000073684	2610002J02Rik	B	FALSE	null	1	NA	TRUE	sinusoidal	1.63135	12.2229
ENSMUSG00000073968	Trim68	B	FALSE	null	1	NA	TRUE	sigmoid	1.51219	6.16
ENSMUSG00000073982	Rhog	B	FALSE	null	1	NA	TRUE	sinusoidal	1.54507	7.35116
ENSMUSG00000073988	Ttpa	B	FALSE	sinusoidal	1.46212	13.4467	TRUE	sinusoidal	1.71222	14.7859
ENSMUSG00000074060	Fbxw15	B	FALSE	null	1	NA	TRUE	sinusoidal	2.1961	18.3603
ENSMUSG00000074141	Il4i1	B	FALSE	null	1	NA	TRUE	sinusoidal	2.33072	5.65121
ENSMUSG00000074277	Phldb3	B	FALSE	null	1	NA	TRUE	sinusoidal	1.5428	6.1385
ENSMUSG00000074403	Hist2h3b	B	FALSE	null	1	NA	TRUE	sinusoidal	2.1742	10.5669
ENSMUSG00000074406	Zfp628	B	FALSE	null	1	NA	TRUE	sigmoid	1.65994	7.24
ENSMUSG00000074579	Lekr1	B	FALSE	null	1	NA	TRUE	sinusoidal	1.61167	21.1566
ENSMUSG00000074735	Gm21994	B	FALSE	null	1	NA	TRUE	sinusoidal	1.784	20.6705
ENSMUSG00000074768	Bhmt	B	FALSE	null	1	NA	TRUE	sinusoidal	2.65888	2.12113
ENSMUSG00000075044	Slc22a29	B	FALSE	null	1	NA	TRUE	sinusoidal	1.56614	16.8346
ENSMUSG00000075225	Ccdc162	B	FALSE	null	1	NA	TRUE	sinusoidal	1.76825	5.85531
ENSMUSG00000075271	Ttc30a1	B	FALSE	sinusoidal	1.40105	23.7287	TRUE	sinusoidal	1.50923	22.3346
ENSMUSG00000075415	Fnbp1	B	FALSE	null	1	NA	TRUE	sinusoidal	1.74352	5.28372
ENSMUSG00000075478	Slitrk1	B	FALSE	null	1	NA	TRUE	sinusoidal	2.7624	1.04086
ENSMUSG00000076435	Acsf2	B	FALSE	null	1	NA	TRUE	sinusoidal	1.75737	7.40402
ENSMUSG00000077450	Rab11b	B	FALSE	sinusoidal	1.36246	5.50561	TRUE	sinusoidal	1.78809	5.78219
ENSMUSG00000078302	Foxd1	B	FALSE	null	1	NA	TRUE	sinusoidal	1.84915	10.1193
ENSMUSG00000078566	Bnip3	B	FALSE	sinusoidal	1.31814	13.4671	TRUE	sinusoidal	1.61315	15.6239
ENSMUSG00000078572	1810043H04Rik	B	FALSE	null	1	NA	TRUE	sinusoidal	1.64669	11.9616
ENSMUSG00000078672	Mup20	B	FALSE	null	1	NA	TRUE	sigmoid	3.29186	0.735
ENSMUSG00000078784	1810022K09Rik	B	FALSE	null	1	NA	TRUE	sigmoid	1.56682	17.635
ENSMUSG00000078974	Sec61g	B	FALSE	null	1	NA	TRUE	sinusoidal	1.61321	19.2207
ENSMUSG00000079002	C030006K11Rik	B	FALSE	sinusoidal	1.2327	12.0712	TRUE	sinusoidal	1.66779	13.2576
ENSMUSG00000079043	Fastkd5	B	FALSE	null	1	NA	TRUE	sinusoidal	1.61459	18.7493
ENSMUSG00000079111	Kdelr2	B	FALSE	sinusoidal	1.34933	17.335	TRUE	sinusoidal	1.57483	17.4132
ENSMUSG00000079254	Itprip	B	FALSE	sinusoidal	1.40447	9.53661	TRUE	sinusoidal	1.67082	9.96851
ENSMUSG00000079437	Tmem179b	B	FALSE	null	1	NA	TRUE	sinusoidal	1.49803	16.2793
ENSMUSG00000079471	Gm7325	B	FALSE	null	1	NA	TRUE	sinusoidal	2.91875	14.3827
ENSMUSG00000079477	Rab7	B	FALSE	null	1	NA	TRUE	sigmoid	1.51176	1.265
ENSMUSG00000079523	Tmsb10	B	FALSE	null	1	NA	TRUE	sinusoidal	1.81512	3.66213
ENSMUSG00000083649	Rasl2-9	B	FALSE	null	1	NA	TRUE	sinusoidal	2.13736	5.018
ENSMUSG00000085795	Zfp703	B	FALSE	null	1	NA	TRUE	sinusoidal	1.72967	7.80409
ENSMUSG00000086040	Wipf3	B	FALSE	null	1	NA	TRUE	sinusoidal	2.57226	6.08875
ENSMUSG00000086596	Susd5	B	FALSE	null	1	NA	TRUE	sigmoid	2.97063	3.39
ENSMUSG00000089682	Bcl2l2	B	FALSE	null	1	NA	TRUE	sinusoidal	1.53597	12.4872
ENSMUSG00000089687	Rab42	B	FALSE	null	1	NA	TRUE	sinusoidal	1.73472	8.84318
ENSMUSG00000090264	Eif4ebp3	B	FALSE	null	1	NA	TRUE	sinusoidal	2.53974	11.952
ENSMUSG00000090659	Zfp493	B	FALSE	null	1	NA	TRUE	sinusoidal	1.9907	20.9405
ENSMUSG00000092192	Dyx1c1	B	FALSE	null	1	NA	TRUE	sinusoidal	1.88375	6.97791
ENSMUSG00000092416	Zfp141	B	FALSE	null	1	NA	TRUE	sinusoidal	1.57379	21.1109
ENSMUSG00000095300	Gm906	B	FALSE	null	1	NA	TRUE	sigmoid	1.83342	14.705
ENSMUSG00000096546	Smlr1	B	FALSE	null	1	NA	TRUE	sinusoidal	1.61259	16.4357
ENSMUSG00000097341	Gm26616	B	FALSE	null	1	NA	TRUE	sinusoidal	2.09561	11.5266
ENSMUSG00000098615	ARVCF	B	FALSE	null	1	NA	TRUE	sinusoidal	2.23637	5.09484
ENSMUSG00000098789	Jmjd7	B	FALSE	null	1	NA	TRUE	sinusoidal	2.23041	7.93475
ENSMUSG00000000295	Hddc2	C	TRUE	sigmoid	1.55683	15.215	FALSE	null	1	NA
ENSMUSG00000000942	Hoxa4	C	TRUE	sinusoidal	1.75743	18.7957	FALSE	null	1	NA
ENSMUSG00000001025	S100a6	C	TRUE	sinusoidal	1.51716	6.70111	FALSE	null	1	NA
ENSMUSG00000001119	Col6a1	C	TRUE	sigmoid	1.78656	15.765	FALSE	sigmoid	1.44455	15.4
ENSMUSG00000001520	Nrip2	C	TRUE	sinusoidal	1.5612	6.12533	FALSE	null	1	NA
ENSMUSG00000001627	Ifrd1	C	TRUE	sigmoid	1.78161	14.035	FALSE	sinusoidal	1.18655	16.6456
ENSMUSG00000002059	Rab34	C	TRUE	sinusoidal	1.50763	12.2242	FALSE	sinusoidal	1.48653	12.3992
ENSMUSG00000002104	Rapsn	C	TRUE	sinusoidal	1.62546	2.85265	FALSE	null	1	NA
ENSMUSG00000002105	Slc39a13	C	TRUE	sigmoid	1.55116	15.89	FALSE	null	1	NA
ENSMUSG00000002109	Ddb2	C	TRUE	sigmoid	1.81465	13.205	FALSE	null	1	NA
ENSMUSG00000002297	Dbf4	C	TRUE	sigmoid	1.86792	4.845	FALSE	null	1	NA
ENSMUSG00000002343	Armc6	C	TRUE	sinusoidal	1.63288	18.8133	FALSE	null	1	NA
ENSMUSG00000002504	Slc9a3r2	C	TRUE	sigmoid	1.52803	15.645	FALSE	sigmoid	1.46153	13.975
ENSMUSG00000002625	Akap8l	C	TRUE	sinusoidal	1.81574	19.1221	FALSE	null	1	NA
ENSMUSG00000002699	Lcp2	C	TRUE	sinusoidal	1.63996	4.09153	FALSE	null	1	NA
ENSMUSG00000002908	Kcnn1	C	TRUE	sinusoidal	1.89087	0.498501	FALSE	null	1	NA
ENSMUSG00000002997	Prkar2b	C	TRUE	sinusoidal	1.61135	5.94403	FALSE	null	1	NA
ENSMUSG00000003617	Cp	C	TRUE	sigmoid	1.53156	15.83	FALSE	null	1	NA
ENSMUSG00000004085	Zak	C	TRUE	sinusoidal	1.55008	5.08763	FALSE	sinusoidal	1.44609	4.28071
ENSMUSG00000004552	Ctse	C	TRUE	sigmoid	1.78507	5.88	FALSE	null	1	NA
ENSMUSG00000005089	Slc1a2	C	TRUE	sinusoidal	1.59012	10.8686	FALSE	sinusoidal	1.42217	11.9894
ENSMUSG00000005413	Hmox1	C	TRUE	sigmoid	2.40453	18.135	FALSE	null	1	NA
ENSMUSG00000006457	Actn3	C	TRUE	sinusoidal	2.48335	13.8981	FALSE	null	1	NA
ENSMUSG00000006711	D130043K22Rik	C	TRUE	sinusoidal	1.60389	23.9161	FALSE	null	1	NA
ENSMUSG00000007646	Rad51c	C	TRUE	sinusoidal	1.53379	19.3508	FALSE	null	1	NA
ENSMUSG00000007872	Id3	C	TRUE	sinusoidal	1.5834	13.4653	FALSE	null	1	NA
ENSMUSG00000007950	Abhd8	C	TRUE	sigmoid	1.73282	16.025	FALSE	null	1	NA
ENSMUSG00000008035	Mid1ip1	C	TRUE	sigmoid	1.62342	19.445	FALSE	null	1	NA
ENSMUSG00000008206	Cers4	C	TRUE	sinusoidal	1.65591	7.35397	FALSE	null	1	NA
ENSMUSG00000008384	Sertad1	C	TRUE	sinusoidal	1.54701	15.4294	FALSE	sinusoidal	1.49127	11.544
ENSMUSG00000008435	Rdh13	C	TRUE	sinusoidal	1.58924	18.4411	FALSE	sigmoid	1.35381	14.64
ENSMUSG00000008734	Gprc5b	C	TRUE	sinusoidal	1.5603	13.659	FALSE	null	1	NA
ENSMUSG00000009013	Dynll1	C	TRUE	sinusoidal	1.52147	20.1478	FALSE	sinusoidal	1.45597	19.0656
ENSMUSG00000009293	Ube2g2	C	TRUE	sinusoidal	1.66136	18.8958	FALSE	null	1	NA
ENSMUSG00000010760	Phlda2	C	TRUE	sinusoidal	1.50246	14.0991	FALSE	null	1	NA
ENSMUSG00000010830	Kdelr3	C	TRUE	sinusoidal	1.64701	8.01411	FALSE	null	1	NA
ENSMUSG00000011008	Mcoln2	C	TRUE	sinusoidal	1.59908	12.5256	FALSE	null	1	NA
ENSMUSG00000012848	Rps5	C	TRUE	sinusoidal	1.50856	17.0988	FALSE	null	1	NA
ENSMUSG00000013415	Igf2bp1	C	TRUE	sinusoidal	1.65802	1.51075	FALSE	null	1	NA
ENSMUSG00000014245	Pigl	C	TRUE	sinusoidal	1.58129	23.892	FALSE	sinusoidal	1.36326	23.0749
ENSMUSG00000015127	Unkl	C	TRUE	sinusoidal	1.60577	18.591	FALSE	null	1	NA
ENSMUSG00000015134	Aldh1a3	C	TRUE	sinusoidal	1.85553	5.60388	FALSE	null	1	NA
ENSMUSG00000015484	Fam163a	C	TRUE	sigmoid	2.4837	19.4	FALSE	null	1	NA
ENSMUSG00000015533	Itga2	C	TRUE	sinusoidal	1.80966	9.85307	FALSE	null	1	NA
ENSMUSG00000015702	Anxa9	C	TRUE	sinusoidal	1.68347	3.66025	FALSE	null	1	NA
ENSMUSG00000015850	Adamtsl4	C	TRUE	sinusoidal	1.64413	18.6149	FALSE	sinusoidal	1.47126	17.7248
ENSMUSG00000015968	Cacna1d	C	TRUE	sigmoid	1.8328	15.105	FALSE	null	1	NA
ENSMUSG00000016427	Ndufa1	C	TRUE	sinusoidal	1.52301	15.4361	FALSE	sigmoid	1.23065	18.495
ENSMUSG00000016496	Cd274	C	TRUE	sinusoidal	1.76266	6.89189	FALSE	null	1	NA
ENSMUSG00000016552	Foxred2	C	TRUE	sinusoidal	1.50477	11.8789	FALSE	sinusoidal	1.35615	11.9301
ENSMUSG00000017390	Aldoc	C	TRUE	sigmoid	1.77173	15.825	FALSE	sinusoidal	1.35241	13.7549
ENSMUSG00000017817	Jph2	C	TRUE	sinusoidal	2.58132	3.99037	FALSE	null	1	NA
ENSMUSG00000018143	Mafk	C	TRUE	sigmoid	1.61042	3.665	FALSE	sinusoidal	1.48364	5.9278
ENSMUSG00000018819	Lsp1	C	TRUE	sinusoidal	1.64302	2.30478	FALSE	null	1	NA
ENSMUSG00000018846	Pank3	C	TRUE	sigmoid	1.6209	11.375	FALSE	null	1	NA
ENSMUSG00000018906	P4ha2	C	TRUE	sigmoid	1.52765	15.69	FALSE	sigmoid	1.46996	15.235
ENSMUSG00000019647	Sema6a	C	TRUE	sinusoidal	1.53539	23.7975	FALSE	sinusoidal	1.43949	23.4079
ENSMUSG00000019761	Krt10	C	TRUE	sigmoid	1.89911	4.185	FALSE	null	1	NA
ENSMUSG00000019768	Esr1	C	TRUE	sinusoidal	1.61959	14.4595	FALSE	null	1	NA
ENSMUSG00000019889	Ptprk	C	TRUE	sinusoidal	1.57905	1.38497	FALSE	sinusoidal	1.398	0.0822144
ENSMUSG00000019966	Kitl	C	TRUE	sigmoid	1.67539	16.07	FALSE	null	1	NA
ENSMUSG00000020155	Kcnmb1	C	TRUE	sigmoid	2.39311	4.065	FALSE	null	1	NA
ENSMUSG00000020169	Best3	C	TRUE	sinusoidal	2.01085	4.54106	FALSE	null	1	NA
ENSMUSG00000020262	Adarb1	C	TRUE	sinusoidal	1.55236	15.4669	FALSE	sigmoid	1.42479	13.965
ENSMUSG00000020277	Pfkl	C	TRUE	sigmoid	1.53028	15.965	FALSE	null	1	NA
ENSMUSG00000020372	Gnb2l1	C	TRUE	sinusoidal	1.6014	16.8915	FALSE	sigmoid	1.23657	18.13
ENSMUSG00000020407	Upp1	C	TRUE	sigmoid	1.66593	15.92	FALSE	null	1	NA
ENSMUSG00000020527	Myo19	C	TRUE	sigmoid	1.54923	11.405	FALSE	sinusoidal	1.37804	11.5348
ENSMUSG00000020593	Lpin1	C	TRUE	sinusoidal	1.53456	11.3733	FALSE	sigmoid	1.46526	13.545
ENSMUSG00000020620	Abca8b	C	TRUE	sinusoidal	1.56265	16.8773	FALSE	sinusoidal	1.46505	16.9073
ENSMUSG00000020669	Sh3yl1	C	TRUE	sinusoidal	1.53168	9.76272	FALSE	null	1	NA
ENSMUSG00000020707	Rnf135	C	TRUE	sinusoidal	1.61987	18.6983	FALSE	sinusoidal	1.34674	18.8823
ENSMUSG00000020728	Cep112	C	TRUE	sinusoidal	1.95403	10.0766	FALSE	null	1	NA
ENSMUSG00000020773	Trim47	C	TRUE	sinusoidal	1.54365	19.0925	FALSE	null	1	NA
ENSMUSG00000020823	Sec14l1	C	TRUE	sigmoid	1.49611	14.87	FALSE	sinusoidal	1.29993	18.6752
ENSMUSG00000020846	Fam101b	C	TRUE	sigmoid	1.67237	6.01	FALSE	null	1	NA
ENSMUSG00000020876	Snx11	C	TRUE	sigmoid	1.71586	15.385	FALSE	null	1	NA
ENSMUSG00000021134	Srsf5	C	TRUE	sinusoidal	1.73891	3.58009	FALSE	null	1	NA
ENSMUSG00000021210	Akr1c6	C	TRUE	sigmoid	2.49333	13.03	FALSE	null	1	NA
ENSMUSG00000021222	Dcaf4	C	TRUE	sinusoidal	1.49984	5.35759	FALSE	sinusoidal	1.4875	4.76864
ENSMUSG00000021228	Acot3	C	TRUE	sinusoidal	1.61959	15.5489	FALSE	null	1	NA
ENSMUSG00000021262	Evl	C	TRUE	sinusoidal	1.62238	2.48367	FALSE	null	1	NA
ENSMUSG00000021265	Slc25a29	C	TRUE	sigmoid	1.5832	16.045	FALSE	null	1	NA
ENSMUSG00000021281	Tnfaip2	C	TRUE	sinusoidal	1.64825	0.642872	FALSE	sinusoidal	1.38529	0.424889
ENSMUSG00000021319	Sfrp4	C	TRUE	sinusoidal	3.2785	3.70156	FALSE	null	1	NA
ENSMUSG00000021431	Snrnp48	C	TRUE	sinusoidal	1.50832	20.2373	FALSE	null	1	NA
ENSMUSG00000021453	Gadd45g	C	TRUE	sinusoidal	1.70582	18.3807	FALSE	null	1	NA
ENSMUSG00000021500	Ddx46	C	TRUE	sinusoidal	1.52446	6.51388	FALSE	sinusoidal	1.41719	7.11987
ENSMUSG00000021594	Srd5a1	C	TRUE	sinusoidal	1.53338	8.96966	FALSE	sinusoidal	1.40482	8.79628
ENSMUSG00000021613	Hapln1	C	TRUE	sinusoidal	1.81515	18.9207	FALSE	null	1	NA
ENSMUSG00000021643	Serf1	C	TRUE	sinusoidal	1.83674	3.87723	FALSE	null	1	NA
ENSMUSG00000021701	Plk2	C	TRUE	sinusoidal	1.82408	5.25146	FALSE	sinusoidal	1.40864	4.25685
ENSMUSG00000021822	Plau	C	TRUE	sinusoidal	1.64964	3.90103	FALSE	sinusoidal	1.39611	3.20121
ENSMUSG00000021843	Ktn1	C	TRUE	sinusoidal	1.67691	8.17627	FALSE	null	1	NA
ENSMUSG00000021943	Gdf10	C	TRUE	sigmoid	1.50109	15.955	FALSE	null	1	NA
ENSMUSG00000022014	Epsti1	C	TRUE	sinusoidal	1.88201	3.25913	FALSE	null	1	NA
ENSMUSG00000022092	Ppp3cc	C	TRUE	sinusoidal	1.50168	8.91944	FALSE	null	1	NA
ENSMUSG00000022122	Ednrb	C	TRUE	sinusoidal	1.52009	10.0465	FALSE	sinusoidal	1.34499	11.4936
ENSMUSG00000022181	C6	C	TRUE	sigmoid	2.16637	15.49	FALSE	null	1	NA
ENSMUSG00000022220	Adcy4	C	TRUE	sinusoidal	1.50452	19.5585	FALSE	sigmoid	1.35882	16.19
ENSMUSG00000022221	Ripk3	C	TRUE	sinusoidal	1.87687	6.86245	FALSE	null	1	NA
ENSMUSG00000022330	Osr2	C	TRUE	sinusoidal	1.64054	3.82713	FALSE	null	1	NA
ENSMUSG00000022335	Zfat	C	TRUE	sinusoidal	1.55123	21.6285	FALSE	sinusoidal	1.48423	19.5321
ENSMUSG00000022346	Myc	C	TRUE	sinusoidal	1.81647	22.4531	FALSE	null	1	NA
ENSMUSG00000022383	Ppara	C	TRUE	sinusoidal	1.57156	12.759	FALSE	sinusoidal	1.42328	12.7612
ENSMUSG00000022464	Slc38a4	C	TRUE	sinusoidal	1.70715	14.6057	FALSE	null	1	NA
ENSMUSG00000022537	Tmem44	C	TRUE	sinusoidal	2.37425	4.76882	FALSE	null	1	NA
ENSMUSG00000022833	Ccdc14	C	TRUE	sigmoid	1.80616	4.26	FALSE	null	1	NA
ENSMUSG00000022878	Adipoq	C	TRUE	sinusoidal	7.81784	4.46119	FALSE	null	1	NA
ENSMUSG00000022960	Donson	C	TRUE	sinusoidal	1.67912	7.3007	FALSE	null	1	NA
ENSMUSG00000023032	Slc4a8	C	TRUE	sigmoid	1.65831	15.72	FALSE	null	1	NA
ENSMUSG00000023039	Krt7	C	TRUE	sigmoid	1.67998	15.365	FALSE	sigmoid	1.39264	15.225
ENSMUSG00000023120	Gm853	C	TRUE	sinusoidal	1.51782	3.49889	FALSE	sinusoidal	1.48696	3.45654
ENSMUSG00000023243	Kcnk5	C	TRUE	sinusoidal	1.5709	17.1659	FALSE	null	1	NA
ENSMUSG00000023259	Slc26a6	C	TRUE	sinusoidal	1.70787	7.96505	FALSE	sinusoidal	1.37144	7.46385
ENSMUSG00000023944	Hsp90ab1	C	TRUE	sinusoidal	1.70358	20.0847	FALSE	sinusoidal	1.44171	20.4286
ENSMUSG00000024011	Pi16	C	TRUE	sinusoidal	1.87854	3.7413	FALSE	null	1	NA
ENSMUSG00000024053	Emilin2	C	TRUE	sinusoidal	1.60667	6.03838	FALSE	null	1	NA
ENSMUSG00000024160	Spsb3	C	TRUE	sinusoidal	1.68282	22.546	FALSE	sinusoidal	1.33443	22.4447
ENSMUSG00000024163	Mapk8ip3	C	TRUE	sinusoidal	1.56503	6.02922	FALSE	sinusoidal	1.42487	6.59027
ENSMUSG00000024238	Zeb1	C	TRUE	sinusoidal	1.54461	4.93847	FALSE	null	1	NA
ENSMUSG00000024521	Pmaip1	C	TRUE	sigmoid	1.76279	14.65	FALSE	null	1	NA
ENSMUSG00000024640	Psat1	C	TRUE	sigmoid	1.56747	15.82	FALSE	null	1	NA
ENSMUSG00000024818	Slc25a45	C	TRUE	sinusoidal	1.60632	21.3735	FALSE	sinusoidal	1.41519	18.3896
ENSMUSG00000024883	Rin1	C	TRUE	sigmoid	2.06757	3.09	FALSE	null	1	NA
ENSMUSG00000024891	Slc29a2	C	TRUE	sinusoidal	1.51253	15.6185	FALSE	sigmoid	1.40898	14.97
ENSMUSG00000025001	Hells	C	TRUE	sigmoid	1.9532	23.88	FALSE	null	1	NA
ENSMUSG00000025007	Aldh18a1	C	TRUE	sigmoid	1.59956	3.73	FALSE	null	1	NA
ENSMUSG00000025153	Fasn	C	TRUE	sinusoidal	1.50771	0.0792208	FALSE	sinusoidal	1.41258	1.48651
ENSMUSG00000025470	Zfp511	C	TRUE	sinusoidal	1.5315	1.7384	FALSE	null	1	NA
ENSMUSG00000025557	Slc15a1	C	TRUE	sinusoidal	1.56583	8.11318	FALSE	null	1	NA
ENSMUSG00000025586	Cpeb1	C	TRUE	sinusoidal	1.54128	13.0249	FALSE	null	1	NA
ENSMUSG00000025723	Nmb	C	TRUE	sinusoidal	1.81	13.6548	FALSE	null	1	NA
ENSMUSG00000025784	Clec3b	C	TRUE	sinusoidal	1.76367	4.16046	FALSE	null	1	NA
ENSMUSG00000025816	Sec61a2	C	TRUE	sinusoidal	1.54788	19.3303	FALSE	null	1	NA
ENSMUSG00000025887	Casp12	C	TRUE	sinusoidal	1.6223	5.5697	FALSE	null	1	NA
ENSMUSG00000025967	Eef1b2	C	TRUE	sinusoidal	1.68361	16.1254	FALSE	sigmoid	1.19462	18.605
ENSMUSG00000026065	Slc9a4	C	TRUE	sinusoidal	1.60038	22.0619	FALSE	null	1	NA
ENSMUSG00000026082	Rev1	C	TRUE	sinusoidal	1.63412	13.702	FALSE	sinusoidal	1.30126	14.5037
ENSMUSG00000026188	Tmem169	C	TRUE	sinusoidal	1.59157	1.85253	FALSE	null	1	NA
ENSMUSG00000026394	Atp6v1g3	C	TRUE	sinusoidal	1.61706	0.287043	FALSE	sinusoidal	1.21726	0.765466
ENSMUSG00000026435	Slc45a3	C	TRUE	sigmoid	1.63064	14.99	FALSE	sigmoid	1.48957	14.37
ENSMUSG00000026525	Opn3	C	TRUE	sigmoid	3.15397	6.02	FALSE	null	1	NA
ENSMUSG00000026630	Batf3	C	TRUE	sinusoidal	3.62966	22.6896	FALSE	null	1	NA
ENSMUSG00000026723	Trdmt1	C	TRUE	sinusoidal	1.56046	7.53356	FALSE	null	1	NA
ENSMUSG00000026921	Egfl7	C	TRUE	sinusoidal	1.79046	5.27761	FALSE	sinusoidal	1.3404	6.28652
ENSMUSG00000026977	March7	C	TRUE	sinusoidal	1.50882	6.93796	FALSE	null	1	NA
ENSMUSG00000027306	Nusap1	C	TRUE	sinusoidal	1.68036	9.78106	FALSE	null	1	NA
ENSMUSG00000027329	Spef1	C	TRUE	sinusoidal	2.45484	6.07726	FALSE	null	1	NA
ENSMUSG00000027375	Mal	C	TRUE	sigmoid	1.57316	15.64	FALSE	sinusoidal	1.35249	16.9022
ENSMUSG00000027408	Cpxm1	C	TRUE	sinusoidal	1.50182	21.8542	FALSE	sinusoidal	1.44639	22.4695
ENSMUSG00000027551	Zfp64	C	TRUE	sigmoid	1.54504	7.775	FALSE	null	1	NA
ENSMUSG00000027577	Chrna4	C	TRUE	sinusoidal	1.55046	20.3068	FALSE	null	1	NA
ENSMUSG00000027660	Skil	C	TRUE	sinusoidal	1.50984	17.4897	FALSE	sinusoidal	1.4207	18.1896
ENSMUSG00000027765	P2ry1	C	TRUE	sinusoidal	1.61389	14.5915	FALSE	null	1	NA
ENSMUSG00000027801	Tm4sf4	C	TRUE	sinusoidal	1.51234	3.4928	FALSE	null	1	NA
ENSMUSG00000027887	Sypl2	C	TRUE	sinusoidal	1.87301	16.5865	FALSE	sigmoid	1.39132	17.735
ENSMUSG00000027935	Rab13	C	TRUE	sinusoidal	1.58701	3.87148	FALSE	sinusoidal	1.36085	5.847
ENSMUSG00000027952	Pmvk	C	TRUE	sinusoidal	1.50778	18.4636	FALSE	null	1	NA
ENSMUSG00000028023	Pitx2	C	TRUE	sigmoid	2.21524	20.13	FALSE	null	1	NA
ENSMUSG00000028031	Dkk2	C	TRUE	sinusoidal	1.59911	4.4258	FALSE	sinusoidal	1.42478	3.49439
ENSMUSG00000028036	Ptgfr	C	TRUE	sinusoidal	1.53683	15.0742	FALSE	sinusoidal	1.41204	15.4422
ENSMUSG00000028081	Rps3a1	C	TRUE	sinusoidal	1.60552	15.7275	FALSE	sigmoid	1.34381	18.505
ENSMUSG00000028093	Acp6	C	TRUE	sigmoid	1.60817	10.56	FALSE	sigmoid	1.34594	11.155
ENSMUSG00000028100	Nudt17	C	TRUE	sinusoidal	1.89128	5.44584	FALSE	null	1	NA
ENSMUSG00000028133	Rwdd3	C	TRUE	sinusoidal	1.87963	5.45054	FALSE	null	1	NA
ENSMUSG00000028211	Trp53inp1	C	TRUE	sinusoidal	1.52343	2.5298	FALSE	null	1	NA
ENSMUSG00000028214	Gem	C	TRUE	sigmoid	1.81382	15.44	FALSE	null	1	NA
ENSMUSG00000028329	Xpa	C	TRUE	sinusoidal	1.56496	6.3727	FALSE	sinusoidal	1.40329	5.82897
ENSMUSG00000028391	Wdr31	C	TRUE	sinusoidal	1.7127	8.06467	FALSE	sinusoidal	1.44263	6.04875
ENSMUSG00000028457	Atp8b5	C	TRUE	sinusoidal	3.09406	4.17703	FALSE	null	1	NA
ENSMUSG00000028483	Snapc3	C	TRUE	sinusoidal	1.6217	16.8465	FALSE	null	1	NA
ENSMUSG00000028653	Trit1	C	TRUE	sinusoidal	1.61947	8.60208	FALSE	sinusoidal	1.25319	6.91903
ENSMUSG00000028670	Lypla2	C	TRUE	sinusoidal	1.54489	5.95507	FALSE	sinusoidal	1.37573	6.83301
ENSMUSG00000028701	Lurap1	C	TRUE	sigmoid	1.72016	15.51	FALSE	null	1	NA
ENSMUSG00000028773	Fabp3	C	TRUE	sinusoidal	1.74144	12.5665	FALSE	sinusoidal	1.4193	12.6711
ENSMUSG00000028820	Sfpq	C	TRUE	sigmoid	1.70231	13.8	FALSE	sigmoid	1.44077	14.535
ENSMUSG00000028878	Fam76a	C	TRUE	sinusoidal	1.52657	11.7017	FALSE	sigmoid	1.3539	10.725
ENSMUSG00000028931	Kcnab2	C	TRUE	sinusoidal	1.86127	1.85978	FALSE	null	1	NA
ENSMUSG00000028982	Slc25a33	C	TRUE	sinusoidal	1.98777	12.6107	FALSE	sinusoidal	1.29925	11.1628
ENSMUSG00000029009	Mthfr	C	TRUE	sinusoidal	1.67451	20.6432	FALSE	sinusoidal	1.48038	22.3568
ENSMUSG00000029095	Ablim2	C	TRUE	sinusoidal	1.84607	10.4021	FALSE	null	1	NA
ENSMUSG00000029097	Trmt44	C	TRUE	sinusoidal	2.06528	18.3333	FALSE	null	1	NA
ENSMUSG00000029123	Stk32b	C	TRUE	sinusoidal	1.87572	14.2782	FALSE	sinusoidal	1.40054	11.1332
ENSMUSG00000029177	Cenpa	C	TRUE	sinusoidal	5.31479	7.50911	FALSE	null	1	NA
ENSMUSG00000029185	Fam114a1	C	TRUE	sinusoidal	1.61266	5.4114	FALSE	null	1	NA
ENSMUSG00000029368	Alb	C	TRUE	sigmoid	2.4421	12.89	FALSE	null	1	NA
ENSMUSG00000029392	Rilpl1	C	TRUE	sigmoid	1.60114	15.67	FALSE	sinusoidal	1.28111	10.0577
ENSMUSG00000029416	Slc15a4	C	TRUE	sinusoidal	1.53014	18.7332	FALSE	sinusoidal	1.27024	18.9114
ENSMUSG00000029467	Atp2a2	C	TRUE	sigmoid	1.53341	15.93	FALSE	null	1	NA
ENSMUSG00000029482	Aacs	C	TRUE	sinusoidal	1.4951	15.9337	FALSE	null	1	NA
ENSMUSG00000029608	Rph3a	C	TRUE	sinusoidal	2.23453	15.4019	FALSE	null	1	NA
ENSMUSG00000029716	Tfr2	C	TRUE	sigmoid	1.95964	12.59	FALSE	null	1	NA
ENSMUSG00000029727	Cyp3a13	C	TRUE	sinusoidal	2.62534	15.1448	FALSE	null	1	NA
ENSMUSG00000029762	Akr1b8	C	TRUE	sinusoidal	1.58248	6.77374	FALSE	null	1	NA
ENSMUSG00000029778	Adcyap1r1	C	TRUE	sinusoidal	1.7535	8.048	FALSE	null	1	NA
ENSMUSG00000029838	Ptn	C	TRUE	sinusoidal	1.83272	5.00814	FALSE	null	1	NA
ENSMUSG00000030122	Ptms	C	TRUE	sinusoidal	1.58973	2.57534	FALSE	null	1	NA
ENSMUSG00000030137	Tuba8	C	TRUE	sigmoid	2.73462	16.18	FALSE	null	1	NA
ENSMUSG00000030217	Art4	C	TRUE	sinusoidal	1.50903	12.9779	FALSE	sinusoidal	1.3462	15.1083
ENSMUSG00000030254	Rad18	C	TRUE	sinusoidal	1.72883	9.4147	FALSE	null	1	NA
ENSMUSG00000030268	Bcat1	C	TRUE	sinusoidal	2.04746	8.96482	FALSE	null	1	NA
ENSMUSG00000030269	Mtmr14	C	TRUE	sinusoidal	1.56346	7.77284	FALSE	sinusoidal	1.28349	8.7337
ENSMUSG00000030316	Tamm41	C	TRUE	sinusoidal	1.59621	12.3545	FALSE	sinusoidal	1.32813	11.2879
ENSMUSG00000030492	Slc7a9	C	TRUE	sinusoidal	1.59257	13.0123	FALSE	sinusoidal	1.35977	11.7262
ENSMUSG00000030641	4632434I11Rik	C	TRUE	sinusoidal	6.0759	4.59372	FALSE	null	1	NA
ENSMUSG00000030671	Pde3b	C	TRUE	sigmoid	1.54843	15.765	FALSE	sinusoidal	1.33015	19.0238
ENSMUSG00000030768	Disp1	C	TRUE	sinusoidal	1.51076	2.83592	FALSE	sinusoidal	1.32903	3.52523
ENSMUSG00000030814	Bcl7c	C	TRUE	sinusoidal	1.58439	0.950229	FALSE	sinusoidal	1.32955	1.21271
ENSMUSG00000030842	Lamtor1	C	TRUE	sinusoidal	1.55007	2.14523	FALSE	null	1	NA
ENSMUSG00000030844	Rgs10	C	TRUE	sigmoid	1.61718	15.53	FALSE	sinusoidal	1.39747	19.0561
ENSMUSG00000030954	Gp2	C	TRUE	sinusoidal	1.76705	14.7659	FALSE	null	1	NA
ENSMUSG00000031090	Nadsyn1	C	TRUE	sinusoidal	1.53358	11.4423	FALSE	sigmoid	1.42974	13.66
ENSMUSG00000031298	Gpr64	C	TRUE	sinusoidal	1.74152	21.3733	FALSE	null	1	NA
ENSMUSG00000031320	Rps4x	C	TRUE	sinusoidal	1.58089	16.6222	FALSE	sigmoid	1.29043	18.04
ENSMUSG00000031390	Avpr2	C	TRUE	sinusoidal	1.68762	20.1806	FALSE	null	1	NA
ENSMUSG00000031661	Nkd1	C	TRUE	sinusoidal	2.2343	3.28124	FALSE	null	1	NA
ENSMUSG00000031776	Arl2bp	C	TRUE	sinusoidal	2.22581	5.10849	FALSE	null	1	NA
ENSMUSG00000031832	Taf1c	C	TRUE	sinusoidal	1.64596	17.9697	FALSE	null	1	NA
ENSMUSG00000031844	Hsd17b2	C	TRUE	sinusoidal	1.712	4.36753	FALSE	sinusoidal	1.49115	3.24904
ENSMUSG00000032103	Pus3	C	TRUE	sinusoidal	1.50636	18.7324	FALSE	sinusoidal	1.40009	20.1552
ENSMUSG00000032285	Dnaja4	C	TRUE	sinusoidal	1.57793	18.2271	FALSE	null	1	NA
ENSMUSG00000032300	1700017B05Rik	C	TRUE	sinusoidal	1.58543	20.5605	FALSE	null	1	NA
ENSMUSG00000032333	Stoml1	C	TRUE	sinusoidal	1.5434	6.7663	FALSE	sinusoidal	1.47515	7.71287
ENSMUSG00000032491	Nradd	C	TRUE	sinusoidal	1.69555	12.0066	FALSE	null	1	NA
ENSMUSG00000032525	Nktr	C	TRUE	sinusoidal	1.66648	18.1303	FALSE	null	1	NA
ENSMUSG00000032532	Cck	C	TRUE	sigmoid	1.51047	16.965	FALSE	null	1	NA
ENSMUSG00000032551	1110059G10Rik	C	TRUE	sinusoidal	1.54208	4.08442	FALSE	null	1	NA
ENSMUSG00000032579	Hemk1	C	TRUE	sinusoidal	1.4958	10.4752	FALSE	sinusoidal	1.40752	10.6176
ENSMUSG00000032580	Rbm5	C	TRUE	sinusoidal	1.54141	18.0967	FALSE	sinusoidal	1.35302	18.2407
ENSMUSG00000032641	Gpr19	C	TRUE	sinusoidal	1.91967	5.7917	FALSE	null	1	NA
ENSMUSG00000032788	Pdxk	C	TRUE	sinusoidal	1.67922	14.6533	FALSE	sinusoidal	1.40364	13.394
ENSMUSG00000033032	Afap1l1	C	TRUE	sinusoidal	1.52309	4.61793	FALSE	null	1	NA
ENSMUSG00000033287	Kctd17	C	TRUE	sinusoidal	1.52192	2.16132	FALSE	sinusoidal	1.25087	4.88325
ENSMUSG00000033356	Pus7l	C	TRUE	sinusoidal	1.6141	18.6508	FALSE	sinusoidal	1.42146	20.1088
ENSMUSG00000033538	Casp4	C	TRUE	sigmoid	2.52621	3.755	FALSE	null	1	NA
ENSMUSG00000033544	Angptl1	C	TRUE	sigmoid	1.98756	10.245	FALSE	null	1	NA
ENSMUSG00000033632	AW554918	C	TRUE	sinusoidal	1.54149	7.76974	FALSE	null	1	NA
ENSMUSG00000033770	Clcnka	C	TRUE	sigmoid	1.66537	15.705	FALSE	null	1	NA
ENSMUSG00000033953	Ppp3r1	C	TRUE	sinusoidal	1.56024	15.728	FALSE	null	1	NA
ENSMUSG00000034006	Pqlc1	C	TRUE	sigmoid	1.52548	16.16	FALSE	null	1	NA
ENSMUSG00000034041	Lyl1	C	TRUE	sinusoidal	1.97076	8.15761	FALSE	null	1	NA
ENSMUSG00000034226	Rhov	C	TRUE	sinusoidal	1.76453	1.23712	FALSE	null	1	NA
ENSMUSG00000034329	Brip1	C	TRUE	sinusoidal	1.65254	9.69041	FALSE	null	1	NA
ENSMUSG00000034401	Spata6	C	TRUE	sinusoidal	1.56523	8.7524	FALSE	null	1	NA
ENSMUSG00000034472	Rasd2	C	TRUE	sinusoidal	1.94696	8.62515	FALSE	null	1	NA
ENSMUSG00000034614	Pik3ip1	C	TRUE	sinusoidal	1.62674	6.84347	FALSE	null	1	NA
ENSMUSG00000034739	Mfrp	C	TRUE	sigmoid	2.76637	15.585	FALSE	null	1	NA
ENSMUSG00000034762	Glis1	C	TRUE	sinusoidal	1.56969	5.06944	FALSE	null	1	NA
ENSMUSG00000034789	Rab24	C	TRUE	sinusoidal	1.54515	4.48779	FALSE	sinusoidal	1.32692	6.52009
ENSMUSG00000034810	Scn7a	C	TRUE	sinusoidal	1.55437	10.1564	FALSE	null	1	NA
ENSMUSG00000034994	Eef2	C	TRUE	sinusoidal	1.73086	17.1668	FALSE	sinusoidal	1.15769	8.76088
ENSMUSG00000035762	Tmem161b	C	TRUE	sinusoidal	1.55119	8.73395	FALSE	null	1	NA
ENSMUSG00000036091	Hyal3	C	TRUE	sigmoid	1.96946	14.665	FALSE	null	1	NA
ENSMUSG00000036106	Prr5	C	TRUE	sinusoidal	1.86191	21.0607	FALSE	null	1	NA
ENSMUSG00000036555	Iqce	C	TRUE	sinusoidal	1.59407	5.76414	FALSE	sinusoidal	1.45774	6.06333
ENSMUSG00000036564	Ndrg4	C	TRUE	sinusoidal	1.82158	7.96007	FALSE	null	1	NA
ENSMUSG00000036775	Decr2	C	TRUE	sinusoidal	1.63013	12.4786	FALSE	sinusoidal	1.35028	12.8826
ENSMUSG00000036819	Jmjd4	C	TRUE	sinusoidal	1.51266	17.1418	FALSE	sigmoid	1.40873	14.935
ENSMUSG00000036854	Hspb6	C	TRUE	sigmoid	1.94639	16.155	FALSE	null	1	NA
ENSMUSG00000036890	Gtdc1	C	TRUE	sinusoidal	1.68968	9.47753	FALSE	null	1	NA
ENSMUSG00000037010	Apln	C	TRUE	sinusoidal	2.19943	7.18278	FALSE	null	1	NA
ENSMUSG00000037169	Mycn	C	TRUE	sinusoidal	1.8052	0.360414	FALSE	null	1	NA
ENSMUSG00000037583	Nr0b2	C	TRUE	sigmoid	1.80616	15.785	FALSE	null	1	NA
ENSMUSG00000037661	Gpr160	C	TRUE	sinusoidal	1.59759	15.7958	FALSE	sinusoidal	1.29763	16.193
ENSMUSG00000037742	Eef1a1	C	TRUE	sinusoidal	1.82712	16.9481	FALSE	null	1	NA
ENSMUSG00000037762	Slc16a9	C	TRUE	sinusoidal	1.53041	15.3459	FALSE	sinusoidal	1.42745	16.2065
ENSMUSG00000037808	Fam76b	C	TRUE	sigmoid	1.61612	10.355	FALSE	null	1	NA
ENSMUSG00000037904	Ankrd9	C	TRUE	sinusoidal	1.65834	16.9483	FALSE	null	1	NA
ENSMUSG00000038059	Smim3	C	TRUE	sinusoidal	3.85483	2.05096	FALSE	null	1	NA
ENSMUSG00000038070	Cntln	C	TRUE	sinusoidal	1.5729	8.77067	FALSE	null	1	NA
ENSMUSG00000038145	Snrk	C	TRUE	sinusoidal	1.55557	12.8024	FALSE	sigmoid	1.36832	13.23
ENSMUSG00000038264	Sema7a	C	TRUE	sigmoid	1.55443	15.8	FALSE	sinusoidal	1.42433	11.7184
ENSMUSG00000038481	Cdk19	C	TRUE	sinusoidal	1.53763	4.88028	FALSE	null	1	NA
ENSMUSG00000038570	Fam154b	C	TRUE	sinusoidal	2.17322	3.60119	FALSE	null	1	NA
ENSMUSG00000038578	Susd1	C	TRUE	sinusoidal	1.89254	13.3337	FALSE	sinusoidal	1.47872	15.2073
ENSMUSG00000038742	Angptl6	C	TRUE	sigmoid	1.74372	20.62	FALSE	null	1	NA
ENSMUSG00000038782	1700028J19Rik	C	TRUE	sinusoidal	1.59074	14.9322	FALSE	null	1	NA
ENSMUSG00000039001	Rps21	C	TRUE	sinusoidal	1.66992	17.6067	FALSE	null	1	NA
ENSMUSG00000039092	Sptlc3	C	TRUE	sigmoid	1.88613	12.11	FALSE	null	1	NA
ENSMUSG00000039154	Shd	C	TRUE	sinusoidal	1.66523	10.6487	FALSE	sinusoidal	1.48832	9.88093
ENSMUSG00000039166	Akap7	C	TRUE	sinusoidal	1.72314	10.5037	FALSE	null	1	NA
ENSMUSG00000039232	Stx11	C	TRUE	sinusoidal	3.35078	2.45574	FALSE	null	1	NA
ENSMUSG00000039242	B3galnt2	C	TRUE	sinusoidal	1.99159	17.7612	FALSE	sinusoidal	1.35061	18.8457
ENSMUSG00000039298	Cdk5rap2	C	TRUE	sinusoidal	1.57648	5.69417	FALSE	sinusoidal	1.28598	6.39536
ENSMUSG00000039607	Rbms3	C	TRUE	sinusoidal	1.59485	5.69165	FALSE	null	1	NA
ENSMUSG00000039629	Strip2	C	TRUE	sinusoidal	1.56569	0.66661	FALSE	sinusoidal	1.35766	21.7202
ENSMUSG00000039648	Ccbl1	C	TRUE	sinusoidal	1.548	9.01808	FALSE	sinusoidal	1.44345	10.4566
ENSMUSG00000039653	Baat	C	TRUE	sinusoidal	1.72327	15.6087	FALSE	null	1	NA
ENSMUSG00000039680	Mrps6	C	TRUE	sigmoid	1.64298	15.72	FALSE	null	1	NA
ENSMUSG00000039738	Slx4	C	TRUE	sinusoidal	1.58414	19.2879	FALSE	sinusoidal	1.33357	18.9049
ENSMUSG00000039826	Trub2	C	TRUE	sinusoidal	1.59532	9.97347	FALSE	sinusoidal	1.43236	8.00199
ENSMUSG00000039883	Lrrc17	C	TRUE	sigmoid	2.52921	1.62	FALSE	null	1	NA
ENSMUSG00000039934	Gsap	C	TRUE	sinusoidal	1.52221	10.7108	FALSE	sigmoid	1.42095	12.265
ENSMUSG00000039942	Ptger4	C	TRUE	sigmoid	1.64369	16.075	FALSE	null	1	NA
ENSMUSG00000040016	Ptger3	C	TRUE	sinusoidal	2.07201	17.9683	FALSE	null	1	NA
ENSMUSG00000040219	Ttc12	C	TRUE	sinusoidal	1.58577	8.01306	FALSE	sinusoidal	1.37577	7.90398
ENSMUSG00000040586	Ofd1	C	TRUE	sinusoidal	1.51801	6.18737	FALSE	null	1	NA
ENSMUSG00000040640	Erc2	C	TRUE	sinusoidal	1.72748	1.85169	FALSE	sinusoidal	1.34973	1.43308
ENSMUSG00000040699	Limd2	C	TRUE	sinusoidal	1.71251	6.20954	FALSE	sigmoid	1.47439	7.33
ENSMUSG00000040711	Sh3pxd2b	C	TRUE	sinusoidal	1.71968	2.622	FALSE	null	1	NA
ENSMUSG00000041144	Dnah7b	C	TRUE	sigmoid	1.61114	12.14	FALSE	sinusoidal	1.23995	6.85798
ENSMUSG00000041147	Brca2	C	TRUE	sigmoid	1.85798	10.435	FALSE	null	1	NA
ENSMUSG00000041272	Tox	C	TRUE	sinusoidal	2.07558	6.67961	FALSE	null	1	NA
ENSMUSG00000041481	Serpina3g	C	TRUE	sinusoidal	2.58984	6.7005	FALSE	null	1	NA
ENSMUSG00000041523	Upk2	C	TRUE	sigmoid	1.77717	8.815	FALSE	null	1	NA
ENSMUSG00000041629	Fam104a	C	TRUE	sinusoidal	1.54554	3.26706	FALSE	null	1	NA
ENSMUSG00000041840	Haus1	C	TRUE	sinusoidal	1.65939	8.78242	FALSE	null	1	NA
ENSMUSG00000041995	Zbed3	C	TRUE	sinusoidal	1.63866	18.7982	FALSE	null	1	NA
ENSMUSG00000042349	Ikbke	C	TRUE	sinusoidal	1.83506	8.11312	FALSE	null	1	NA
ENSMUSG00000042429	Adora1	C	TRUE	sinusoidal	3.07554	4.10476	FALSE	null	1	NA
ENSMUSG00000042439	Zfp532	C	TRUE	sinusoidal	1.50292	5.14832	FALSE	null	1	NA
ENSMUSG00000042659	Arrdc4	C	TRUE	sinusoidal	1.70883	5.66837	FALSE	sinusoidal	1.45266	5.57903
ENSMUSG00000042686	Jph1	C	TRUE	sinusoidal	2.55545	7.64739	FALSE	null	1	NA
ENSMUSG00000042759	Apobr	C	TRUE	sinusoidal	2.03279	5.62926	FALSE	null	1	NA
ENSMUSG00000042901	Aida	C	TRUE	sinusoidal	1.62667	3.00205	FALSE	null	1	NA
ENSMUSG00000043065	Spice1	C	TRUE	sinusoidal	1.58617	3.27413	FALSE	sinusoidal	1.43723	2.32396
ENSMUSG00000043079	Synpo	C	TRUE	sinusoidal	1.49831	4.97609	FALSE	sinusoidal	1.47898	6.55975
ENSMUSG00000044043	Pcdhb14	C	TRUE	sinusoidal	1.5736	8.12038	FALSE	null	1	NA
ENSMUSG00000044258	Ctla2a	C	TRUE	sinusoidal	1.69836	8.80247	FALSE	null	1	NA
ENSMUSG00000044749	Abca6	C	TRUE	sinusoidal	2.16441	10.745	FALSE	null	1	NA
ENSMUSG00000044881	Coa4	C	TRUE	sigmoid	1.8436	4.05	FALSE	null	1	NA
ENSMUSG00000044952	Kctd21	C	TRUE	sinusoidal	1.56953	22.4346	FALSE	null	1	NA
ENSMUSG00000045328	Cenpe	C	TRUE	sinusoidal	1.71341	6.44418	FALSE	null	1	NA
ENSMUSG00000045534	Kcna5	C	TRUE	sinusoidal	2.79577	17.1012	FALSE	null	1	NA
ENSMUSG00000045875	Adra1a	C	TRUE	sinusoidal	1.58908	17.5994	FALSE	null	1	NA
ENSMUSG00000046080	Clec9a	C	TRUE	sinusoidal	2.51235	3.51358	FALSE	null	1	NA
ENSMUSG00000046169	Adamts6	C	TRUE	sinusoidal	2.06231	10.3558	FALSE	null	1	NA
ENSMUSG00000046186	Cd109	C	TRUE	sinusoidal	1.67688	10.1392	FALSE	null	1	NA
ENSMUSG00000046245	Pilra	C	TRUE	sinusoidal	2.22911	4.81104	FALSE	null	1	NA
ENSMUSG00000046318	Ccbe1	C	TRUE	sinusoidal	1.704	15.4068	FALSE	null	1	NA
ENSMUSG00000046352	Gjb2	C	TRUE	sigmoid	1.77277	6.07	FALSE	sinusoidal	1.49338	9.07863
ENSMUSG00000046442	Ppm1e	C	TRUE	sinusoidal	1.5317	23.335	FALSE	sinusoidal	1.3581	2.21539
ENSMUSG00000046719	Nxph3	C	TRUE	sinusoidal	2.40551	4.45549	FALSE	null	1	NA
ENSMUSG00000046768	Rhoj	C	TRUE	sigmoid	1.77533	6.925	FALSE	sinusoidal	1.32719	3.31403
ENSMUSG00000046807	Fam211b	C	TRUE	sinusoidal	1.93508	8.36979	FALSE	null	1	NA
ENSMUSG00000047557	Lxn	C	TRUE	sinusoidal	1.66965	8.69321	FALSE	null	1	NA
ENSMUSG00000047586	Nccrp1	C	TRUE	sigmoid	2.22522	15.97	FALSE	null	1	NA
ENSMUSG00000047638	Nr1h4	C	TRUE	sinusoidal	1.55538	9.64066	FALSE	null	1	NA
ENSMUSG00000047656	Trpt1	C	TRUE	sinusoidal	1.52255	10.0048	FALSE	null	1	NA
ENSMUSG00000048495	Tyw5	C	TRUE	sinusoidal	1.60562	4.40096	FALSE	null	1	NA
ENSMUSG00000048772	Tmem53	C	TRUE	sinusoidal	1.51291	0.500561	FALSE	sinusoidal	1.27073	0.032494
ENSMUSG00000048960	Prex2	C	TRUE	sigmoid	1.57565	12.24	FALSE	sinusoidal	1.4403	15.8793
ENSMUSG00000049038	Mterfd3	C	TRUE	sinusoidal	1.78921	6.36831	FALSE	null	1	NA
ENSMUSG00000049184	Purg	C	TRUE	sigmoid	2.5233	15.905	FALSE	null	1	NA
ENSMUSG00000049436	Upk1b	C	TRUE	sinusoidal	1.73681	7.28431	FALSE	null	1	NA
ENSMUSG00000049536	Tceal1	C	TRUE	sinusoidal	1.63968	3.19375	FALSE	null	1	NA
ENSMUSG00000049882	Mettl21d	C	TRUE	sinusoidal	1.63907	3.58575	FALSE	null	1	NA
ENSMUSG00000050069	Grem2	C	TRUE	sigmoid	2.74134	15.535	FALSE	null	1	NA
ENSMUSG00000050359	Sprr1a	C	TRUE	sinusoidal	1.98072	4.55282	FALSE	null	1	NA
ENSMUSG00000050628	Ubald2	C	TRUE	sigmoid	1.53742	3.835	FALSE	null	1	NA
ENSMUSG00000050666	Vstm4	C	TRUE	sinusoidal	1.59955	4.39874	FALSE	sinusoidal	1.32289	4.49474
ENSMUSG00000051041	Olfml1	C	TRUE	sinusoidal	1.54127	7.16553	FALSE	null	1	NA
ENSMUSG00000051390	Zbtb22	C	TRUE	sinusoidal	1.49795	4.60896	FALSE	sinusoidal	1.27287	8.42302
ENSMUSG00000052131	Akr1b7	C	TRUE	sinusoidal	1.77486	6.10874	FALSE	null	1	NA
ENSMUSG00000052146	Rps10	C	TRUE	sinusoidal	1.5406	16.4805	FALSE	null	1	NA
ENSMUSG00000052544	St6galnac3	C	TRUE	sinusoidal	2.57478	4.91835	FALSE	null	1	NA
ENSMUSG00000053070	9230110C19Rik	C	TRUE	sigmoid	1.74956	10.79	FALSE	null	1	NA
ENSMUSG00000054517	Trim65	C	TRUE	sigmoid	1.65942	16.3	FALSE	null	1	NA
ENSMUSG00000054717	Hmgb2	C	TRUE	sinusoidal	1.65911	6.95681	FALSE	sinusoidal	1.46745	7.46921
ENSMUSG00000054932	Afp	C	TRUE	sinusoidal	1.91789	6.78125	FALSE	null	1	NA
ENSMUSG00000055254	Ntrk2	C	TRUE	sinusoidal	2.45164	7.83773	FALSE	null	1	NA
ENSMUSG00000055652	Klhl25	C	TRUE	sigmoid	1.6969	15.92	FALSE	sigmoid	1.44634	15.955
ENSMUSG00000055717	Slain1	C	TRUE	sinusoidal	1.76066	4.6006	FALSE	null	1	NA
ENSMUSG00000055782	Abcd2	C	TRUE	sinusoidal	4.27762	5.3462	FALSE	null	1	NA
ENSMUSG00000055963	Triqk	C	TRUE	sinusoidal	2.24436	5.19799	FALSE	null	1	NA
ENSMUSG00000056116	H2-T22	C	TRUE	sinusoidal	1.60523	3.47838	FALSE	null	1	NA
ENSMUSG00000056234	Ncoa4	C	TRUE	sigmoid	1.55096	16.22	FALSE	sinusoidal	1.4937	15.8521
ENSMUSG00000056598	Lrrc48	C	TRUE	sinusoidal	1.49652	10.5373	FALSE	sinusoidal	1.43141	9.39746
ENSMUSG00000056938	Acbd4	C	TRUE	sigmoid	1.5389	18.235	FALSE	null	1	NA
ENSMUSG00000057054	Inca1	C	TRUE	sinusoidal	1.71481	9.62599	FALSE	null	1	NA
ENSMUSG00000057400	Ces1c	C	TRUE	sigmoid	2.43955	15.365	FALSE	null	1	NA
ENSMUSG00000057858	D19Ertd737e	C	TRUE	sinusoidal	1.67621	7.51483	FALSE	sinusoidal	1.45216	7.62971
ENSMUSG00000058056	Palld	C	TRUE	sigmoid	1.54137	14.32	FALSE	null	1	NA
ENSMUSG00000058173	Smco4	C	TRUE	sigmoid	1.52038	3.765	FALSE	sinusoidal	1.3374	3.95276
ENSMUSG00000058248	Kcnh1	C	TRUE	sinusoidal	4.20816	9.16023	FALSE	null	1	NA
ENSMUSG00000058297	Spock2	C	TRUE	sinusoidal	1.81513	12.3941	FALSE	null	1	NA
ENSMUSG00000058952	Cfi	C	TRUE	sigmoid	1.60604	15.665	FALSE	null	1	NA
ENSMUSG00000059089	Fcgr4	C	TRUE	sinusoidal	1.51419	3.84503	FALSE	null	1	NA
ENSMUSG00000059309	Hist1h3f	C	TRUE	sinusoidal	1.82737	4.50972	FALSE	null	1	NA
ENSMUSG00000059479	B3gnt8	C	TRUE	sinusoidal	1.99829	13.8084	FALSE	null	1	NA
ENSMUSG00000059669	Taf1b	C	TRUE	sinusoidal	1.5456	6.74459	FALSE	null	1	NA
ENSMUSG00000060548	Tnfrsf19	C	TRUE	sinusoidal	2.13642	23.3685	FALSE	null	1	NA
ENSMUSG00000060579	Fhit	C	TRUE	sinusoidal	1.69012	16.3672	FALSE	null	1	NA
ENSMUSG00000060950	Trmt61a	C	TRUE	sinusoidal	1.57602	17.8869	FALSE	null	1	NA
ENSMUSG00000061028	Clasrp	C	TRUE	sinusoidal	1.66151	4.69009	FALSE	sinusoidal	1.38347	8.3583
ENSMUSG00000061175	Fnip2	C	TRUE	sigmoid	1.64838	10.755	FALSE	sigmoid	1.43959	10.45
ENSMUSG00000061353	Cxcl12	C	TRUE	sinusoidal	1.64359	14.1801	FALSE	null	1	NA
ENSMUSG00000061650	Med9	C	TRUE	sinusoidal	1.64928	3.64448	FALSE	null	1	NA
ENSMUSG00000062761	Zfp512	C	TRUE	sinusoidal	1.50331	3.73684	FALSE	sinusoidal	1.4537	4.26245
ENSMUSG00000062825	Actg1	C	TRUE	sinusoidal	1.54827	18.0803	FALSE	null	1	NA
ENSMUSG00000063765	Chadl	C	TRUE	sinusoidal	2.59786	15.2227	FALSE	sinusoidal	1.4734	8.03807
ENSMUSG00000064294	Aox3	C	TRUE	sinusoidal	2.24261	10.9689	FALSE	null	1	NA
ENSMUSG00000066026	Dhrs3	C	TRUE	sinusoidal	1.61183	23.1958	FALSE	null	1	NA
ENSMUSG00000066058	Cldn19	C	TRUE	sigmoid	1.69142	14.025	FALSE	null	1	NA
ENSMUSG00000066551	Hmgb1	C	TRUE	sigmoid	1.54557	7.885	FALSE	null	1	NA
ENSMUSG00000066829	Zfp810	C	TRUE	sinusoidal	1.67355	7.55664	FALSE	null	1	NA
ENSMUSG00000067219	Nipal1	C	TRUE	sinusoidal	1.98709	7.42786	FALSE	null	1	NA
ENSMUSG00000069922	Ces3a	C	TRUE	sinusoidal	3.40953	15.2997	FALSE	null	1	NA
ENSMUSG00000070003	Ssbp4	C	TRUE	sinusoidal	1.62389	4.52084	FALSE	null	1	NA
ENSMUSG00000070034	Sp110	C	TRUE	sinusoidal	1.63532	5.19868	FALSE	null	1	NA
ENSMUSG00000070639	Lrrc8b	C	TRUE	sinusoidal	1.66236	9.14201	FALSE	sinusoidal	1.44425	9.49165
ENSMUSG00000071335	G630090E17Rik	C	TRUE	sinusoidal	1.89282	23.5407	FALSE	sinusoidal	1.39114	1.0284
ENSMUSG00000071644	Eef1g	C	TRUE	sinusoidal	1.53125	18.3432	FALSE	sinusoidal	1.18616	22.5493
ENSMUSG00000072214	Sept5	C	TRUE	sinusoidal	2.00627	2.03853	FALSE	null	1	NA
ENSMUSG00000072294	Klf12	C	TRUE	sinusoidal	1.55073	7.8348	FALSE	null	1	NA
ENSMUSG00000072568	Fam84b	C	TRUE	sigmoid	1.61047	16.16	FALSE	null	1	NA
ENSMUSG00000072704	2700089E24Rik	C	TRUE	sigmoid	1.84784	19.495	FALSE	null	1	NA
ENSMUSG00000072964	Bhlhb9	C	TRUE	sinusoidal	1.62375	7.52832	FALSE	null	1	NA
ENSMUSG00000072969	Armcx5	C	TRUE	sinusoidal	1.5847	8.12891	FALSE	null	1	NA
ENSMUSG00000073468	Sft2d1	C	TRUE	sigmoid	2.26713	20.3	FALSE	null	1	NA
ENSMUSG00000074261	Gm7092	C	TRUE	sinusoidal	1.6418	0.4066	FALSE	sinusoidal	1.26243	2.03535
ENSMUSG00000074476	Spc24	C	TRUE	sinusoidal	1.81451	11.8399	FALSE	null	1	NA
ENSMUSG00000074743	Thbd	C	TRUE	sinusoidal	1.67451	17.6035	FALSE	sinusoidal	1.44054	18.0979
ENSMUSG00000074796	Slc4a11	C	TRUE	sinusoidal	1.67725	6.83722	FALSE	sinusoidal	1.45771	8.22411
ENSMUSG00000074802	Gas2l3	C	TRUE	sinusoidal	2.21424	9.50039	FALSE	null	1	NA
ENSMUSG00000075043	Tmem223	C	TRUE	sinusoidal	2.68553	3.22012	FALSE	null	1	NA
ENSMUSG00000078350	Smim1	C	TRUE	sinusoidal	1.53343	17.7014	FALSE	null	1	NA
ENSMUSG00000079015	Serpina1c	C	TRUE	sigmoid	3.4983	15.095	FALSE	null	1	NA
ENSMUSG00000079017	Ifi27l2a	C	TRUE	sinusoidal	1.72847	7.05242	FALSE	null	1	NA
ENSMUSG00000079036	Alkbh1	C	TRUE	sinusoidal	1.71338	18.2584	FALSE	null	1	NA
ENSMUSG00000079277	Hoxd3	C	TRUE	sinusoidal	1.95827	19.185	FALSE	null	1	NA
ENSMUSG00000079442	St6galnac4	C	TRUE	sinusoidal	1.77845	11.9694	FALSE	null	1	NA
ENSMUSG00000079610	Ankrd39	C	TRUE	sinusoidal	1.69898	13.2125	FALSE	null	1	NA
ENSMUSG00000082361	Btc	C	TRUE	sigmoid	1.92574	15.465	FALSE	sinusoidal	1.44107	18.342
ENSMUSG00000084786	Ubl5	C	TRUE	sigmoid	1.99564	15.885	FALSE	sinusoidal	1.17736	20.7813
ENSMUSG00000089960	Ugt1a1	C	TRUE	sinusoidal	2.77903	14.2714	FALSE	null	1	NA
ENSMUSG00000089989	Flt3l	C	TRUE	sigmoid	1.85655	4.2	FALSE	null	1	NA
ENSMUSG00000090698	Apold1	C	TRUE	sigmoid	2.84067	5.24	FALSE	null	1	NA
ENSMUSG00000091243	Vgll3	C	TRUE	sinusoidal	2.11812	2.09043	FALSE	null	1	NA
ENSMUSG00000091537	Tma7	C	TRUE	sinusoidal	1.58509	3.81024	FALSE	null	1	NA
ENSMUSG00000091747	D17H6S56E-5	C	TRUE	sigmoid	1.69293	15.075	FALSE	null	1	NA
ENSMUSG00000093938	Evi2b	C	TRUE	sigmoid	3.24166	4.115	FALSE	null	1	NA
ENSMUSG00000095832	Supt20	C	TRUE	sinusoidal	1.59853	22.545	FALSE	null	1	NA
ENSMUSG00000096210	H1f0	C	TRUE	sigmoid	1.6679	6.9	FALSE	null	1	NA
ENSMUSG00000000120	Ngfr	D	TRUE	sinusoidal	1.83187	3.0932	TRUE	sinusoidal	2.94217	4.59654
ENSMUSG00000000305	Cdh4	D	TRUE	sigmoid	2.11391	7.915	TRUE	sigmoid	2.04773	8.8
ENSMUSG00000000317	Bcl6b	D	TRUE	sinusoidal	2.66731	5.9926	TRUE	sinusoidal	1.71816	6.72684
ENSMUSG00000000325	Arvcf	D	TRUE	sinusoidal	2.74092	0.678845	TRUE	sinusoidal	1.68366	4.02123
ENSMUSG00000000531	Grasp	D	TRUE	sinusoidal	1.56991	11.2434	TRUE	sinusoidal	1.73928	11.7733
ENSMUSG00000000552	Zfp385a	D	TRUE	sinusoidal	1.65093	5.14341	TRUE	sinusoidal	1.67006	6.61703
ENSMUSG00000000901	Mmp11	D	TRUE	sinusoidal	1.89105	5.37527	TRUE	sinusoidal	1.66152	4.78554
ENSMUSG00000000957	Mmp14	D	TRUE	sinusoidal	1.79386	4.14044	TRUE	sinusoidal	1.64128	3.84224
ENSMUSG00000001270	Ckb	D	TRUE	sinusoidal	1.5391	23.4978	TRUE	sinusoidal	1.57027	22.6921
ENSMUSG00000001349	Cnn1	D	TRUE	sinusoidal	3.22361	3.9825	TRUE	sinusoidal	3.187	3.77148
ENSMUSG00000001774	Chordc1	D	TRUE	sinusoidal	1.96363	18.894	TRUE	sinusoidal	2.05087	19.3143
ENSMUSG00000002055	Spag5	D	TRUE	sigmoid	2.2844	15.615	TRUE	sigmoid	1.91632	15.77
ENSMUSG00000002250	Ppard	D	TRUE	sigmoid	6.0752	1.765	TRUE	sinusoidal	7.5999	0.888539
ENSMUSG00000002265	Peg3	D	TRUE	sinusoidal	1.67379	4.75945	TRUE	sinusoidal	1.53029	4.29052
ENSMUSG00000002409	Dyrk1b	D	TRUE	sinusoidal	1.64382	5.47993	TRUE	sinusoidal	1.5596	5.87689
ENSMUSG00000002797	Ggct	D	TRUE	sinusoidal	1.93931	2.96772	TRUE	sinusoidal	1.68904	2.70519
ENSMUSG00000003411	Rab3b	D	TRUE	sinusoidal	2.04242	5.28607	TRUE	sinusoidal	1.69978	6.43092
ENSMUSG00000003541	Ier3	D	TRUE	sinusoidal	2.28366	15.2794	TRUE	sinusoidal	3.00678	14.8232
ENSMUSG00000003814	Calr	D	TRUE	sinusoidal	1.64267	22.5352	TRUE	sinusoidal	1.7432	21.8204
ENSMUSG00000003949	Hlf	D	TRUE	sinusoidal	1.61929	12.1141	TRUE	sinusoidal	1.82844	14.5508
ENSMUSG00000004098	Col5a3	D	TRUE	sinusoidal	2.12035	5.70451	TRUE	sinusoidal	2.15917	4.48384
ENSMUSG00000004105	Angptl2	D	TRUE	sigmoid	1.62746	13.365	TRUE	sigmoid	1.53371	13.58
ENSMUSG00000004891	Nes	D	TRUE	sigmoid	1.53144	4.455	TRUE	sinusoidal	1.56984	5.21393
ENSMUSG00000005107	Slc2a9	D	TRUE	sigmoid	1.64884	13.565	TRUE	sigmoid	1.7031	14
ENSMUSG00000005125	Ndrg1	D	TRUE	sigmoid	3.37701	23.725	TRUE	sinusoidal	2.78554	23.7065
ENSMUSG00000005251	Ripk4	D	TRUE	sinusoidal	1.81243	14.2226	TRUE	sinusoidal	1.53673	12.7951
ENSMUSG00000005268	Prlr	D	TRUE	sigmoid	3.99369	15.975	TRUE	sigmoid	4.27903	15.995
ENSMUSG00000005483	Dnajb1	D	TRUE	sigmoid	2.116	14.11	TRUE	sigmoid	2.45945	14.145
ENSMUSG00000005547	Cyp2a5	D	TRUE	sinusoidal	1.98906	14.5402	TRUE	sinusoidal	1.99403	14.9772
ENSMUSG00000006456	Rbm14	D	TRUE	sigmoid	1.6064	14.78	TRUE	sigmoid	1.6872	14.285
ENSMUSG00000006641	Slc5a6	D	TRUE	sigmoid	1.96704	10.89	TRUE	sigmoid	1.94866	13.47
ENSMUSG00000006930	Hap1	D	TRUE	sigmoid	1.71134	8.385	TRUE	sinusoidal	2.29018	7.96484
ENSMUSG00000009092	Derl3	D	TRUE	sigmoid	2.97136	19.645	TRUE	sigmoid	3.30112	18.9
ENSMUSG00000009145	Dqx1	D	TRUE	sigmoid	1.92661	11.645	TRUE	sigmoid	1.92579	9.025
ENSMUSG00000009739	Pou6f1	D	TRUE	sinusoidal	1.5961	7.04441	TRUE	sinusoidal	1.61283	8.00751
ENSMUSG00000009772	Nuak2	D	TRUE	sinusoidal	1.87072	16.5493	TRUE	sinusoidal	1.78266	15.8497
ENSMUSG00000010044	Zmynd10	D	TRUE	sinusoidal	1.51652	9.69041	TRUE	sigmoid	1.51322	12.34
ENSMUSG00000010307	Tmem86a	D	TRUE	sinusoidal	2.14485	6.05681	TRUE	sigmoid	2.73127	9.45
ENSMUSG00000011256	Adam19	D	TRUE	sinusoidal	2.02797	2.67303	TRUE	sigmoid	1.61987	0.19
ENSMUSG00000011305	Plin5	D	TRUE	sinusoidal	1.69831	9.24847	TRUE	sinusoidal	1.93558	9.04765
ENSMUSG00000013275	Slc41a1	D	TRUE	sigmoid	1.69505	11.335	TRUE	sinusoidal	1.51099	9.47993
ENSMUSG00000014905	Dnajb9	D	TRUE	sigmoid	1.7612	16.035	TRUE	sigmoid	1.67102	15.87
ENSMUSG00000015090	Ptgds	D	TRUE	sigmoid	1.74136	15.84	TRUE	sigmoid	1.93096	15.895
ENSMUSG00000015093	Clic3	D	TRUE	sinusoidal	1.69562	5.62242	TRUE	sigmoid	1.58377	6.85
ENSMUSG00000015357	Clpx	D	TRUE	sinusoidal	2.19291	0.0305001	TRUE	sigmoid	2.10654	23.485
ENSMUSG00000015656	Hspa8	D	TRUE	sigmoid	2.19757	15.045	TRUE	sigmoid	2.06352	15.46
ENSMUSG00000015890	Amdhd1	D	TRUE	sinusoidal	2.07301	5.83526	TRUE	sinusoidal	2.75179	5.18025
ENSMUSG00000017146	Brca1	D	TRUE	sigmoid	2.27095	23.97	TRUE	sinusoidal	1.89943	23.3462
ENSMUSG00000017309	Cd300lg	D	TRUE	sinusoidal	1.62144	9.51607	TRUE	sinusoidal	1.62782	9.65233
ENSMUSG00000017314	Mpp2	D	TRUE	sinusoidal	1.90582	13.835	TRUE	sinusoidal	1.73942	13.3037
ENSMUSG00000017493	Igfbp4	D	TRUE	sinusoidal	1.63669	12.0019	TRUE	sinusoidal	1.83744	10.4676
ENSMUSG00000017677	Wsb1	D	TRUE	sinusoidal	1.51446	22.3136	TRUE	sinusoidal	1.68574	23.7552
ENSMUSG00000017697	Ada	D	TRUE	sinusoidal	1.69934	5.38752	TRUE	sigmoid	1.8472	3.985
ENSMUSG00000017969	Ptgis	D	TRUE	sinusoidal	1.85497	13.3852	TRUE	sinusoidal	2.17036	14.0313
ENSMUSG00000018166	Erbb3	D	TRUE	sinusoidal	1.71146	5.26069	TRUE	sinusoidal	1.96875	4.97441
ENSMUSG00000018427	Ypel2	D	TRUE	sinusoidal	4.25406	22.3602	TRUE	sinusoidal	4.65962	22.246
ENSMUSG00000018537	Pcgf2	D	TRUE	sinusoidal	1.53266	2.30087	TRUE	sinusoidal	2.24707	5.44031
ENSMUSG00000018830	Myh11	D	TRUE	sinusoidal	1.68713	4.63503	TRUE	sinusoidal	1.65489	6.17559
ENSMUSG00000019082	Slc25a22	D	TRUE	sinusoidal	1.7054	0.729369	TRUE	sinusoidal	1.64938	0.850044
ENSMUSG00000019232	Etnppl	D	TRUE	sinusoidal	1.5118	11.3827	TRUE	sinusoidal	1.50456	11.27
ENSMUSG00000019823	Mical1	D	TRUE	sinusoidal	2.0088	4.33366	TRUE	sinusoidal	1.54061	5.4587
ENSMUSG00000019856	Fam184a	D	TRUE	sinusoidal	1.78937	1.47037	TRUE	sinusoidal	1.65267	1.05719
ENSMUSG00000019874	Fabp7	D	TRUE	sinusoidal	2.97066	2.48533	TRUE	sinusoidal	2.63823	2.23706
ENSMUSG00000019906	Lin7a	D	TRUE	sinusoidal	2.10282	15.3213	TRUE	sinusoidal	1.74954	14.3888
ENSMUSG00000019916	P4ha1	D	TRUE	sinusoidal	1.56585	19.5872	TRUE	sinusoidal	1.81164	20.137
ENSMUSG00000019944	Rhobtb1	D	TRUE	sigmoid	1.93299	18.505	TRUE	sigmoid	2.29196	22.18
ENSMUSG00000019970	Sgk1	D	TRUE	sigmoid	2.33148	15.375	TRUE	sinusoidal	2.76511	15.6921
ENSMUSG00000019997	Ctgf	D	TRUE	sinusoidal	2.15685	14.5027	TRUE	sinusoidal	1.81722	14.6407
ENSMUSG00000020038	Cry1	D	TRUE	sinusoidal	9.97905	18.2815	TRUE	sinusoidal	8.44656	18.5393
ENSMUSG00000020048	Hsp90b1	D	TRUE	sinusoidal	1.70665	21.5672	TRUE	sinusoidal	1.97347	20.8739
ENSMUSG00000020091	Eif4ebp2	D	TRUE	sinusoidal	1.61367	4.71555	TRUE	sinusoidal	1.70845	6.3865
ENSMUSG00000020121	Srgap1	D	TRUE	sinusoidal	1.56769	2.97247	TRUE	sinusoidal	1.65899	2.68611
ENSMUSG00000020123	Avpr1a	D	TRUE	sinusoidal	3.10474	23.1548	TRUE	sinusoidal	3.61247	0.485191
ENSMUSG00000020131	Pcsk4	D	TRUE	sinusoidal	3.68935	11.8511	TRUE	sigmoid	1.79705	10.925
ENSMUSG00000020181	Nav3	D	TRUE	sinusoidal	2.244	5.07539	TRUE	sinusoidal	2.01782	4.04363
ENSMUSG00000020182	Ddc	D	TRUE	sinusoidal	2.57075	1.62562	TRUE	sinusoidal	2.35385	1.74117
ENSMUSG00000020189	Osbpl8	D	TRUE	sinusoidal	1.71864	23.5713	TRUE	sigmoid	1.97869	21.935
ENSMUSG00000020190	Mknk2	D	TRUE	sinusoidal	1.53237	13.006	TRUE	sigmoid	1.75841	13.74
ENSMUSG00000020287	Mpg	D	TRUE	sinusoidal	1.51931	6.445	TRUE	sinusoidal	1.59516	7.53576
ENSMUSG00000020288	Ahsa2	D	TRUE	sinusoidal	1.70065	19.2444	TRUE	sinusoidal	2.03439	18.9645
ENSMUSG00000020377	Ltc4s	D	TRUE	sigmoid	1.63579	15.07	TRUE	sinusoidal	1.87075	16.6982
ENSMUSG00000020381	3010026O09Rik	D	TRUE	sinusoidal	2.43574	4.22721	TRUE	sinusoidal	2.04643	5.66973
ENSMUSG00000020424	Gatsl3	D	TRUE	sinusoidal	1.51544	11.5509	TRUE	sinusoidal	1.72718	11.6038
ENSMUSG00000020427	Igfbp3	D	TRUE	sinusoidal	1.74433	6.50738	TRUE	sinusoidal	1.87283	6.69414
ENSMUSG00000020429	Igfbp1	D	TRUE	sigmoid	6.09017	6.215	TRUE	sigmoid	6.22328	6.38
ENSMUSG00000020538	Srebf1	D	TRUE	sinusoidal	1.90499	19.586	TRUE	sinusoidal	1.60071	19.6211
ENSMUSG00000020564	Atxn7l1	D	TRUE	sigmoid	1.63486	3.86	TRUE	sinusoidal	1.61045	6.2702
ENSMUSG00000020571	Pdia6	D	TRUE	sigmoid	1.63721	22.215	TRUE	sinusoidal	1.62332	21.7674
ENSMUSG00000020572	Nampt	D	TRUE	sinusoidal	1.70818	14.5771	TRUE	sinusoidal	1.66473	16.4471
ENSMUSG00000020604	Arsg	D	TRUE	sigmoid	2.20158	3.365	TRUE	sinusoidal	1.98425	3.05247
ENSMUSG00000020614	Fam20a	D	TRUE	sinusoidal	1.92029	2.80034	TRUE	sinusoidal	1.89335	3.58357
ENSMUSG00000020623	Map2k6	D	TRUE	sinusoidal	1.54845	10.4669	TRUE	sinusoidal	1.57966	8.66269
ENSMUSG00000020641	Rsad2	D	TRUE	sinusoidal	1.5839	0.0939231	TRUE	sinusoidal	1.65711	23.8719
ENSMUSG00000020653	Klf11	D	TRUE	sigmoid	2.33525	4.14	TRUE	sinusoidal	2.52522	6.21887
ENSMUSG00000020679	Hnf1b	D	TRUE	sinusoidal	2.08588	2.80878	TRUE	sinusoidal	1.88832	3.71039
ENSMUSG00000020718	Polg2	D	TRUE	sigmoid	1.59868	8.79	TRUE	sinusoidal	1.51494	8.0384
ENSMUSG00000020741	Cluh	D	TRUE	sinusoidal	1.58138	0.714077	TRUE	sinusoidal	1.58347	1.91727
ENSMUSG00000020810	Cygb	D	TRUE	sinusoidal	1.68244	11.3181	TRUE	sinusoidal	1.82255	11.2673
ENSMUSG00000020826	Nos2	D	TRUE	sinusoidal	2.76375	4.87695	TRUE	sinusoidal	1.67299	4.46747
ENSMUSG00000020838	Slc6a4	D	TRUE	sinusoidal	2.20797	8.62455	TRUE	sinusoidal	1.80996	11.5441
ENSMUSG00000020882	Cacnb1	D	TRUE	sinusoidal	2.18877	5.68968	TRUE	sinusoidal	1.63	8.87566
ENSMUSG00000020889	Nr1d1	D	TRUE	sigmoid	12.9507	6.795	TRUE	sinusoidal	29.036	7.41683
ENSMUSG00000020893	Per1	D	TRUE	sigmoid	4.07939	10.27	TRUE	sigmoid	3.89938	10.97
ENSMUSG00000020894	Vamp2	D	TRUE	sinusoidal	1.50719	7.67795	TRUE	sinusoidal	1.93613	7.94813
ENSMUSG00000020904	Wdr16	D	TRUE	sinusoidal	2.41716	9.35896	TRUE	sinusoidal	2.06495	10.9363
ENSMUSG00000021037	Ahsa1	D	TRUE	sinusoidal	1.49928	20.749	TRUE	sinusoidal	1.53994	19.843
ENSMUSG00000021240	Abcd4	D	TRUE	sigmoid	1.68847	11.46	TRUE	sinusoidal	1.9005	8.55872
ENSMUSG00000021257	Angel1	D	TRUE	sinusoidal	1.79399	7.06175	TRUE	sinusoidal	1.54087	5.48817
ENSMUSG00000021270	Hsp90aa1	D	TRUE	sinusoidal	1.76248	20.6575	TRUE	sinusoidal	2.11603	20.0063
ENSMUSG00000021311	Mtr	D	TRUE	sinusoidal	1.5854	22.9174	TRUE	sigmoid	1.52614	1.5
ENSMUSG00000021336	Slc17a4	D	TRUE	sinusoidal	2.3987	7.91798	TRUE	sinusoidal	2.19774	7.79288
ENSMUSG00000021384	Susd3	D	TRUE	sinusoidal	1.92367	14.2445	TRUE	sinusoidal	2.00737	13.6961
ENSMUSG00000021483	Cdk20	D	TRUE	sinusoidal	1.77716	19.1887	TRUE	sinusoidal	1.62557	20.7117
ENSMUSG00000021508	Cxcl14	D	TRUE	sinusoidal	1.52452	6.49033	TRUE	sinusoidal	1.60398	6.47746
ENSMUSG00000021559	Dapk1	D	TRUE	sinusoidal	1.53591	0.476577	TRUE	sinusoidal	1.67696	1.07233
ENSMUSG00000021565	Slc6a19	D	TRUE	sigmoid	1.9657	8.645	TRUE	sigmoid	2.00886	6.275
ENSMUSG00000021702	Thbs4	D	TRUE	sinusoidal	3.3849	16.6738	TRUE	sinusoidal	2.88669	15.9052
ENSMUSG00000021775	Nr1d2	D	TRUE	sinusoidal	6.12093	10.3403	TRUE	sinusoidal	4.79302	10.2525
ENSMUSG00000022012	Enox1	D	TRUE	sigmoid	2.28672	14.165	TRUE	sinusoidal	1.8983	17.0997
ENSMUSG00000022018	Rgcc	D	TRUE	sigmoid	1.82841	14.015	TRUE	sinusoidal	2.03565	14.1954
ENSMUSG00000022215	Fitm1	D	TRUE	sinusoidal	1.59973	14.2014	TRUE	sinusoidal	1.87833	14.7317
ENSMUSG00000022218	Tgm1	D	TRUE	sinusoidal	1.98715	11.6107	TRUE	sinusoidal	1.95653	11.2962
ENSMUSG00000022229	Atp12a	D	TRUE	sinusoidal	70.2423	4.54338	TRUE	sinusoidal	6.22944	4.71189
ENSMUSG00000022262	Dnah5	D	TRUE	sinusoidal	2.50903	14.2482	TRUE	sinusoidal	1.57539	13.9441
ENSMUSG00000022305	Lrp12	D	TRUE	sigmoid	1.63794	12.955	TRUE	sinusoidal	1.63188	14.7985
ENSMUSG00000022372	Sla	D	TRUE	sigmoid	2.45694	14.915	TRUE	sinusoidal	1.74766	16.0152
ENSMUSG00000022389	Tef	D	TRUE	sinusoidal	2.746	11.0774	TRUE	sinusoidal	2.94435	11.3853
ENSMUSG00000022425	Enpp2	D	TRUE	sinusoidal	1.52635	15.5014	TRUE	sinusoidal	1.56385	16.5915
ENSMUSG00000022462	Slc38a2	D	TRUE	sigmoid	1.62728	15.095	TRUE	sigmoid	1.64641	15.69
ENSMUSG00000022512	Cldn1	D	TRUE	sinusoidal	1.72959	0.917535	TRUE	sinusoidal	1.73085	0.951189
ENSMUSG00000022550	Adck5	D	TRUE	sinusoidal	1.62706	2.24334	TRUE	sinusoidal	1.79038	4.5841
ENSMUSG00000022579	Gpihbp1	D	TRUE	sinusoidal	2.14046	9.07677	TRUE	sinusoidal	2.00648	9.59386
ENSMUSG00000022769	Sdf2l1	D	TRUE	sinusoidal	3.38305	20.1736	TRUE	sigmoid	2.41905	16.385
ENSMUSG00000022797	Tfrc	D	TRUE	sinusoidal	1.60977	22.2383	TRUE	sinusoidal	1.98481	21.4698
ENSMUSG00000022843	Clcn2	D	TRUE	sinusoidal	1.50837	12.3406	TRUE	sinusoidal	1.69023	12.0574
ENSMUSG00000022861	Dgkg	D	TRUE	sinusoidal	2.98608	3.24605	TRUE	sinusoidal	3.08625	2.96691
ENSMUSG00000022893	Adamts1	D	TRUE	sinusoidal	1.51557	18.7534	TRUE	sinusoidal	1.56223	18.1795
ENSMUSG00000022951	Rcan1	D	TRUE	sigmoid	2.04073	14.505	TRUE	sigmoid	1.90878	14.5
ENSMUSG00000023013	Aqp2	D	TRUE	sinusoidal	1.77981	15.8729	TRUE	sinusoidal	1.75003	14.8844
ENSMUSG00000023067	Cdkn1a	D	TRUE	sinusoidal	2.42251	23.1261	TRUE	sigmoid	2.504	0.775
ENSMUSG00000023073	Slc10a2	D	TRUE	sigmoid	2.10762	22.24	TRUE	sigmoid	2.18194	20.78
ENSMUSG00000023272	Creld2	D	TRUE	sigmoid	2.74264	15.94	TRUE	sigmoid	2.41684	18.2
ENSMUSG00000023328	Ache	D	TRUE	sigmoid	2.17702	15.565	TRUE	sinusoidal	2.17532	12.8336
ENSMUSG00000023755	Rhebl1	D	TRUE	sinusoidal	1.9498	3.39208	TRUE	sinusoidal	2.00268	4.13846
ENSMUSG00000023826	Park2	D	TRUE	sinusoidal	1.82017	10.4043	TRUE	sinusoidal	1.82016	11.8323
ENSMUSG00000023915	Tnfrsf21	D	TRUE	sinusoidal	2.06256	12.1035	TRUE	sinusoidal	1.81987	12.2346
ENSMUSG00000024030	Abcg1	D	TRUE	sigmoid	1.92883	14.425	TRUE	sinusoidal	1.55316	16.1362
ENSMUSG00000024042	Sik1	D	TRUE	sinusoidal	1.58976	13.4441	TRUE	sinusoidal	1.58547	12.8905
ENSMUSG00000024165	Hn1l	D	TRUE	sinusoidal	1.59222	23.6646	TRUE	sinusoidal	1.65882	23.334
ENSMUSG00000024177	Nme4	D	TRUE	sinusoidal	1.50623	7.52012	TRUE	sinusoidal	1.80364	8.55495
ENSMUSG00000024188	Luc7l	D	TRUE	sinusoidal	2.33549	18.3073	TRUE	sinusoidal	1.49504	18.8354
ENSMUSG00000024222	Fkbp5	D	TRUE	sigmoid	2.12242	15.015	TRUE	sigmoid	1.71625	15.715
ENSMUSG00000024352	Spata24	D	TRUE	sinusoidal	1.76334	10.8889	TRUE	sinusoidal	1.62223	11.5448
ENSMUSG00000024411	Aqp4	D	TRUE	sigmoid	2.06555	15.81	TRUE	sigmoid	1.77116	16.025
ENSMUSG00000024440	Pcdh12	D	TRUE	sinusoidal	1.95882	2.05948	TRUE	sinusoidal	1.90543	1.61974
ENSMUSG00000024579	Pcyox1l	D	TRUE	sinusoidal	1.66128	21.9154	TRUE	sinusoidal	1.65029	22.5762
ENSMUSG00000024661	Fth1	D	TRUE	sinusoidal	1.5039	6.83116	TRUE	sinusoidal	1.75196	4.23487
ENSMUSG00000024736	Tmem132a	D	TRUE	sinusoidal	1.59352	2.00996	TRUE	sinusoidal	1.56341	2.18964
ENSMUSG00000024827	Gldc	D	TRUE	sigmoid	1.91569	15.56	TRUE	sigmoid	1.82437	15.585
ENSMUSG00000024867	Pip5k1b	D	TRUE	sinusoidal	1.67594	5.10456	TRUE	sinusoidal	1.51287	3.61898
ENSMUSG00000024966	Stip1	D	TRUE	sinusoidal	1.52194	19.6256	TRUE	sigmoid	1.58341	15.355
ENSMUSG00000025178	Pi4k2a	D	TRUE	sinusoidal	1.65841	22.736	TRUE	sigmoid	1.72054	1.995
ENSMUSG00000025185	Loxl4	D	TRUE	sinusoidal	2.80602	1.31961	TRUE	sinusoidal	2.58827	1.32763
ENSMUSG00000025203	Scd2	D	TRUE	sinusoidal	1.8673	18.8009	TRUE	sinusoidal	1.66294	19.0221
ENSMUSG00000025257	Ribc1	D	TRUE	sinusoidal	1.78008	5.95023	TRUE	sinusoidal	1.50093	6.71844
ENSMUSG00000025271	Pfkfb1	D	TRUE	sinusoidal	1.73084	8.45669	TRUE	sinusoidal	1.96348	7.65876
ENSMUSG00000025355	Mmp19	D	TRUE	sigmoid	2.75915	15.7	TRUE	sigmoid	2.62091	15.725
ENSMUSG00000025372	Baiap2	D	TRUE	sigmoid	1.67774	13.635	TRUE	sigmoid	1.95841	14.165
ENSMUSG00000025375	Aatk	D	TRUE	sinusoidal	1.86778	7.69283	TRUE	sinusoidal	1.94133	9.05909
ENSMUSG00000025408	Ddit3	D	TRUE	sigmoid	2.46867	14.945	TRUE	sigmoid	2.27447	14.17
ENSMUSG00000025429	Pstpip2	D	TRUE	sigmoid	1.52359	10.235	TRUE	sinusoidal	1.77807	6.3941
ENSMUSG00000025491	Ifitm1	D	TRUE	sinusoidal	1.81283	16.6706	TRUE	sinusoidal	1.84374	15.4056
ENSMUSG00000025509	Pnpla2	D	TRUE	sinusoidal	1.54165	7.78075	TRUE	sinusoidal	1.86397	8.24221
ENSMUSG00000025511	Tspan4	D	TRUE	sinusoidal	2.81456	13.8193	TRUE	sinusoidal	1.94739	13.7033
ENSMUSG00000025574	Tk1	D	TRUE	sinusoidal	2.16826	14.7291	TRUE	sinusoidal	1.86972	14.457
ENSMUSG00000025577	Cbx2	D	TRUE	sinusoidal	1.91559	4.59646	TRUE	sigmoid	1.63833	6.05
ENSMUSG00000025776	Crispld1	D	TRUE	sinusoidal	1.61025	20.2118	TRUE	sinusoidal	1.73068	20.551
ENSMUSG00000025815	Dhtkd1	D	TRUE	sinusoidal	1.58429	11.4779	TRUE	sinusoidal	1.57598	10.7879
ENSMUSG00000025823	Pdia4	D	TRUE	sigmoid	1.51119	16.47	TRUE	sinusoidal	1.66431	19.5994
ENSMUSG00000025867	Cplx2	D	TRUE	sinusoidal	1.54614	9.62288	TRUE	sigmoid	2.14512	11.895
ENSMUSG00000025921	Rdh10	D	TRUE	sinusoidal	1.9361	23.16	TRUE	sigmoid	2.18129	23.075
ENSMUSG00000025978	Rftn2	D	TRUE	sinusoidal	1.90178	4.3603	TRUE	sigmoid	1.63814	6.815
ENSMUSG00000025981	Coq10b	D	TRUE	sigmoid	2.61256	12.095	TRUE	sinusoidal	2.24057	13.1991
ENSMUSG00000026043	Col3a1	D	TRUE	sinusoidal	1.70037	4.42699	TRUE	sinusoidal	1.77449	4.3442
ENSMUSG00000026077	Npas2	D	TRUE	sigmoid	19.1389	0.06	TRUE	sigmoid	11.1983	0.285
ENSMUSG00000026121	Sema4c	D	TRUE	sinusoidal	1.58677	3.28802	TRUE	sinusoidal	1.98154	4.53572
ENSMUSG00000026202	Tuba4a	D	TRUE	sinusoidal	1.53569	20.7058	TRUE	sinusoidal	1.50081	19.7215
ENSMUSG00000026220	Slc16a14	D	TRUE	sinusoidal	2.08374	16.0085	TRUE	sinusoidal	2.11128	15.9537
ENSMUSG00000026348	Acmsd	D	TRUE	sinusoidal	2.06841	1.20756	TRUE	sinusoidal	2.40963	0.912152
ENSMUSG00000026532	Spta1	D	TRUE	sigmoid	8.5615	15.79	TRUE	sigmoid	4.0821	15.865
ENSMUSG00000026566	Mpzl1	D	TRUE	sinusoidal	1.71026	2.95814	TRUE	sinusoidal	2.24658	3.92731
ENSMUSG00000026602	Nphs2	D	TRUE	sinusoidal	2.03929	3.59302	TRUE	sinusoidal	2.07553	3.07283
ENSMUSG00000026669	Mcm10	D	TRUE	sinusoidal	1.63967	10.8667	TRUE	sinusoidal	1.56259	9.42888
ENSMUSG00000026768	Itga8	D	TRUE	sinusoidal	2.48584	7.70101	TRUE	sinusoidal	1.89947	6.67052
ENSMUSG00000026773	Pfkfb3	D	TRUE	sinusoidal	1.66244	11.3565	TRUE	sinusoidal	1.76791	9.28398
ENSMUSG00000026819	Slc25a25	D	TRUE	sigmoid	3.45641	14.025	TRUE	sigmoid	3.36226	14.06
ENSMUSG00000026822	Lcn2	D	TRUE	sigmoid	2.15179	15.59	TRUE	sigmoid	3.00029	15.795
ENSMUSG00000026839	Upp2	D	TRUE	sigmoid	3.9567	10.945	TRUE	sigmoid	2.79444	11.085
ENSMUSG00000026864	Hspa5	D	TRUE	sigmoid	2.0563	15.875	TRUE	sigmoid	2.28284	16.035
ENSMUSG00000026971	Itgb6	D	TRUE	sinusoidal	1.7508	0.818162	TRUE	sinusoidal	2.26663	1.06618
ENSMUSG00000027075	Slc43a1	D	TRUE	sinusoidal	2.39528	10.2944	TRUE	sigmoid	1.89482	14.255
ENSMUSG00000027111	Itga6	D	TRUE	sinusoidal	1.98719	21.7397	TRUE	sinusoidal	2.15768	21.2109
ENSMUSG00000027130	Slc12a6	D	TRUE	sinusoidal	1.85563	13.1569	TRUE	sigmoid	1.75466	14.445
ENSMUSG00000027204	Fbn1	D	TRUE	sinusoidal	1.79952	6.0917	TRUE	sinusoidal	1.81186	4.45427
ENSMUSG00000027230	Creb3l1	D	TRUE	sinusoidal	1.97521	2.47418	TRUE	sinusoidal	2.11183	3.51714
ENSMUSG00000027246	Ell3	D	TRUE	sinusoidal	3.11916	6.27791	TRUE	sigmoid	2.94515	12.475
ENSMUSG00000027346	Gpcpd1	D	TRUE	sigmoid	1.93779	10.74	TRUE	sigmoid	1.53278	11.04
ENSMUSG00000027387	Zc3h8	D	TRUE	sinusoidal	1.58869	19.1895	TRUE	sinusoidal	1.63929	18.8125
ENSMUSG00000027412	Lpin3	D	TRUE	sinusoidal	1.64973	7.30407	TRUE	sigmoid	1.52312	11.305
ENSMUSG00000027513	Pck1	D	TRUE	sinusoidal	2.44677	14.8043	TRUE	sigmoid	2.23589	13.775
ENSMUSG00000027534	Snx16	D	TRUE	sinusoidal	1.50835	18.1534	TRUE	sinusoidal	1.75531	20.2659
ENSMUSG00000027908	Tchhl1	D	TRUE	sinusoidal	2.55844	18.0639	TRUE	sinusoidal	1.90145	17.4228
ENSMUSG00000027955	Fam198b	D	TRUE	sinusoidal	2.49314	4.10671	TRUE	sinusoidal	1.96944	3.4728
ENSMUSG00000027996	Sfrp2	D	TRUE	sinusoidal	1.70268	3.86776	TRUE	sinusoidal	2.63749	5.12645
ENSMUSG00000028001	Fga	D	TRUE	sinusoidal	2.10406	23.0058	TRUE	sinusoidal	2.5298	22.6847
ENSMUSG00000028035	Dnajb4	D	TRUE	sigmoid	2.24456	13.93	TRUE	sinusoidal	2.32815	16.8897
ENSMUSG00000028037	Ifi44	D	TRUE	sinusoidal	1.57447	0.189961	TRUE	sinusoidal	1.69496	23.0492
ENSMUSG00000028039	Efna3	D	TRUE	sinusoidal	2.11353	10.0487	TRUE	sinusoidal	2.21646	10.5367
ENSMUSG00000028150	Rorc	D	TRUE	sigmoid	3.71962	19.585	TRUE	sinusoidal	4.19676	18.8095
ENSMUSG00000028327	1300002K09Rik	D	TRUE	sinusoidal	3.34318	3.09546	TRUE	sinusoidal	2.94087	2.76088
ENSMUSG00000028337	Coro2a	D	TRUE	sigmoid	2.39465	11.97	TRUE	sigmoid	1.94615	11.48
ENSMUSG00000028370	Pappa	D	TRUE	sigmoid	1.58438	15.82	TRUE	sigmoid	1.61523	15.915
ENSMUSG00000028410	Dnaja1	D	TRUE	sigmoid	1.87064	15.375	TRUE	sigmoid	1.70767	15.995
ENSMUSG00000028444	Cntfr	D	TRUE	sinusoidal	1.75881	16.6819	TRUE	sinusoidal	1.85216	16.3611
ENSMUSG00000028480	Glipr2	D	TRUE	sinusoidal	2.98617	0.710907	TRUE	sigmoid	3.42372	5.165
ENSMUSG00000028527	Ak4	D	TRUE	sinusoidal	2.32419	14.4245	TRUE	sinusoidal	1.87449	14.5848
ENSMUSG00000028680	Plk3	D	TRUE	sinusoidal	2.54067	14.5225	TRUE	sinusoidal	2.58112	14.0246
ENSMUSG00000028862	Map3k6	D	TRUE	sinusoidal	2.67443	12.8219	TRUE	sinusoidal	2.03506	12.5031
ENSMUSG00000028909	Ptpru	D	TRUE	sinusoidal	1.942	23.2608	TRUE	sinusoidal	1.93711	0.596429
ENSMUSG00000028919	Arhgef19	D	TRUE	sinusoidal	1.80502	23.9148	TRUE	sinusoidal	2.71033	2.85901
ENSMUSG00000028957	Per3	D	TRUE	sigmoid	4.83888	10.9	TRUE	sigmoid	4.94162	10.86
ENSMUSG00000028976	Slc2a5	D	TRUE	sinusoidal	1.56923	10.3769	TRUE	sinusoidal	1.60292	11.0128
ENSMUSG00000028989	Angptl7	D	TRUE	sinusoidal	2.75286	14.2141	TRUE	sinusoidal	2.2556	14.2446
ENSMUSG00000029022	Miip	D	TRUE	sinusoidal	2.06141	10.3624	TRUE	sigmoid	1.65517	11.615
ENSMUSG00000029074	Ttll10	D	TRUE	sinusoidal	1.77372	10.1049	TRUE	sinusoidal	1.87673	7.85745
ENSMUSG00000029223	Uchl1	D	TRUE	sinusoidal	1.86127	8.92384	TRUE	sinusoidal	1.87743	10.5155
ENSMUSG00000029238	Clock	D	TRUE	sinusoidal	1.62874	22.5261	TRUE	sinusoidal	1.64244	21.5299
ENSMUSG00000029328	Hnrnpdl	D	TRUE	sinusoidal	1.9828	7.12597	TRUE	sigmoid	1.58738	10.97
ENSMUSG00000029333	Rasgef1b	D	TRUE	sigmoid	1.74541	16.06	TRUE	sinusoidal	1.69853	15.4083
ENSMUSG00000029553	Tfec	D	TRUE	sinusoidal	1.91497	20.8739	TRUE	sinusoidal	2.26453	20.5617
ENSMUSG00000029556	Hnf1a	D	TRUE	sinusoidal	1.67696	5.15283	TRUE	sigmoid	1.6819	6.66
ENSMUSG00000029570	Lfng	D	TRUE	sinusoidal	1.6254	13.5695	TRUE	sinusoidal	1.743	11.3844
ENSMUSG00000029581	Fscn1	D	TRUE	sinusoidal	1.78861	7.21829	TRUE	sinusoidal	2.07717	6.13658
ENSMUSG00000029601	Iqcd	D	TRUE	sinusoidal	2.30036	7.09259	TRUE	sinusoidal	1.90955	9.84709
ENSMUSG00000029641	Rasl11a	D	TRUE	sinusoidal	1.75773	0.446962	TRUE	sinusoidal	2.44571	23.6844
ENSMUSG00000029657	Hsph1	D	TRUE	sigmoid	2.17254	15.125	TRUE	sigmoid	1.86461	15.37
ENSMUSG00000029664	Tfpi2	D	TRUE	sinusoidal	1.68026	23.7324	TRUE	sinusoidal	2.0862	22.5005
ENSMUSG00000029675	Eln	D	TRUE	sinusoidal	2.24684	2.93828	TRUE	sinusoidal	2.55421	5.92912
ENSMUSG00000029804	Herc3	D	TRUE	sigmoid	2.59895	11.91	TRUE	sigmoid	1.91282	12.095
ENSMUSG00000029817	Tra2a	D	TRUE	sigmoid	2.11266	14.44	TRUE	sinusoidal	1.89061	18.5354
ENSMUSG00000029925	Tbxas1	D	TRUE	sinusoidal	1.88443	3.93542	TRUE	sinusoidal	1.96232	3.26472
ENSMUSG00000030004	Nat8	D	TRUE	sinusoidal	1.89477	17.2291	TRUE	sigmoid	1.99447	13.985
ENSMUSG00000030031	Kbtbd8	D	TRUE	sinusoidal	1.80431	17.4451	TRUE	sinusoidal	2.05463	19.0333
ENSMUSG00000030055	Rab43	D	TRUE	sinusoidal	1.54709	8.19768	TRUE	sigmoid	1.69421	11.845
ENSMUSG00000030103	Bhlhe40	D	TRUE	sinusoidal	1.75386	13.972	TRUE	sinusoidal	1.76307	13.4455
ENSMUSG00000030170	Wnt5b	D	TRUE	sinusoidal	1.76313	10.6404	TRUE	sigmoid	2.28777	12.395
ENSMUSG00000030200	Bcl2l14	D	TRUE	sinusoidal	1.73751	5.5273	TRUE	sinusoidal	1.70359	4.97696
ENSMUSG00000030222	Rerg	D	TRUE	sinusoidal	1.6195	11.8715	TRUE	sinusoidal	1.56896	7.88481
ENSMUSG00000030255	Sspn	D	TRUE	sinusoidal	1.71939	10.7919	TRUE	sinusoidal	1.88539	9.40704
ENSMUSG00000030256	Bhlhe41	D	TRUE	sinusoidal	4.98437	11.1057	TRUE	sigmoid	3.77805	8.935
ENSMUSG00000030525	Chrna7	D	TRUE	sinusoidal	3.37463	21.2622	TRUE	sinusoidal	2.30245	20.7245
ENSMUSG00000030546	Plin1	D	TRUE	sinusoidal	9.40493	4.56888	TRUE	sinusoidal	21.7281	4.86104
ENSMUSG00000030562	Nox4	D	TRUE	sinusoidal	2.10604	15.3264	TRUE	sinusoidal	1.54418	15.6603
ENSMUSG00000030653	Pde2a	D	TRUE	sinusoidal	1.78719	3.98961	TRUE	sinusoidal	1.7056	4.54994
ENSMUSG00000030711	Sult1a1	D	TRUE	sigmoid	1.74954	15.8	TRUE	sinusoidal	1.74122	16.6637
ENSMUSG00000030762	Aqp8	D	TRUE	sinusoidal	634.622	0.85551	TRUE	sinusoidal	23.4159	0.836112
ENSMUSG00000030795	Fus	D	TRUE	sigmoid	2.14516	10.895	TRUE	sinusoidal	4.38638	7.45549
ENSMUSG00000030895	Hpx	D	TRUE	sigmoid	3.16654	15.435	TRUE	sigmoid	2.90101	3.325
ENSMUSG00000030972	Acsm5	D	TRUE	sigmoid	1.76186	11.795	TRUE	sigmoid	1.58767	11.97
ENSMUSG00000031016	Wee1	D	TRUE	sigmoid	2.93683	13.605	TRUE	sigmoid	2.35314	12.155
ENSMUSG00000031167	Rbm3	D	TRUE	sinusoidal	1.71895	11.8695	TRUE	sinusoidal	1.70818	13.3441
ENSMUSG00000031327	Chic1	D	TRUE	sinusoidal	1.80644	23.5828	TRUE	sinusoidal	1.61997	23.0105
ENSMUSG00000031383	Dusp9	D	TRUE	sigmoid	2.08609	8.035	TRUE	sigmoid	2.14297	8.35
ENSMUSG00000031384	Asb9	D	TRUE	sinusoidal	1.53736	5.00553	TRUE	sinusoidal	1.49876	4.84834
ENSMUSG00000031431	Tsc22d3	D	TRUE	sigmoid	4.11828	14.65	TRUE	sigmoid	3.67745	14.31
ENSMUSG00000031465	Angpt2	D	TRUE	sinusoidal	1.77261	4.12877	TRUE	sinusoidal	2.03883	4.43178
ENSMUSG00000031604	Sc4mol	D	TRUE	sinusoidal	1.65973	22.5329	TRUE	sinusoidal	2.0017	22.3856
ENSMUSG00000031762	Mt2	D	TRUE	sinusoidal	2.96222	7.95052	TRUE	sinusoidal	2.7473	8.43989
ENSMUSG00000031765	Mt1	D	TRUE	sinusoidal	2.45802	8.85873	TRUE	sinusoidal	2.29306	8.61885
ENSMUSG00000031770	Herpud1	D	TRUE	sigmoid	1.6647	15.295	TRUE	sigmoid	1.81232	14.845
ENSMUSG00000031787	Katnb1	D	TRUE	sigmoid	1.72521	10.535	TRUE	sigmoid	1.56946	9.295
ENSMUSG00000031790	Mmp15	D	TRUE	sinusoidal	2.77239	0.932959	TRUE	sinusoidal	2.92678	1.76529
ENSMUSG00000031861	Lpar2	D	TRUE	sinusoidal	1.75783	7.31459	TRUE	sigmoid	1.74387	5.635
ENSMUSG00000032010	Usp2	D	TRUE	sinusoidal	2.18473	13.1325	TRUE	sigmoid	1.99308	10.985
ENSMUSG00000032064	Dixdc1	D	TRUE	sinusoidal	1.65818	5.88292	TRUE	sinusoidal	1.49532	5.83883
ENSMUSG00000032115	Hyou1	D	TRUE	sinusoidal	1.88374	20.0797	TRUE	sinusoidal	1.78033	20.5054
ENSMUSG00000032193	Ldlr	D	TRUE	sinusoidal	1.75498	20.4059	TRUE	sinusoidal	1.7016	20.7879
ENSMUSG00000032363	Adamts7	D	TRUE	sinusoidal	2.92925	3.66517	TRUE	sinusoidal	1.87691	4.0432
ENSMUSG00000032374	Plod2	D	TRUE	sinusoidal	1.62336	0.734286	TRUE	sinusoidal	1.64203	23.0663
ENSMUSG00000032420	Nt5e	D	TRUE	sinusoidal	2.30177	22.2756	TRUE	sinusoidal	2.35962	21.8128
ENSMUSG00000032507	Fbxl2	D	TRUE	sinusoidal	1.57609	8.43716	TRUE	sinusoidal	1.60401	8.23416
ENSMUSG00000032515	Csrnp1	D	TRUE	sinusoidal	1.92896	10.9685	TRUE	sinusoidal	1.66635	10.6002
ENSMUSG00000032564	Cpne4	D	TRUE	sinusoidal	1.58182	19.5394	TRUE	sigmoid	1.8813	19
ENSMUSG00000032565	Nudt16	D	TRUE	sinusoidal	1.81884	7.97039	TRUE	sinusoidal	2.08691	8.44925
ENSMUSG00000032575	Manf	D	TRUE	sigmoid	2.33519	15.62	TRUE	sigmoid	2.40987	15.69
ENSMUSG00000032786	Alas1	D	TRUE	sigmoid	2.03188	13.86	TRUE	sinusoidal	2.04675	14.7183
ENSMUSG00000032902	Slc16a1	D	TRUE	sinusoidal	4.07367	22.947	TRUE	sinusoidal	4.38666	22.7831
ENSMUSG00000033107	Rnf125	D	TRUE	sinusoidal	2.39401	0.721562	TRUE	sinusoidal	1.86712	23.5
ENSMUSG00000033318	Gstt2	D	TRUE	sinusoidal	1.67354	11.6448	TRUE	sinusoidal	1.59282	11.0195
ENSMUSG00000033453	Adamts15	D	TRUE	sinusoidal	1.56657	21.5025	TRUE	sinusoidal	1.49729	23.474
ENSMUSG00000033685	Ucp2	D	TRUE	sinusoidal	1.52228	8.13129	TRUE	sinusoidal	1.75798	9.43557
ENSMUSG00000034613	Ppm1h	D	TRUE	sinusoidal	1.79069	0.433882	TRUE	sinusoidal	2.00274	0.584619
ENSMUSG00000034875	Nudt19	D	TRUE	sinusoidal	1.99884	15.3606	TRUE	sinusoidal	1.9004	16.082
ENSMUSG00000034898	Filip1	D	TRUE	sinusoidal	1.61041	4.24788	TRUE	sinusoidal	1.80444	5.35734
ENSMUSG00000034919	Ttc22	D	TRUE	sinusoidal	2.54128	1.23338	TRUE	sinusoidal	1.80484	2.37761
ENSMUSG00000034930	Rtkn	D	TRUE	sinusoidal	2.02316	14.5862	TRUE	sinusoidal	1.95405	13.8313
ENSMUSG00000034947	Tmem106a	D	TRUE	sinusoidal	1.52817	8.96335	TRUE	sigmoid	1.61534	12.23
ENSMUSG00000035064	Eef2k	D	TRUE	sigmoid	1.93578	11.265	TRUE	sinusoidal	1.70126	9.11309
ENSMUSG00000035105	Egln3	D	TRUE	sinusoidal	1.51883	8.34439	TRUE	sinusoidal	1.55179	6.74781
ENSMUSG00000035121	Neil2	D	TRUE	sigmoid	2.46891	10	TRUE	sigmoid	2.97629	9.675
ENSMUSG00000035486	Plk5	D	TRUE	sinusoidal	2.06195	16.2549	TRUE	sigmoid	1.79484	13.51
ENSMUSG00000035509	Fbxl21	D	TRUE	sigmoid	2.28564	11.625	TRUE	sinusoidal	1.57593	8.70345
ENSMUSG00000035671	Zswim4	D	TRUE	sinusoidal	1.85674	6.19683	TRUE	sinusoidal	1.56614	6.64537
ENSMUSG00000035824	Tk2	D	TRUE	sinusoidal	1.57169	7.05548	TRUE	sigmoid	1.53677	10
ENSMUSG00000035910	Dcdc2a	D	TRUE	sinusoidal	2.50149	1.7194	TRUE	sinusoidal	2.37342	2.00674
ENSMUSG00000036181	Hist1h1c	D	TRUE	sinusoidal	2.25433	6.22523	TRUE	sinusoidal	2.21317	7.24564
ENSMUSG00000036218	Pdzrn4	D	TRUE	sinusoidal	5.22249	22.512	TRUE	sinusoidal	2.94537	22.4867
ENSMUSG00000036356	Csgalnact1	D	TRUE	sinusoidal	1.77246	1.6467	TRUE	sinusoidal	1.66339	0.201322
ENSMUSG00000036368	Rmdn2	D	TRUE	sinusoidal	1.57174	23.674	TRUE	sinusoidal	1.60972	22.6879
ENSMUSG00000036452	Arhgap26	D	TRUE	sinusoidal	2.17612	0.700668	TRUE	sinusoidal	2.06689	0.75197
ENSMUSG00000036641	Ccdc148	D	TRUE	sigmoid	2.39776	12.89	TRUE	sinusoidal	1.65428	9.83746
ENSMUSG00000036752	Tubb4b	D	TRUE	sinusoidal	1.51182	20.8089	TRUE	sinusoidal	1.49998	20.0809
ENSMUSG00000036833	Pnpla7	D	TRUE	sinusoidal	1.80198	10.3342	TRUE	sinusoidal	1.70914	9.25239
ENSMUSG00000036853	Mcoln3	D	TRUE	sigmoid	1.57959	16	TRUE	sigmoid	1.54303	17.65
ENSMUSG00000037003	Tenc1	D	TRUE	sinusoidal	1.92785	9.50988	TRUE	sinusoidal	1.90222	9.61444
ENSMUSG00000037035	Inhbb	D	TRUE	sinusoidal	2.96243	5.83664	TRUE	sinusoidal	3.89684	5.53829
ENSMUSG00000037211	Spry1	D	TRUE	sinusoidal	1.82701	1.59149	TRUE	sinusoidal	1.56113	2.51781
ENSMUSG00000037221	Mospd3	D	TRUE	sigmoid	1.63485	7.615	TRUE	sinusoidal	2.36199	6.00211
ENSMUSG00000037254	Itih2	D	TRUE	sigmoid	1.62358	13.89	TRUE	sigmoid	1.52895	12.455
ENSMUSG00000037321	Tap1	D	TRUE	sinusoidal	1.61937	6.3689	TRUE	sinusoidal	1.68841	6.80398
ENSMUSG00000037411	Serpine1	D	TRUE	sigmoid	3.41117	14.1	TRUE	sinusoidal	3.16625	11.4521
ENSMUSG00000037624	Kcnk2	D	TRUE	sinusoidal	2.63382	4.63038	TRUE	sinusoidal	2.30749	4.57831
ENSMUSG00000037660	Gdf7	D	TRUE	sinusoidal	1.57872	3.79799	TRUE	sinusoidal	1.51324	7.73711
ENSMUSG00000037697	Ddhd1	D	TRUE	sinusoidal	1.79398	22.917	TRUE	sinusoidal	1.62175	23.1626
ENSMUSG00000037780	Mbl1	D	TRUE	sinusoidal	1.49855	22.1457	TRUE	sinusoidal	1.55784	21.2696
ENSMUSG00000037847	Nmrk1	D	TRUE	sinusoidal	1.55379	13.5088	TRUE	sigmoid	1.64496	10.235
ENSMUSG00000037892	Pcdh18	D	TRUE	sinusoidal	1.55631	1.91453	TRUE	sinusoidal	1.67941	23.9486
ENSMUSG00000037907	Ankrd13b	D	TRUE	sinusoidal	2.12582	3.1011	TRUE	sigmoid	1.79984	7.82
ENSMUSG00000037921	Ddx60	D	TRUE	sinusoidal	2.3041	6.86087	TRUE	sinusoidal	1.68728	4.65467
ENSMUSG00000038393	Txnip	D	TRUE	sinusoidal	1.78003	4.91086	TRUE	sinusoidal	1.77171	4.80586
ENSMUSG00000038463	Olfml2b	D	TRUE	sinusoidal	2.46709	0.993881	TRUE	sinusoidal	2.50623	1.08269
ENSMUSG00000038526	Car14	D	TRUE	sinusoidal	1.85577	11.9347	TRUE	sinusoidal	1.67211	12.5419
ENSMUSG00000038530	Rgs4	D	TRUE	sigmoid	2.08211	15.36	TRUE	sigmoid	2.49088	15.94
ENSMUSG00000038541	Srd5a2	D	TRUE	sinusoidal	1.87927	21.1597	TRUE	sinusoidal	1.92741	21.2927
ENSMUSG00000038550	Gm129	D	TRUE	sigmoid	25.3264	9.685	TRUE	sigmoid	24.0715	10.03
ENSMUSG00000038567	Cyp24a1	D	TRUE	sigmoid	4.29041	5.335	TRUE	sigmoid	5.06162	5.63
ENSMUSG00000038776	Ephx1	D	TRUE	sinusoidal	1.74034	11.8524	TRUE	sinusoidal	1.73465	12.488
ENSMUSG00000038811	Gngt2	D	TRUE	sinusoidal	2.11639	2.48263	TRUE	sinusoidal	1.61846	21.7579
ENSMUSG00000039058	Ak5	D	TRUE	sinusoidal	1.56301	5.33773	TRUE	sinusoidal	1.56226	3.95101
ENSMUSG00000039096	Rsad1	D	TRUE	sigmoid	1.70772	7.885	TRUE	sigmoid	1.9418	6.645
ENSMUSG00000039110	Mycbpap	D	TRUE	sinusoidal	1.69691	5.01528	TRUE	sinusoidal	1.67607	4.37068
ENSMUSG00000039157	Fam102a	D	TRUE	sinusoidal	1.57541	13.9805	TRUE	sigmoid	1.92142	13.75
ENSMUSG00000039328	Rnf122	D	TRUE	sigmoid	1.87936	3.585	TRUE	sinusoidal	1.73885	2.03177
ENSMUSG00000039377	Hlx	D	TRUE	sinusoidal	1.78957	3.753	TRUE	sigmoid	1.95027	6.455
ENSMUSG00000039405	Prss23	D	TRUE	sinusoidal	1.98253	2.74815	TRUE	sinusoidal	1.54263	1.84471
ENSMUSG00000039632	Ccdc151	D	TRUE	sinusoidal	1.77262	2.86312	TRUE	sinusoidal	1.66893	5.12893
ENSMUSG00000039633	Lonrf1	D	TRUE	sinusoidal	2.30863	12.7354	TRUE	sinusoidal	2.03349	12.3759
ENSMUSG00000039646	Vasn	D	TRUE	sigmoid	1.68019	14.22	TRUE	sigmoid	1.7188	14.545
ENSMUSG00000039706	Ldb2	D	TRUE	sinusoidal	1.51371	4.88916	TRUE	sinusoidal	1.65272	5.17322
ENSMUSG00000039710	Slc7a12	D	TRUE	sigmoid	2.49518	15.965	TRUE	sigmoid	3.33555	16.05
ENSMUSG00000039982	Dtx4	D	TRUE	sinusoidal	3.03656	0.575806	TRUE	sinusoidal	2.51501	1.11715
ENSMUSG00000040093	Bmf	D	TRUE	sinusoidal	1.86185	8.04166	TRUE	sinusoidal	1.72448	9.10228
ENSMUSG00000040128	Pnrc1	D	TRUE	sinusoidal	1.76409	22.2147	TRUE	sinusoidal	1.50363	21.4287
ENSMUSG00000040272	Accs	D	TRUE	sinusoidal	2.46099	9.08477	TRUE	sigmoid	2.03971	11.81
ENSMUSG00000040557	Wbscr27	D	TRUE	sinusoidal	1.4952	8.2209	TRUE	sinusoidal	1.67662	7.20819
ENSMUSG00000040606	Kazn	D	TRUE	sigmoid	1.66657	7.475	TRUE	sigmoid	1.73361	6.75
ENSMUSG00000040675	Mthfd1l	D	TRUE	sigmoid	2.75997	12.87	TRUE	sigmoid	2.25992	11.93
ENSMUSG00000040740	Slc25a34	D	TRUE	sinusoidal	1.5404	12.7287	TRUE	sinusoidal	1.54707	11.8566
ENSMUSG00000040938	Slc16a11	D	TRUE	sinusoidal	1.73921	14.0012	TRUE	sinusoidal	1.5377	11.1588
ENSMUSG00000040964	Arhgef10l	D	TRUE	sinusoidal	1.86092	0.42073	TRUE	sinusoidal	1.74385	1.05794
ENSMUSG00000040998	Npnt	D	TRUE	sinusoidal	1.89645	22.9978	TRUE	sinusoidal	1.97764	0.440793
ENSMUSG00000041025	Iffo2	D	TRUE	sinusoidal	1.55846	1.81007	TRUE	sinusoidal	1.69755	2.05662
ENSMUSG00000041073	Nacad	D	TRUE	sinusoidal	2.39778	2.46029	TRUE	sinusoidal	1.5216	1.77434
ENSMUSG00000041132	N4bp2l1	D	TRUE	sinusoidal	2.24799	5.592	TRUE	sinusoidal	1.66271	6.91463
ENSMUSG00000041323	Ak7	D	TRUE	sinusoidal	1.64431	11.7662	TRUE	sinusoidal	1.74459	12.565
ENSMUSG00000041362	4930506M07Rik	D	TRUE	sigmoid	1.62316	23.835	TRUE	sinusoidal	1.69169	1.61598
ENSMUSG00000041459	Tardbp	D	TRUE	sinusoidal	1.89692	19.9917	TRUE	sinusoidal	1.63952	21.371
ENSMUSG00000041605	5730559C18Rik	D	TRUE	sinusoidal	2.04211	20.5027	TRUE	sinusoidal	2.02938	19.9033
ENSMUSG00000041660	Bbox1	D	TRUE	sinusoidal	3.21764	11.4471	TRUE	sinusoidal	2.73445	12.6697
ENSMUSG00000041774	Ydjc	D	TRUE	sinusoidal	1.61494	9.98561	TRUE	sinusoidal	2.20775	8.22463
ENSMUSG00000041777	Cir1	D	TRUE	sinusoidal	1.56611	5.02973	TRUE	sinusoidal	1.87539	6.20406
ENSMUSG00000041895	Wipi1	D	TRUE	sinusoidal	1.79242	7.7544	TRUE	sinusoidal	1.89837	7.49834
ENSMUSG00000041920	Slc16a6	D	TRUE	sigmoid	2.09703	18.255	TRUE	sinusoidal	2.26646	21.3571
ENSMUSG00000042064	Myo3b	D	TRUE	sigmoid	1.59152	14.425	TRUE	sigmoid	1.54706	15.085
ENSMUSG00000042115	Klhdc8a	D	TRUE	sinusoidal	1.53979	23.8609	TRUE	sinusoidal	1.50469	0.364257
ENSMUSG00000042156	Dzip1	D	TRUE	sinusoidal	2.14215	6.97404	TRUE	sinusoidal	1.68263	11.5588
ENSMUSG00000042179	Pnliprp1	D	TRUE	sinusoidal	2.69311	10.3596	TRUE	sinusoidal	1.96682	11.0601
ENSMUSG00000042406	Atf4	D	TRUE	sigmoid	1.99837	14.87	TRUE	sinusoidal	1.65935	17.9317
ENSMUSG00000042417	Ccno	D	TRUE	sinusoidal	2.64088	6.5911	TRUE	sinusoidal	2.77859	7.70325
ENSMUSG00000042487	Leo1	D	TRUE	sinusoidal	2.22895	22.4936	TRUE	sinusoidal	2.33137	22.0168
ENSMUSG00000042745	Id1	D	TRUE	sinusoidal	1.79504	12.7661	TRUE	sinusoidal	1.93919	12.3031
ENSMUSG00000042787	Exog	D	TRUE	sinusoidal	2.16197	19.0551	TRUE	sinusoidal	1.69354	19.9294
ENSMUSG00000042851	Zc3h6	D	TRUE	sigmoid	3.28543	10.165	TRUE	sigmoid	2.12213	9.63
ENSMUSG00000042942	Greb1l	D	TRUE	sinusoidal	1.71186	0.924094	TRUE	sinusoidal	1.53431	23.8671
ENSMUSG00000043251	Exoc3l	D	TRUE	sinusoidal	2.0982	5.92272	TRUE	sigmoid	1.90847	6.265
ENSMUSG00000043496	Tril	D	TRUE	sinusoidal	1.95496	1.85568	TRUE	sinusoidal	2.09417	1.20648
ENSMUSG00000043719	Col6a6	D	TRUE	sinusoidal	3.05385	3.10503	TRUE	sinusoidal	3.26492	3.03408
ENSMUSG00000044033	Ccdc141	D	TRUE	sinusoidal	1.57623	20.6558	TRUE	sinusoidal	1.74995	21.3248
ENSMUSG00000044254	Pcsk9	D	TRUE	sinusoidal	4.50297	20.3736	TRUE	sinusoidal	2.68031	20.4951
ENSMUSG00000044337	Ackr3	D	TRUE	sinusoidal	2.42055	19.5121	TRUE	sinusoidal	2.20665	18.0319
ENSMUSG00000044338	Aplnr	D	TRUE	sinusoidal	2.09279	3.27472	TRUE	sinusoidal	1.81247	5.43402
ENSMUSG00000044468	Fam46c	D	TRUE	sigmoid	2.44668	15.72	TRUE	sigmoid	2.02444	15.83
ENSMUSG00000044748	Defb1	D	TRUE	sinusoidal	1.61541	1.70798	TRUE	sinusoidal	1.60788	19.3855
ENSMUSG00000045064	Zc2hc1c	D	TRUE	sinusoidal	1.55466	22.3716	TRUE	sinusoidal	1.69495	21.418
ENSMUSG00000045193	Cirbp	D	TRUE	sigmoid	2.74046	10.265	TRUE	sigmoid	2.81182	10.155
ENSMUSG00000045215	Asxl3	D	TRUE	sinusoidal	2.86304	0.798693	TRUE	sinusoidal	1.96314	0.327008
ENSMUSG00000045259	Klhdc9	D	TRUE	sinusoidal	2.26423	8.49902	TRUE	sinusoidal	2.3906	9.24664
ENSMUSG00000045294	Insig1	D	TRUE	sinusoidal	1.64064	21.1472	TRUE	sigmoid	1.6541	20.34
ENSMUSG00000045441	Gprin3	D	TRUE	sinusoidal	2.52092	6.8062	TRUE	sinusoidal	2.00879	6.80188
ENSMUSG00000045662	Henmt1	D	TRUE	sinusoidal	2.18521	4.43297	TRUE	sinusoidal	2.21041	2.86982
ENSMUSG00000045672	Col27a1	D	TRUE	sinusoidal	2.44378	14.3206	TRUE	sinusoidal	2.5492	14.514
ENSMUSG00000046223	Plaur	D	TRUE	sinusoidal	1.77394	10.7676	TRUE	sinusoidal	1.6214	11.6696
ENSMUSG00000046491	C1qtnf2	D	TRUE	sinusoidal	1.90223	2.84571	TRUE	sinusoidal	1.65641	1.16944
ENSMUSG00000046605	B3gntl1	D	TRUE	sinusoidal	1.82157	8.75736	TRUE	sigmoid	1.63092	6.985
ENSMUSG00000046667	Rbm12b1	D	TRUE	sinusoidal	2.30537	17.4804	TRUE	sinusoidal	1.69334	18.896
ENSMUSG00000046694	Fam46b	D	TRUE	sinusoidal	1.80434	11.3144	TRUE	sinusoidal	1.79731	10.9151
ENSMUSG00000046818	Ddit4l	D	TRUE	sinusoidal	1.64579	22.3168	TRUE	sinusoidal	1.73808	0.257653
ENSMUSG00000047330	Kcne4	D	TRUE	sinusoidal	2.54013	16.1043	TRUE	sinusoidal	1.79921	15.6482
ENSMUSG00000047497	Adamts12	D	TRUE	sinusoidal	2.20671	5.69822	TRUE	sinusoidal	1.89984	5.67057
ENSMUSG00000047507	Baiap3	D	TRUE	sinusoidal	1.69122	10.1198	TRUE	sigmoid	1.89882	12.305
ENSMUSG00000047528	Als2cr12	D	TRUE	sigmoid	2.90229	11.76	TRUE	sinusoidal	3.18389	8.93525
ENSMUSG00000047669	Msl3l2	D	TRUE	sinusoidal	2.87256	4.02967	TRUE	sinusoidal	2.22914	4.84634
ENSMUSG00000047986	Palm3	D	TRUE	sinusoidal	3.77731	23.8762	TRUE	sinusoidal	3.32955	0.816553
ENSMUSG00000048078	Tenm4	D	TRUE	sinusoidal	1.55207	10.0438	TRUE	sinusoidal	1.61121	8.85534
ENSMUSG00000048373	Fgfbp1	D	TRUE	sinusoidal	1.58724	2.8507	TRUE	sinusoidal	1.61386	1.61957
ENSMUSG00000048489	8430408G22Rik	D	TRUE	sinusoidal	5.56448	4.72907	TRUE	sinusoidal	6.73254	4.67775
ENSMUSG00000048503	Tmem136	D	TRUE	sinusoidal	1.73723	3.80261	TRUE	sinusoidal	1.93134	4.30123
ENSMUSG00000048546	Tob2	D	TRUE	sinusoidal	1.59667	14.5031	TRUE	sigmoid	1.60707	12.8
ENSMUSG00000048911	Rnf24	D	TRUE	sinusoidal	2.10764	10.2025	TRUE	sigmoid	2.64049	10.135
ENSMUSG00000048997	Atxn7l2	D	TRUE	sigmoid	1.54651	5.39	TRUE	sinusoidal	1.89952	13.1073
ENSMUSG00000049511	Htr1b	D	TRUE	sigmoid	2.35105	19.255	TRUE	sigmoid	3.33396	16.01
ENSMUSG00000049670	Morn4	D	TRUE	sinusoidal	2.46145	7.76379	TRUE	sinusoidal	2.28642	6.00993
ENSMUSG00000049690	Nckap5	D	TRUE	sinusoidal	2.28549	1.94989	TRUE	sigmoid	1.94573	1.305
ENSMUSG00000050014	Apol10b	D	TRUE	sigmoid	2.50932	6.09	TRUE	sinusoidal	2.42562	5.0487
ENSMUSG00000050103	Agmo	D	TRUE	sinusoidal	1.7129	15.2248	TRUE	sinusoidal	1.86423	17.0128
ENSMUSG00000050164	Mchr1	D	TRUE	sinusoidal	4.24615	11.0547	TRUE	sinusoidal	3.68219	13.1643
ENSMUSG00000050270	Tmem220	D	TRUE	sigmoid	1.56426	12.215	TRUE	sinusoidal	2.03907	8.08777
ENSMUSG00000050315	Synpo2	D	TRUE	sinusoidal	1.95802	4.87415	TRUE	sinusoidal	1.59762	4.14531
ENSMUSG00000050395	Tnfsf15	D	TRUE	sigmoid	1.91721	4.315	TRUE	sigmoid	1.84265	7.56
ENSMUSG00000050714	Zbtb26	D	TRUE	sinusoidal	1.5236	18.9917	TRUE	sinusoidal	1.66624	19.0075
ENSMUSG00000050777	Tmem37	D	TRUE	sigmoid	1.76443	16.4	TRUE	sinusoidal	1.66294	18.7205
ENSMUSG00000051262	Cml3	D	TRUE	sigmoid	3.01416	16.04	TRUE	sigmoid	2.26683	17.06
ENSMUSG00000051627	Hist1h1e	D	TRUE	sigmoid	2.3012	7.265	TRUE	sinusoidal	2.13592	6.6308
ENSMUSG00000051735	Rinl	D	TRUE	sinusoidal	2.2063	0.784369	TRUE	sinusoidal	1.65741	0.676878
ENSMUSG00000052040	Klf13	D	TRUE	sinusoidal	1.70342	9.53972	TRUE	sinusoidal	2.14252	9.79201
ENSMUSG00000052137	Rbm12b2	D	TRUE	sinusoidal	1.66027	16.7524	TRUE	sinusoidal	1.69029	18.5597
ENSMUSG00000052396	Mogat2	D	TRUE	sinusoidal	1.70303	13.9129	TRUE	sinusoidal	2.07858	13.5582
ENSMUSG00000052512	Nav2	D	TRUE	sinusoidal	1.85951	22.8624	TRUE	sinusoidal	1.86513	0.272753
ENSMUSG00000052565	Hist1h1d	D	TRUE	sinusoidal	2.25943	4.87608	TRUE	sinusoidal	1.83508	5.41544
ENSMUSG00000052595	A1cf	D	TRUE	sinusoidal	1.65289	22.8126	TRUE	sinusoidal	1.61457	23.1842
ENSMUSG00000052837	Junb	D	TRUE	sinusoidal	1.82753	6.01038	TRUE	sinusoidal	1.77119	8.72783
ENSMUSG00000053279	Aldh1a1	D	TRUE	sigmoid	2.58541	15.99	TRUE	sigmoid	1.99598	16.09
ENSMUSG00000053846	Lipg	D	TRUE	sigmoid	2.05836	12.925	TRUE	sinusoidal	2.3873	16.7186
ENSMUSG00000055065	Ddx17	D	TRUE	sinusoidal	1.9457	20.3553	TRUE	sinusoidal	1.54572	22.1499
ENSMUSG00000055116	Arntl	D	TRUE	sinusoidal	40.2516	22.7048	TRUE	sinusoidal	28.6148	22.5587
ENSMUSG00000055531	Cpsf6	D	TRUE	sinusoidal	1.72937	18.5768	TRUE	sinusoidal	1.5266	18.1594
ENSMUSG00000055629	B4galnt4	D	TRUE	sinusoidal	6.01973	6.25595	TRUE	sinusoidal	3.0316	7.41641
ENSMUSG00000055866	Per2	D	TRUE	sinusoidal	10.5166	14.7256	TRUE	sinusoidal	10.8004	14.5438
ENSMUSG00000056025	Clca1	D	TRUE	sigmoid	1.58626	15.625	TRUE	sigmoid	1.88034	16.03
ENSMUSG00000056035	Cyp3a11	D	TRUE	sigmoid	3.72122	12.64	TRUE	sinusoidal	5.99913	0.920183
ENSMUSG00000056071	S100a9	D	TRUE	sigmoid	9.74727	15.875	TRUE	sigmoid	9.16471	15.975
ENSMUSG00000056749	Nfil3	D	TRUE	sinusoidal	8.88079	21.3117	TRUE	sinusoidal	8.81465	21.6309
ENSMUSG00000056888	Glipr1	D	TRUE	sinusoidal	1.62858	0.931766	TRUE	sigmoid	1.77696	17.675
ENSMUSG00000056973	Ces1d	D	TRUE	sinusoidal	1.66306	17.3842	TRUE	sinusoidal	1.80644	17.5061
ENSMUSG00000057060	Slc35f3	D	TRUE	sinusoidal	1.81309	6.49255	TRUE	sinusoidal	1.98987	5.91124
ENSMUSG00000057894	Zfp329	D	TRUE	sinusoidal	1.58227	17.3765	TRUE	sinusoidal	1.50936	21.3866
ENSMUSG00000058258	Idi1	D	TRUE	sinusoidal	1.88038	2.53099	TRUE	sinusoidal	1.98704	1.25523
ENSMUSG00000058620	Adra2b	D	TRUE	sinusoidal	1.78429	16.8425	TRUE	sinusoidal	1.77675	15.5024
ENSMUSG00000058672	Tubb2a	D	TRUE	sinusoidal	2.12093	20.2262	TRUE	sinusoidal	1.887	20.8241
ENSMUSG00000058740	Kcnt1	D	TRUE	sinusoidal	1.64183	11.7984	TRUE	sinusoidal	1.63754	9.68932
ENSMUSG00000058756	Thra	D	TRUE	sinusoidal	1.84588	2.87267	TRUE	sinusoidal	1.60405	3.31934
ENSMUSG00000058806	Col13a1	D	TRUE	sigmoid	2.66133	16.27	TRUE	sigmoid	1.84266	21.18
ENSMUSG00000059743	Fdps	D	TRUE	sinusoidal	1.76021	22.9088	TRUE	sinusoidal	1.86253	22.7119
ENSMUSG00000059824	Dbp	D	TRUE	sigmoid	17.4257	9.16	TRUE	sigmoid	19.7656	9.525
ENSMUSG00000059895	Ptp4a3	D	TRUE	sinusoidal	2.37492	3.87243	TRUE	sinusoidal	1.77235	7.31987
ENSMUSG00000059908	Mug1	D	TRUE	sigmoid	3.47283	12.8	TRUE	sinusoidal	3.25333	1.33037
ENSMUSG00000059921	Unc5c	D	TRUE	sinusoidal	1.7449	21.0378	TRUE	sinusoidal	1.67257	21.3054
ENSMUSG00000059970	Hspa2	D	TRUE	sigmoid	1.69837	15.585	TRUE	sinusoidal	1.73945	11.7164
ENSMUSG00000060126	Tpt1	D	TRUE	sinusoidal	1.60038	17.5916	TRUE	sigmoid	1.71562	0.8
ENSMUSG00000060176	Kif27	D	TRUE	sinusoidal	2.01009	21.9982	TRUE	sinusoidal	1.9026	22.2587
ENSMUSG00000060317	Acnat2	D	TRUE	sigmoid	2.32491	16.215	TRUE	sigmoid	2.42073	16.285
ENSMUSG00000060550	H2-Q7	D	TRUE	sinusoidal	1.85665	5.67577	TRUE	sinusoidal	2.66778	7.38707
ENSMUSG00000060733	Ipmk	D	TRUE	sinusoidal	1.52467	2.97912	TRUE	sinusoidal	1.5593	2.12337
ENSMUSG00000060862	Zbtb40	D	TRUE	sinusoidal	1.61968	18.2584	TRUE	sigmoid	1.56439	14.83
ENSMUSG00000060985	Tdrd5	D	TRUE	sinusoidal	1.89355	2.21688	TRUE	sinusoidal	1.61161	0.973404
ENSMUSG00000061393	Acvr2b	D	TRUE	sinusoidal	2.1307	9.035	TRUE	sinusoidal	1.95377	7.34147
ENSMUSG00000061780	Cfd	D	TRUE	sinusoidal	4.57846	4.59915	TRUE	sinusoidal	7.54211	4.64582
ENSMUSG00000062410	Hsd3b3	D	TRUE	sinusoidal	1.78027	15.9745	TRUE	sinusoidal	1.61038	14.6908
ENSMUSG00000062991	Nrg1	D	TRUE	sinusoidal	1.75635	0.296121	TRUE	sinusoidal	1.66507	23.6032
ENSMUSG00000063063	Ctnna2	D	TRUE	sigmoid	2.58068	13.485	TRUE	sigmoid	2.69789	10.66
ENSMUSG00000063146	Clip2	D	TRUE	sinusoidal	1.63889	0.796895	TRUE	sigmoid	1.56704	5.42
ENSMUSG00000063268	Parp10	D	TRUE	sinusoidal	1.53557	8.17073	TRUE	sinusoidal	1.77761	7.71316
ENSMUSG00000063446	E130309F12Rik	D	TRUE	sinusoidal	2.79222	3.23779	TRUE	sinusoidal	2.46206	2.10979
ENSMUSG00000063849	Ppcdc	D	TRUE	sinusoidal	1.85821	17.5751	TRUE	sinusoidal	1.77959	14.7565
ENSMUSG00000064141	Zfp69	D	TRUE	sinusoidal	2.57337	6.26722	TRUE	sinusoidal	1.73885	7.68006
ENSMUSG00000064254	Ethe1	D	TRUE	sigmoid	2.26621	1.74	TRUE	sinusoidal	2.08445	1.2545
ENSMUSG00000066595	Mfsd7b	D	TRUE	sigmoid	1.50655	14.445	TRUE	sinusoidal	1.53773	16.9551
ENSMUSG00000066687	Zbtb16	D	TRUE	sigmoid	3.29699	12.685	TRUE	sigmoid	3.36558	12.895
ENSMUSG00000068735	Trp53i11	D	TRUE	sinusoidal	1.62916	5.3455	TRUE	sinusoidal	1.64602	5.15847
ENSMUSG00000068742	Cry2	D	TRUE	sigmoid	2.18443	14.25	TRUE	sinusoidal	2.03398	13.2048
ENSMUSG00000068876	Cgn	D	TRUE	sinusoidal	1.79391	1.30666	TRUE	sinusoidal	1.85166	3.52713
ENSMUSG00000069662	Marcks	D	TRUE	sinusoidal	1.82618	2.93589	TRUE	sinusoidal	1.70977	4.76846
ENSMUSG00000069917	Hba-a2	D	TRUE	sigmoid	3.47602	15.79	TRUE	sigmoid	3.11736	15.725
ENSMUSG00000070337	Gpr179	D	TRUE	sinusoidal	4.3445	6.06158	TRUE	sinusoidal	2.36529	5.59855
ENSMUSG00000070348	Ccnd1	D	TRUE	sinusoidal	1.73217	12.4691	TRUE	sinusoidal	1.77001	10.8363
ENSMUSG00000070644	Etnk2	D	TRUE	sinusoidal	2.07469	9.89514	TRUE	sinusoidal	1.57044	13.2087
ENSMUSG00000070705	Eid2b	D	TRUE	sigmoid	1.73	6.6	TRUE	sinusoidal	1.71085	8.36647
ENSMUSG00000070720	Tmem200b	D	TRUE	sigmoid	2.65474	13.885	TRUE	sinusoidal	1.51305	14.6778
ENSMUSG00000070806	Zmynd12	D	TRUE	sinusoidal	1.96608	9.67955	TRUE	sinusoidal	1.9852	10.8245
ENSMUSG00000070873	Lilra5	D	TRUE	sinusoidal	1.58948	19.5728	TRUE	sinusoidal	1.55753	22.4706
ENSMUSG00000070985	Acnat1	D	TRUE	sinusoidal	1.53697	23.5569	TRUE	sinusoidal	1.49543	23.8453
ENSMUSG00000071178	Serpina1b	D	TRUE	sigmoid	1.96512	15.63	TRUE	sigmoid	2.24553	15.5
ENSMUSG00000071369	Map3k5	D	TRUE	sinusoidal	1.53667	21.6603	TRUE	sigmoid	1.57881	22.29
ENSMUSG00000071551	Akr1c19	D	TRUE	sigmoid	1.62157	15.83	TRUE	sinusoidal	1.84703	16.1088
ENSMUSG00000071633	Gm4952	D	TRUE	sinusoidal	1.9434	0.813988	TRUE	sinusoidal	1.9789	22.4214
ENSMUSG00000073409	H2-Q6	D	TRUE	sinusoidal	1.67619	6.59901	TRUE	sinusoidal	2.57725	7.04478
ENSMUSG00000073530	Pappa2	D	TRUE	sigmoid	2.66352	15.795	TRUE	sigmoid	2.27267	15.765
ENSMUSG00000073755	5730409E04Rik	D	TRUE	sinusoidal	1.86176	4.16816	TRUE	sinusoidal	1.79089	4.50115
ENSMUSG00000073758	Sh3d21	D	TRUE	sinusoidal	1.52205	7.72767	TRUE	sinusoidal	1.69171	10.0158
ENSMUSG00000074063	Osgin1	D	TRUE	sinusoidal	1.98956	16.5634	TRUE	sigmoid	2.29542	14.515
ENSMUSG00000074217	2210011C24Rik	D	TRUE	sinusoidal	2.26886	0.606935	TRUE	sinusoidal	2.15364	1.22757
ENSMUSG00000074575	Kcng1	D	TRUE	sinusoidal	1.63977	8.20915	TRUE	sinusoidal	3.09376	8.16486
ENSMUSG00000074676	Foxs1	D	TRUE	sinusoidal	4.13419	23.8649	TRUE	sinusoidal	3.54977	0.0198757
ENSMUSG00000074794	Arrdc3	D	TRUE	sinusoidal	1.74464	21.958	TRUE	sinusoidal	2.02554	21.7791
ENSMUSG00000074923	Pak6	D	TRUE	sigmoid	1.51988	15.335	TRUE	sigmoid	1.50509	15.205
ENSMUSG00000075012	Fjx1	D	TRUE	sinusoidal	1.6594	1.75728	TRUE	sinusoidal	1.74574	0.363166
ENSMUSG00000075232	Amd1	D	TRUE	sinusoidal	1.78903	17.8084	TRUE	sinusoidal	1.57625	18.9605
ENSMUSG00000075590	Nrbp2	D	TRUE	sigmoid	1.87566	15.41	TRUE	sinusoidal	1.56395	15.0037
ENSMUSG00000078487	Ankrd65	D	TRUE	sinusoidal	1.69945	6.31669	TRUE	sinusoidal	1.75805	7.04128
ENSMUSG00000078532	Nkain1	D	TRUE	sinusoidal	2.52048	14.1946	TRUE	sigmoid	1.84944	11.49
ENSMUSG00000078650	G6pc	D	TRUE	sinusoidal	1.64073	20.4653	TRUE	sinusoidal	1.79926	19.9238
ENSMUSG00000078762	Haus5	D	TRUE	sinusoidal	1.70013	7.90586	TRUE	sinusoidal	1.57703	7.71071
ENSMUSG00000079018	Ly6c1	D	TRUE	sigmoid	1.57615	20.575	TRUE	sinusoidal	1.61617	18.1397
ENSMUSG00000079037	Prnp	D	TRUE	sinusoidal	1.62201	14.8016	TRUE	sinusoidal	2.39334	14.1293
ENSMUSG00000079105	C7	D	TRUE	sigmoid	1.81791	15.565	TRUE	sigmoid	1.93401	15.83
ENSMUSG00000079494	Cml5	D	TRUE	sigmoid	3.73908	15.615	TRUE	sigmoid	4.23327	15.445
ENSMUSG00000089774	Slc5a3	D	TRUE	sigmoid	1.73088	16.075	TRUE	sigmoid	1.64224	15.645
ENSMUSG00000090877	Hspa1b	D	TRUE	sigmoid	5.54216	15.005	TRUE	sigmoid	4.86465	14.66
ENSMUSG00000091971	Hspa1a	D	TRUE	sigmoid	5.84182	14.32	TRUE	sigmoid	4.00622	14.56
ENSMUSG00000091972	Tmem207	D	TRUE	sigmoid	2.7382	15.84	TRUE	sigmoid	2.42248	17.34
ENSMUSG00000095098	Ccdc85b	D	TRUE	sinusoidal	1.68107	8.15409	TRUE	sinusoidal	2.31494	10.0984
ENSMUSG00000095930	Nim1	D	TRUE	sinusoidal	2.7451	5.33437	TRUE	sinusoidal	2.08507	5.80422
