# Supplementary material for: Translational contributions to tissue specificity in rhythmic and constitutive gene expression
Source: Genome Biol. 2017 Jun 16;18:116. doi: 10.1186/s13059-017-1222-2 (PMC5473967; doi:10.1186/s13059-017-1222-2)
Supplement: Supplementary file 5 — Rhythmicity parameters of 178 common rhythmic genes. This file contains the outcome of the rhythmicity analyses in kidney and liver for the 178 commonly rhythmic genes (RNA and RPF in kidney and liver; related to Fig. 3c). (XLSX 35 kb) [file 13059_2017_1222_MOESM5_ESM.xlsx]

## Sheet: SuppTableS4
Supplementary Table S4: Rhythmicity parameters of 178 common rhythmic genes (RNA and RPF in kidney and liver)
ensembl gene ID	gene_name	set	cyclic.kid.rpf	cyclic.fit.kid.rpf	amplitude.kid.rpf	phase.kid.rpf	cyclic.kid.rna	cyclic.fit.kid.rna	amplitude.kid.rna	phase.kid.rna	cyclic.liv.rpf	cyclic.fit.liv.rpf	amplitude.liv.rpf	phase.liv.rpf	cyclic.liv.rna	cyclic.fit.liv.rna	amplitude.liv.rna	phase.liv.rna
ENSMUSG00000000120	Ngfr	D	TRUE	sinusoidal	1.83187	3.0932	TRUE	sinusoidal	2.94217	4.59654	TRUE	sinusoidal	3.1475	1.91596	TRUE	sinusoidal	2.85993	0.978805
ENSMUSG00000001270	Ckb	D	TRUE	sinusoidal	1.5391	23.4978	TRUE	sinusoidal	1.57027	22.6921	TRUE	sinusoidal	1.75225	3.03621	TRUE	sinusoidal	1.54463	0.519652
ENSMUSG00000001774	Chordc1	D	TRUE	sinusoidal	1.96363	18.894	TRUE	sinusoidal	2.05087	19.3143	TRUE	sigmoid	2.09531	14.93	TRUE	sigmoid	2.36326	15.225
ENSMUSG00000002250	Ppard	D	TRUE	sigmoid	6.0752	1.765	TRUE	sinusoidal	7.5999	0.888539	TRUE	sigmoid	6.92053	0.185	TRUE	sigmoid	6.66305	0.75
ENSMUSG00000002409	Dyrk1b	D	TRUE	sinusoidal	1.64382	5.47993	TRUE	sinusoidal	1.5596	5.87689	TRUE	sinusoidal	2.21035	5.56026	TRUE	sinusoidal	2.31278	4.63948
ENSMUSG00000002797	Ggct	D	TRUE	sinusoidal	1.93931	2.96772	TRUE	sinusoidal	1.68904	2.70519	TRUE	sinusoidal	1.7602	22.6715	TRUE	sinusoidal	1.70383	1.26422
ENSMUSG00000003949	Hlf	D	TRUE	sinusoidal	1.61929	12.1141	TRUE	sinusoidal	1.82844	14.5508	TRUE	sinusoidal	1.94149	13.2035	TRUE	sinusoidal	2.30815	14.9197
ENSMUSG00000004098	Col5a3	D	TRUE	sinusoidal	2.12035	5.70451	TRUE	sinusoidal	2.15917	4.48384	TRUE	sinusoidal	2.36636	3.51804	TRUE	sinusoidal	2.61086	2.57777
ENSMUSG00000005125	Ndrg1	D	TRUE	sigmoid	3.37701	23.725	TRUE	sinusoidal	2.78554	23.7065	TRUE	sinusoidal	5.0529	2.48266	TRUE	sinusoidal	5.28456	1.77937
ENSMUSG00000005483	Dnajb1	D	TRUE	sigmoid	2.116	14.11	TRUE	sigmoid	2.45945	14.145	TRUE	sigmoid	2.15235	14.115	TRUE	sigmoid	2.05983	14.135
ENSMUSG00000005547	Cyp2a5	D	TRUE	sinusoidal	1.98906	14.5402	TRUE	sinusoidal	1.99403	14.9772	TRUE	sinusoidal	5.24041	14.3732	TRUE	sinusoidal	3.28174	14.715
ENSMUSG00000006641	Slc5a6	D	TRUE	sigmoid	1.96704	10.89	TRUE	sigmoid	1.94866	13.47	TRUE	sigmoid	3.70474	12.005	TRUE	sigmoid	3.64757	11.86
ENSMUSG00000009092	Derl3	D	TRUE	sigmoid	2.97136	19.645	TRUE	sigmoid	3.30112	18.9	TRUE	sigmoid	5.28613	19.965	TRUE	sigmoid	5.19361	19.91
ENSMUSG00000010307	Tmem86a	D	TRUE	sinusoidal	2.14485	6.05681	TRUE	sigmoid	2.73127	9.45	TRUE	sinusoidal	1.57379	7.33167	TRUE	sinusoidal	1.85525	5.93889
ENSMUSG00000011305	Plin5	D	TRUE	sinusoidal	1.69831	9.24847	TRUE	sinusoidal	1.93558	9.04765	TRUE	sinusoidal	1.97504	19.7021	TRUE	sinusoidal	1.70926	20.9624
ENSMUSG00000014905	Dnajb9	D	TRUE	sigmoid	1.7612	16.035	TRUE	sigmoid	1.67102	15.87	TRUE	sigmoid	2.59059	13.585	TRUE	sigmoid	2.65381	13.5
ENSMUSG00000015357	Clpx	D	TRUE	sinusoidal	2.19291	0.0305001	TRUE	sigmoid	2.10654	23.485	TRUE	sinusoidal	7.2319	0.168535	TRUE	sinusoidal	5.78529	0.407924
ENSMUSG00000015656	Hspa8	D	TRUE	sigmoid	2.19757	15.045	TRUE	sigmoid	2.06352	15.46	TRUE	sigmoid	3.05896	15.675	TRUE	sigmoid	2.63415	15.835
ENSMUSG00000015890	Amdhd1	D	TRUE	sinusoidal	2.07301	5.83526	TRUE	sinusoidal	2.75179	5.18025	TRUE	sinusoidal	2.37496	4.24174	TRUE	sinusoidal	2.66322	3.75364
ENSMUSG00000017146	Brca1	D	TRUE	sigmoid	2.27095	23.97	TRUE	sinusoidal	1.89943	23.3462	TRUE	sinusoidal	2.82134	15.2962	TRUE	sigmoid	2.86478	16.055
ENSMUSG00000018166	Erbb3	D	TRUE	sinusoidal	1.71146	5.26069	TRUE	sinusoidal	1.96875	4.97441	TRUE	sinusoidal	1.55237	2.09354	TRUE	sinusoidal	1.75265	2.34609
ENSMUSG00000018427	Ypel2	D	TRUE	sinusoidal	4.25406	22.3602	TRUE	sinusoidal	4.65962	22.246	TRUE	sinusoidal	4.30521	0.129413	TRUE	sinusoidal	3.37581	23.5719
ENSMUSG00000019082	Slc25a22	D	TRUE	sinusoidal	1.7054	0.729369	TRUE	sinusoidal	1.64938	0.850044	TRUE	sinusoidal	1.83203	5.59549	TRUE	sinusoidal	1.99103	5.14166
ENSMUSG00000019916	P4ha1	D	TRUE	sinusoidal	1.56585	19.5872	TRUE	sinusoidal	1.81164	20.137	TRUE	sigmoid	2.20027	14.61	TRUE	sigmoid	2.37128	14.505
ENSMUSG00000020038	Cry1	D	TRUE	sinusoidal	9.97905	18.2815	TRUE	sinusoidal	8.44656	18.5393	TRUE	sinusoidal	8.31345	20.2939	TRUE	sinusoidal	8.36617	20.6027
ENSMUSG00000020123	Avpr1a	D	TRUE	sinusoidal	3.10474	23.1548	TRUE	sinusoidal	3.61247	0.485191	TRUE	sinusoidal	3.93939	0.0245256	TRUE	sinusoidal	3.86317	23.9891
ENSMUSG00000020182	Ddc	D	TRUE	sinusoidal	2.57075	1.62562	TRUE	sinusoidal	2.35385	1.74117	TRUE	sinusoidal	3.03864	22.9131	TRUE	sinusoidal	3.02697	23.2449
ENSMUSG00000020190	Mknk2	D	TRUE	sinusoidal	1.53237	13.006	TRUE	sigmoid	1.75841	13.74	TRUE	sinusoidal	2.00508	14.2826	TRUE	sinusoidal	2.15303	13.7915
ENSMUSG00000020288	Ahsa2	D	TRUE	sinusoidal	1.70065	19.2444	TRUE	sinusoidal	2.03439	18.9645	TRUE	sigmoid	1.74388	15.66	TRUE	sigmoid	1.73612	15.425
ENSMUSG00000020381	3010026O09Rik	D	TRUE	sinusoidal	2.43574	4.22721	TRUE	sinusoidal	2.04643	5.66973	TRUE	sinusoidal	5.05942	3.66608	TRUE	sinusoidal	3.88729	3.62642
ENSMUSG00000020424	Gatsl3	D	TRUE	sinusoidal	1.51544	11.5509	TRUE	sinusoidal	1.72718	11.6038	TRUE	sinusoidal	1.87836	14.147	TRUE	sigmoid	2.7196	17.65
ENSMUSG00000020538	Srebf1	D	TRUE	sinusoidal	1.90499	19.586	TRUE	sinusoidal	1.60071	19.6211	TRUE	sinusoidal	2.20491	14.7922	TRUE	sinusoidal	1.97288	14.7726
ENSMUSG00000020572	Nampt	D	TRUE	sinusoidal	1.70818	14.5771	TRUE	sinusoidal	1.66473	16.4471	TRUE	sigmoid	3.79633	12.595	TRUE	sigmoid	3.48366	12.89
ENSMUSG00000020604	Arsg	D	TRUE	sigmoid	2.20158	3.365	TRUE	sinusoidal	1.98425	3.05247	TRUE	sinusoidal	2.70257	2.59722	TRUE	sinusoidal	2.32053	2.54718
ENSMUSG00000020614	Fam20a	D	TRUE	sinusoidal	1.92029	2.80034	TRUE	sinusoidal	1.89335	3.58357	TRUE	sinusoidal	1.65301	2.18373	TRUE	sinusoidal	1.602	2.69185
ENSMUSG00000020623	Map2k6	D	TRUE	sinusoidal	1.54845	10.4669	TRUE	sinusoidal	1.57966	8.66269	TRUE	sinusoidal	2.12474	15.4932	TRUE	sinusoidal	2.12112	13.5219
ENSMUSG00000020641	Rsad2	D	TRUE	sinusoidal	1.5839	0.0939231	TRUE	sinusoidal	1.65711	23.8719	TRUE	sinusoidal	3.77443	2.72513	TRUE	sinusoidal	3.04339	2.81727
ENSMUSG00000020679	Hnf1b	D	TRUE	sinusoidal	2.08588	2.80878	TRUE	sinusoidal	1.88832	3.71039	TRUE	sinusoidal	1.60506	0.412283	TRUE	sinusoidal	1.64819	21.9733
ENSMUSG00000020741	Cluh	D	TRUE	sinusoidal	1.58138	0.714077	TRUE	sinusoidal	1.58347	1.91727	TRUE	sinusoidal	1.59312	1.79693	TRUE	sinusoidal	1.6426	1.73203
ENSMUSG00000020889	Nr1d1	D	TRUE	sigmoid	12.9507	6.795	TRUE	sinusoidal	29.036	7.41683	TRUE	sigmoid	22.5507	6.655	TRUE	sigmoid	25.3045	6.475
ENSMUSG00000020893	Per1	D	TRUE	sigmoid	4.07939	10.27	TRUE	sigmoid	3.89938	10.97	TRUE	sigmoid	10.0233	11.135	TRUE	sigmoid	9.99937	10.23
ENSMUSG00000021270	Hsp90aa1	D	TRUE	sinusoidal	1.76248	20.6575	TRUE	sinusoidal	2.11603	20.0063	TRUE	sigmoid	2.48427	15.78	TRUE	sigmoid	2.67969	15.685
ENSMUSG00000021336	Slc17a4	D	TRUE	sinusoidal	2.3987	7.91798	TRUE	sinusoidal	2.19774	7.79288	TRUE	sinusoidal	1.88502	1.80705	TRUE	sinusoidal	1.97433	1.35534
ENSMUSG00000021483	Cdk20	D	TRUE	sinusoidal	1.77716	19.1887	TRUE	sinusoidal	1.62557	20.7117	TRUE	sinusoidal	1.76309	19.8278	TRUE	sinusoidal	2.44879	21.5107
ENSMUSG00000021559	Dapk1	D	TRUE	sinusoidal	1.53591	0.476577	TRUE	sinusoidal	1.67696	1.07233	TRUE	sinusoidal	2.28933	22.9968	TRUE	sinusoidal	2.57442	23.0825
ENSMUSG00000021775	Nr1d2	D	TRUE	sinusoidal	6.12093	10.3403	TRUE	sinusoidal	4.79302	10.2525	TRUE	sinusoidal	8.4641	10.486	TRUE	sinusoidal	9.05725	10.3605
ENSMUSG00000022218	Tgm1	D	TRUE	sinusoidal	1.98715	11.6107	TRUE	sinusoidal	1.95653	11.2962	TRUE	sinusoidal	2.29707	15.0374	TRUE	sinusoidal	1.77331	14.9487
ENSMUSG00000022389	Tef	D	TRUE	sinusoidal	2.746	11.0774	TRUE	sinusoidal	2.94435	11.3853	TRUE	sigmoid	6.59504	10.135	TRUE	sigmoid	5.66119	10.495
ENSMUSG00000022425	Enpp2	D	TRUE	sinusoidal	1.52635	15.5014	TRUE	sinusoidal	1.56385	16.5915	TRUE	sinusoidal	1.95374	13.5808	TRUE	sinusoidal	1.78704	13.3417
ENSMUSG00000022462	Slc38a2	D	TRUE	sigmoid	1.62728	15.095	TRUE	sigmoid	1.64641	15.69	TRUE	sinusoidal	2.42741	10.4883	TRUE	sinusoidal	2.21473	10.1114
ENSMUSG00000022512	Cldn1	D	TRUE	sinusoidal	1.72959	0.917535	TRUE	sinusoidal	1.73085	0.951189	TRUE	sinusoidal	4.3171	23.9109	TRUE	sinusoidal	5.38563	0.215465
ENSMUSG00000022550	Adck5	D	TRUE	sinusoidal	1.62706	2.24334	TRUE	sinusoidal	1.79038	4.5841	TRUE	sinusoidal	2.2501	2.53237	TRUE	sinusoidal	2.39646	2.7293
ENSMUSG00000022769	Sdf2l1	D	TRUE	sinusoidal	3.38305	20.1736	TRUE	sigmoid	2.41905	16.385	TRUE	sinusoidal	2.01958	23.427	TRUE	sinusoidal	1.9994	23.4879
ENSMUSG00000022797	Tfrc	D	TRUE	sinusoidal	1.60977	22.2383	TRUE	sinusoidal	1.98481	21.4698	TRUE	sigmoid	2.49305	13.93	TRUE	sigmoid	2.3817	14.055
ENSMUSG00000022951	Rcan1	D	TRUE	sigmoid	2.04073	14.505	TRUE	sigmoid	1.90878	14.5	TRUE	sigmoid	4.44129	13.855	TRUE	sigmoid	3.40182	13.87
ENSMUSG00000023067	Cdkn1a	D	TRUE	sinusoidal	2.42251	23.1261	TRUE	sigmoid	2.504	0.775	TRUE	sinusoidal	22.9732	22.8179	TRUE	sinusoidal	101.79	22.2419
ENSMUSG00000023073	Slc10a2	D	TRUE	sigmoid	2.10762	22.24	TRUE	sigmoid	2.18194	20.78	TRUE	sigmoid	3.06174	15.915	TRUE	sigmoid	2.90585	15.92
ENSMUSG00000024222	Fkbp5	D	TRUE	sigmoid	2.12242	15.015	TRUE	sigmoid	1.71625	15.715	TRUE	sigmoid	5.98703	15.915	TRUE	sigmoid	5.18413	15.9
ENSMUSG00000024827	Gldc	D	TRUE	sigmoid	1.91569	15.56	TRUE	sigmoid	1.82437	15.585	TRUE	sinusoidal	2.33712	23.809	TRUE	sigmoid	2.48083	23.435
ENSMUSG00000024966	Stip1	D	TRUE	sinusoidal	1.52194	19.6256	TRUE	sigmoid	1.58341	15.355	TRUE	sigmoid	1.79011	15.8	TRUE	sinusoidal	1.94734	18.6641
ENSMUSG00000025185	Loxl4	D	TRUE	sinusoidal	2.80602	1.31961	TRUE	sinusoidal	2.58827	1.32763	TRUE	sigmoid	9.27885	1.875	TRUE	sigmoid	9.64585	0.855
ENSMUSG00000025271	Pfkfb1	D	TRUE	sinusoidal	1.73084	8.45669	TRUE	sinusoidal	1.96348	7.65876	TRUE	sinusoidal	2.59643	18.2001	TRUE	sinusoidal	2.45163	17.8695
ENSMUSG00000025372	Baiap2	D	TRUE	sigmoid	1.67774	13.635	TRUE	sigmoid	1.95841	14.165	TRUE	sinusoidal	1.71449	20.9447	TRUE	sinusoidal	1.79559	20.0419
ENSMUSG00000025509	Pnpla2	D	TRUE	sinusoidal	1.54165	7.78075	TRUE	sinusoidal	1.86397	8.24221	TRUE	sigmoid	1.8815	10.335	TRUE	sigmoid	1.74184	10.585
ENSMUSG00000025511	Tspan4	D	TRUE	sinusoidal	2.81456	13.8193	TRUE	sinusoidal	1.94739	13.7033	TRUE	sinusoidal	3.81926	15.8075	TRUE	sinusoidal	2.66219	16.1106
ENSMUSG00000025981	Coq10b	D	TRUE	sigmoid	2.61256	12.095	TRUE	sinusoidal	2.24057	13.1991	TRUE	sigmoid	4.61238	10.585	TRUE	sigmoid	4.41575	9.75
ENSMUSG00000026077	Npas2	D	TRUE	sigmoid	19.1389	0.06	TRUE	sigmoid	11.1983	0.285	TRUE	sigmoid	11.3791	1.535	TRUE	sigmoid	14.5339	1.925
ENSMUSG00000026202	Tuba4a	D	TRUE	sinusoidal	1.53569	20.7058	TRUE	sinusoidal	1.50081	19.7215	TRUE	sinusoidal	1.77456	0.788067	TRUE	sigmoid	1.93989	20.685
ENSMUSG00000026348	Acmsd	D	TRUE	sinusoidal	2.06841	1.20756	TRUE	sinusoidal	2.40963	0.912152	TRUE	sinusoidal	2.94999	21.0047	TRUE	sinusoidal	3.02125	21.0041
ENSMUSG00000026566	Mpzl1	D	TRUE	sinusoidal	1.71026	2.95814	TRUE	sinusoidal	2.24658	3.92731	TRUE	sinusoidal	5.30149	0.983047	TRUE	sinusoidal	5.7091	1.59056
ENSMUSG00000026669	Mcm10	D	TRUE	sinusoidal	1.63967	10.8667	TRUE	sinusoidal	1.56259	9.42888	TRUE	sigmoid	2.83162	9.93	TRUE	sigmoid	2.53338	10.15
ENSMUSG00000026768	Itga8	D	TRUE	sinusoidal	2.48584	7.70101	TRUE	sinusoidal	1.89947	6.67052	TRUE	sinusoidal	2.30018	5.48438	TRUE	sinusoidal	1.80707	5.08073
ENSMUSG00000026773	Pfkfb3	D	TRUE	sinusoidal	1.66244	11.3565	TRUE	sinusoidal	1.76791	9.28398	TRUE	sigmoid	6.2753	10.165	TRUE	sigmoid	5.97527	10.265
ENSMUSG00000026822	Lcn2	D	TRUE	sigmoid	2.15179	15.59	TRUE	sigmoid	3.00029	15.795	TRUE	sigmoid	964.063	15.925	TRUE	sigmoid	193.263	15.935
ENSMUSG00000026839	Upp2	D	TRUE	sigmoid	3.9567	10.945	TRUE	sigmoid	2.79444	11.085	TRUE	sigmoid	4.11897	10.305	TRUE	sigmoid	3.85503	11.04
ENSMUSG00000027346	Gpcpd1	D	TRUE	sigmoid	1.93779	10.74	TRUE	sigmoid	1.53278	11.04	TRUE	sigmoid	4.73959	12.135	TRUE	sigmoid	4.97938	12.125
ENSMUSG00000027387	Zc3h8	D	TRUE	sinusoidal	1.58869	19.1895	TRUE	sinusoidal	1.63929	18.8125	TRUE	sinusoidal	2.03555	13.8748	TRUE	sinusoidal	3.46854	13.7523
ENSMUSG00000027513	Pck1	D	TRUE	sinusoidal	2.44677	14.8043	TRUE	sigmoid	2.23589	13.775	TRUE	sinusoidal	2.49873	9.56824	TRUE	sinusoidal	2.01829	9.61547
ENSMUSG00000028035	Dnajb4	D	TRUE	sigmoid	2.24456	13.93	TRUE	sinusoidal	2.32815	16.8897	TRUE	sigmoid	2.19901	14.06	TRUE	sigmoid	2.03742	14.17
ENSMUSG00000028150	Rorc	D	TRUE	sigmoid	3.71962	19.585	TRUE	sinusoidal	4.19676	18.8095	TRUE	sigmoid	5.02201	19.54	TRUE	sigmoid	4.5604	20.085
ENSMUSG00000028327	1300002K09Rik	D	TRUE	sinusoidal	3.34318	3.09546	TRUE	sinusoidal	2.94087	2.76088	TRUE	sinusoidal	2.13587	2.25619	TRUE	sinusoidal	2.17003	1.39652
ENSMUSG00000028410	Dnaja1	D	TRUE	sigmoid	1.87064	15.375	TRUE	sigmoid	1.70767	15.995	TRUE	sigmoid	2.0909	14.31	TRUE	sigmoid	2.24499	14.95
ENSMUSG00000028527	Ak4	D	TRUE	sinusoidal	2.32419	14.4245	TRUE	sinusoidal	1.87449	14.5848	TRUE	sinusoidal	2.72316	14.7825	TRUE	sinusoidal	2.23236	13.9791
ENSMUSG00000028862	Map3k6	D	TRUE	sinusoidal	2.67443	12.8219	TRUE	sinusoidal	2.03506	12.5031	TRUE	sigmoid	2.86909	15.105	TRUE	sinusoidal	2.55956	14.7144
ENSMUSG00000028919	Arhgef19	D	TRUE	sinusoidal	1.80502	23.9148	TRUE	sinusoidal	2.71033	2.85901	TRUE	sinusoidal	1.87308	23.5748	TRUE	sinusoidal	2.21686	0.106283
ENSMUSG00000028957	Per3	D	TRUE	sigmoid	4.83888	10.9	TRUE	sigmoid	4.94162	10.86	TRUE	sigmoid	16.5551	10.565	TRUE	sigmoid	10.9268	9.805
ENSMUSG00000028976	Slc2a5	D	TRUE	sinusoidal	1.56923	10.3769	TRUE	sinusoidal	1.60292	11.0128	TRUE	sigmoid	2.61812	10.515	TRUE	sigmoid	2.16787	9.955
ENSMUSG00000029238	Clock	D	TRUE	sinusoidal	1.62874	22.5261	TRUE	sinusoidal	1.64244	21.5299	TRUE	sinusoidal	2.14543	0.186622	TRUE	sinusoidal	1.97314	0.234248
ENSMUSG00000029328	Hnrnpdl	D	TRUE	sinusoidal	1.9828	7.12597	TRUE	sigmoid	1.58738	10.97	TRUE	sinusoidal	2.20557	9.47038	TRUE	sinusoidal	2.01178	9.12229
ENSMUSG00000029657	Hsph1	D	TRUE	sigmoid	2.17254	15.125	TRUE	sigmoid	1.86461	15.37	TRUE	sigmoid	2.9428	14.735	TRUE	sigmoid	3.01363	14.77
ENSMUSG00000029664	Tfpi2	D	TRUE	sinusoidal	1.68026	23.7324	TRUE	sinusoidal	2.0862	22.5005	TRUE	sinusoidal	2.31688	23.5877	TRUE	sinusoidal	1.91343	23.6335
ENSMUSG00000029804	Herc3	D	TRUE	sigmoid	2.59895	11.91	TRUE	sigmoid	1.91282	12.095	TRUE	sigmoid	2.34798	10.26	TRUE	sinusoidal	2.09388	7.62162
ENSMUSG00000029817	Tra2a	D	TRUE	sigmoid	2.11266	14.44	TRUE	sinusoidal	1.89061	18.5354	TRUE	sigmoid	3.13845	20.175	TRUE	sigmoid	2.48746	18.05
ENSMUSG00000030004	Nat8	D	TRUE	sinusoidal	1.89477	17.2291	TRUE	sigmoid	1.99447	13.985	TRUE	sinusoidal	2.49173	19.6424	TRUE	sinusoidal	3.34647	19.3091
ENSMUSG00000030031	Kbtbd8	D	TRUE	sinusoidal	1.80431	17.4451	TRUE	sinusoidal	2.05463	19.0333	TRUE	sinusoidal	3.49689	15.9843	TRUE	sigmoid	2.66637	14.075
ENSMUSG00000030103	Bhlhe40	D	TRUE	sinusoidal	1.75386	13.972	TRUE	sinusoidal	1.76307	13.4455	TRUE	sinusoidal	3.08175	13.7162	TRUE	sinusoidal	2.84919	13.5648
ENSMUSG00000030170	Wnt5b	D	TRUE	sinusoidal	1.76313	10.6404	TRUE	sigmoid	2.28777	12.395	TRUE	sinusoidal	4.23874	17.1939	TRUE	sinusoidal	3.12285	17.5481
ENSMUSG00000030256	Bhlhe41	D	TRUE	sinusoidal	4.98437	11.1057	TRUE	sigmoid	3.77805	8.935	TRUE	sigmoid	8.85507	9.935	TRUE	sigmoid	8.62311	9.235
ENSMUSG00000030562	Nox4	D	TRUE	sinusoidal	2.10604	15.3264	TRUE	sinusoidal	1.54418	15.6603	TRUE	sinusoidal	1.82808	11.3818	TRUE	sinusoidal	1.63996	10.9925
ENSMUSG00000030711	Sult1a1	D	TRUE	sigmoid	1.74954	15.8	TRUE	sinusoidal	1.74122	16.6637	TRUE	sinusoidal	1.52393	18.5569	TRUE	sinusoidal	1.69628	18.7792
ENSMUSG00000030762	Aqp8	D	TRUE	sinusoidal	634.622	0.85551	TRUE	sinusoidal	23.4159	0.836112	TRUE	sigmoid	5.14768	20.095	TRUE	sigmoid	5.72537	20.215
ENSMUSG00000030795	Fus	D	TRUE	sigmoid	2.14516	10.895	TRUE	sinusoidal	4.38638	7.45549	TRUE	sinusoidal	2.58735	6.15942	TRUE	sinusoidal	1.7167	7.64947
ENSMUSG00000030895	Hpx	D	TRUE	sigmoid	3.16654	15.435	TRUE	sigmoid	2.90101	3.325	TRUE	sigmoid	3.11427	15.845	TRUE	sigmoid	2.72104	15.845
ENSMUSG00000031016	Wee1	D	TRUE	sigmoid	2.93683	13.605	TRUE	sigmoid	2.35314	12.155	TRUE	sinusoidal	15.2214	13.4624	TRUE	sinusoidal	11.1739	13.1614
ENSMUSG00000031167	Rbm3	D	TRUE	sinusoidal	1.71895	11.8695	TRUE	sinusoidal	1.70818	13.3441	TRUE	sinusoidal	3.74537	12.6355	TRUE	sinusoidal	2.74941	12.5874
ENSMUSG00000031327	Chic1	D	TRUE	sinusoidal	1.80644	23.5828	TRUE	sinusoidal	1.61997	23.0105	TRUE	sinusoidal	2.80416	0.646202	TRUE	sinusoidal	2.66559	0.658084
ENSMUSG00000031431	Tsc22d3	D	TRUE	sigmoid	4.11828	14.65	TRUE	sigmoid	3.67745	14.31	TRUE	sinusoidal	5.16869	16.7999	TRUE	sinusoidal	3.77971	16.5355
ENSMUSG00000031762	Mt2	D	TRUE	sinusoidal	2.96222	7.95052	TRUE	sinusoidal	2.7473	8.43989	TRUE	sigmoid	964.063	15.925	TRUE	sigmoid	159.928	15.94
ENSMUSG00000031765	Mt1	D	TRUE	sinusoidal	2.45802	8.85873	TRUE	sinusoidal	2.29306	8.61885	TRUE	sigmoid	76.9838	15.875	TRUE	sigmoid	95.8435	15.895
ENSMUSG00000031770	Herpud1	D	TRUE	sigmoid	1.6647	15.295	TRUE	sigmoid	1.81232	14.845	TRUE	sigmoid	2.44084	14.05	TRUE	sigmoid	2.36284	14.045
ENSMUSG00000032010	Usp2	D	TRUE	sinusoidal	2.18473	13.1325	TRUE	sigmoid	1.99308	10.985	TRUE	sigmoid	17.1502	10.11	TRUE	sigmoid	16.9621	10.485
ENSMUSG00000032420	Nt5e	D	TRUE	sinusoidal	2.30177	22.2756	TRUE	sinusoidal	2.35962	21.8128	TRUE	sinusoidal	1.79791	22.2173	TRUE	sinusoidal	2.04663	21.3363
ENSMUSG00000032515	Csrnp1	D	TRUE	sinusoidal	1.92896	10.9685	TRUE	sinusoidal	1.66635	10.6002	TRUE	sinusoidal	2.93143	9.06589	TRUE	sinusoidal	2.40984	9.55485
ENSMUSG00000032786	Alas1	D	TRUE	sigmoid	2.03188	13.86	TRUE	sinusoidal	2.04675	14.7183	TRUE	sigmoid	4.92482	10.31	TRUE	sigmoid	4.55096	10.265
ENSMUSG00000032902	Slc16a1	D	TRUE	sinusoidal	4.07367	22.947	TRUE	sinusoidal	4.38666	22.7831	TRUE	sinusoidal	1.5368	22.6363	TRUE	sinusoidal	1.64242	23.4569
ENSMUSG00000033107	Rnf125	D	TRUE	sinusoidal	2.39401	0.721562	TRUE	sinusoidal	1.86712	23.5	TRUE	sinusoidal	10.7475	0.413235	TRUE	sinusoidal	8.20953	0.539697
ENSMUSG00000035486	Plk5	D	TRUE	sinusoidal	2.06195	16.2549	TRUE	sigmoid	1.79484	13.51	TRUE	sinusoidal	1.96507	17.3986	TRUE	sinusoidal	2.2114	18.8044
ENSMUSG00000036181	Hist1h1c	D	TRUE	sinusoidal	2.25433	6.22523	TRUE	sinusoidal	2.21317	7.24564	TRUE	sinusoidal	1.56734	20.2887	TRUE	sinusoidal	1.72493	20.7879
ENSMUSG00000036752	Tubb4b	D	TRUE	sinusoidal	1.51182	20.8089	TRUE	sinusoidal	1.49998	20.0809	TRUE	sinusoidal	1.78168	1.49301	TRUE	sinusoidal	1.76792	0.977021
ENSMUSG00000037003	Tenc1	D	TRUE	sinusoidal	1.92785	9.50988	TRUE	sinusoidal	1.90222	9.61444	TRUE	sigmoid	2.48794	7.49	TRUE	sigmoid	1.97247	8.69
ENSMUSG00000037697	Ddhd1	D	TRUE	sinusoidal	1.79398	22.917	TRUE	sinusoidal	1.62175	23.1626	TRUE	sinusoidal	1.64329	22.544	TRUE	sinusoidal	1.53683	23.6343
ENSMUSG00000037847	Nmrk1	D	TRUE	sinusoidal	1.55379	13.5088	TRUE	sigmoid	1.64496	10.235	TRUE	sigmoid	3.69223	12.745	TRUE	sigmoid	2.93644	12.57
ENSMUSG00000037921	Ddx60	D	TRUE	sinusoidal	2.3041	6.86087	TRUE	sinusoidal	1.68728	4.65467	TRUE	sinusoidal	3.32251	5.48837	TRUE	sinusoidal	2.28553	6.01316
ENSMUSG00000038526	Car14	D	TRUE	sinusoidal	1.85577	11.9347	TRUE	sinusoidal	1.67211	12.5419	TRUE	sinusoidal	1.70203	21.5947	TRUE	sinusoidal	1.75327	22.1512
ENSMUSG00000038550	Gm129	D	TRUE	sigmoid	25.3264	9.685	TRUE	sigmoid	24.0715	10.03	TRUE	sigmoid	47.772	9.875	TRUE	sigmoid	32.8073	9.845
ENSMUSG00000039157	Fam102a	D	TRUE	sinusoidal	1.57541	13.9805	TRUE	sigmoid	1.92142	13.75	TRUE	sinusoidal	2.72848	14.3773	TRUE	sinusoidal	2.31598	14.061
ENSMUSG00000039405	Prss23	D	TRUE	sinusoidal	1.98253	2.74815	TRUE	sinusoidal	1.54263	1.84471	TRUE	sinusoidal	1.62659	2.23571	TRUE	sinusoidal	1.53142	0.252377
ENSMUSG00000039632	Ccdc151	D	TRUE	sinusoidal	1.77262	2.86312	TRUE	sinusoidal	1.66893	5.12893	TRUE	sinusoidal	2.66535	17.0235	TRUE	sinusoidal	3.43311	18.1464
ENSMUSG00000039633	Lonrf1	D	TRUE	sinusoidal	2.30863	12.7354	TRUE	sinusoidal	2.03349	12.3759	TRUE	sinusoidal	4.06577	14.6684	TRUE	sinusoidal	2.94156	13.8351
ENSMUSG00000039982	Dtx4	D	TRUE	sinusoidal	3.03656	0.575806	TRUE	sinusoidal	2.51501	1.11715	TRUE	sinusoidal	4.47324	0.993697	TRUE	sinusoidal	4.77211	0.680183
ENSMUSG00000040093	Bmf	D	TRUE	sinusoidal	1.86185	8.04166	TRUE	sinusoidal	1.72448	9.10228	TRUE	sigmoid	2.05449	7.685	TRUE	sigmoid	2.37272	9.02
ENSMUSG00000040128	Pnrc1	D	TRUE	sinusoidal	1.76409	22.2147	TRUE	sinusoidal	1.50363	21.4287	TRUE	sinusoidal	3.99132	23.3167	TRUE	sinusoidal	3.28571	22.8636
ENSMUSG00000040557	Wbscr27	D	TRUE	sinusoidal	1.4952	8.2209	TRUE	sinusoidal	1.67662	7.20819	TRUE	sinusoidal	1.77869	5.54368	TRUE	sinusoidal	1.75513	5.33597
ENSMUSG00000040675	Mthfd1l	D	TRUE	sigmoid	2.75997	12.87	TRUE	sigmoid	2.25992	11.93	TRUE	sigmoid	4.65641	13.59	TRUE	sigmoid	3.57868	11.12
ENSMUSG00000040964	Arhgef10l	D	TRUE	sinusoidal	1.86092	0.42073	TRUE	sinusoidal	1.74385	1.05794	TRUE	sinusoidal	1.79789	4.71603	TRUE	sinusoidal	2.05835	3.3067
ENSMUSG00000041132	N4bp2l1	D	TRUE	sinusoidal	2.24799	5.592	TRUE	sinusoidal	1.66271	6.91463	TRUE	sinusoidal	1.64265	11.2588	TRUE	sinusoidal	1.88852	13.5047
ENSMUSG00000041459	Tardbp	D	TRUE	sinusoidal	1.89692	19.9917	TRUE	sinusoidal	1.63952	21.371	TRUE	sinusoidal	2.01781	21.7598	TRUE	sinusoidal	1.53986	21.4319
ENSMUSG00000042487	Leo1	D	TRUE	sinusoidal	2.22895	22.4936	TRUE	sinusoidal	2.33137	22.0168	TRUE	sigmoid	2.76652	22.555	TRUE	sinusoidal	2.28612	23.1429
ENSMUSG00000045193	Cirbp	D	TRUE	sigmoid	2.74046	10.265	TRUE	sigmoid	2.81182	10.155	TRUE	sigmoid	2.39581	10.08	TRUE	sinusoidal	2.30604	5.31035
ENSMUSG00000045441	Gprin3	D	TRUE	sinusoidal	2.52092	6.8062	TRUE	sinusoidal	2.00879	6.80188	TRUE	sinusoidal	1.57982	7.8302	TRUE	sinusoidal	1.52298	8.00627
ENSMUSG00000045672	Col27a1	D	TRUE	sinusoidal	2.44378	14.3206	TRUE	sinusoidal	2.5492	14.514	TRUE	sigmoid	3.48704	13.25	TRUE	sinusoidal	3.41475	18.2934
ENSMUSG00000046667	Rbm12b1	D	TRUE	sinusoidal	2.30537	17.4804	TRUE	sinusoidal	1.69334	18.896	TRUE	sinusoidal	3.80114	18.7907	TRUE	sinusoidal	2.47691	19.7322
ENSMUSG00000048546	Tob2	D	TRUE	sinusoidal	1.59667	14.5031	TRUE	sigmoid	1.60707	12.8	TRUE	sinusoidal	2.33309	12.2165	TRUE	sigmoid	2.21545	9.965
ENSMUSG00000050777	Tmem37	D	TRUE	sigmoid	1.76443	16.4	TRUE	sinusoidal	1.66294	18.7205	TRUE	sinusoidal	2.00537	18.1774	TRUE	sigmoid	2.08054	19.525
ENSMUSG00000052040	Klf13	D	TRUE	sinusoidal	1.70342	9.53972	TRUE	sinusoidal	2.14252	9.79201	TRUE	sinusoidal	2.12561	11.9384	TRUE	sigmoid	2.4445	12.29
ENSMUSG00000052837	Junb	D	TRUE	sinusoidal	1.82753	6.01038	TRUE	sinusoidal	1.77119	8.72783	TRUE	sinusoidal	3.54947	5.60069	TRUE	sinusoidal	3.29817	5.41722
ENSMUSG00000053846	Lipg	D	TRUE	sigmoid	2.05836	12.925	TRUE	sinusoidal	2.3873	16.7186	TRUE	sigmoid	3.35222	13.61	TRUE	sigmoid	3.46123	13.86
ENSMUSG00000055065	Ddx17	D	TRUE	sinusoidal	1.9457	20.3553	TRUE	sinusoidal	1.54572	22.1499	TRUE	sinusoidal	2.14063	0.394399	TRUE	sinusoidal	1.70355	1.38333
ENSMUSG00000055116	Arntl	D	TRUE	sinusoidal	40.2516	22.7048	TRUE	sinusoidal	28.6148	22.5587	TRUE	sinusoidal	33.2937	23.4287	TRUE	sigmoid	25.6164	1.105
ENSMUSG00000055866	Per2	D	TRUE	sinusoidal	10.5166	14.7256	TRUE	sinusoidal	10.8004	14.5438	TRUE	sigmoid	7.96786	16.405	TRUE	sinusoidal	11.0458	15.4722
ENSMUSG00000056025	Clca1	D	TRUE	sigmoid	1.58626	15.625	TRUE	sigmoid	1.88034	16.03	TRUE	sigmoid	1.65593	15.63	TRUE	sinusoidal	1.66659	16.4256
ENSMUSG00000056071	S100a9	D	TRUE	sigmoid	9.74727	15.875	TRUE	sigmoid	9.16471	15.975	TRUE	sigmoid	23.6025	15.895	TRUE	sigmoid	50.4865	15.935
ENSMUSG00000056749	Nfil3	D	TRUE	sinusoidal	8.88079	21.3117	TRUE	sinusoidal	8.81465	21.6309	TRUE	sinusoidal	5.9638	22.5586	TRUE	sinusoidal	4.49161	23.013
ENSMUSG00000056973	Ces1d	D	TRUE	sinusoidal	1.66306	17.3842	TRUE	sinusoidal	1.80644	17.5061	TRUE	sinusoidal	2.4925	19.3882	TRUE	sinusoidal	2.53914	19.3569
ENSMUSG00000058620	Adra2b	D	TRUE	sinusoidal	1.78429	16.8425	TRUE	sinusoidal	1.77675	15.5024	TRUE	sinusoidal	1.69808	23.1857	TRUE	sinusoidal	2.35899	23.6577
ENSMUSG00000058672	Tubb2a	D	TRUE	sinusoidal	2.12093	20.2262	TRUE	sinusoidal	1.887	20.8241	TRUE	sinusoidal	11.7879	23.7277	TRUE	sinusoidal	12.9792	23.6745
ENSMUSG00000058756	Thra	D	TRUE	sinusoidal	1.84588	2.87267	TRUE	sinusoidal	1.60405	3.31934	TRUE	sinusoidal	2.56799	1.08011	TRUE	sinusoidal	2.11068	0.0837496
ENSMUSG00000059743	Fdps	D	TRUE	sinusoidal	1.76021	22.9088	TRUE	sinusoidal	1.86253	22.7119	TRUE	sinusoidal	1.68964	21.1257	TRUE	sinusoidal	1.75196	21.1624
ENSMUSG00000059824	Dbp	D	TRUE	sigmoid	17.4257	9.16	TRUE	sigmoid	19.7656	9.525	TRUE	sigmoid	27.5547	9.045	TRUE	sigmoid	24.4273	9.095
ENSMUSG00000059970	Hspa2	D	TRUE	sigmoid	1.69837	15.585	TRUE	sinusoidal	1.73945	11.7164	TRUE	sinusoidal	3.44252	14.7317	TRUE	sigmoid	2.87512	17.91
ENSMUSG00000060317	Acnat2	D	TRUE	sigmoid	2.32491	16.215	TRUE	sigmoid	2.42073	16.285	TRUE	sigmoid	8.58807	15.965	TRUE	sigmoid	7.17927	15.97
ENSMUSG00000060862	Zbtb40	D	TRUE	sinusoidal	1.61968	18.2584	TRUE	sigmoid	1.56439	14.83	TRUE	sinusoidal	1.67708	16.6094	TRUE	sinusoidal	1.51965	17.629
ENSMUSG00000063146	Clip2	D	TRUE	sinusoidal	1.63889	0.796895	TRUE	sigmoid	1.56704	5.42	TRUE	sinusoidal	1.73502	22.0741	TRUE	sinusoidal	1.58586	23.5607
ENSMUSG00000064254	Ethe1	D	TRUE	sigmoid	2.26621	1.74	TRUE	sinusoidal	2.08445	1.2545	TRUE	sinusoidal	3.57607	0.717336	TRUE	sinusoidal	3.83456	0.220163
ENSMUSG00000066687	Zbtb16	D	TRUE	sigmoid	3.29699	12.685	TRUE	sigmoid	3.36558	12.895	TRUE	sigmoid	2.94127	13.045	TRUE	sigmoid	2.35078	12.875
ENSMUSG00000068735	Trp53i11	D	TRUE	sinusoidal	1.62916	5.3455	TRUE	sinusoidal	1.64602	5.15847	TRUE	sinusoidal	1.7826	4.77677	TRUE	sinusoidal	1.77057	1.67717
ENSMUSG00000068742	Cry2	D	TRUE	sigmoid	2.18443	14.25	TRUE	sinusoidal	2.03398	13.2048	TRUE	sinusoidal	2.04072	13.6998	TRUE	sinusoidal	1.60353	13.5957
ENSMUSG00000068876	Cgn	D	TRUE	sinusoidal	1.79391	1.30666	TRUE	sinusoidal	1.85166	3.52713	TRUE	sinusoidal	2.58239	23.3001	TRUE	sinusoidal	2.40104	23.3575
ENSMUSG00000070644	Etnk2	D	TRUE	sinusoidal	2.07469	9.89514	TRUE	sinusoidal	1.57044	13.2087	TRUE	sinusoidal	1.75145	13.297	TRUE	sinusoidal	1.58921	12.6285
ENSMUSG00000070985	Acnat1	D	TRUE	sinusoidal	1.53697	23.5569	TRUE	sinusoidal	1.49543	23.8453	TRUE	sinusoidal	1.84331	22.2664	TRUE	sinusoidal	1.63281	23.5154
ENSMUSG00000071551	Akr1c19	D	TRUE	sigmoid	1.62157	15.83	TRUE	sinusoidal	1.84703	16.1088	TRUE	sinusoidal	2.25591	14.3484	TRUE	sinusoidal	2.26116	13.9744
ENSMUSG00000071633	Gm4952	D	TRUE	sinusoidal	1.9434	0.813988	TRUE	sinusoidal	1.9789	22.4214	TRUE	sinusoidal	2.93574	2.68711	TRUE	sinusoidal	2.47524	2.55055
ENSMUSG00000074063	Osgin1	D	TRUE	sinusoidal	1.98956	16.5634	TRUE	sigmoid	2.29542	14.515	TRUE	sinusoidal	3.47075	2.05804	TRUE	sinusoidal	2.8189	1.16512
ENSMUSG00000074794	Arrdc3	D	TRUE	sinusoidal	1.74464	21.958	TRUE	sinusoidal	2.02554	21.7791	TRUE	sinusoidal	2.70877	8.23833	TRUE	sinusoidal	2.98757	8.34001
ENSMUSG00000075232	Amd1	D	TRUE	sinusoidal	1.78903	17.8084	TRUE	sinusoidal	1.57625	18.9605	TRUE	sigmoid	2.35054	13.925	TRUE	sinusoidal	2.45331	13.3268
ENSMUSG00000079494	Cml5	D	TRUE	sigmoid	3.73908	15.615	TRUE	sigmoid	4.23327	15.445	TRUE	sinusoidal	7.04712	19.4494	TRUE	sinusoidal	8.12891	19.0347
ENSMUSG00000089774	Slc5a3	D	TRUE	sigmoid	1.73088	16.075	TRUE	sigmoid	1.64224	15.645	TRUE	sinusoidal	1.75337	17.7305	TRUE	sigmoid	2.03782	17.86
ENSMUSG00000090877	Hspa1b	D	TRUE	sigmoid	5.54216	15.005	TRUE	sigmoid	4.86465	14.66	TRUE	sigmoid	6.25833	14.125	TRUE	sigmoid	5.93918	14.29
